# Supplementary material for: Knock-in Mouse Model of Hereditary Myopathy with Early Respiratory Failure Carrying the Titin Variant Corresponding to Human p.N31786K
Source: Research Square preprint supplement (doi:10.21203/rs.3.rs-8910535/v1), 2026-02-23
Supplement: Supplementary file 1 [file 2fa784c022b5e522640de5d5.xlsx]

## Sheet: Sheet1
accession	logFC	AveExpr	t	P.Value	adj.P.Val	B	Reviewed	Entry.Name	Protein.names	Gene.Names	Length	Gene.Ontology..biological.process.	Gene.Ontology..cellular.component.	Gene.Ontology..molecular.function.	Gene.Ontology..GO.	Gene.Ontology.IDs	Active.site	Binding.site	Taxonomic.lineage	Taxonomic.lineage..Ids.	Post.translational.modification	Interacts.with	Subunit.structure
A2ABU4	1.4212	26.0555	8.04719	3.00834e-05	0.00239936	2.91884	reviewed	MYOM3_MOUSE	Myomesin-3 (Myomesin family member 3)	Myom3	1439		M band [GO:0031430]	identical protein binding [GO:0042802]; protein homodimerization activity [GO:0042803]	M band [GO:0031430]; identical protein binding [GO:0042802]; protein homodimerization activity [GO:0042803]	GO:0031430; GO:0042802; GO:0042803			cellular organisms (no rank), Eukaryota (superkingdom), Opisthokonta (clade), Metazoa (kingdom), Eumetazoa (clade), Bilateria (clade), Deuterostomia (clade), Chordata (phylum), Craniata (subphylum), Vertebrata (clade), Gnathostomata (clade), Teleostomi (clade), Euteleostomi (clade), Sarcopterygii (superclass), Dipnotetrapodomorpha (clade), Tetrapoda (clade), Amniota (clade), Mammalia (class), The…	131567 (no rank), 2759 (superkingdom), 33154 (clade), 33208 (kingdom), 6072 (clade), 33213 (clade), 33511 (clade), 7711 (phylum), 89593 (subphylum), 7742 (clade), 7776 (clade), 117570 (clade), 117571 (clade), 8287 (superclass), 1338369 (clade), 32523 (clade), 32524 (clade), 40674 (class), 32525 (clade), 9347 (clade), 1437010 (clade), 314146 (superorder), 314147 (clade), 9989 (order), 1963758 (sub…			SUBUNIT: Homodimer. {ECO:0000269|PubMed:18177667}.
A2AUC9	0.882249	27.572	5.59318	0.000418958	0.0105656	0.165087	reviewed	KLH41_MOUSE	Kelch-like protein 41 (Kelch repeat and BTB domain-containing protein 10)	Klhl41 Kbtbd10	606	myofibril assembly [GO:0030239]; protein ubiquitination [GO:0016567]; pseudopodium assembly [GO:0031269]; regulation of myoblast differentiation [GO:0045661]; regulation of myoblast proliferation [GO:2000291]; regulation of skeletal muscle cell differentiation [GO:2001014]; skeletal muscle cell differentiation [GO:0035914]	Cul3-RING ubiquitin ligase complex [GO:0031463]; cytoplasm [GO:0005737]; cytoskeleton [GO:0005856]; cytosol [GO:0005829]; endoplasmic reticulum membrane [GO:0005789]; M band [GO:0031430]; nucleoplasm [GO:0005654]; plasma membrane [GO:0005886]; pseudopodium [GO:0031143]; ruffle [GO:0001726]; sarcoplasmic reticulum membrane [GO:0033017]		Cul3-RING ubiquitin ligase complex [GO:0031463]; cytoplasm [GO:0005737]; cytoskeleton [GO:0005856]; cytosol [GO:0005829]; endoplasmic reticulum membrane [GO:0005789]; M band [GO:0031430]; nucleoplasm [GO:0005654]; plasma membrane [GO:0005886]; pseudopodium [GO:0031143]; ruffle [GO:0001726]; sarcoplasmic reticulum membrane [GO:0033017]; myofibril assembly [GO:0030239]; protein ubiquitination [GO:0…	GO:0001726; GO:0005654; GO:0005737; GO:0005789; GO:0005829; GO:0005856; GO:0005886; GO:0016567; GO:0030239; GO:0031143; GO:0031269; GO:0031430; GO:0031463; GO:0033017; GO:0035914; GO:0045661; GO:2000291; GO:2001014			cellular organisms (no rank), Eukaryota (superkingdom), Opisthokonta (clade), Metazoa (kingdom), Eumetazoa (clade), Bilateria (clade), Deuterostomia (clade), Chordata (phylum), Craniata (subphylum), Vertebrata (clade), Gnathostomata (clade), Teleostomi (clade), Euteleostomi (clade), Sarcopterygii (superclass), Dipnotetrapodomorpha (clade), Tetrapoda (clade), Amniota (clade), Mammalia (class), The…	131567 (no rank), 2759 (superkingdom), 33154 (clade), 33208 (kingdom), 6072 (clade), 33213 (clade), 33511 (clade), 7711 (phylum), 89593 (subphylum), 7742 (clade), 7776 (clade), 117570 (clade), 117571 (clade), 8287 (superclass), 1338369 (clade), 32523 (clade), 32524 (clade), 40674 (class), 32525 (clade), 9347 (clade), 1437010 (clade), 314146 (superorder), 314147 (clade), 9989 (order), 1963758 (sub…	PTM: Ubiquitinated by E3 ubiquitin ligase complex formed by CUL3 and RBX1 and probably targeted for proteasome-independent degradation. Quinone-induced oxidative stress increases its ubiquitination. {ECO:0000250|UniProtKB:O60662}.		SUBUNIT: Interacts with NRAP. Part of a complex that contains CUL3, RBX1 and KLHL41. Interacts with LASP1. {ECO:0000250|UniProtKB:O60662, ECO:0000250|UniProtKB:Q9ER30}.
O09061	0.555762	21.7145	3.91483	0.00397811	0.036481	-2.19745	reviewed	PSB1_MOUSE	Proteasome subunit beta type-1 (Macropain subunit C5) (Multicatalytic endopeptidase complex subunit C5) (Proteasome component C5) (Proteasome gamma chain) (Proteasome subunit beta-6) (beta-6)	Psmb1	240	proteolysis involved in protein catabolic process [GO:0051603]	cytosol [GO:0005829]; nucleoplasm [GO:0005654]; proteasome core complex [GO:0005839]; proteasome core complex, beta-subunit complex [GO:0019774]		cytosol [GO:0005829]; nucleoplasm [GO:0005654]; proteasome core complex [GO:0005839]; proteasome core complex, beta-subunit complex [GO:0019774]; proteolysis involved in protein catabolic process [GO:0051603]	GO:0005654; GO:0005829; GO:0005839; GO:0019774; GO:0051603			cellular organisms (no rank), Eukaryota (superkingdom), Opisthokonta (clade), Metazoa (kingdom), Eumetazoa (clade), Bilateria (clade), Deuterostomia (clade), Chordata (phylum), Craniata (subphylum), Vertebrata (clade), Gnathostomata (clade), Teleostomi (clade), Euteleostomi (clade), Sarcopterygii (superclass), Dipnotetrapodomorpha (clade), Tetrapoda (clade), Amniota (clade), Mammalia (class), The…	131567 (no rank), 2759 (superkingdom), 33154 (clade), 33208 (kingdom), 6072 (clade), 33213 (clade), 33511 (clade), 7711 (phylum), 89593 (subphylum), 7742 (clade), 7776 (clade), 117570 (clade), 117571 (clade), 8287 (superclass), 1338369 (clade), 32523 (clade), 32524 (clade), 40674 (class), 32525 (clade), 9347 (clade), 1437010 (clade), 314146 (superorder), 314147 (clade), 9989 (order), 1963758 (sub…			SUBUNIT: The 26S proteasome consists of a 20S proteasome core and two 19S regulatory subunits. The 20S proteasome core is a barrel-shaped complex made of 28 subunits that are arranged in four stacked rings. The two outer rings are each formed by seven alpha subunits, and the two inner rings are formed by seven beta subunits. The proteolytic activity is exerted by three beta-subunits PSMB5, PSMB6 …
O70209	1.45082	27.1156	8.1343	2.77218e-05	0.00239936	3.00336	reviewed	PDLI3_MOUSE	PDZ and LIM domain protein 3 (Actinin-associated LIM protein) (Alpha-actinin-2-associated LIM protein)	Pdlim3	316	actin filament organization [GO:0007015]; heart development [GO:0007507]	actin cytoskeleton [GO:0015629]; Z disc [GO:0030018]	cytoskeletal protein binding [GO:0008092]; metal ion binding [GO:0046872]; structural constituent of muscle [GO:0008307]	actin cytoskeleton [GO:0015629]; Z disc [GO:0030018]; cytoskeletal protein binding [GO:0008092]; metal ion binding [GO:0046872]; structural constituent of muscle [GO:0008307]; actin filament organization [GO:0007015]; heart development [GO:0007507]	GO:0007015; GO:0007507; GO:0008092; GO:0008307; GO:0015629; GO:0030018; GO:0046872			cellular organisms (no rank), Eukaryota (superkingdom), Opisthokonta (clade), Metazoa (kingdom), Eumetazoa (clade), Bilateria (clade), Deuterostomia (clade), Chordata (phylum), Craniata (subphylum), Vertebrata (clade), Gnathostomata (clade), Teleostomi (clade), Euteleostomi (clade), Sarcopterygii (superclass), Dipnotetrapodomorpha (clade), Tetrapoda (clade), Amniota (clade), Mammalia (class), The…	131567 (no rank), 2759 (superkingdom), 33154 (clade), 33208 (kingdom), 6072 (clade), 33213 (clade), 33511 (clade), 7711 (phylum), 89593 (subphylum), 7742 (clade), 7776 (clade), 117570 (clade), 117571 (clade), 8287 (superclass), 1338369 (clade), 32523 (clade), 32524 (clade), 40674 (class), 32525 (clade), 9347 (clade), 1437010 (clade), 314146 (superorder), 314147 (clade), 9989 (order), 1963758 (sub…			SUBUNIT: Interacts with ACTN2 (By similarity). Forms a heterodimer with PDLIM4 (via LIM domain) (PubMed:15663004). {ECO:0000250|UniProtKB:Q66HS7, ECO:0000269|PubMed:15663004}.
O70310	-0.606484	25.1131	-3.5047	0.00733024	0.0455934	-2.83237	reviewed	NMT1_MOUSE	Glycylpeptide N-tetradecanoyltransferase 1 (EC 2.3.1.97) (Myristoyl-CoA:protein N-myristoyltransferase 1) (NMT 1) (Type I N-myristoyltransferase) (Peptide N-myristoyltransferase 1)	Nmt1	496	in utero embryonic development [GO:0001701]; ketone metabolic process [GO:0042180]; N-terminal peptidyl-glycine N-myristoylation [GO:0018008]; protein localization to membrane [GO:0072657]	cytoplasm [GO:0005737]; cytosol [GO:0005829]; plasma membrane [GO:0005886]	glycylpeptide N-tetradecanoyltransferase activity [GO:0004379]; peptidyl-lysine N6-myristoyltransferase activity [GO:0018030]	cytoplasm [GO:0005737]; cytosol [GO:0005829]; plasma membrane [GO:0005886]; glycylpeptide N-tetradecanoyltransferase activity [GO:0004379]; peptidyl-lysine N6-myristoyltransferase activity [GO:0018030]; in utero embryonic development [GO:0001701]; ketone metabolic process [GO:0042180]; N-terminal peptidyl-glycine N-myristoylation [GO:0018008]; protein localization to membrane [GO:0072657]	GO:0001701; GO:0004379; GO:0005737; GO:0005829; GO:0005886; GO:0018008; GO:0018030; GO:0042180; GO:0072657		BINDING 118; /ligand=tetradecanoyl-CoA; /ligand_id=ChEBI:CHEBI:57385; /evidence=ECO:0000250|UniProtKB:P30419; BINDING 119; /ligand=tetradecanoyl-CoA; /ligand_id=ChEBI:CHEBI:57385; /evidence=ECO:0000250|UniProtKB:P30419; BINDING 120; /ligand=tetradecanoyl-CoA; /ligand_id=ChEBI:CHEBI:57385; /evidence=ECO:0000250|UniProtKB:P30419; BINDING 247; /ligand=tetradecanoyl-CoA; /ligand_id=ChEBI:CHEBI:57385;…	cellular organisms (no rank), Eukaryota (superkingdom), Opisthokonta (clade), Metazoa (kingdom), Eumetazoa (clade), Bilateria (clade), Deuterostomia (clade), Chordata (phylum), Craniata (subphylum), Vertebrata (clade), Gnathostomata (clade), Teleostomi (clade), Euteleostomi (clade), Sarcopterygii (superclass), Dipnotetrapodomorpha (clade), Tetrapoda (clade), Amniota (clade), Mammalia (class), The…	131567 (no rank), 2759 (superkingdom), 33154 (clade), 33208 (kingdom), 6072 (clade), 33213 (clade), 33511 (clade), 7711 (phylum), 89593 (subphylum), 7742 (clade), 7776 (clade), 117570 (clade), 117571 (clade), 8287 (superclass), 1338369 (clade), 32523 (clade), 32524 (clade), 40674 (class), 32525 (clade), 9347 (clade), 1437010 (clade), 314146 (superorder), 314147 (clade), 9989 (order), 1963758 (sub…
O70373	3.32232	23.4859	7.87674	3.53745e-05	0.00239936	2.7511	reviewed	XIRP1_MOUSE	Xin actin-binding repeat-containing protein 1 (Cardiomyopathy-associated protein 1)	Xirp1 Cmya1 Xin Xin-alpha	1129	cardiac muscle cell development [GO:0055013]; heart morphogenesis [GO:0003007]; myoblast differentiation involved in skeletal muscle regeneration [GO:0014835]; negative regulation of cell population proliferation [GO:0008285]; Notch signaling pathway [GO:0007219]; protein localization [GO:0008104]; regulation of membrane potential [GO:0042391]; sarcomere organization [GO:0045214]; satellite cell …	adherens junction [GO:0005912]; desmosome [GO:0030057]; fascia adherens [GO:0005916]; intercalated disc [GO:0014704]	actin binding [GO:0003779]; filamin binding [GO:0031005]	adherens junction [GO:0005912]; desmosome [GO:0030057]; fascia adherens [GO:0005916]; intercalated disc [GO:0014704]; actin binding [GO:0003779]; filamin binding [GO:0031005]; cardiac muscle cell development [GO:0055013]; heart morphogenesis [GO:0003007]; myoblast differentiation involved in skeletal muscle regeneration [GO:0014835]; negative regulation of cell population proliferation [GO:000828…	GO:0003007; GO:0003779; GO:0005912; GO:0005916; GO:0007219; GO:0008104; GO:0008285; GO:0014704; GO:0014835; GO:0014901; GO:0030057; GO:0031005; GO:0042391; GO:0045214; GO:0055013			cellular organisms (no rank), Eukaryota (superkingdom), Opisthokonta (clade), Metazoa (kingdom), Eumetazoa (clade), Bilateria (clade), Deuterostomia (clade), Chordata (phylum), Craniata (subphylum), Vertebrata (clade), Gnathostomata (clade), Teleostomi (clade), Euteleostomi (clade), Sarcopterygii (superclass), Dipnotetrapodomorpha (clade), Tetrapoda (clade), Amniota (clade), Mammalia (class), The…	131567 (no rank), 2759 (superkingdom), 33154 (clade), 33208 (kingdom), 6072 (clade), 33213 (clade), 33511 (clade), 7711 (phylum), 89593 (subphylum), 7742 (clade), 7776 (clade), 117570 (clade), 117571 (clade), 8287 (superclass), 1338369 (clade), 32523 (clade), 32524 (clade), 40674 (class), 32525 (clade), 9347 (clade), 1437010 (clade), 314146 (superorder), 314147 (clade), 9989 (order), 1963758 (sub…			SUBUNIT: Interacts (via N-terminus) with CTTN; the interaction promotes CTTN localization to intercalated disks in cardiomyocytes (PubMed:23296090). Interacts with CTNNB1 (PubMed:17925400). Interacts with FLNC and VASP (By similarity). Interacts with F-actin (PubMed:17925400). {ECO:0000250|UniProtKB:Q702N8, ECO:0000269|PubMed:17925400, ECO:0000269|PubMed:23296090}.
O70548	1.59149	24.0159	7.23172	6.70131e-05	0.00333636	2.08691	reviewed	TELT_MOUSE	Telethonin (Titin cap protein)	Tcap	167	adult heart development [GO:0007512]; cardiac muscle contraction [GO:0060048]; cardiac muscle hypertrophy in response to stress [GO:0014898]; cardiac muscle tissue morphogenesis [GO:0055008]; cardiac myofibril assembly [GO:0055003]; detection of muscle stretch [GO:0035995]; otic vesicle formation [GO:0030916]; sarcomere organization [GO:0045214]; sarcomerogenesis [GO:0048769]; skeletal muscle con…	I band [GO:0031674]; Z disc [GO:0030018]	BMP binding [GO:0036122]; FATZ binding [GO:0051373]; protein-macromolecule adaptor activity [GO:0030674]; structural constituent of muscle [GO:0008307]; titin binding [GO:0031432]; titin Z domain binding [GO:0070080]; transmembrane transporter binding [GO:0044325]	I band [GO:0031674]; Z disc [GO:0030018]; BMP binding [GO:0036122]; FATZ binding [GO:0051373]; protein-macromolecule adaptor activity [GO:0030674]; structural constituent of muscle [GO:0008307]; titin binding [GO:0031432]; titin Z domain binding [GO:0070080]; transmembrane transporter binding [GO:0044325]; adult heart development [GO:0007512]; cardiac muscle contraction [GO:0060048]; cardiac musc…	GO:0001756; GO:0003009; GO:0007512; GO:0008307; GO:0014898; GO:0030018; GO:0030240; GO:0030241; GO:0030674; GO:0030916; GO:0031432; GO:0031674; GO:0035995; GO:0036122; GO:0044325; GO:0045214; GO:0048769; GO:0051373; GO:0055003; GO:0055008; GO:0060048; GO:0070080			cellular organisms (no rank), Eukaryota (superkingdom), Opisthokonta (clade), Metazoa (kingdom), Eumetazoa (clade), Bilateria (clade), Deuterostomia (clade), Chordata (phylum), Craniata (subphylum), Vertebrata (clade), Gnathostomata (clade), Teleostomi (clade), Euteleostomi (clade), Sarcopterygii (superclass), Dipnotetrapodomorpha (clade), Tetrapoda (clade), Amniota (clade), Mammalia (class), The…	131567 (no rank), 2759 (superkingdom), 33154 (clade), 33208 (kingdom), 6072 (clade), 33213 (clade), 33511 (clade), 7711 (phylum), 89593 (subphylum), 7742 (clade), 7776 (clade), 117570 (clade), 117571 (clade), 8287 (superclass), 1338369 (clade), 32523 (clade), 32524 (clade), 40674 (class), 32525 (clade), 9347 (clade), 1437010 (clade), 314146 (superorder), 314147 (clade), 9989 (order), 1963758 (sub…			SUBUNIT: Interacts with MYOZ1, MYOZ2 and MYOZ3. Interacts with CSRP3. Interacts directly with the N-terminal Ig-like domains of 2 titin (TTN) molecules. Interacts with ANKRD2; the interaction is direct (By similarity). {ECO:0000250}.
O88342	0.838349	24.4878	3.6178	0.00617949	0.0439451	-2.65549	reviewed	WDR1_MOUSE	WD repeat-containing protein 1 (Actin-interacting protein 1) (AIP1)	Wdr1	606	actin cytoskeleton organization [GO:0030036]; actin filament fragmentation [GO:0030043]; apical junction assembly [GO:0043297]; cortical cytoskeleton organization [GO:0030865]; establishment of planar polarity of follicular epithelium [GO:0042247]; maintenance of epithelial cell apical/basal polarity [GO:0045199]; neutrophil mediated immunity [GO:0002446]; neutrophil migration [GO:1990266]; plate…	actin cytoskeleton [GO:0015629]; cell projection [GO:0042995]; cell-cell junction [GO:0005911]; cytosol [GO:0005829]; glutamatergic synapse [GO:0098978]; myelin sheath [GO:0043209]; plasma membrane [GO:0005886]; podosome [GO:0002102]; synapse [GO:0045202]	actin binding [GO:0003779]; actin filament binding [GO:0051015]	actin cytoskeleton [GO:0015629]; cell projection [GO:0042995]; cell-cell junction [GO:0005911]; cytosol [GO:0005829]; glutamatergic synapse [GO:0098978]; myelin sheath [GO:0043209]; plasma membrane [GO:0005886]; podosome [GO:0002102]; synapse [GO:0045202]; actin binding [GO:0003779]; actin filament binding [GO:0051015]; actin cytoskeleton organization [GO:0030036]; actin filament fragmentation [G…	GO:0002102; GO:0002446; GO:0003779; GO:0005829; GO:0005886; GO:0005911; GO:0007605; GO:0008360; GO:0015629; GO:0030036; GO:0030043; GO:0030220; GO:0030836; GO:0030865; GO:0042247; GO:0042995; GO:0043209; GO:0043297; GO:0045199; GO:0045202; GO:0045214; GO:0048713; GO:0051015; GO:0060307; GO:0098978; GO:1990266			cellular organisms (no rank), Eukaryota (superkingdom), Opisthokonta (clade), Metazoa (kingdom), Eumetazoa (clade), Bilateria (clade), Deuterostomia (clade), Chordata (phylum), Craniata (subphylum), Vertebrata (clade), Gnathostomata (clade), Teleostomi (clade), Euteleostomi (clade), Sarcopterygii (superclass), Dipnotetrapodomorpha (clade), Tetrapoda (clade), Amniota (clade), Mammalia (class), The…	131567 (no rank), 2759 (superkingdom), 33154 (clade), 33208 (kingdom), 6072 (clade), 33213 (clade), 33511 (clade), 7711 (phylum), 89593 (subphylum), 7742 (clade), 7776 (clade), 117570 (clade), 117571 (clade), 8287 (superclass), 1338369 (clade), 32523 (clade), 32524 (clade), 40674 (class), 32525 (clade), 9347 (clade), 1437010 (clade), 314146 (superorder), 314147 (clade), 9989 (order), 1963758 (sub…
O88346	1.0151	24.2114	4.82541	0.00111531	0.0195664	-0.865004	reviewed	TNNT1_MOUSE	Troponin T, slow skeletal muscle (TnTs) (Slow skeletal muscle troponin T) (sTnT)	Tnnt1	262	negative regulation of muscle contraction [GO:0045932]; slow-twitch skeletal muscle fiber contraction [GO:0031444]; transition between fast and slow fiber [GO:0014883]	troponin complex [GO:0005861]	tropomyosin binding [GO:0005523]; troponin T binding [GO:0031014]	troponin complex [GO:0005861]; tropomyosin binding [GO:0005523]; troponin T binding [GO:0031014]; negative regulation of muscle contraction [GO:0045932]; slow-twitch skeletal muscle fiber contraction [GO:0031444]; transition between fast and slow fiber [GO:0014883]	GO:0005523; GO:0005861; GO:0014883; GO:0031014; GO:0031444; GO:0045932			cellular organisms (no rank), Eukaryota (superkingdom), Opisthokonta (clade), Metazoa (kingdom), Eumetazoa (clade), Bilateria (clade), Deuterostomia (clade), Chordata (phylum), Craniata (subphylum), Vertebrata (clade), Gnathostomata (clade), Teleostomi (clade), Euteleostomi (clade), Sarcopterygii (superclass), Dipnotetrapodomorpha (clade), Tetrapoda (clade), Amniota (clade), Mammalia (class), The…	131567 (no rank), 2759 (superkingdom), 33154 (clade), 33208 (kingdom), 6072 (clade), 33213 (clade), 33511 (clade), 7711 (phylum), 89593 (subphylum), 7742 (clade), 7776 (clade), 117570 (clade), 117571 (clade), 8287 (superclass), 1338369 (clade), 32523 (clade), 32524 (clade), 40674 (class), 32525 (clade), 9347 (clade), 1437010 (clade), 314146 (superorder), 314147 (clade), 9989 (order), 1963758 (sub…			SUBUNIT: Interacts with TPM3. {ECO:0000250|UniProtKB:P13805}.
P00405	-1.03283	26.2366	-3.81526	0.00460482	0.039958	-2.34986	reviewed	COX2_MOUSE	Cytochrome c oxidase subunit 2 (EC 7.1.1.9) (Cytochrome c oxidase polypeptide II)	Mtco2 COII COX2 mt-Co2	227	electron transport chain [GO:0022900]; lactation [GO:0007595]; response to hypoxia [GO:0001666]	mitochondrial inner membrane [GO:0005743]; mitochondrion [GO:0005739]; respiratory chain complex IV [GO:0045277]	copper ion binding [GO:0005507]; cytochrome-c oxidase activity [GO:0004129]	mitochondrial inner membrane [GO:0005743]; mitochondrion [GO:0005739]; respiratory chain complex IV [GO:0045277]; copper ion binding [GO:0005507]; cytochrome-c oxidase activity [GO:0004129]; electron transport chain [GO:0022900]; lactation [GO:0007595]; response to hypoxia [GO:0001666]	GO:0001666; GO:0004129; GO:0005507; GO:0005739; GO:0005743; GO:0007595; GO:0022900; GO:0045277		BINDING 161; /ligand=Cu cation; /ligand_id=ChEBI:CHEBI:23378; /ligand_label=A1; /evidence=ECO:0000269|PubMed:34616041, ECO:0007744|PDB:7O37, ECO:0007744|PDB:7O3C; BINDING 196; /ligand=Cu cation; /ligand_id=ChEBI:CHEBI:23378; /ligand_label=A1; /evidence=ECO:0000269|PubMed:34616041, ECO:0007744|PDB:7O37, ECO:0007744|PDB:7O3C; BINDING 196; /ligand=Cu cation; /ligand_id=ChEBI:CHEBI:23378; /ligand_lab…	cellular organisms (no rank), Eukaryota (superkingdom), Opisthokonta (clade), Metazoa (kingdom), Eumetazoa (clade), Bilateria (clade), Deuterostomia (clade), Chordata (phylum), Craniata (subphylum), Vertebrata (clade), Gnathostomata (clade), Teleostomi (clade), Euteleostomi (clade), Sarcopterygii (superclass), Dipnotetrapodomorpha (clade), Tetrapoda (clade), Amniota (clade), Mammalia (class), The…	131567 (no rank), 2759 (superkingdom), 33154 (clade), 33208 (kingdom), 6072 (clade), 33213 (clade), 33511 (clade), 7711 (phylum), 89593 (subphylum), 7742 (clade), 7776 (clade), 117570 (clade), 117571 (clade), 8287 (superclass), 1338369 (clade), 32523 (clade), 32524 (clade), 40674 (class), 32525 (clade), 9347 (clade), 1437010 (clade), 314146 (superorder), 314147 (clade), 9989 (order), 1963758 (sub…			SUBUNIT: Component of the cytochrome c oxidase (complex IV, CIV), a multisubunit enzyme composed of 14 subunits (PubMed:34616041, PubMed:38575788). The complex is composed of a catalytic core of 3 subunits MT-CO1, MT-CO2 and MT-CO3, encoded in the mitochondrial DNA, and 11 supernumerary subunits COX4I, COX5A, COX5B, COX6A, COX6B, COX6C, COX7A, COX7B, COX7C, COX8 and NDUFA4, which are encoded in t…
P02468	0.854586	25.9776	5.98785	0.000261377	0.00781228	0.661246	reviewed	LAMC1_MOUSE	Laminin subunit gamma-1 (Laminin B2 chain) (Laminin-1 subunit gamma) (Laminin-10 subunit gamma) (Laminin-11 subunit gamma) (Laminin-2 subunit gamma) (Laminin-3 subunit gamma) (Laminin-4 subunit gamma) (Laminin-6 subunit gamma) (Laminin-7 subunit gamma) (Laminin-8 subunit gamma) (Laminin-9 subunit gamma) (S-laminin subunit gamma) (S-LAM gamma)	Lamc1 Lamb-2 Lamc-1	1607	cell adhesion [GO:0007155]; cell migration [GO:0016477]; chromatin organization [GO:0006325]; extracellular matrix disassembly [GO:0022617]; gene expression [GO:0010467]; hair cell differentiation [GO:0035315]; hair follicle cell proliferation [GO:0071335]; hair follicle morphogenesis [GO:0031069]; hemidesmosome assembly [GO:0031581]; neuron projection development [GO:0031175]; positive regulatio…	basement membrane [GO:0005604]; collagen-containing extracellular matrix [GO:0062023]; extracellular region [GO:0005576]; laminin-10 complex [GO:0043259]; neuromuscular junction [GO:0031594]; protein complex involved in cell-matrix adhesion [GO:0098637]; synaptic cleft [GO:0043083]	extracellular matrix structural constituent [GO:0005201]; glycosphingolipid binding [GO:0043208]	basement membrane [GO:0005604]; collagen-containing extracellular matrix [GO:0062023]; extracellular region [GO:0005576]; laminin-10 complex [GO:0043259]; neuromuscular junction [GO:0031594]; protein complex involved in cell-matrix adhesion [GO:0098637]; synaptic cleft [GO:0043083]; extracellular matrix structural constituent [GO:0005201]; glycosphingolipid binding [GO:0043208]; cell adhesion [GO…	GO:0005201; GO:0005576; GO:0005604; GO:0006325; GO:0007155; GO:0010467; GO:0016477; GO:0022617; GO:0031069; GO:0031175; GO:0031581; GO:0031594; GO:0035315; GO:0043083; GO:0043208; GO:0043259; GO:0045785; GO:0048729; GO:0051149; GO:0062023; GO:0065003; GO:0071335; GO:0098637; GO:0110011; GO:2001046			cellular organisms (no rank), Eukaryota (superkingdom), Opisthokonta (clade), Metazoa (kingdom), Eumetazoa (clade), Bilateria (clade), Deuterostomia (clade), Chordata (phylum), Craniata (subphylum), Vertebrata (clade), Gnathostomata (clade), Teleostomi (clade), Euteleostomi (clade), Sarcopterygii (superclass), Dipnotetrapodomorpha (clade), Tetrapoda (clade), Amniota (clade), Mammalia (class), The…	131567 (no rank), 2759 (superkingdom), 33154 (clade), 33208 (kingdom), 6072 (clade), 33213 (clade), 33511 (clade), 7711 (phylum), 89593 (subphylum), 7742 (clade), 7776 (clade), 117570 (clade), 117571 (clade), 8287 (superclass), 1338369 (clade), 32523 (clade), 32524 (clade), 40674 (class), 32525 (clade), 9347 (clade), 1437010 (clade), 314146 (superorder), 314147 (clade), 9989 (order), 1963758 (sub…		P02469; P10493; Q9JI33	SUBUNIT: Laminin is a complex glycoprotein, consisting of three different polypeptide chains (alpha, beta, gamma), which are bound to each other by disulfide bonds into a cross-shaped molecule comprising one long and three short arms with globules at each end. Gamma-1 is a subunit of laminin-1 (laminin-111 or EHS laminin), laminin-2 (laminin-211 or merosin), laminin-3 (laminin-121 or S-laminin), …
P02469	0.789281	24.16	5.18921	0.000694061	0.0143617	-0.366083	reviewed	LAMB1_MOUSE	Laminin subunit beta-1 (Laminin B1 chain) (Laminin-1 subunit beta) (Laminin-10 subunit beta) (Laminin-12 subunit beta) (Laminin-2 subunit beta) (Laminin-6 subunit beta) (Laminin-8 subunit beta)	Lamb1 Lamb-1 Lamb1-1	1786	cell adhesion [GO:0007155]; cell migration [GO:0016477]; embryo implantation [GO:0007566]; learning or memory [GO:0007611]; negative regulation of cell adhesion [GO:0007162]; neuron projection development [GO:0031175]; odontogenesis [GO:0042476]; positive regulation of cell adhesion [GO:0045785]; positive regulation of cell migration [GO:0030335]; positive regulation of integrin-mediated signalin…	basement membrane [GO:0005604]; collagen-containing extracellular matrix [GO:0062023]; extracellular matrix [GO:0031012]; extracellular region [GO:0005576]; laminin complex [GO:0043256]; laminin-1 complex [GO:0005606]; laminin-10 complex [GO:0043259]; laminin-2 complex [GO:0005607]; laminin-8 complex [GO:0043257]; nucleus [GO:0005634]; perinuclear region of cytoplasm [GO:0048471]; protein complex…	enzyme binding [GO:0019899]; extracellular matrix structural constituent [GO:0005201]; glycosphingolipid binding [GO:0043208]; integrin binding [GO:0005178]	basement membrane [GO:0005604]; collagen-containing extracellular matrix [GO:0062023]; extracellular matrix [GO:0031012]; extracellular region [GO:0005576]; laminin complex [GO:0043256]; laminin-1 complex [GO:0005606]; laminin-10 complex [GO:0043259]; laminin-2 complex [GO:0005607]; laminin-8 complex [GO:0043257]; nucleus [GO:0005634]; perinuclear region of cytoplasm [GO:0048471]; protein complex…	GO:0005178; GO:0005201; GO:0005576; GO:0005604; GO:0005606; GO:0005607; GO:0005634; GO:0007155; GO:0007162; GO:0007566; GO:0007611; GO:0016477; GO:0019899; GO:0030335; GO:0031012; GO:0031175; GO:0042476; GO:0043208; GO:0043256; GO:0043257; GO:0043259; GO:0045785; GO:0048471; GO:0051149; GO:0062023; GO:0098637; GO:0110011; GO:2001046			cellular organisms (no rank), Eukaryota (superkingdom), Opisthokonta (clade), Metazoa (kingdom), Eumetazoa (clade), Bilateria (clade), Deuterostomia (clade), Chordata (phylum), Craniata (subphylum), Vertebrata (clade), Gnathostomata (clade), Teleostomi (clade), Euteleostomi (clade), Sarcopterygii (superclass), Dipnotetrapodomorpha (clade), Tetrapoda (clade), Amniota (clade), Mammalia (class), The…	131567 (no rank), 2759 (superkingdom), 33154 (clade), 33208 (kingdom), 6072 (clade), 33213 (clade), 33511 (clade), 7711 (phylum), 89593 (subphylum), 7742 (clade), 7776 (clade), 117570 (clade), 117571 (clade), 8287 (superclass), 1338369 (clade), 32523 (clade), 32524 (clade), 40674 (class), 32525 (clade), 9347 (clade), 1437010 (clade), 314146 (superorder), 314147 (clade), 9989 (order), 1963758 (sub…		P02468; P31696	SUBUNIT: Laminin is a complex glycoprotein, consisting of three different polypeptide chains (alpha, beta, gamma), which are bound to each other by disulfide bonds into a cross-shaped molecule comprising one long and three short arms with globules at each end. Beta-1 is a subunit of laminin-1 (laminin-111 or EHS laminin), laminin-2 (laminin-211 or merosin), laminin-6 (laminin-311 or K-laminin), l…
P03921	-1.5816	22.4561	-6.70063	0.000117203	0.00472913	1.50277	reviewed	NU5M_MOUSE	NADH-ubiquinone oxidoreductase chain 5 (EC 7.1.1.2) (NADH dehydrogenase subunit 5)	Mtnd5 mt-Nd5 Nd5	607	aerobic respiration [GO:0009060]; mitochondrial electron transport, NADH to ubiquinone [GO:0006120]; mitochondrial respiratory chain complex I assembly [GO:0032981]; proton motive force-driven mitochondrial ATP synthesis [GO:0042776]; response to hydrogen peroxide [GO:0042542]; response to hypoxia [GO:0001666]	mitochondrial inner membrane [GO:0005743]; mitochondrion [GO:0005739]; respiratory chain complex I [GO:0045271]	NADH dehydrogenase (ubiquinone) activity [GO:0008137]	mitochondrial inner membrane [GO:0005743]; mitochondrion [GO:0005739]; respiratory chain complex I [GO:0045271]; NADH dehydrogenase (ubiquinone) activity [GO:0008137]; aerobic respiration [GO:0009060]; mitochondrial electron transport, NADH to ubiquinone [GO:0006120]; mitochondrial respiratory chain complex I assembly [GO:0032981]; proton motive force-driven mitochondrial ATP synthesis [GO:004277…	GO:0001666; GO:0005739; GO:0005743; GO:0006120; GO:0008137; GO:0009060; GO:0032981; GO:0042542; GO:0042776; GO:0045271			cellular organisms (no rank), Eukaryota (superkingdom), Opisthokonta (clade), Metazoa (kingdom), Eumetazoa (clade), Bilateria (clade), Deuterostomia (clade), Chordata (phylum), Craniata (subphylum), Vertebrata (clade), Gnathostomata (clade), Teleostomi (clade), Euteleostomi (clade), Sarcopterygii (superclass), Dipnotetrapodomorpha (clade), Tetrapoda (clade), Amniota (clade), Mammalia (class), The…	131567 (no rank), 2759 (superkingdom), 33154 (clade), 33208 (kingdom), 6072 (clade), 33213 (clade), 33511 (clade), 7711 (phylum), 89593 (subphylum), 7742 (clade), 7776 (clade), 117570 (clade), 117571 (clade), 8287 (superclass), 1338369 (clade), 32523 (clade), 32524 (clade), 40674 (class), 32525 (clade), 9347 (clade), 1437010 (clade), 314146 (superorder), 314147 (clade), 9989 (order), 1963758 (sub…			SUBUNIT: Core subunit of respiratory chain NADH dehydrogenase (Complex I) which is composed of 45 different subunits. {ECO:0000269|PubMed:38575788}.
P03930	-1.07189	24.0922	-6.40099	0.000162964	0.00547967	1.15732	reviewed	ATP8_MOUSE	ATP synthase F(0) complex subunit 8 (A6L) (F-ATPase subunit 8)	Mtatp8 Atp8 mt-Atp8	67	proton motive force-driven ATP synthesis [GO:0015986]	mitochondrial membrane [GO:0031966]; mitochondrion [GO:0005739]; proton-transporting ATP synthase complex [GO:0045259]; proton-transporting ATP synthase complex, coupling factor F(o) [GO:0045263]	proton transmembrane transporter activity [GO:0015078]	mitochondrial membrane [GO:0031966]; mitochondrion [GO:0005739]; proton-transporting ATP synthase complex [GO:0045259]; proton-transporting ATP synthase complex, coupling factor F(o) [GO:0045263]; proton transmembrane transporter activity [GO:0015078]; proton motive force-driven ATP synthesis [GO:0015986]	GO:0005739; GO:0015078; GO:0015986; GO:0031966; GO:0045259; GO:0045263			cellular organisms (no rank), Eukaryota (superkingdom), Opisthokonta (clade), Metazoa (kingdom), Eumetazoa (clade), Bilateria (clade), Deuterostomia (clade), Chordata (phylum), Craniata (subphylum), Vertebrata (clade), Gnathostomata (clade), Teleostomi (clade), Euteleostomi (clade), Sarcopterygii (superclass), Dipnotetrapodomorpha (clade), Tetrapoda (clade), Amniota (clade), Mammalia (class), The…	131567 (no rank), 2759 (superkingdom), 33154 (clade), 33208 (kingdom), 6072 (clade), 33213 (clade), 33511 (clade), 7711 (phylum), 89593 (subphylum), 7742 (clade), 7776 (clade), 117570 (clade), 117571 (clade), 8287 (superclass), 1338369 (clade), 32523 (clade), 32524 (clade), 40674 (class), 32525 (clade), 9347 (clade), 1437010 (clade), 314146 (superorder), 314147 (clade), 9989 (order), 1963758 (sub…			SUBUNIT: Component of the ATP synthase complex composed at least of ATP5F1A/subunit alpha, ATP5F1B/subunit beta, ATP5MC1/subunit c (homooctomer), MT-ATP6/subunit a, MT-ATP8/subunit 8, ATP5ME/subunit e, ATP5MF/subunit f, ATP5MG/subunit g, ATP5MK/subunit k, ATP5MJ/subunit j, ATP5F1C/subunit gamma, ATP5F1D/subunit delta, ATP5F1E/subunit epsilon, ATP5PF/subunit F6, ATP5PB/subunit b, ATP5PD/subunit d,…
P08122	0.66751	24.4407	4.0393	0.00331974	0.0339118	-2.00864	reviewed	CO4A2_MOUSE	Collagen alpha-2(IV) chain [Cleaved into: Canstatin]	Col4a2	1707	angiogenesis [GO:0001525]; cellular response to transforming growth factor beta stimulus [GO:0071560]; collagen-activated tyrosine kinase receptor signaling pathway [GO:0038063]; DNA-templated transcription [GO:0006351]; endodermal cell differentiation [GO:0035987]; negative regulation of angiogenesis [GO:0016525]; response to activity [GO:0014823]	basement membrane [GO:0005604]; collagen type IV trimer [GO:0005587]; collagen-containing extracellular matrix [GO:0062023]; extracellular region [GO:0005576]; extracellular space [GO:0005615]	extracellular matrix structural constituent [GO:0005201]	basement membrane [GO:0005604]; collagen type IV trimer [GO:0005587]; collagen-containing extracellular matrix [GO:0062023]; extracellular region [GO:0005576]; extracellular space [GO:0005615]; extracellular matrix structural constituent [GO:0005201]; angiogenesis [GO:0001525]; cellular response to transforming growth factor beta stimulus [GO:0071560]; collagen-activated tyrosine kinase receptor …	GO:0001525; GO:0005201; GO:0005576; GO:0005587; GO:0005604; GO:0005615; GO:0006351; GO:0014823; GO:0016525; GO:0035987; GO:0038063; GO:0062023; GO:0071560			cellular organisms (no rank), Eukaryota (superkingdom), Opisthokonta (clade), Metazoa (kingdom), Eumetazoa (clade), Bilateria (clade), Deuterostomia (clade), Chordata (phylum), Craniata (subphylum), Vertebrata (clade), Gnathostomata (clade), Teleostomi (clade), Euteleostomi (clade), Sarcopterygii (superclass), Dipnotetrapodomorpha (clade), Tetrapoda (clade), Amniota (clade), Mammalia (class), The…	131567 (no rank), 2759 (superkingdom), 33154 (clade), 33208 (kingdom), 6072 (clade), 33213 (clade), 33511 (clade), 7711 (phylum), 89593 (subphylum), 7742 (clade), 7776 (clade), 117570 (clade), 117571 (clade), 8287 (superclass), 1338369 (clade), 32523 (clade), 32524 (clade), 40674 (class), 32525 (clade), 9347 (clade), 1437010 (clade), 314146 (superorder), 314147 (clade), 9989 (order), 1963758 (sub…	PTM: Prolines at the third position of the tripeptide repeating unit (G-X-Y) are hydroxylated in some or all of the chains.; PTM: Type IV collagens contain numerous cysteine residues which are involved in inter- and intramolecular disulfide bonding. 12 of these, located in the NC1 domain, are conserved in all known type IV collagens.; PTM: Proteolytic processing produces the C-terminal NC1 peptid…		SUBUNIT: There are six type IV collagen isoforms, alpha 1(IV)-alpha 6(IV), each of which can form a triple helix structure with 2 other chains to generate type IV collagen network. Interacts with EFEMP2 (PubMed:17324935). {ECO:0000269|PubMed:17324935}.
P09405	1.0941	22.2056	3.76919	0.00492959	0.0405937	-2.42078	reviewed	NUCL_MOUSE	Nucleolin (Protein C23)	Ncl Nuc	707	angiogenesis [GO:0001525]; cellular response to epidermal growth factor stimulus [GO:0071364]; cellular response to leukemia inhibitory factor [GO:1990830]; negative regulation of insulin receptor signaling pathway [GO:0046627]; negative regulation of translation [GO:0017148]; positive regulation of transcription by RNA polymerase II [GO:0045944]; positive regulation of transcription of nucleolar…	cell cortex [GO:0005938]; chromosome [GO:0005694]; cornified envelope [GO:0001533]; cytoplasmic ribonucleoprotein granule [GO:0036464]; nucleolus [GO:0005730]; nucleoplasm [GO:0005654]; nucleus [GO:0005634]; ribonucleoprotein complex [GO:1990904]	DNA topoisomerase binding [GO:0044547]; identical protein binding [GO:0042802]; insulin receptor substrate binding [GO:0043560]; mRNA 5'-UTR binding [GO:0048027]; PH domain binding [GO:0042731]; RNA binding [GO:0003723]; telomeric DNA binding [GO:0042162]	cell cortex [GO:0005938]; chromosome [GO:0005694]; cornified envelope [GO:0001533]; cytoplasmic ribonucleoprotein granule [GO:0036464]; nucleolus [GO:0005730]; nucleoplasm [GO:0005654]; nucleus [GO:0005634]; ribonucleoprotein complex [GO:1990904]; DNA topoisomerase binding [GO:0044547]; identical protein binding [GO:0042802]; insulin receptor substrate binding [GO:0043560]; mRNA 5'-UTR binding [G…	GO:0001525; GO:0001533; GO:0003723; GO:0005634; GO:0005654; GO:0005694; GO:0005730; GO:0005938; GO:0017148; GO:0036464; GO:0042162; GO:0042731; GO:0042802; GO:0043560; GO:0044547; GO:0045944; GO:0046627; GO:0048027; GO:0071364; GO:1901838; GO:1990830; GO:1990904			cellular organisms (no rank), Eukaryota (superkingdom), Opisthokonta (clade), Metazoa (kingdom), Eumetazoa (clade), Bilateria (clade), Deuterostomia (clade), Chordata (phylum), Craniata (subphylum), Vertebrata (clade), Gnathostomata (clade), Teleostomi (clade), Euteleostomi (clade), Sarcopterygii (superclass), Dipnotetrapodomorpha (clade), Tetrapoda (clade), Amniota (clade), Mammalia (class), The…	131567 (no rank), 2759 (superkingdom), 33154 (clade), 33208 (kingdom), 6072 (clade), 33213 (clade), 33511 (clade), 7711 (phylum), 89593 (subphylum), 7742 (clade), 7776 (clade), 117570 (clade), 117571 (clade), 8287 (superclass), 1338369 (clade), 32523 (clade), 32524 (clade), 40674 (class), 32525 (clade), 9347 (clade), 1437010 (clade), 314146 (superorder), 314147 (clade), 9989 (order), 1963758 (sub…	PTM: Some glutamate residues are glycylated by TTLL8. This modification occurs exclusively on glutamate residues and results in a glycine chain on the gamma-carboxyl group.; PTM: Symmetrically methylated by PRMT5. {ECO:0000250|UniProtKB:P19338}.	Q9CR42; Q9DC51; P63028	SUBUNIT: Identified in a IGF2BP1-dependent mRNP granule complex containing untranslated mRNAs (By similarity). Component of the SWAP complex that consists of NPM1, NCL/nucleolin, PARP1 and SWAP70 (PubMed:9642267). Component of a complex which is at least composed of HTATSF1/Tat-SF1, the P-TEFb complex components CDK9 and CCNT1, RNA polymerase II, SUPT5H, and NCL/nucleolin (By similarity). Interac…
P09541	1.77124	22.4144	3.92754	0.0039049	0.036481	-2.17808	reviewed	MYL4_MOUSE	Myosin light chain 4 (MLC1EMB) (Myosin light chain 1, atrial/fetal isoform) (MLC1A)	Myl4 Mlc1a Myla	193		myosin complex [GO:0016459]	calcium ion binding [GO:0005509]	myosin complex [GO:0016459]; calcium ion binding [GO:0005509]	GO:0005509; GO:0016459			cellular organisms (no rank), Eukaryota (superkingdom), Opisthokonta (clade), Metazoa (kingdom), Eumetazoa (clade), Bilateria (clade), Deuterostomia (clade), Chordata (phylum), Craniata (subphylum), Vertebrata (clade), Gnathostomata (clade), Teleostomi (clade), Euteleostomi (clade), Sarcopterygii (superclass), Dipnotetrapodomorpha (clade), Tetrapoda (clade), Amniota (clade), Mammalia (class), The…	131567 (no rank), 2759 (superkingdom), 33154 (clade), 33208 (kingdom), 6072 (clade), 33213 (clade), 33511 (clade), 7711 (phylum), 89593 (subphylum), 7742 (clade), 7776 (clade), 117570 (clade), 117571 (clade), 8287 (superclass), 1338369 (clade), 32523 (clade), 32524 (clade), 40674 (class), 32525 (clade), 9347 (clade), 1437010 (clade), 314146 (superorder), 314147 (clade), 9989 (order), 1963758 (sub…			SUBUNIT: Myosin is a hexamer of 2 heavy chains and 4 light chains.
P09671	-0.862023	24.9772	-3.43637	0.00813332	0.0486192	-2.93982	reviewed	SODM_MOUSE	Superoxide dismutase [Mn], mitochondrial (EC 1.15.1.1)	Sod2 Sod-2	222	acetylcholine-mediated vasodilation involved in regulation of systemic arterial blood pressure [GO:0003069]; apoptotic mitochondrial changes [GO:0008637]; cellular response to ethanol [GO:0071361]; cellular response to oxidative stress [GO:0034599]; detection of oxygen [GO:0003032]; erythrophore differentiation [GO:0048773]; glutathione metabolic process [GO:0006749]; heart development [GO:000750…	mitochondrial inner membrane [GO:0005743]; mitochondrial nucleoid [GO:0042645]; mitochondrion [GO:0005739]; myelin sheath [GO:0043209]	DNA binding [GO:0003677]; enzyme binding [GO:0019899]; identical protein binding [GO:0042802]; manganese ion binding [GO:0030145]; oxidoreductase activity [GO:0016491]; oxygen binding [GO:0019825]; superoxide dismutase activity [GO:0004784]	mitochondrial inner membrane [GO:0005743]; mitochondrial nucleoid [GO:0042645]; mitochondrion [GO:0005739]; myelin sheath [GO:0043209]; DNA binding [GO:0003677]; enzyme binding [GO:0019899]; identical protein binding [GO:0042802]; manganese ion binding [GO:0030145]; oxidoreductase activity [GO:0016491]; oxygen binding [GO:0019825]; superoxide dismutase activity [GO:0004784]; acetylcholine-mediate…	GO:0000302; GO:0000303; GO:0001666; GO:0001836; GO:0001889; GO:0003032; GO:0003069; GO:0003677; GO:0004784; GO:0005739; GO:0005743; GO:0006357; GO:0006749; GO:0006801; GO:0006979; GO:0007005; GO:0007507; GO:0007626; GO:0008217; GO:0008630; GO:0008631; GO:0008637; GO:0009410; GO:0009791; GO:0010042; GO:0010043; GO:0010269; GO:0010332; GO:0010729; GO:0014823; GO:0016491; GO:0019430; GO:0019825; GO:…		BINDING 50; /ligand=Mn(2+); /ligand_id=ChEBI:CHEBI:29035; /evidence=ECO:0000250; BINDING 98; /ligand=Mn(2+); /ligand_id=ChEBI:CHEBI:29035; /evidence=ECO:0000250; BINDING 183; /ligand=Mn(2+); /ligand_id=ChEBI:CHEBI:29035; /evidence=ECO:0000250; BINDING 187; /ligand=Mn(2+); /ligand_id=ChEBI:CHEBI:29035; /evidence=ECO:0000250	cellular organisms (no rank), Eukaryota (superkingdom), Opisthokonta (clade), Metazoa (kingdom), Eumetazoa (clade), Bilateria (clade), Deuterostomia (clade), Chordata (phylum), Craniata (subphylum), Vertebrata (clade), Gnathostomata (clade), Teleostomi (clade), Euteleostomi (clade), Sarcopterygii (superclass), Dipnotetrapodomorpha (clade), Tetrapoda (clade), Amniota (clade), Mammalia (class), The…	131567 (no rank), 2759 (superkingdom), 33154 (clade), 33208 (kingdom), 6072 (clade), 33213 (clade), 33511 (clade), 7711 (phylum), 89593 (subphylum), 7742 (clade), 7776 (clade), 117570 (clade), 117571 (clade), 8287 (superclass), 1338369 (clade), 32523 (clade), 32524 (clade), 40674 (class), 32525 (clade), 9347 (clade), 1437010 (clade), 314146 (superorder), 314147 (clade), 9989 (order), 1963758 (sub…	PTM: Nitrated under oxidative stress. Nitration coupled with oxidation inhibits the catalytic activity (By similarity). {ECO:0000250|UniProtKB:P04179}.; PTM: Acetylation at Lys-122 decreases enzymatic activity. Deacetylated by SIRT3 upon exposure to ionizing radiations or after long fasting. {ECO:0000269|PubMed:21172655}.; PTM: Polyubiquitinated; leading to proteasomal degradation. Deubiquitinate…	P54099; P02340	SUBUNIT: Homotetramer.
P10107	1.57327	22.3007	3.64344	0.00594615	0.0437403	-2.61556	reviewed	ANXA1_MOUSE	Annexin A1 (Annexin I) (Annexin-1) (Calpactin II) (Calpactin-2) (Chromobindin-9) (Lipocortin I) (Phospholipase A2 inhibitory protein) (p35) [Cleaved into: Annexin Ac2-26]	Anxa1 Anx1 Lpc-1 Lpc1	346	actin cytoskeleton organization [GO:0030036]; adaptive immune response [GO:0002250]; alpha-beta T cell differentiation [GO:0046632]; arachidonate secretion [GO:0050482]; cellular response to glucocorticoid stimulus [GO:0071385]; cellular response to vascular endothelial growth factor stimulus [GO:0035924]; G protein-coupled receptor signaling pathway, coupled to cyclic nucleotide second messenger…	actin filament [GO:0005884]; apical plasma membrane [GO:0016324]; basolateral plasma membrane [GO:0016323]; cell surface [GO:0009986]; collagen-containing extracellular matrix [GO:0062023]; cornified envelope [GO:0001533]; cytoplasm [GO:0005737]; cytosol [GO:0005829]; early endosome membrane [GO:0031901]; extracellular exosome [GO:0070062]; extracellular space [GO:0005615]; lateral plasma membran…	calcium ion binding [GO:0005509]; calcium-dependent phospholipid binding [GO:0005544]; calcium-dependent protein binding [GO:0048306]; phospholipase A2 inhibitor activity [GO:0019834]	actin filament [GO:0005884]; apical plasma membrane [GO:0016324]; basolateral plasma membrane [GO:0016323]; cell surface [GO:0009986]; collagen-containing extracellular matrix [GO:0062023]; cornified envelope [GO:0001533]; cytoplasm [GO:0005737]; cytosol [GO:0005829]; early endosome membrane [GO:0031901]; extracellular exosome [GO:0070062]; extracellular space [GO:0005615]; lateral plasma membran…	GO:0001533; GO:0001780; GO:0001891; GO:0002250; GO:0002548; GO:0002685; GO:0005509; GO:0005544; GO:0005615; GO:0005634; GO:0005654; GO:0005737; GO:0005829; GO:0005884; GO:0005886; GO:0006909; GO:0006954; GO:0007165; GO:0007187; GO:0008360; GO:0009986; GO:0014839; GO:0016323; GO:0016324; GO:0016328; GO:0019834; GO:0030036; GO:0030216; GO:0031340; GO:0031514; GO:0031901; GO:0032652; GO:0032717; GO:…		BINDING 59; /ligand=Ca(2+); /ligand_id=ChEBI:CHEBI:29108; /ligand_label=1; /evidence=ECO:0000250|UniProtKB:P19619; BINDING 60; /ligand=Ca(2+); /ligand_id=ChEBI:CHEBI:29108; /ligand_label=1; /evidence=ECO:0000250|UniProtKB:P19619; BINDING 62; /ligand=Ca(2+); /ligand_id=ChEBI:CHEBI:29108; /ligand_label=1; /evidence=ECO:0000250|UniProtKB:P19619; BINDING 97; /ligand=Ca(2+); /ligand_id=ChEBI:CHEBI:291…	cellular organisms (no rank), Eukaryota (superkingdom), Opisthokonta (clade), Metazoa (kingdom), Eumetazoa (clade), Bilateria (clade), Deuterostomia (clade), Chordata (phylum), Craniata (subphylum), Vertebrata (clade), Gnathostomata (clade), Teleostomi (clade), Euteleostomi (clade), Sarcopterygii (superclass), Dipnotetrapodomorpha (clade), Tetrapoda (clade), Amniota (clade), Mammalia (class), The…	131567 (no rank), 2759 (superkingdom), 33154 (clade), 33208 (kingdom), 6072 (clade), 33213 (clade), 33511 (clade), 7711 (phylum), 89593 (subphylum), 7742 (clade), 7776 (clade), 117570 (clade), 117571 (clade), 8287 (superclass), 1338369 (clade), 32523 (clade), 32524 (clade), 40674 (class), 32525 (clade), 9347 (clade), 1437010 (clade), 314146 (superorder), 314147 (clade), 9989 (order), 1963758 (sub…	PTM: Phosphorylated by protein kinase C, EGFR and TRPM7. Phosphorylated in response to EGF treatment. {ECO:0000250|UniProtKB:P04083}.; PTM: Sumoylated. {ECO:0000269|PubMed:23727357}.; PTM: Proteolytically cleaved by cathepsin CTSG to release the active N-terminal peptide Ac2-26. {ECO:0000250|UniProtKB:P04083}.	A0A0F6B5H5	SUBUNIT: Homodimer; non-covalently linked (By similarity). Homodimer; linked by transglutamylation. Homodimers linked by transglutamylation are observed in placenta, but not in other tissues. Interacts with S100A11. Heterotetramer, formed by two molecules each of S100A11 and ANXA1 (By similarity). Interacts with DYSF (PubMed:14506282). Interacts with EGFR (By similarity). {ECO:0000250|UniProtKB:P…
P10126	0.802036	23.5549	3.44919	0.00797582	0.0480335	-2.91963	reviewed	EF1A1_MOUSE	Elongation factor 1-alpha 1 (EF-1-alpha-1) (EC 3.6.5.-) (Elongation factor Tu) (EF-Tu) (Eukaryotic elongation factor 1 A-1) (eEF1A-1)	Eef1a1 Eef1a	462	cellular response to epidermal growth factor stimulus [GO:0071364]; positive regulation by host of viral genome replication [GO:0044829]; translational elongation [GO:0006414]	cortical actin cytoskeleton [GO:0030864]; cytoplasm [GO:0005737]; cytosolic ribosome [GO:0022626]; myelin sheath [GO:0043209]; nucleolus [GO:0005730]; nucleus [GO:0005634]; plasma membrane [GO:0005886]; ruffle membrane [GO:0032587]	calmodulin binding [GO:0005516]; GTP binding [GO:0005525]; GTPase activity [GO:0003924]; kinase activator activity [GO:0019209]; molecular adaptor activity [GO:0060090]; protein kinase binding [GO:0019901]; translation elongation factor activity [GO:0003746]; tRNA binding [GO:0000049]	cortical actin cytoskeleton [GO:0030864]; cytoplasm [GO:0005737]; cytosolic ribosome [GO:0022626]; myelin sheath [GO:0043209]; nucleolus [GO:0005730]; nucleus [GO:0005634]; plasma membrane [GO:0005886]; ruffle membrane [GO:0032587]; calmodulin binding [GO:0005516]; GTP binding [GO:0005525]; GTPase activity [GO:0003924]; kinase activator activity [GO:0019209]; molecular adaptor activity [GO:006009…	GO:0000049; GO:0003746; GO:0003924; GO:0005516; GO:0005525; GO:0005634; GO:0005730; GO:0005737; GO:0005886; GO:0006414; GO:0019209; GO:0019901; GO:0022626; GO:0030864; GO:0032587; GO:0043209; GO:0044829; GO:0060090; GO:0071364		BINDING 14..21; /ligand=GTP; /ligand_id=ChEBI:CHEBI:37565; /evidence=ECO:0000250|UniProtKB:P68105; BINDING 153..156; /ligand=GTP; /ligand_id=ChEBI:CHEBI:37565; /evidence=ECO:0000250|UniProtKB:P68105; BINDING 194..196; /ligand=GTP; /ligand_id=ChEBI:CHEBI:37565; /evidence=ECO:0000250|UniProtKB:P68105	cellular organisms (no rank), Eukaryota (superkingdom), Opisthokonta (clade), Metazoa (kingdom), Eumetazoa (clade), Bilateria (clade), Deuterostomia (clade), Chordata (phylum), Craniata (subphylum), Vertebrata (clade), Gnathostomata (clade), Teleostomi (clade), Euteleostomi (clade), Sarcopterygii (superclass), Dipnotetrapodomorpha (clade), Tetrapoda (clade), Amniota (clade), Mammalia (class), The…	131567 (no rank), 2759 (superkingdom), 33154 (clade), 33208 (kingdom), 6072 (clade), 33213 (clade), 33511 (clade), 7711 (phylum), 89593 (subphylum), 7742 (clade), 7776 (clade), 117570 (clade), 117571 (clade), 8287 (superclass), 1338369 (clade), 32523 (clade), 32524 (clade), 40674 (class), 32525 (clade), 9347 (clade), 1437010 (clade), 314146 (superorder), 314147 (clade), 9989 (order), 1963758 (sub…	PTM: ISGylated. {ECO:0000250|UniProtKB:P68104}.; PTM: Phosphorylated by TXK. Phosphorylation by PASK increases translation efficiency. Phosphorylated by ROCK2. Phosphorylation by TGFBR1 inhibits translation elongation. {ECO:0000250|UniProtKB:P68104}.; PTM: Trimethylated at Lys-79 by EEF1AKMT1. Methylated at Lys-165 by EEF1AKMT3, methylation by EEF1AKMT3 is dynamic as well as inducible by stress c…	Q01534	SUBUNIT: Found in a nuclear export complex with XPO5, EEF1A1, Ran and aminoacylated tRNA. Interacts with PARP1. Interacts with KARS1. May interact with ERGIC2. Interacts with IFIT1 (via TPR repeats 4-7) (By similarity). May interact with ERGIC2 (By similarity). Interacts with IFIT1 (via TPR repeats 4-7) (PubMed:19856081). Interacts with DLC1, facilitating distribution to the membrane periphery an…
P10922	0.558139	24.9214	3.52933	0.00706163	0.044872	-2.79374	reviewed	H10_MOUSE	Histone H1.0 (Histone H1') (Histone H1(0)) (MyD196) [Cleaved into: Histone H1.0, N-terminally processed]	H1-0 H1f0 H1fv	194	heterochromatin formation [GO:0031507]; nucleosome assembly [GO:0006334]	actin cytoskeleton [GO:0015629]; euchromatin [GO:0000791]; Golgi apparatus [GO:0005794]; nuclear body [GO:0016604]; nucleosome [GO:0000786]; nucleus [GO:0005634]; transcription repressor complex [GO:0017053]	chromatin DNA binding [GO:0031490]; DNA binding [GO:0003677]; double-stranded DNA binding [GO:0003690]; minor groove of adenine-thymine-rich DNA binding [GO:0003680]; nucleosome binding [GO:0031491]; structural constituent of chromatin [GO:0030527]	actin cytoskeleton [GO:0015629]; euchromatin [GO:0000791]; Golgi apparatus [GO:0005794]; nuclear body [GO:0016604]; nucleosome [GO:0000786]; nucleus [GO:0005634]; transcription repressor complex [GO:0017053]; chromatin DNA binding [GO:0031490]; DNA binding [GO:0003677]; double-stranded DNA binding [GO:0003690]; minor groove of adenine-thymine-rich DNA binding [GO:0003680]; nucleosome binding [GO:…	GO:0000786; GO:0000791; GO:0003677; GO:0003680; GO:0003690; GO:0005634; GO:0005794; GO:0006334; GO:0015629; GO:0016604; GO:0017053; GO:0030527; GO:0031490; GO:0031491; GO:0031507			cellular organisms (no rank), Eukaryota (superkingdom), Opisthokonta (clade), Metazoa (kingdom), Eumetazoa (clade), Bilateria (clade), Deuterostomia (clade), Chordata (phylum), Craniata (subphylum), Vertebrata (clade), Gnathostomata (clade), Teleostomi (clade), Euteleostomi (clade), Sarcopterygii (superclass), Dipnotetrapodomorpha (clade), Tetrapoda (clade), Amniota (clade), Mammalia (class), The…	131567 (no rank), 2759 (superkingdom), 33154 (clade), 33208 (kingdom), 6072 (clade), 33213 (clade), 33511 (clade), 7711 (phylum), 89593 (subphylum), 7742 (clade), 7776 (clade), 117570 (clade), 117571 (clade), 8287 (superclass), 1338369 (clade), 32523 (clade), 32524 (clade), 40674 (class), 32525 (clade), 9347 (clade), 1437010 (clade), 314146 (superorder), 314147 (clade), 9989 (order), 1963758 (sub…	PTM: ADP-ribosylated on Ser-104 in response to DNA damage. {ECO:0000250|UniProtKB:P07305}.
P12787	-0.778358	25.9297	-4.34583	0.00214649	0.0262525	-1.55236	reviewed	COX5A_MOUSE	Cytochrome c oxidase subunit 5A, mitochondrial (Cytochrome c oxidase polypeptide Va)	Cox5a	146	mitochondrial electron transport, cytochrome c to oxygen [GO:0006123]	mitochondrial inner membrane [GO:0005743]; mitochondrion [GO:0005739]; myelin sheath [GO:0043209]; respiratory chain complex IV [GO:0045277]	metal ion binding [GO:0046872]	mitochondrial inner membrane [GO:0005743]; mitochondrion [GO:0005739]; myelin sheath [GO:0043209]; respiratory chain complex IV [GO:0045277]; metal ion binding [GO:0046872]; mitochondrial electron transport, cytochrome c to oxygen [GO:0006123]	GO:0005739; GO:0005743; GO:0006123; GO:0043209; GO:0045277; GO:0046872			cellular organisms (no rank), Eukaryota (superkingdom), Opisthokonta (clade), Metazoa (kingdom), Eumetazoa (clade), Bilateria (clade), Deuterostomia (clade), Chordata (phylum), Craniata (subphylum), Vertebrata (clade), Gnathostomata (clade), Teleostomi (clade), Euteleostomi (clade), Sarcopterygii (superclass), Dipnotetrapodomorpha (clade), Tetrapoda (clade), Amniota (clade), Mammalia (class), The…	131567 (no rank), 2759 (superkingdom), 33154 (clade), 33208 (kingdom), 6072 (clade), 33213 (clade), 33511 (clade), 7711 (phylum), 89593 (subphylum), 7742 (clade), 7776 (clade), 117570 (clade), 117571 (clade), 8287 (superclass), 1338369 (clade), 32523 (clade), 32524 (clade), 40674 (class), 32525 (clade), 9347 (clade), 1437010 (clade), 314146 (superorder), 314147 (clade), 9989 (order), 1963758 (sub…	PTM: In response to mitochondrial stress, the precursor protein is ubiquitinated by the SIFI complex in the cytoplasm before mitochondrial import, leading to its degradation. Within the SIFI complex, UBR4 initiates ubiquitin chain that are further elongated or branched by KCMF1. {ECO:0000250|UniProtKB:P20674}.		SUBUNIT: Component of the cytochrome c oxidase (complex IV, CIV), a multisubunit enzyme composed of 14 subunits (PubMed:34616041, PubMed:38575788). The complex is composed of a catalytic core of 3 subunits MT-CO1, MT-CO2 and MT-CO3, encoded in the mitochondrial DNA, and 11 supernumerary subunits COX4I, COX5A, COX5B, COX6A, COX6B, COX6C, COX7A, COX7B, COX7C, COX8 and NDUFA4, which are encoded in t…
P14602	2.24585	27.4093	8.43948	2.09307e-05	0.00211139	3.29322	reviewed	HSPB1_MOUSE	Heat shock protein beta-1 (HspB1) (Growth-related 25 kDa protein) (Heat shock 25 kDa protein) (HSP 25) (Heat shock 27 kDa protein) (HSP 27) (p25)	Hspb1 Hsp25 Hsp27	209	anterograde axonal protein transport [GO:0099641]; cellular response to vascular endothelial growth factor stimulus [GO:0035924]; chaperone-mediated protein folding [GO:0061077]; intracellular signal transduction [GO:0035556]; negative regulation of apoptotic signaling pathway [GO:2001234]; negative regulation of oxidative stress-induced intrinsic apoptotic signaling pathway [GO:1902176]; negativ…	axon cytoplasm [GO:1904115]; contractile muscle fiber [GO:0043292]; cornified envelope [GO:0001533]; cytoplasm [GO:0005737]; nucleus [GO:0005634]; plasma membrane [GO:0005886]; proteasome complex [GO:0000502]; spindle [GO:0005819]; Z disc [GO:0030018]	identical protein binding [GO:0042802]; protein folding chaperone [GO:0044183]; protein homodimerization activity [GO:0042803]; protein kinase C binding [GO:0005080]; protein kinase C inhibitor activity [GO:0008426]; RNA polymerase II-specific DNA-binding transcription factor binding [GO:0061629]; ubiquitin binding [GO:0043130]	axon cytoplasm [GO:1904115]; contractile muscle fiber [GO:0043292]; cornified envelope [GO:0001533]; cytoplasm [GO:0005737]; nucleus [GO:0005634]; plasma membrane [GO:0005886]; proteasome complex [GO:0000502]; spindle [GO:0005819]; Z disc [GO:0030018]; identical protein binding [GO:0042802]; protein folding chaperone [GO:0044183]; protein homodimerization activity [GO:0042803]; protein kinase C b…	GO:0000502; GO:0001533; GO:0005080; GO:0005634; GO:0005737; GO:0005819; GO:0005886; GO:0006469; GO:0006986; GO:0008426; GO:0009615; GO:0030018; GO:0032731; GO:0032760; GO:0035556; GO:0035924; GO:0042802; GO:0042803; GO:0043122; GO:0043130; GO:0043292; GO:0043536; GO:0044183; GO:0045766; GO:0048010; GO:0061077; GO:0061629; GO:0099641; GO:1902176; GO:1904115; GO:2001028; GO:2001234			cellular organisms (no rank), Eukaryota (superkingdom), Opisthokonta (clade), Metazoa (kingdom), Eumetazoa (clade), Bilateria (clade), Deuterostomia (clade), Chordata (phylum), Craniata (subphylum), Vertebrata (clade), Gnathostomata (clade), Teleostomi (clade), Euteleostomi (clade), Sarcopterygii (superclass), Dipnotetrapodomorpha (clade), Tetrapoda (clade), Amniota (clade), Mammalia (class), The…	131567 (no rank), 2759 (superkingdom), 33154 (clade), 33208 (kingdom), 6072 (clade), 33213 (clade), 33511 (clade), 7711 (phylum), 89593 (subphylum), 7742 (clade), 7776 (clade), 117570 (clade), 117571 (clade), 8287 (superclass), 1338369 (clade), 32523 (clade), 32524 (clade), 40674 (class), 32525 (clade), 9347 (clade), 1437010 (clade), 314146 (superorder), 314147 (clade), 9989 (order), 1963758 (sub…	PTM: Phosphorylated upon exposure to protein kinase C activators and heat shock (By similarity). Phosphorylation by MAPKAPK2 and MAPKAPK3 in response to stress dissociates HSPB1 from large small heat-shock protein (sHsps) oligomers and impairs its chaperone activity and ability to protect against oxidative stress effectively. Phosphorylation by MAPKAPK5 in response to PKA stimulation induces F-ac…		SUBUNIT: Homooligomer. Homodimer; becomes monomeric upon activation. Heterooligomer; with HSPB6. Associates with alpha- and beta-tubulin (By similarity). Interacts with TGFB1I1 (PubMed:11546764). Interacts with CRYAB (By similarity). Interacts with HSPB8 (PubMed:11342557). Interacts with HSPBAP1 (PubMed:10751411). {ECO:0000250|UniProtKB:P04792, ECO:0000269|PubMed:10751411, ECO:0000269|PubMed:1134…
P14733	0.743162	23.9202	3.55733	0.00676885	0.0440583	-2.7499	reviewed	LMNB1_MOUSE	Lamin-B1	Lmnb1	588	nuclear envelope organization [GO:0006998]; positive regulation of G2/M transition of mitotic cell cycle [GO:0010971]; positive regulation of JNK cascade [GO:0046330]	lamin filament [GO:0005638]; nuclear envelope [GO:0005635]; nuclear inner membrane [GO:0005637]; nuclear lamina [GO:0005652]; nuclear matrix [GO:0016363]; nuclear periphery [GO:0034399]; nucleoplasm [GO:0005654]; nucleus [GO:0005634]	double-stranded DNA binding [GO:0003690]; JUN kinase binding [GO:0008432]; phospholipase binding [GO:0043274]; sequence-specific double-stranded DNA binding [GO:1990837]; structural constituent of nuclear lamina [GO:0160123]	lamin filament [GO:0005638]; nuclear envelope [GO:0005635]; nuclear inner membrane [GO:0005637]; nuclear lamina [GO:0005652]; nuclear matrix [GO:0016363]; nuclear periphery [GO:0034399]; nucleoplasm [GO:0005654]; nucleus [GO:0005634]; double-stranded DNA binding [GO:0003690]; JUN kinase binding [GO:0008432]; phospholipase binding [GO:0043274]; sequence-specific double-stranded DNA binding [GO:199…	GO:0003690; GO:0005634; GO:0005635; GO:0005637; GO:0005638; GO:0005652; GO:0005654; GO:0006998; GO:0008432; GO:0010971; GO:0016363; GO:0034399; GO:0043274; GO:0046330; GO:0160123; GO:1990837			cellular organisms (no rank), Eukaryota (superkingdom), Opisthokonta (clade), Metazoa (kingdom), Eumetazoa (clade), Bilateria (clade), Deuterostomia (clade), Chordata (phylum), Craniata (subphylum), Vertebrata (clade), Gnathostomata (clade), Teleostomi (clade), Euteleostomi (clade), Sarcopterygii (superclass), Dipnotetrapodomorpha (clade), Tetrapoda (clade), Amniota (clade), Mammalia (class), The…	131567 (no rank), 2759 (superkingdom), 33154 (clade), 33208 (kingdom), 6072 (clade), 33213 (clade), 33511 (clade), 7711 (phylum), 89593 (subphylum), 7742 (clade), 7776 (clade), 117570 (clade), 117571 (clade), 8287 (superclass), 1338369 (clade), 32523 (clade), 32524 (clade), 40674 (class), 32525 (clade), 9347 (clade), 1437010 (clade), 314146 (superorder), 314147 (clade), 9989 (order), 1963758 (sub…	PTM: B-type lamins undergo a series of modifications, such as farnesylation and phosphorylation. Increased phosphorylation of the lamins occurs before envelope disintegration and probably plays a role in regulating lamin associations. {ECO:0000250|UniProtKB:P20700}.; PTM: Phosphorylation plays a key role in lamin organization, subcellular localization and nuclear envelope disintegration (By simil…		SUBUNIT: Homodimer (PubMed:28241138). Lamin dimers then assemble into dimeric head-to-tail polymers (PubMed:28241138). Ultimately, two head-to-tail polymers assemble laterally into a protofilament with a uniformly shaped rod of 3.5 nm in diameter (PubMed:28241138). Interacts with SPAG4 and SEPT12 (By similarity). {ECO:0000250|UniProtKB:P20700, ECO:0000269|PubMed:28241138}.
P15105	2.25454	21.9043	5.59344	0.000418825	0.0105656	0.165421	reviewed	GLNA_MOUSE	Glutamine synthetase (GS) (EC 6.3.1.2) (Glutamate--ammonia ligase) (Palmitoyltransferase GLUL) (EC 2.3.1.225)	Glul Glns	373	angiogenesis [GO:0001525]; cell population proliferation [GO:0008283]; cellular response to starvation [GO:0009267]; glutamine biosynthetic process [GO:0006542]; intracellular ammonium homeostasis [GO:0097275]; positive regulation of erythrocyte differentiation [GO:0045648]; protein palmitoylation [GO:0018345]; regulation of endothelial cell migration [GO:0010594]; regulation of protein localizat…	cell body [GO:0044297]; cytoplasm [GO:0005737]; cytosol [GO:0005829]; endoplasmic reticulum [GO:0005783]; glial cell projection [GO:0097386]; mitochondrion [GO:0005739]; myelin sheath [GO:0043209]; plasma membrane [GO:0005886]	ATP binding [GO:0005524]; glutamine synthetase activity [GO:0004356]; identical protein binding [GO:0042802]; metal ion binding [GO:0046872]; protein-cysteine S-palmitoyltransferase activity [GO:0019706]	cell body [GO:0044297]; cytoplasm [GO:0005737]; cytosol [GO:0005829]; endoplasmic reticulum [GO:0005783]; glial cell projection [GO:0097386]; mitochondrion [GO:0005739]; myelin sheath [GO:0043209]; plasma membrane [GO:0005886]; ATP binding [GO:0005524]; glutamine synthetase activity [GO:0004356]; identical protein binding [GO:0042802]; metal ion binding [GO:0046872]; protein-cysteine S-palmitoylt…	GO:0001525; GO:0004356; GO:0005524; GO:0005737; GO:0005739; GO:0005783; GO:0005829; GO:0005886; GO:0006542; GO:0008283; GO:0009267; GO:0009749; GO:0010594; GO:0018345; GO:0019706; GO:0042254; GO:0042802; GO:0043209; GO:0044297; GO:0045648; GO:0046872; GO:0097275; GO:0097386; GO:1903670; GO:1904749		BINDING 134; /ligand=ATP; /ligand_id=ChEBI:CHEBI:30616; /evidence=ECO:0000250|UniProtKB:P15104; BINDING 134; /ligand=Mn(2+); /ligand_id=ChEBI:CHEBI:29035; /ligand_label=1; /evidence=ECO:0000250|UniProtKB:P15104; BINDING 136; /ligand=Mn(2+); /ligand_id=ChEBI:CHEBI:29035; /ligand_label=2; /evidence=ECO:0000250|UniProtKB:P15104; BINDING 196; /ligand=Mn(2+); /ligand_id=ChEBI:CHEBI:29035; /ligand_labe…	cellular organisms (no rank), Eukaryota (superkingdom), Opisthokonta (clade), Metazoa (kingdom), Eumetazoa (clade), Bilateria (clade), Deuterostomia (clade), Chordata (phylum), Craniata (subphylum), Vertebrata (clade), Gnathostomata (clade), Teleostomi (clade), Euteleostomi (clade), Sarcopterygii (superclass), Dipnotetrapodomorpha (clade), Tetrapoda (clade), Amniota (clade), Mammalia (class), The…	131567 (no rank), 2759 (superkingdom), 33154 (clade), 33208 (kingdom), 6072 (clade), 33213 (clade), 33511 (clade), 7711 (phylum), 89593 (subphylum), 7742 (clade), 7776 (clade), 117570 (clade), 117571 (clade), 8287 (superclass), 1338369 (clade), 32523 (clade), 32524 (clade), 40674 (class), 32525 (clade), 9347 (clade), 1437010 (clade), 314146 (superorder), 314147 (clade), 9989 (order), 1963758 (sub…	PTM: Acetylated by EP300/p300; acetylation is stimulated by increased glutamine levels and promotes ubiquitin-mediated proteasomal degradation. {ECO:0000250|UniProtKB:P15104}.; PTM: Palmitoylated; undergoes autopalmitoylation. {ECO:0000250|UniProtKB:P15104}.; PTM: Ubiquitinated by ZNRF1 (PubMed:20107048). Ubiquitinated by the DCX (DDB1-CUL4-X-box) E3 ubiquitin-protein ligase complex called CRL4(C…		SUBUNIT: Decamer; composed of two pentamers (By similarity). Interacts with PALMD (PubMed:16323283). Interacts with RHOJ (By similarity). Interacts with BEST2; this interaction tethers a fraction of GLUL to the membrane, causing a decrease of cytosolic glutamine synthase (GS) activity and inhibits the chloride channel activity of BEST2 by affecting the gating at the aperture in the absence of int…
P15864	1.15714	24.1697	8.85485	1.44645e-05	0.00167634	3.67275	reviewed	H12_MOUSE	Histone H1.2 (H1 VAR.1) (H1c)	H1-2 H1f2 Hist1h1c	212	chromatin organization [GO:0006325]; negative regulation of transcription by RNA polymerase II [GO:0000122]; nucleosome assembly [GO:0006334]; regulation of transcription by RNA polymerase II [GO:0006357]	euchromatin [GO:0000791]; nucleosome [GO:0000786]; nucleus [GO:0005634]	chromatin DNA binding [GO:0031490]; DNA binding [GO:0003677]; structural constituent of chromatin [GO:0030527]	euchromatin [GO:0000791]; nucleosome [GO:0000786]; nucleus [GO:0005634]; chromatin DNA binding [GO:0031490]; DNA binding [GO:0003677]; structural constituent of chromatin [GO:0030527]; chromatin organization [GO:0006325]; negative regulation of transcription by RNA polymerase II [GO:0000122]; nucleosome assembly [GO:0006334]; regulation of transcription by RNA polymerase II [GO:0006357]	GO:0000122; GO:0000786; GO:0000791; GO:0003677; GO:0005634; GO:0006325; GO:0006334; GO:0006357; GO:0030527; GO:0031490			cellular organisms (no rank), Eukaryota (superkingdom), Opisthokonta (clade), Metazoa (kingdom), Eumetazoa (clade), Bilateria (clade), Deuterostomia (clade), Chordata (phylum), Craniata (subphylum), Vertebrata (clade), Gnathostomata (clade), Teleostomi (clade), Euteleostomi (clade), Sarcopterygii (superclass), Dipnotetrapodomorpha (clade), Tetrapoda (clade), Amniota (clade), Mammalia (class), The…	131567 (no rank), 2759 (superkingdom), 33154 (clade), 33208 (kingdom), 6072 (clade), 33213 (clade), 33511 (clade), 7711 (phylum), 89593 (subphylum), 7742 (clade), 7776 (clade), 117570 (clade), 117571 (clade), 8287 (superclass), 1338369 (clade), 32523 (clade), 32524 (clade), 40674 (class), 32525 (clade), 9347 (clade), 1437010 (clade), 314146 (superorder), 314147 (clade), 9989 (order), 1963758 (sub…	PTM: H1 histones are progressively phosphorylated during the cell cycle, becoming maximally phosphorylated during late G2 phase and M phase, and being dephosphorylated sharply thereafter. {ECO:0000250}.; PTM: Crotonylation (Kcr) is specifically present in male germ cells and marks testis-specific genes in post-meiotic cells, including X-linked genes that escape sex chromosome inactivation in hapl…	Q99MD9	SUBUNIT: Interacts with TSC22D1 isoform 2. {ECO:0000250|UniProtKB:P16403}.
P16125	-1.00326	25.0623	-4.04316	0.00330127	0.0339118	-2.00281	reviewed	LDHB_MOUSE	L-lactate dehydrogenase B chain (LDH-B) (EC 1.1.1.27) (LDH heart subunit) (LDH-H)	Ldhb Ldh-2 Ldh2	334	lactate biosynthetic process from pyruvate [GO:0019244]	cytosol [GO:0005829]; mitochondrial inner membrane [GO:0005743]; mitochondrion [GO:0005739]; myelin sheath [GO:0043209]	L-lactate dehydrogenase activity [GO:0004459]	cytosol [GO:0005829]; mitochondrial inner membrane [GO:0005743]; mitochondrion [GO:0005739]; myelin sheath [GO:0043209]; L-lactate dehydrogenase activity [GO:0004459]; lactate biosynthetic process from pyruvate [GO:0019244]	GO:0004459; GO:0005739; GO:0005743; GO:0005829; GO:0019244; GO:0043209	ACT_SITE 194; /note=Proton acceptor; /evidence=ECO:0000250	BINDING 30..58; /ligand=NAD(+); /ligand_id=ChEBI:CHEBI:57540; /evidence=ECO:0000250; BINDING 100; /ligand=NAD(+); /ligand_id=ChEBI:CHEBI:57540; /evidence=ECO:0000250; BINDING 107; /ligand=substrate; /evidence=ECO:0000250; BINDING 139; /ligand=NAD(+); /ligand_id=ChEBI:CHEBI:57540; /evidence=ECO:0000250; BINDING 139; /ligand=substrate; /evidence=ECO:0000250; BINDING 170; /ligand=substrate; /evidenc…	cellular organisms (no rank), Eukaryota (superkingdom), Opisthokonta (clade), Metazoa (kingdom), Eumetazoa (clade), Bilateria (clade), Deuterostomia (clade), Chordata (phylum), Craniata (subphylum), Vertebrata (clade), Gnathostomata (clade), Teleostomi (clade), Euteleostomi (clade), Sarcopterygii (superclass), Dipnotetrapodomorpha (clade), Tetrapoda (clade), Amniota (clade), Mammalia (class), The…	131567 (no rank), 2759 (superkingdom), 33154 (clade), 33208 (kingdom), 6072 (clade), 33213 (clade), 33511 (clade), 7711 (phylum), 89593 (subphylum), 7742 (clade), 7776 (clade), 117570 (clade), 117571 (clade), 8287 (superclass), 1338369 (clade), 32523 (clade), 32524 (clade), 40674 (class), 32525 (clade), 9347 (clade), 1437010 (clade), 314146 (superorder), 314147 (clade), 9989 (order), 1963758 (sub…			SUBUNIT: Homotetramer. Interacts with PTEN upstream reading frame protein MP31; the interaction leads to inhibition of mitochondrial lactate dehydrogenase activity, preventing conversion of lactate to pyruvate in mitochondria. {ECO:0000250|UniProtKB:P07195}.
P17742	0.861743	27.1327	5.02953	0.000852709	0.0160032	-0.582669	reviewed	PPIA_MOUSE	Peptidyl-prolyl cis-trans isomerase A (PPIase A) (EC 5.2.1.8) (Cyclophilin A) (Cyclosporin A-binding protein) (Rotamase A) (SP18) [Cleaved into: Peptidyl-prolyl cis-trans isomerase A, N-terminally processed]	Ppia	164	activation of protein kinase B activity [GO:0032148]; apoptotic process [GO:0006915]; cell adhesion molecule production [GO:0060352]; cellular response to oxidative stress [GO:0034599]; endothelial cell activation [GO:0042118]; leukocyte chemotaxis [GO:0030595]; lipid droplet organization [GO:0034389]; negative regulation of oxidative stress-induced intrinsic apoptotic signaling pathway [GO:19021…	cytoplasm [GO:0005737]; cytosol [GO:0005829]; extracellular region [GO:0005576]; extracellular space [GO:0005615]; myelin sheath [GO:0043209]; nucleus [GO:0005634]; protein-containing complex [GO:0032991]	heparan sulfate binding [GO:1904399]; integrin binding [GO:0005178]; peptidyl-prolyl cis-trans isomerase activity [GO:0003755]; RNA polymerase II CTD heptapeptide repeat P3 isomerase activity [GO:0140839]; RNA polymerase II CTD heptapeptide repeat P6 isomerase activity [GO:0140840]	cytoplasm [GO:0005737]; cytosol [GO:0005829]; extracellular region [GO:0005576]; extracellular space [GO:0005615]; myelin sheath [GO:0043209]; nucleus [GO:0005634]; protein-containing complex [GO:0032991]; heparan sulfate binding [GO:1904399]; integrin binding [GO:0005178]; peptidyl-prolyl cis-trans isomerase activity [GO:0003755]; RNA polymerase II CTD heptapeptide repeat P3 isomerase activity […	GO:0000413; GO:0001933; GO:0001934; GO:0003755; GO:0005178; GO:0005576; GO:0005615; GO:0005634; GO:0005737; GO:0005829; GO:0006457; GO:0006469; GO:0006915; GO:0030168; GO:0030182; GO:0030593; GO:0030595; GO:0032148; GO:0032873; GO:0032991; GO:0034389; GO:0034599; GO:0042118; GO:0043209; GO:0043410; GO:0045069; GO:0045070; GO:0050714; GO:0051092; GO:0060352; GO:0061944; GO:0070527; GO:0140839; GO:…			cellular organisms (no rank), Eukaryota (superkingdom), Opisthokonta (clade), Metazoa (kingdom), Eumetazoa (clade), Bilateria (clade), Deuterostomia (clade), Chordata (phylum), Craniata (subphylum), Vertebrata (clade), Gnathostomata (clade), Teleostomi (clade), Euteleostomi (clade), Sarcopterygii (superclass), Dipnotetrapodomorpha (clade), Tetrapoda (clade), Amniota (clade), Mammalia (class), The…	131567 (no rank), 2759 (superkingdom), 33154 (clade), 33208 (kingdom), 6072 (clade), 33213 (clade), 33511 (clade), 7711 (phylum), 89593 (subphylum), 7742 (clade), 7776 (clade), 117570 (clade), 117571 (clade), 8287 (superclass), 1338369 (clade), 32523 (clade), 32524 (clade), 40674 (class), 32525 (clade), 9347 (clade), 1437010 (clade), 314146 (superorder), 314147 (clade), 9989 (order), 1963758 (sub…	PTM: Acetylation at Lys-125 markedly inhibits catalysis of cis to trans isomerization (By similarity). PPIA acetylation also antagonizes the immunosuppressive effects of cyclosporine by inhibiting the sequential steps of cyclosporine binding and calcineurin inhibition (By similarity). Acetylation at Lys-125 favors the interaction with TARDBP (By similarity). {ECO:0000250|UniProtKB:P62937}.		SUBUNIT: Interacts with protein phosphatase PPP3CA/calcineurin A (By similarity). Interacts with PRPF19 isoform 2 (via N-terminus) (PubMed:16352598). Interacts with isoform 2 of BSG/CD147 (By similarity). Interacts with FOXO1; the interaction promotes FOXO1 dephosphorylation, nuclear accumulation and transcriptional activity (By similarity). Interacts with integrin ITGA2B:ITGB3; the interaction i…
P18242	0.729085	24.0934	3.67857	0.00564156	0.0429382	-2.56098	reviewed	CATD_MOUSE	Cathepsin D (EC 3.4.23.5)	Ctsd	410	autophagosome assembly [GO:0000045]; execution phase of apoptosis [GO:0097194]; insulin catabolic process [GO:1901143]; insulin receptor recycling [GO:0038020]; lipoprotein catabolic process [GO:0042159]; positive regulation of apoptotic process [GO:0043065]; proteolysis [GO:0006508]; regulation of establishment of protein localization [GO:0070201]	collagen-containing extracellular matrix [GO:0062023]; cytosol [GO:0005829]; endosome lumen [GO:0031904]; endosome membrane [GO:0010008]; extracellular space [GO:0005615]; lysosomal membrane [GO:0005765]; lysosome [GO:0005764]; melanosome [GO:0042470]; membrane raft [GO:0045121]; mitochondrion [GO:0005739]	aspartic-type endopeptidase activity [GO:0004190]; aspartic-type peptidase activity [GO:0070001]; endopeptidase activity [GO:0004175]; hydrolase activity [GO:0016787]; peptidase activity [GO:0008233]	collagen-containing extracellular matrix [GO:0062023]; cytosol [GO:0005829]; endosome lumen [GO:0031904]; endosome membrane [GO:0010008]; extracellular space [GO:0005615]; lysosomal membrane [GO:0005765]; lysosome [GO:0005764]; melanosome [GO:0042470]; membrane raft [GO:0045121]; mitochondrion [GO:0005739]; aspartic-type endopeptidase activity [GO:0004190]; aspartic-type peptidase activity [GO:00…	GO:0000045; GO:0004175; GO:0004190; GO:0005615; GO:0005739; GO:0005764; GO:0005765; GO:0005829; GO:0006508; GO:0008233; GO:0010008; GO:0016787; GO:0031904; GO:0038020; GO:0042159; GO:0042470; GO:0043065; GO:0045121; GO:0062023; GO:0070001; GO:0070201; GO:0097194; GO:1901143	ACT_SITE 97; /evidence=ECO:0000255|PROSITE-ProRule:PRU10094; ACT_SITE 293; /evidence=ECO:0000255|PROSITE-ProRule:PRU10094		cellular organisms (no rank), Eukaryota (superkingdom), Opisthokonta (clade), Metazoa (kingdom), Eumetazoa (clade), Bilateria (clade), Deuterostomia (clade), Chordata (phylum), Craniata (subphylum), Vertebrata (clade), Gnathostomata (clade), Teleostomi (clade), Euteleostomi (clade), Sarcopterygii (superclass), Dipnotetrapodomorpha (clade), Tetrapoda (clade), Amniota (clade), Mammalia (class), The…	131567 (no rank), 2759 (superkingdom), 33154 (clade), 33208 (kingdom), 6072 (clade), 33213 (clade), 33511 (clade), 7711 (phylum), 89593 (subphylum), 7742 (clade), 7776 (clade), 117570 (clade), 117571 (clade), 8287 (superclass), 1338369 (clade), 32523 (clade), 32524 (clade), 40674 (class), 32525 (clade), 9347 (clade), 1437010 (clade), 314146 (superorder), 314147 (clade), 9989 (order), 1963758 (sub…	PTM: N- and O-glycosylated. {ECO:0000250|UniProtKB:P07339, ECO:0000269|PubMed:16170054}.; PTM: Undergoes proteolytic cleavage and activation by ADAM30. {ECO:0000250|UniProtKB:P07339}.		SUBUNIT: Consists of a light chain and a heavy chain. Interacts with ADAM30; this leads to activation of CTSD. Interacts with GRN; stabilizes CTSD; increases its proteolytic activity (PubMed:28453791). {ECO:0000250|UniProtKB:P07339, ECO:0000269|PubMed:28453791}.
P18826	-0.935848	22.9711	-4.16691	0.00276406	0.0316008	-1.81715	reviewed	KPB1_MOUSE	Phosphorylase b kinase regulatory subunit alpha, skeletal muscle isoform (Phosphorylase kinase alpha M subunit)	Phka1	1241	glycogen metabolic process [GO:0005977]; positive regulation of glycogen catabolic process [GO:0045819]	plasma membrane [GO:0005886]	calmodulin binding [GO:0005516]	plasma membrane [GO:0005886]; calmodulin binding [GO:0005516]; glycogen metabolic process [GO:0005977]; positive regulation of glycogen catabolic process [GO:0045819]	GO:0005516; GO:0005886; GO:0005977; GO:0045819			cellular organisms (no rank), Eukaryota (superkingdom), Opisthokonta (clade), Metazoa (kingdom), Eumetazoa (clade), Bilateria (clade), Deuterostomia (clade), Chordata (phylum), Craniata (subphylum), Vertebrata (clade), Gnathostomata (clade), Teleostomi (clade), Euteleostomi (clade), Sarcopterygii (superclass), Dipnotetrapodomorpha (clade), Tetrapoda (clade), Amniota (clade), Mammalia (class), The…	131567 (no rank), 2759 (superkingdom), 33154 (clade), 33208 (kingdom), 6072 (clade), 33213 (clade), 33511 (clade), 7711 (phylum), 89593 (subphylum), 7742 (clade), 7776 (clade), 117570 (clade), 117571 (clade), 8287 (superclass), 1338369 (clade), 32523 (clade), 32524 (clade), 40674 (class), 32525 (clade), 9347 (clade), 1437010 (clade), 314146 (superorder), 314147 (clade), 9989 (order), 1963758 (sub…	PTM: Although the final Cys may be farnesylated, the terminal tripeptide is probably not removed, and the C-terminus is not methylated. {ECO:0000250|UniProtKB:P18688}.		SUBUNIT: Hexadecamer of 4 heterotetramers, each composed of alpha, beta, gamma, and delta subunits. Alpha (PHKA1 or PHKA2) and beta (PHKB) are regulatory subunits, gamma (PHKG1 or PHKG2) is the catalytic subunit, and delta is calmodulin.
P19536	-1.15383	24.2532	-6.20053	0.000204404	0.00659817	0.919534	reviewed	COX5B_MOUSE	Cytochrome c oxidase subunit 5B, mitochondrial (Cytochrome c oxidase polypeptide Vb)	Cox5b	128	mitochondrial electron transport, cytochrome c to oxygen [GO:0006123]	mitochondrial inner membrane [GO:0005743]; mitochondrion [GO:0005739]; myelin sheath [GO:0043209]; respiratory chain complex IV [GO:0045277]	metal ion binding [GO:0046872]	mitochondrial inner membrane [GO:0005743]; mitochondrion [GO:0005739]; myelin sheath [GO:0043209]; respiratory chain complex IV [GO:0045277]; metal ion binding [GO:0046872]; mitochondrial electron transport, cytochrome c to oxygen [GO:0006123]	GO:0005739; GO:0005743; GO:0006123; GO:0043209; GO:0045277; GO:0046872		BINDING 90; /ligand=Zn(2+); /ligand_id=ChEBI:CHEBI:29105; /evidence=ECO:0000255|PROSITE-ProRule:PRU00692, ECO:0000269|PubMed:34616041, ECO:0007744|PDB:7O37, ECO:0007744|PDB:7O3C; BINDING 92; /ligand=Zn(2+); /ligand_id=ChEBI:CHEBI:29105; /evidence=ECO:0000255|PROSITE-ProRule:PRU00692, ECO:0000269|PubMed:34616041, ECO:0007744|PDB:7O37, ECO:0007744|PDB:7O3C; BINDING 112; /ligand=Zn(2+); /ligand_id=C…	cellular organisms (no rank), Eukaryota (superkingdom), Opisthokonta (clade), Metazoa (kingdom), Eumetazoa (clade), Bilateria (clade), Deuterostomia (clade), Chordata (phylum), Craniata (subphylum), Vertebrata (clade), Gnathostomata (clade), Teleostomi (clade), Euteleostomi (clade), Sarcopterygii (superclass), Dipnotetrapodomorpha (clade), Tetrapoda (clade), Amniota (clade), Mammalia (class), The…	131567 (no rank), 2759 (superkingdom), 33154 (clade), 33208 (kingdom), 6072 (clade), 33213 (clade), 33511 (clade), 7711 (phylum), 89593 (subphylum), 7742 (clade), 7776 (clade), 117570 (clade), 117571 (clade), 8287 (superclass), 1338369 (clade), 32523 (clade), 32524 (clade), 40674 (class), 32525 (clade), 9347 (clade), 1437010 (clade), 314146 (superorder), 314147 (clade), 9989 (order), 1963758 (sub…			SUBUNIT: Component of the cytochrome c oxidase (complex IV, CIV), a multisubunit enzyme composed of 14 subunits (PubMed:34616041, PubMed:38575788). The complex is composed of a catalytic core of 3 subunits MT-CO1, MT-CO2 and MT-CO3, encoded in the mitochondrial DNA, and 11 supernumerary subunits COX4I, COX5A, COX5B, COX6A, COX6B, COX6C, COX7A, COX7B, COX7C, COX8 and NDUFA4, which are encoded in t…
P19783	-0.62112	28.1804	-3.65064	0.00588237	0.0437403	-2.60437	reviewed	COX41_MOUSE	Cytochrome c oxidase subunit 4 isoform 1, mitochondrial (Cytochrome c oxidase polypeptide IV) (Cytochrome c oxidase subunit IV isoform 1) (COX IV-1)	Cox4i1 Cox4 Cox4a Coxiv	169	mitochondrial electron transport, cytochrome c to oxygen [GO:0006123]	cytosol [GO:0005829]; mitochondrial inner membrane [GO:0005743]; mitochondrial membrane [GO:0031966]; mitochondrion [GO:0005739]; nucleoplasm [GO:0005654]; respiratory chain complex IV [GO:0045277]		cytosol [GO:0005829]; mitochondrial inner membrane [GO:0005743]; mitochondrial membrane [GO:0031966]; mitochondrion [GO:0005739]; nucleoplasm [GO:0005654]; respiratory chain complex IV [GO:0045277]; mitochondrial electron transport, cytochrome c to oxygen [GO:0006123]	GO:0005654; GO:0005739; GO:0005743; GO:0005829; GO:0006123; GO:0031966; GO:0045277			cellular organisms (no rank), Eukaryota (superkingdom), Opisthokonta (clade), Metazoa (kingdom), Eumetazoa (clade), Bilateria (clade), Deuterostomia (clade), Chordata (phylum), Craniata (subphylum), Vertebrata (clade), Gnathostomata (clade), Teleostomi (clade), Euteleostomi (clade), Sarcopterygii (superclass), Dipnotetrapodomorpha (clade), Tetrapoda (clade), Amniota (clade), Mammalia (class), The…	131567 (no rank), 2759 (superkingdom), 33154 (clade), 33208 (kingdom), 6072 (clade), 33213 (clade), 33511 (clade), 7711 (phylum), 89593 (subphylum), 7742 (clade), 7776 (clade), 117570 (clade), 117571 (clade), 8287 (superclass), 1338369 (clade), 32523 (clade), 32524 (clade), 40674 (class), 32525 (clade), 9347 (clade), 1437010 (clade), 314146 (superorder), 314147 (clade), 9989 (order), 1963758 (sub…			SUBUNIT: Component of the cytochrome c oxidase (complex IV, CIV), a multisubunit enzyme composed of 14 subunits (PubMed:34616041, PubMed:38575788). The complex is composed of a catalytic core of 3 subunits MT-CO1, MT-CO2 and MT-CO3, encoded in the mitochondrial DNA, and 11 supernumerary subunits COX4I, COX5A, COX5B, COX6A, COX6B, COX6C, COX7A, COX7B, COX7C, COX8 and NDUFA4, which are encoded in t…
P20108	-0.795955	24.2156	-4.14326	0.00285899	0.0316055	-1.85247	reviewed	PRDX3_MOUSE	Thioredoxin-dependent peroxide reductase, mitochondrial (EC 1.11.1.24) (Antioxidant protein 1) (AOP-1) (PRX III) (Perioredoxin-3) (Protein MER5) (Thioredoxin-dependent peroxiredoxin 3)	Prdx3 Aop1 Mer5	257	cellular response to reactive oxygen species [GO:0034614]; hydrogen peroxide catabolic process [GO:0042744]; maternal placenta development [GO:0001893]; mitochondrion organization [GO:0007005]; myeloid cell differentiation [GO:0030099]; negative regulation of apoptotic process [GO:0043066]; positive regulation of cell population proliferation [GO:0008284]; regulation of mitochondrial membrane pot…	cytosol [GO:0005829]; early endosome [GO:0005769]; mitochondrion [GO:0005739]; myelin sheath [GO:0043209]; nucleoplasm [GO:0005654]; plasma membrane [GO:0005886]; protein-containing complex [GO:0032991]	cysteine-type endopeptidase inhibitor activity involved in apoptotic process [GO:0043027]; identical protein binding [GO:0042802]; protein kinase binding [GO:0019901]; thioredoxin peroxidase activity [GO:0008379]	cytosol [GO:0005829]; early endosome [GO:0005769]; mitochondrion [GO:0005739]; myelin sheath [GO:0043209]; nucleoplasm [GO:0005654]; plasma membrane [GO:0005886]; protein-containing complex [GO:0032991]; cysteine-type endopeptidase inhibitor activity involved in apoptotic process [GO:0043027]; identical protein binding [GO:0042802]; protein kinase binding [GO:0019901]; thioredoxin peroxidase acti…	GO:0001893; GO:0005654; GO:0005739; GO:0005769; GO:0005829; GO:0005886; GO:0006979; GO:0007005; GO:0008284; GO:0008379; GO:0019901; GO:0030099; GO:0032496; GO:0032991; GO:0034614; GO:0042542; GO:0042744; GO:0042802; GO:0043027; GO:0043066; GO:0043209; GO:0051881	ACT_SITE 109; /note=Cysteine sulfenic acid (-SOH) intermediate; /evidence=ECO:0000250|UniProtKB:P35705		cellular organisms (no rank), Eukaryota (superkingdom), Opisthokonta (clade), Metazoa (kingdom), Eumetazoa (clade), Bilateria (clade), Deuterostomia (clade), Chordata (phylum), Craniata (subphylum), Vertebrata (clade), Gnathostomata (clade), Teleostomi (clade), Euteleostomi (clade), Sarcopterygii (superclass), Dipnotetrapodomorpha (clade), Tetrapoda (clade), Amniota (clade), Mammalia (class), The…	131567 (no rank), 2759 (superkingdom), 33154 (clade), 33208 (kingdom), 6072 (clade), 33213 (clade), 33511 (clade), 7711 (phylum), 89593 (subphylum), 7742 (clade), 7776 (clade), 117570 (clade), 117571 (clade), 8287 (superclass), 1338369 (clade), 32523 (clade), 32524 (clade), 40674 (class), 32525 (clade), 9347 (clade), 1437010 (clade), 314146 (superorder), 314147 (clade), 9989 (order), 1963758 (sub…	PTM: Phosphorylated by LRRK2; phosphorylation reduces perodixase activity. {ECO:0000250|UniProtKB:P30048}.; PTM: The enzyme can be inactivated by further oxidation of the cysteine sulfenic acid (C(P)-SOH) to sulphinic acid (C(P)-SO2H) and sulphonic acid (C(P)-SO3H) instead of its condensation to a disulfide bond. {ECO:0000250|UniProtKB:P30048}.; PTM: S-palmitoylated. {ECO:0000269|PubMed:31740833}.		SUBUNIT: Homodimer; disulfide-linked, upon oxidation. 6 homodimers assemble to form a ring-like dodecamer. Interacts with NEK6. Interacts with LRRK2. Interacts with MAP3K13 (By similarity). Interacts with RPS6KC1 (via PX domain). {ECO:0000250|UniProtKB:P30048}.
P20801	-1.44967	25.5636	-3.70671	0.00540945	0.0427983	-2.51734	reviewed	TNNC2_MOUSE	Troponin C, skeletal muscle (STNC)	Tnnc2 Tncs	160	regulation of muscle contraction [GO:0006937]; skeletal muscle contraction [GO:0003009]	troponin complex [GO:0005861]	actin binding [GO:0003779]; calcium ion binding [GO:0005509]	troponin complex [GO:0005861]; actin binding [GO:0003779]; calcium ion binding [GO:0005509]; regulation of muscle contraction [GO:0006937]; skeletal muscle contraction [GO:0003009]	GO:0003009; GO:0003779; GO:0005509; GO:0005861; GO:0006937		BINDING 28; /ligand=Ca(2+); /ligand_id=ChEBI:CHEBI:29108; /ligand_label=1; /evidence=ECO:0000255|PROSITE-ProRule:PRU00448; BINDING 30; /ligand=Ca(2+); /ligand_id=ChEBI:CHEBI:29108; /ligand_label=1; /evidence=ECO:0000255|PROSITE-ProRule:PRU00448; BINDING 34; /ligand=Ca(2+); /ligand_id=ChEBI:CHEBI:29108; /ligand_label=1; /evidence=ECO:0000255|PROSITE-ProRule:PRU00448; BINDING 39; /ligand=Ca(2+); /l…	cellular organisms (no rank), Eukaryota (superkingdom), Opisthokonta (clade), Metazoa (kingdom), Eumetazoa (clade), Bilateria (clade), Deuterostomia (clade), Chordata (phylum), Craniata (subphylum), Vertebrata (clade), Gnathostomata (clade), Teleostomi (clade), Euteleostomi (clade), Sarcopterygii (superclass), Dipnotetrapodomorpha (clade), Tetrapoda (clade), Amniota (clade), Mammalia (class), The…	131567 (no rank), 2759 (superkingdom), 33154 (clade), 33208 (kingdom), 6072 (clade), 33213 (clade), 33511 (clade), 7711 (phylum), 89593 (subphylum), 7742 (clade), 7776 (clade), 117570 (clade), 117571 (clade), 8287 (superclass), 1338369 (clade), 32523 (clade), 32524 (clade), 40674 (class), 32525 (clade), 9347 (clade), 1437010 (clade), 314146 (superorder), 314147 (clade), 9989 (order), 1963758 (sub…
P21981	0.661931	23.6369	3.64165	0.00596212	0.0437403	-2.61834	reviewed	TGM2_MOUSE	Protein-glutamine gamma-glutamyltransferase 2 (EC 2.3.2.13) (Isopeptidase TGM2) (EC 3.4.-.-) (Protein-glutamine deamidase TGM2) (EC 3.5.1.44) (Protein-glutamine dopaminyltransferase TGM2) (EC 2.3.1.-) (Protein-glutamine histaminyltransferase TGM2) (EC 2.3.1.-) (Protein-glutamine noradrenalinyltransferase TGM2) (EC 2.3.1.-) (Protein-glutamine serotonyltransferase TGM2) (EC 2.3.1.-) (Tissue transgl…	Tgm2	686	apoptotic cell clearance [GO:0043277]; bone development [GO:0060348]; branching involved in salivary gland morphogenesis [GO:0060445]; cellular response to cocaine [GO:0071314]; cellular response to dopamine [GO:1903351]; cellular response to serotonin [GO:1904015]; dopamine secretion [GO:0014046]; G protein-coupled receptor signaling pathway [GO:0007186]; gene expression [GO:0010467]; negative r…	chromatin [GO:0000785]; collagen-containing extracellular matrix [GO:0062023]; cytoplasm [GO:0005737]; cytosol [GO:0005829]; endoplasmic reticulum [GO:0005783]; extracellular matrix [GO:0031012]; extracellular region [GO:0005576]; membrane [GO:0016020]; mitochondrion [GO:0005739]; nucleosome [GO:0000786]; nucleus [GO:0005634]; plasma membrane [GO:0005886]	calcium ion binding [GO:0005509]; GTP binding [GO:0005525]; histone dopaminyltransferase activity [GO:0120297]; histone serotonyltransferase activity [GO:0120295]; peptidase activity [GO:0008233]; peptide histaminyltransferase activity [GO:0120299]; peptide noradrenalinyltransferase activity [GO:0120298]; protein-glutamine gamma-glutamyltransferase activity [GO:0003810]; protein-glutamine glutami…	chromatin [GO:0000785]; collagen-containing extracellular matrix [GO:0062023]; cytoplasm [GO:0005737]; cytosol [GO:0005829]; endoplasmic reticulum [GO:0005783]; extracellular matrix [GO:0031012]; extracellular region [GO:0005576]; membrane [GO:0016020]; mitochondrion [GO:0005739]; nucleosome [GO:0000786]; nucleus [GO:0005634]; plasma membrane [GO:0005886]; calcium ion binding [GO:0005509]; GTP bi…	GO:0000785; GO:0000786; GO:0003810; GO:0005509; GO:0005525; GO:0005576; GO:0005634; GO:0005737; GO:0005739; GO:0005783; GO:0005829; GO:0005886; GO:0006508; GO:0007186; GO:0007200; GO:0008233; GO:0008483; GO:0010467; GO:0014046; GO:0016020; GO:0018149; GO:0018277; GO:0031012; GO:0032471; GO:0042981; GO:0043065; GO:0043277; GO:0043547; GO:0045785; GO:0050568; GO:0050769; GO:0051057; GO:0051260; GO:…	ACT_SITE 277; /evidence=ECO:0000255|PROSITE-ProRule:PRU10024; ACT_SITE 335; /evidence=ECO:0000255|PROSITE-ProRule:PRU10024; ACT_SITE 358; /evidence=ECO:0000255|PROSITE-ProRule:PRU10024	BINDING 398; /ligand=Ca(2+); /ligand_id=ChEBI:CHEBI:29108; /evidence=ECO:0000250|UniProtKB:P00488; BINDING 400; /ligand=Ca(2+); /ligand_id=ChEBI:CHEBI:29108; /evidence=ECO:0000250|UniProtKB:P00488; BINDING 437; /ligand=Ca(2+); /ligand_id=ChEBI:CHEBI:29108; /evidence=ECO:0000250|UniProtKB:P21980; BINDING 447; /ligand=Ca(2+); /ligand_id=ChEBI:CHEBI:29108; /evidence=ECO:0000250|UniProtKB:P00488; BIN…	cellular organisms (no rank), Eukaryota (superkingdom), Opisthokonta (clade), Metazoa (kingdom), Eumetazoa (clade), Bilateria (clade), Deuterostomia (clade), Chordata (phylum), Craniata (subphylum), Vertebrata (clade), Gnathostomata (clade), Teleostomi (clade), Euteleostomi (clade), Sarcopterygii (superclass), Dipnotetrapodomorpha (clade), Tetrapoda (clade), Amniota (clade), Mammalia (class), The…	131567 (no rank), 2759 (superkingdom), 33154 (clade), 33208 (kingdom), 6072 (clade), 33213 (clade), 33511 (clade), 7711 (phylum), 89593 (subphylum), 7742 (clade), 7776 (clade), 117570 (clade), 117571 (clade), 8287 (superclass), 1338369 (clade), 32523 (clade), 32524 (clade), 40674 (class), 32525 (clade), 9347 (clade), 1437010 (clade), 314146 (superorder), 314147 (clade), 9989 (order), 1963758 (sub…	PTM: Disulfide bond formation inactivates the calcium-dependent acyltransferase activity. Cys-370 can form disulfide bonds with both Cys-230 and Cys-371: formation of a disulfide bond between Cys-230 and Cys-370 facilitates formation of the disulfide between Cys-370 and Cys-371, which promotes inactivation of the acyltransferase activity. May also form interchain disulfids between Cys-230 and Cys…		SUBUNIT: Monomer. Interacts with phospholipase C; promoting alpha-1 adrenergic receptor signaling (By similarity). Interacts with PLCD1 (By similarity). {ECO:0000250|UniProtKB:P21980, ECO:0000250|UniProtKB:Q9WVJ6}.
P23927	1.5674	26.9799	5.07925	0.000799458	0.0157357	-0.514829	reviewed	CRYAB_MOUSE	Alpha-crystallin B chain (Alpha(B)-crystallin) (P23)	Cryab Crya2	175	apoptotic process involved in morphogenesis [GO:0060561]; camera-type eye development [GO:0043010]; cellular response to gamma radiation [GO:0071480]; lens development in camera-type eye [GO:0002088]; microtubule polymerization or depolymerization [GO:0031109]; muscle organ development [GO:0007517]; negative regulation of amyloid fibril formation [GO:1905907]; negative regulation of apoptotic pro…	actin filament bundle [GO:0032432]; axon [GO:0030424]; cardiac myofibril [GO:0097512]; cell surface [GO:0009986]; contractile muscle fiber [GO:0043292]; cytosol [GO:0005829]; dendritic spine [GO:0043197]; extracellular region [GO:0005576]; lysosome [GO:0005764]; M band [GO:0031430]; mitochondrion [GO:0005739]; myelin sheath [GO:0043209]; nucleus [GO:0005634]; perikaryon [GO:0043204]; plasma membr…	amyloid-beta binding [GO:0001540]; metal ion binding [GO:0046872]; microtubule binding [GO:0008017]; protein homodimerization activity [GO:0042803]; protein-containing complex binding [GO:0044877]; structural constituent of eye lens [GO:0005212]; unfolded protein binding [GO:0051082]	actin filament bundle [GO:0032432]; axon [GO:0030424]; cardiac myofibril [GO:0097512]; cell surface [GO:0009986]; contractile muscle fiber [GO:0043292]; cytosol [GO:0005829]; dendritic spine [GO:0043197]; extracellular region [GO:0005576]; lysosome [GO:0005764]; M band [GO:0031430]; mitochondrion [GO:0005739]; myelin sheath [GO:0043209]; nucleus [GO:0005634]; perikaryon [GO:0043204]; plasma membr…	GO:0001540; GO:0001666; GO:0002088; GO:0005212; GO:0005576; GO:0005634; GO:0005739; GO:0005764; GO:0005829; GO:0005886; GO:0006457; GO:0007021; GO:0007517; GO:0008017; GO:0009986; GO:0010629; GO:0030018; GO:0030308; GO:0030424; GO:0031109; GO:0031333; GO:0031430; GO:0032355; GO:0032387; GO:0032432; GO:0032991; GO:0042542; GO:0042803; GO:0043010; GO:0043066; GO:0043067; GO:0043197; GO:0043204; GO:…		BINDING 83; /ligand=Zn(2+); /ligand_id=ChEBI:CHEBI:29105; /ligand_label=1; /evidence=ECO:0000250; BINDING 104; /ligand=Zn(2+); /ligand_id=ChEBI:CHEBI:29105; /ligand_label=2; /evidence=ECO:0000250; BINDING 106; /ligand=Zn(2+); /ligand_id=ChEBI:CHEBI:29105; /ligand_label=2; /evidence=ECO:0000250; BINDING 111; /ligand=Zn(2+); /ligand_id=ChEBI:CHEBI:29105; /ligand_label=1; /evidence=ECO:0000250; BIND…	cellular organisms (no rank), Eukaryota (superkingdom), Opisthokonta (clade), Metazoa (kingdom), Eumetazoa (clade), Bilateria (clade), Deuterostomia (clade), Chordata (phylum), Craniata (subphylum), Vertebrata (clade), Gnathostomata (clade), Teleostomi (clade), Euteleostomi (clade), Sarcopterygii (superclass), Dipnotetrapodomorpha (clade), Tetrapoda (clade), Amniota (clade), Mammalia (class), The…	131567 (no rank), 2759 (superkingdom), 33154 (clade), 33208 (kingdom), 6072 (clade), 33213 (clade), 33511 (clade), 7711 (phylum), 89593 (subphylum), 7742 (clade), 7776 (clade), 117570 (clade), 117571 (clade), 8287 (superclass), 1338369 (clade), 32523 (clade), 32524 (clade), 40674 (class), 32525 (clade), 9347 (clade), 1437010 (clade), 314146 (superorder), 314147 (clade), 9989 (order), 1963758 (sub…		P42227; P07320	SUBUNIT: Heteromer composed of three CRYAA and one CRYAB subunits. Aggregates with homologous proteins, including the small heat shock protein HSPB1, to form large heteromeric complexes. Inter-subunit bridging via zinc ions enhances stability, which is crucial as there is no protein turn over in the lens (By similarity). Interacts with HSPBAP1 (PubMed:10751411). Interacts with TTN/titin. Interact…
P31001	0.78425	29.5983	4.44143	0.0018788	0.0244547	-1.4127	reviewed	DESM_MOUSE	Desmin	Des	469	intermediate filament organization [GO:0045109]; muscle organ development [GO:0007517]; nuclear envelope organization [GO:0006998]	cardiac myofibril [GO:0097512]; cell tip [GO:0051286]; cell-cell junction [GO:0005911]; contractile muscle fiber [GO:0043292]; cytoplasm [GO:0005737]; cytoskeleton [GO:0005856]; fascia adherens [GO:0005916]; intermediate filament [GO:0005882]; neuromuscular junction [GO:0031594]; nuclear envelope [GO:0005635]; nucleus [GO:0005634]; sarcolemma [GO:0042383]; Z disc [GO:0030018]	cytoskeletal protein binding [GO:0008092]; identical protein binding [GO:0042802]; structural constituent of cytoskeleton [GO:0005200]	cardiac myofibril [GO:0097512]; cell tip [GO:0051286]; cell-cell junction [GO:0005911]; contractile muscle fiber [GO:0043292]; cytoplasm [GO:0005737]; cytoskeleton [GO:0005856]; fascia adherens [GO:0005916]; intermediate filament [GO:0005882]; neuromuscular junction [GO:0031594]; nuclear envelope [GO:0005635]; nucleus [GO:0005634]; sarcolemma [GO:0042383]; Z disc [GO:0030018]; cytoskeletal protei…	GO:0005200; GO:0005634; GO:0005635; GO:0005737; GO:0005856; GO:0005882; GO:0005911; GO:0005916; GO:0006998; GO:0007517; GO:0008092; GO:0030018; GO:0031594; GO:0042383; GO:0042802; GO:0043292; GO:0045109; GO:0051286; GO:0097512			cellular organisms (no rank), Eukaryota (superkingdom), Opisthokonta (clade), Metazoa (kingdom), Eumetazoa (clade), Bilateria (clade), Deuterostomia (clade), Chordata (phylum), Craniata (subphylum), Vertebrata (clade), Gnathostomata (clade), Teleostomi (clade), Euteleostomi (clade), Sarcopterygii (superclass), Dipnotetrapodomorpha (clade), Tetrapoda (clade), Amniota (clade), Mammalia (class), The…	131567 (no rank), 2759 (superkingdom), 33154 (clade), 33208 (kingdom), 6072 (clade), 33213 (clade), 33511 (clade), 7711 (phylum), 89593 (subphylum), 7742 (clade), 7776 (clade), 117570 (clade), 117571 (clade), 8287 (superclass), 1338369 (clade), 32523 (clade), 32524 (clade), 40674 (class), 32525 (clade), 9347 (clade), 1437010 (clade), 314146 (superorder), 314147 (clade), 9989 (order), 1963758 (sub…	PTM: ADP-ribosylation prevents ability to form intermediate filaments. {ECO:0000250|UniProtKB:P48675}.; PTM: Phosphorylation at Ser-7, Ser-28 and Ser-32 by CDK1, phosphorylation at Ser-60 by AURKB and phosphorylation at Thr-76 by ROCK1 contribute to efficient separation of desmin intermediate filaments during mitosis. {ECO:0000269|PubMed:27565725}.; PTM: Ubiquitination by a SCF-like complex conta…	Q9Z2C5; Q9UBX2; Q13496	SUBUNIT: Homomer (By similarity). Interacts with MTM1 (By similarity). Interacts with DST (PubMed:10357897). Interacts with tubulin-alpha; specifically associates with detyrosinated tubulin-alpha (PubMed:27102488). Interacts with EPPK1; interaction is dependent of higher-order structure of intermediate filament. Interacts with CRYAB (By similarity). Interacts with NEB (via nebulin repeats 160-164…
P35385	3.20541	24.472	10	5.60028e-06	0.00109529	4.63726	reviewed	HSPB7_MOUSE	Heat shock protein beta-7 (HspB7) (Cardiovascular heat shock protein) (cvHsp) (Heat shock protein 25 kDa 2) (Protein p19/6.8)	Hspb7 Cvhsp Hsp25-2	169	heart development [GO:0007507]	actin cytoskeleton [GO:0015629]; aggresome [GO:0016235]; Cajal body [GO:0015030]; mitochondrion [GO:0005739]; nucleus [GO:0005634]	filamin binding [GO:0031005]	actin cytoskeleton [GO:0015629]; aggresome [GO:0016235]; Cajal body [GO:0015030]; mitochondrion [GO:0005739]; nucleus [GO:0005634]; filamin binding [GO:0031005]; heart development [GO:0007507]	GO:0005634; GO:0005739; GO:0007507; GO:0015030; GO:0015629; GO:0016235; GO:0031005			cellular organisms (no rank), Eukaryota (superkingdom), Opisthokonta (clade), Metazoa (kingdom), Eumetazoa (clade), Bilateria (clade), Deuterostomia (clade), Chordata (phylum), Craniata (subphylum), Vertebrata (clade), Gnathostomata (clade), Teleostomi (clade), Euteleostomi (clade), Sarcopterygii (superclass), Dipnotetrapodomorpha (clade), Tetrapoda (clade), Amniota (clade), Mammalia (class), The…	131567 (no rank), 2759 (superkingdom), 33154 (clade), 33208 (kingdom), 6072 (clade), 33213 (clade), 33511 (clade), 7711 (phylum), 89593 (subphylum), 7742 (clade), 7776 (clade), 117570 (clade), 117571 (clade), 8287 (superclass), 1338369 (clade), 32523 (clade), 32524 (clade), 40674 (class), 32525 (clade), 9347 (clade), 1437010 (clade), 314146 (superorder), 314147 (clade), 9989 (order), 1963758 (sub…			SUBUNIT: Interacts with C-terminal domain of actin-binding protein 280.
P40142	0.839428	21.9739	4.39218	0.0020119	0.0255019	-1.48448	reviewed	TKT_MOUSE	Transketolase (TK) (EC 2.2.1.1) (P68)	Tkt	623	glyceraldehyde-3-phosphate biosynthetic process [GO:0046166]; pentose-phosphate shunt [GO:0006098]; pentose-phosphate shunt, non-oxidative branch [GO:0009052]; regulation of growth [GO:0040008]; xylulose 5-phosphate biosynthetic process [GO:1901159]	cytosol [GO:0005829]; myelin sheath [GO:0043209]; nuclear body [GO:0016604]	calcium ion binding [GO:0005509]; magnesium ion binding [GO:0000287]; protein homodimerization activity [GO:0042803]; transketolase activity [GO:0004802]	cytosol [GO:0005829]; myelin sheath [GO:0043209]; nuclear body [GO:0016604]; calcium ion binding [GO:0005509]; magnesium ion binding [GO:0000287]; protein homodimerization activity [GO:0042803]; transketolase activity [GO:0004802]; glyceraldehyde-3-phosphate biosynthetic process [GO:0046166]; pentose-phosphate shunt [GO:0006098]; pentose-phosphate shunt, non-oxidative branch [GO:0009052]; regulat…	GO:0000287; GO:0004802; GO:0005509; GO:0005829; GO:0006098; GO:0009052; GO:0016604; GO:0040008; GO:0042803; GO:0043209; GO:0046166; GO:1901159	ACT_SITE 366; /note=Proton donor; /evidence=ECO:0000250	BINDING 37; /ligand=substrate; /evidence=ECO:0000250; BINDING 40; /ligand=thiamine diphosphate; /ligand_id=ChEBI:CHEBI:58937; /evidence=ECO:0000250; BINDING 77; /ligand=thiamine diphosphate; /ligand_id=ChEBI:CHEBI:58937; /evidence=ECO:0000250; BINDING 123..125; /ligand=thiamine diphosphate; /ligand_id=ChEBI:CHEBI:58937; /evidence=ECO:0000250; BINDING 155; /ligand=Mg(2+); /ligand_id=ChEBI:CHEBI:18…	cellular organisms (no rank), Eukaryota (superkingdom), Opisthokonta (clade), Metazoa (kingdom), Eumetazoa (clade), Bilateria (clade), Deuterostomia (clade), Chordata (phylum), Craniata (subphylum), Vertebrata (clade), Gnathostomata (clade), Teleostomi (clade), Euteleostomi (clade), Sarcopterygii (superclass), Dipnotetrapodomorpha (clade), Tetrapoda (clade), Amniota (clade), Mammalia (class), The…	131567 (no rank), 2759 (superkingdom), 33154 (clade), 33208 (kingdom), 6072 (clade), 33213 (clade), 33511 (clade), 7711 (phylum), 89593 (subphylum), 7742 (clade), 7776 (clade), 117570 (clade), 117571 (clade), 8287 (superclass), 1338369 (clade), 32523 (clade), 32524 (clade), 40674 (class), 32525 (clade), 9347 (clade), 1437010 (clade), 314146 (superorder), 314147 (clade), 9989 (order), 1963758 (sub…			SUBUNIT: Homodimer. {ECO:0000250}.
P43274	0.711483	25.4567	4.67869	0.00135778	0.0213653	-1.07174	reviewed	H14_MOUSE	Histone H1.4 (H1 VAR.2) (H1e)	H1-4 H1f4 Hist1h1e	219	chromatin organization [GO:0006325]; negative regulation of transcription by RNA polymerase II [GO:0000122]; nucleosome assembly [GO:0006334]; regulation of transcription by RNA polymerase II [GO:0006357]	heterochromatin [GO:0000792]; nucleosome [GO:0000786]; nucleus [GO:0005634]	ADP binding [GO:0043531]; AMP binding [GO:0016208]; ATP binding [GO:0005524]; calcium ion binding [GO:0005509]; chromatin DNA binding [GO:0031490]; dATP binding [GO:0032564]; DNA binding [GO:0003677]; double-stranded DNA binding [GO:0003690]; GTP binding [GO:0005525]; histone deacetylase binding [GO:0042826]; structural constituent of chromatin [GO:0030527]	heterochromatin [GO:0000792]; nucleosome [GO:0000786]; nucleus [GO:0005634]; ADP binding [GO:0043531]; AMP binding [GO:0016208]; ATP binding [GO:0005524]; calcium ion binding [GO:0005509]; chromatin DNA binding [GO:0031490]; dATP binding [GO:0032564]; DNA binding [GO:0003677]; double-stranded DNA binding [GO:0003690]; GTP binding [GO:0005525]; histone deacetylase binding [GO:0042826]; structural …	GO:0000122; GO:0000786; GO:0000792; GO:0003677; GO:0003690; GO:0005509; GO:0005524; GO:0005525; GO:0005634; GO:0006325; GO:0006334; GO:0006357; GO:0016208; GO:0030527; GO:0031490; GO:0032564; GO:0042826; GO:0043531			cellular organisms (no rank), Eukaryota (superkingdom), Opisthokonta (clade), Metazoa (kingdom), Eumetazoa (clade), Bilateria (clade), Deuterostomia (clade), Chordata (phylum), Craniata (subphylum), Vertebrata (clade), Gnathostomata (clade), Teleostomi (clade), Euteleostomi (clade), Sarcopterygii (superclass), Dipnotetrapodomorpha (clade), Tetrapoda (clade), Amniota (clade), Mammalia (class), The…	131567 (no rank), 2759 (superkingdom), 33154 (clade), 33208 (kingdom), 6072 (clade), 33213 (clade), 33511 (clade), 7711 (phylum), 89593 (subphylum), 7742 (clade), 7776 (clade), 117570 (clade), 117571 (clade), 8287 (superclass), 1338369 (clade), 32523 (clade), 32524 (clade), 40674 (class), 32525 (clade), 9347 (clade), 1437010 (clade), 314146 (superorder), 314147 (clade), 9989 (order), 1963758 (sub…	PTM: Citrullination at Arg-54 (H1R54ci) by PADI4 takes place within the DNA-binding site of H1 and results in its displacement from chromatin and global chromatin decondensation, thereby promoting pluripotency and stem cell maintenance. {ECO:0000269|PubMed:24463520}.; PTM: ADP-ribosylated on Ser-55, Ser-113 and Ser-150 in response to DNA damage. {ECO:0000250|UniProtKB:P10412}.; PTM: H1 histones a…
P48678	0.998365	27.1516	4.72372	0.00127781	0.0210448	-1.00797	reviewed	LMNA_MOUSE	Prelamin-A/C [Cleaved into: Lamin-A/C]	Lmna Lmn1	665	cellular response to hypoxia [GO:0071456]; cellular senescence [GO:0090398]; DNA double-strand break attachment to nuclear envelope [GO:1990683]; establishment of cell polarity [GO:0030010]; establishment or maintenance of microtubule cytoskeleton polarity [GO:0030951]; muscle organ development [GO:0007517]; negative regulation of cardiac muscle hypertrophy in response to stress [GO:1903243]; neg…	lamin filament [GO:0005638]; nuclear envelope [GO:0005635]; nuclear lamina [GO:0005652]; nuclear matrix [GO:0016363]; nuclear membrane [GO:0031965]; nuclear speck [GO:0016607]; nucleoplasm [GO:0005654]; nucleus [GO:0005634]; perinuclear region of cytoplasm [GO:0048471]; site of double-strand break [GO:0035861]	structural constituent of nuclear lamina [GO:0160123]	lamin filament [GO:0005638]; nuclear envelope [GO:0005635]; nuclear lamina [GO:0005652]; nuclear matrix [GO:0016363]; nuclear membrane [GO:0031965]; nuclear speck [GO:0016607]; nucleoplasm [GO:0005654]; nucleus [GO:0005634]; perinuclear region of cytoplasm [GO:0048471]; site of double-strand break [GO:0035861]; structural constituent of nuclear lamina [GO:0160123]; cellular response to hypoxia [G…	GO:0005634; GO:0005635; GO:0005638; GO:0005652; GO:0005654; GO:0006606; GO:0006997; GO:0006998; GO:0007517; GO:0010628; GO:0016363; GO:0016607; GO:0030010; GO:0030334; GO:0030951; GO:0031647; GO:0031965; GO:0034504; GO:0035861; GO:0048471; GO:0055015; GO:0071456; GO:0072201; GO:0090201; GO:0090398; GO:0160123; GO:1900180; GO:1903243; GO:1990683; GO:2001237			cellular organisms (no rank), Eukaryota (superkingdom), Opisthokonta (clade), Metazoa (kingdom), Eumetazoa (clade), Bilateria (clade), Deuterostomia (clade), Chordata (phylum), Craniata (subphylum), Vertebrata (clade), Gnathostomata (clade), Teleostomi (clade), Euteleostomi (clade), Sarcopterygii (superclass), Dipnotetrapodomorpha (clade), Tetrapoda (clade), Amniota (clade), Mammalia (class), The…	131567 (no rank), 2759 (superkingdom), 33154 (clade), 33208 (kingdom), 6072 (clade), 33213 (clade), 33511 (clade), 7711 (phylum), 89593 (subphylum), 7742 (clade), 7776 (clade), 117570 (clade), 117571 (clade), 8287 (superclass), 1338369 (clade), 32523 (clade), 32524 (clade), 40674 (class), 32525 (clade), 9347 (clade), 1437010 (clade), 314146 (superorder), 314147 (clade), 9989 (order), 1963758 (sub…	PTM: Proteolytic cleavage of the C-terminal of 18 residues of prelamin-A/C results in the production of lamin-A/C (PubMed:17652517). The prelamin-A/C maturation pathway includes farnesylation of CAAX motif by protein farnesyltransferase (FNTA and FNTB), removal of the last three amino acids (-AAX) by RCE1/FACE2 and/or ZMPSTE24, methylation of the C-terminal cysteine by ICMT and endoproteolytic re…		SUBUNIT: Homodimer of lamin A and lamin C (PubMed:28241138). Lamin dimers then assemble into dimeric head-to-tail polymers (PubMed:28241138). Ultimately, two head-to-tail polymers assemble laterally into a protofilament with a uniformly shaped rod of 3.5 nm in diameter (PubMed:28241138). Interacts with lamin-associated polypeptides IA, IB and TMPO-alpha, RB1 and with emerin (By similarity). Prote…
P48962	-0.672869	29.9342	-3.54665	0.00687899	0.0440583	-2.76661	reviewed	ADT1_MOUSE	ADP/ATP translocase 1 (ADP,ATP carrier protein 1) (ADP,ATP carrier protein, heart/skeletal muscle isoform T1) (Adenine nucleotide translocator 1) (ANT 1) (Solute carrier family 25 member 4)	Slc25a4 Aac1 Anc1 Ant1	298	adaptive thermogenesis [GO:1990845]; ADP transport [GO:0015866]; apoptotic mitochondrial changes [GO:0008637]; mitochondrial ADP transmembrane transport [GO:0140021]; mitochondrial ATP transmembrane transport [GO:1990544]; negative regulation of necroptotic process [GO:0060546]; positive regulation of mitophagy [GO:1901526]; regulation of mitochondrial membrane permeability [GO:0046902]	mitochondrial inner membrane [GO:0005743]; mitochondrial membrane [GO:0031966]; mitochondrial outer membrane [GO:0005741]; mitochondrial permeability transition pore complex [GO:0005757]; mitochondrion [GO:0005739]; myelin sheath [GO:0043209]	ATP:ADP antiporter activity [GO:0005471]; oxidative phosphorylation uncoupler activity [GO:0017077]; proton transmembrane transporter activity [GO:0015078]	mitochondrial inner membrane [GO:0005743]; mitochondrial membrane [GO:0031966]; mitochondrial outer membrane [GO:0005741]; mitochondrial permeability transition pore complex [GO:0005757]; mitochondrion [GO:0005739]; myelin sheath [GO:0043209]; ATP:ADP antiporter activity [GO:0005471]; oxidative phosphorylation uncoupler activity [GO:0017077]; proton transmembrane transporter activity [GO:0015078]…	GO:0005471; GO:0005739; GO:0005741; GO:0005743; GO:0005757; GO:0008637; GO:0015078; GO:0015866; GO:0017077; GO:0031966; GO:0043209; GO:0046902; GO:0060546; GO:0140021; GO:1901526; GO:1990544; GO:1990845		BINDING 80; /ligand=ADP; /ligand_id=ChEBI:CHEBI:456216; /evidence=ECO:0000250|UniProtKB:P02722; BINDING 92; /ligand=ADP; /ligand_id=ChEBI:CHEBI:456216; /evidence=ECO:0000250|UniProtKB:P02722; BINDING 235; /ligand=ADP; /ligand_id=ChEBI:CHEBI:456216; /evidence=ECO:0000250|UniProtKB:P02722	cellular organisms (no rank), Eukaryota (superkingdom), Opisthokonta (clade), Metazoa (kingdom), Eumetazoa (clade), Bilateria (clade), Deuterostomia (clade), Chordata (phylum), Craniata (subphylum), Vertebrata (clade), Gnathostomata (clade), Teleostomi (clade), Euteleostomi (clade), Sarcopterygii (superclass), Dipnotetrapodomorpha (clade), Tetrapoda (clade), Amniota (clade), Mammalia (class), The…	131567 (no rank), 2759 (superkingdom), 33154 (clade), 33208 (kingdom), 6072 (clade), 33213 (clade), 33511 (clade), 7711 (phylum), 89593 (subphylum), 7742 (clade), 7776 (clade), 117570 (clade), 117571 (clade), 8287 (superclass), 1338369 (clade), 32523 (clade), 32524 (clade), 40674 (class), 32525 (clade), 9347 (clade), 1437010 (clade), 314146 (superorder), 314147 (clade), 9989 (order), 1963758 (sub…	PTM: Under cell death induction, transglutaminated by TGM2 (PubMed:19644512). Transglutamination leads to formation of covalent cross-links between a glutamine and the epsilon-amino group of a lysine residue, forming polymers (PubMed:19644512). {ECO:0000269|PubMed:19644512}.		SUBUNIT: Monomer (By similarity). Found in a complex with ARL2, ARL2BP and SLC25A4/ANT1 (PubMed:11809823). Interacts with ARL2BP (PubMed:11809823). Interacts with TIMM44; leading to inhibit the presequence translocase TIMM23, thereby promoting stabilization of PINK1 (PubMed:31618756). {ECO:0000250|UniProtKB:G2QNH0, ECO:0000250|UniProtKB:P02722, ECO:0000269|PubMed:11809823, ECO:0000269|PubMed:3161…
P49312	0.840314	22.4551	5.49469	0.000472845	0.0115632	0.0377777	reviewed	ROA1_MOUSE	Heterogeneous nuclear ribonucleoprotein A1 (hnRNP A1) (HDP-1) (Helix-destabilizing protein) (Single-strand-binding protein) (Topoisomerase-inhibitor suppressed) (hnRNP core protein A1) [Cleaved into: Heterogeneous nuclear ribonucleoprotein A1, N-terminally processed]	Hnrnpa1 Fli-2 Hnrpa1 Tis	320	alternative mRNA splicing, via spliceosome [GO:0000380]; cellular response to sodium arsenite [GO:1903936]; import into nucleus [GO:0051170]; mRNA transport [GO:0051028]; nuclear export [GO:0051168]; RNA splicing [GO:0008380]	cytoplasm [GO:0005737]; nucleoplasm [GO:0005654]; nucleus [GO:0005634]; ribonucleoprotein complex [GO:1990904]; spliceosomal complex [GO:0005681]; synapse [GO:0045202]	miRNA binding [GO:0035198]; single-stranded DNA binding [GO:0003697]	cytoplasm [GO:0005737]; nucleoplasm [GO:0005654]; nucleus [GO:0005634]; ribonucleoprotein complex [GO:1990904]; spliceosomal complex [GO:0005681]; synapse [GO:0045202]; miRNA binding [GO:0035198]; single-stranded DNA binding [GO:0003697]; alternative mRNA splicing, via spliceosome [GO:0000380]; cellular response to sodium arsenite [GO:1903936]; import into nucleus [GO:0051170]; mRNA transport [GO…	GO:0000380; GO:0003697; GO:0005634; GO:0005654; GO:0005681; GO:0005737; GO:0008380; GO:0035198; GO:0045202; GO:0051028; GO:0051168; GO:0051170; GO:1903936; GO:1990904			cellular organisms (no rank), Eukaryota (superkingdom), Opisthokonta (clade), Metazoa (kingdom), Eumetazoa (clade), Bilateria (clade), Deuterostomia (clade), Chordata (phylum), Craniata (subphylum), Vertebrata (clade), Gnathostomata (clade), Teleostomi (clade), Euteleostomi (clade), Sarcopterygii (superclass), Dipnotetrapodomorpha (clade), Tetrapoda (clade), Amniota (clade), Mammalia (class), The…	131567 (no rank), 2759 (superkingdom), 33154 (clade), 33208 (kingdom), 6072 (clade), 33213 (clade), 33511 (clade), 7711 (phylum), 89593 (subphylum), 7742 (clade), 7776 (clade), 117570 (clade), 117571 (clade), 8287 (superclass), 1338369 (clade), 32523 (clade), 32524 (clade), 40674 (class), 32525 (clade), 9347 (clade), 1437010 (clade), 314146 (superorder), 314147 (clade), 9989 (order), 1963758 (sub…	PTM: Sumoylated. {ECO:0000250}.		SUBUNIT: Identified in the spliceosome C complex. Identified in a IGF2BP1-dependent mRNP granule complex containing untranslated mRNAs. Interacts with SEPT6. Interacts with C9orf72. Interacts with KHDRBS1. Interacts with UBQLN2 (By similarity). Interacts with PPIA/CYPA (By similarity). {ECO:0000250|UniProtKB:P09651}.
P49813	-0.855631	23.3513	-3.67989	0.00563039	0.0429382	-2.55892	reviewed	TMOD1_MOUSE	Tropomodulin-1 (Erythrocyte tropomodulin) (E-Tmod)	Tmod1 Tmod	359	adult locomotory behavior [GO:0008344]; lens fiber cell development [GO:0070307]; muscle contraction [GO:0006936]; myofibril assembly [GO:0030239]; pointed-end actin filament capping [GO:0051694]	actin filament [GO:0005884]; COP9 signalosome [GO:0008180]; cortical cytoskeleton [GO:0030863]; cytoskeleton [GO:0005856]; membrane [GO:0016020]; myofibril [GO:0030016]; sarcomere [GO:0030017]; striated muscle thin filament [GO:0005865]	actin binding [GO:0003779]; tropomyosin binding [GO:0005523]	actin filament [GO:0005884]; COP9 signalosome [GO:0008180]; cortical cytoskeleton [GO:0030863]; cytoskeleton [GO:0005856]; membrane [GO:0016020]; myofibril [GO:0030016]; sarcomere [GO:0030017]; striated muscle thin filament [GO:0005865]; actin binding [GO:0003779]; tropomyosin binding [GO:0005523]; adult locomotory behavior [GO:0008344]; lens fiber cell development [GO:0070307]; muscle contractio…	GO:0003779; GO:0005523; GO:0005856; GO:0005865; GO:0005884; GO:0006936; GO:0008180; GO:0008344; GO:0016020; GO:0030016; GO:0030017; GO:0030239; GO:0030863; GO:0051694; GO:0070307			cellular organisms (no rank), Eukaryota (superkingdom), Opisthokonta (clade), Metazoa (kingdom), Eumetazoa (clade), Bilateria (clade), Deuterostomia (clade), Chordata (phylum), Craniata (subphylum), Vertebrata (clade), Gnathostomata (clade), Teleostomi (clade), Euteleostomi (clade), Sarcopterygii (superclass), Dipnotetrapodomorpha (clade), Tetrapoda (clade), Amniota (clade), Mammalia (class), The…	131567 (no rank), 2759 (superkingdom), 33154 (clade), 33208 (kingdom), 6072 (clade), 33213 (clade), 33511 (clade), 7711 (phylum), 89593 (subphylum), 7742 (clade), 7776 (clade), 117570 (clade), 117571 (clade), 8287 (superclass), 1338369 (clade), 32523 (clade), 32524 (clade), 40674 (class), 32525 (clade), 9347 (clade), 1437010 (clade), 314146 (superorder), 314147 (clade), 9989 (order), 1963758 (sub…			SUBUNIT: Binds to the N-terminus of tropomyosin and to actin. Interacts with FLII. {ECO:0000250|UniProtKB:P70567}.
P50462	5.33831	23.4409	3.51686	0.00719636	0.0453708	-2.8133	reviewed	CSRP3_MOUSE	Cysteine and glycine-rich protein 3 (Cysteine-rich protein 3) (CRP3) (LIM domain protein, cardiac) (Muscle LIM protein)	Csrp3 Clp Mlp	194	cardiac muscle contraction [GO:0060048]; cardiac muscle hypertrophy [GO:0003300]; cardiac muscle tissue development [GO:0048738]; cardiac myofibril assembly [GO:0055003]; detection of muscle stretch [GO:0035995]; glucose homeostasis [GO:0042593]; heart development [GO:0007507]; inflammatory response [GO:0006954]; insulin receptor signaling pathway [GO:0008286]; intracellular calcium ion homeostas…	cytoplasm [GO:0005737]; cytoskeleton [GO:0005856]; cytosol [GO:0005829]; nucleoplasm [GO:0005654]; nucleus [GO:0005634]; Z disc [GO:0030018]	actin binding [GO:0003779]; actinin binding [GO:0042805]; identical protein binding [GO:0042802]; metal ion binding [GO:0046872]; MRF binding [GO:0043426]; RNA polymerase II-specific DNA-binding transcription factor binding [GO:0061629]; structural constituent of muscle [GO:0008307]; telethonin binding [GO:0031433]	cytoplasm [GO:0005737]; cytoskeleton [GO:0005856]; cytosol [GO:0005829]; nucleoplasm [GO:0005654]; nucleus [GO:0005634]; Z disc [GO:0030018]; actin binding [GO:0003779]; actinin binding [GO:0042805]; identical protein binding [GO:0042802]; metal ion binding [GO:0046872]; MRF binding [GO:0043426]; RNA polymerase II-specific DNA-binding transcription factor binding [GO:0061629]; structural constitu…	GO:0002026; GO:0003300; GO:0003779; GO:0005634; GO:0005654; GO:0005737; GO:0005829; GO:0005856; GO:0006874; GO:0006954; GO:0007507; GO:0007517; GO:0008286; GO:0008307; GO:0010831; GO:0030018; GO:0031433; GO:0033292; GO:0033365; GO:0035995; GO:0042593; GO:0042802; GO:0042805; GO:0043426; GO:0045662; GO:0045663; GO:0045944; GO:0046716; GO:0046872; GO:0048738; GO:0055003; GO:0060048; GO:0061629; GO:…			cellular organisms (no rank), Eukaryota (superkingdom), Opisthokonta (clade), Metazoa (kingdom), Eumetazoa (clade), Bilateria (clade), Deuterostomia (clade), Chordata (phylum), Craniata (subphylum), Vertebrata (clade), Gnathostomata (clade), Teleostomi (clade), Euteleostomi (clade), Sarcopterygii (superclass), Dipnotetrapodomorpha (clade), Tetrapoda (clade), Amniota (clade), Mammalia (class), The…	131567 (no rank), 2759 (superkingdom), 33154 (clade), 33208 (kingdom), 6072 (clade), 33213 (clade), 33511 (clade), 7711 (phylum), 89593 (subphylum), 7742 (clade), 7776 (clade), 117570 (clade), 117571 (clade), 8287 (superclass), 1338369 (clade), 32523 (clade), 32524 (clade), 40674 (class), 32525 (clade), 9347 (clade), 1437010 (clade), 314146 (superorder), 314147 (clade), 9989 (order), 1963758 (sub…	PTM: Phosphorylated by PKC/PRKCA. {ECO:0000250|UniProtKB:P50461}.		SUBUNIT: Self-associates. Oligomeric in the cytoplasm and monomeric in the nucleus. Homooligomers preferentially form along the actin cytoskeleton (By similarity). Interacts with TCAP (PubMed:20044516). Interacts with LDHD, MYOD1, MYOG, ACTN2, NRAP, MYF6 (By similarity). Interacts (via N-terminus)D with GLRX3 (via C-terminus) and PPP3CA; GLRX3 and calcineurin compete for interaction with CSRP3 (P…
P50544	-0.775287	26.4354	-3.77198	0.00490922	0.0405937	-2.41647	reviewed	ACADV_MOUSE	Very long-chain specific acyl-CoA dehydrogenase, mitochondrial (EC 1.3.8.9) (MVLCAD) (VLCAD)	Acadvl Vlcad	656	epithelial cell differentiation [GO:0030855]; fatty acid beta-oxidation using acyl-CoA dehydrogenase [GO:0033539]; fatty acid catabolic process [GO:0009062]; negative regulation of fatty acid biosynthetic process [GO:0045717]; negative regulation of fatty acid oxidation [GO:0046322]; regulation of cholesterol metabolic process [GO:0090181]; response to cold [GO:0009409]; temperature homeostasis […	mitochondrial inner membrane [GO:0005743]; mitochondrial nucleoid [GO:0042645]; mitochondrion [GO:0005739]; nucleolus [GO:0005730]; nucleoplasm [GO:0005654]	acyl-CoA dehydrogenase activity [GO:0003995]; flavin adenine dinucleotide binding [GO:0050660]; identical protein binding [GO:0042802]; long-chain fatty acyl-CoA dehydrogenase activity [GO:0004466]; very-long-chain fatty acyl-CoA dehydrogenase activity [GO:0017099]	mitochondrial inner membrane [GO:0005743]; mitochondrial nucleoid [GO:0042645]; mitochondrion [GO:0005739]; nucleolus [GO:0005730]; nucleoplasm [GO:0005654]; acyl-CoA dehydrogenase activity [GO:0003995]; flavin adenine dinucleotide binding [GO:0050660]; identical protein binding [GO:0042802]; long-chain fatty acyl-CoA dehydrogenase activity [GO:0004466]; very-long-chain fatty acyl-CoA dehydrogena…	GO:0001659; GO:0003995; GO:0004466; GO:0005654; GO:0005730; GO:0005739; GO:0005743; GO:0009062; GO:0009409; GO:0017099; GO:0030855; GO:0033539; GO:0042645; GO:0042802; GO:0045717; GO:0046322; GO:0050660; GO:0090181	ACT_SITE 463; /note=Proton acceptor; /evidence=ECO:0000250|UniProtKB:P49748	BINDING 215..224; /ligand=FAD; /ligand_id=ChEBI:CHEBI:57692; /evidence=ECO:0000250|UniProtKB:P49748; BINDING 250..252; /ligand=FAD; /ligand_id=ChEBI:CHEBI:57692; /evidence=ECO:0000250|UniProtKB:P49748; BINDING 462..464; /ligand=substrate; /evidence=ECO:0000250|UniProtKB:P49748; BINDING 465..467; /ligand=FAD; /ligand_id=ChEBI:CHEBI:57692; /evidence=ECO:0000250|UniProtKB:P49748; BINDING 563; /ligan…	cellular organisms (no rank), Eukaryota (superkingdom), Opisthokonta (clade), Metazoa (kingdom), Eumetazoa (clade), Bilateria (clade), Deuterostomia (clade), Chordata (phylum), Craniata (subphylum), Vertebrata (clade), Gnathostomata (clade), Teleostomi (clade), Euteleostomi (clade), Sarcopterygii (superclass), Dipnotetrapodomorpha (clade), Tetrapoda (clade), Amniota (clade), Mammalia (class), The…	131567 (no rank), 2759 (superkingdom), 33154 (clade), 33208 (kingdom), 6072 (clade), 33213 (clade), 33511 (clade), 7711 (phylum), 89593 (subphylum), 7742 (clade), 7776 (clade), 117570 (clade), 117571 (clade), 8287 (superclass), 1338369 (clade), 32523 (clade), 32524 (clade), 40674 (class), 32525 (clade), 9347 (clade), 1437010 (clade), 314146 (superorder), 314147 (clade), 9989 (order), 1963758 (sub…	PTM: S-nitrosylation at Cys-238 in liver improves catalytic efficiency. {ECO:0000269|PubMed:23281369}.		SUBUNIT: Homodimer. Homodimerizes after import into the mitochondrion. {ECO:0000250|UniProtKB:P49748}.
P51885	0.72899	26.0197	3.59286	0.00641574	0.0440583	-2.69439	reviewed	LUM_MOUSE	Lumican (Keratan sulfate proteoglycan lumican) (KSPG lumican)	Lum Lcn Ldc	338	positive regulation of transcription by RNA polymerase II [GO:0045944]; positive regulation of transforming growth factor beta1 production [GO:0032914]	collagen-containing extracellular matrix [GO:0062023]; extracellular matrix [GO:0031012]; extracellular region [GO:0005576]; fibrillar collagen trimer [GO:0005583]	collagen binding [GO:0005518]	collagen-containing extracellular matrix [GO:0062023]; extracellular matrix [GO:0031012]; extracellular region [GO:0005576]; fibrillar collagen trimer [GO:0005583]; collagen binding [GO:0005518]; positive regulation of transcription by RNA polymerase II [GO:0045944]; positive regulation of transforming growth factor beta1 production [GO:0032914]	GO:0005518; GO:0005576; GO:0005583; GO:0031012; GO:0032914; GO:0045944; GO:0062023			cellular organisms (no rank), Eukaryota (superkingdom), Opisthokonta (clade), Metazoa (kingdom), Eumetazoa (clade), Bilateria (clade), Deuterostomia (clade), Chordata (phylum), Craniata (subphylum), Vertebrata (clade), Gnathostomata (clade), Teleostomi (clade), Euteleostomi (clade), Sarcopterygii (superclass), Dipnotetrapodomorpha (clade), Tetrapoda (clade), Amniota (clade), Mammalia (class), The…	131567 (no rank), 2759 (superkingdom), 33154 (clade), 33208 (kingdom), 6072 (clade), 33213 (clade), 33511 (clade), 7711 (phylum), 89593 (subphylum), 7742 (clade), 7776 (clade), 117570 (clade), 117571 (clade), 8287 (superclass), 1338369 (clade), 32523 (clade), 32524 (clade), 40674 (class), 32525 (clade), 9347 (clade), 1437010 (clade), 314146 (superorder), 314147 (clade), 9989 (order), 1963758 (sub…	PTM: Contains keratan sulfate. {ECO:0000250|UniProtKB:Q05443}.; PTM: Cys-37, Cys-41, Cys-43 and Cys-53 are involved in disulfide bonds.		SUBUNIT: Binds to laminin. {ECO:0000250}.
P52503	-0.505411	25.3559	-3.45645	0.00788808	0.048023	-2.9082	reviewed	NDUS6_MOUSE	NADH dehydrogenase [ubiquinone] iron-sulfur protein 6, mitochondrial (Complex I-13kD-A) (CI-13kD-A) (NADH-ubiquinone oxidoreductase 13 kDa-A subunit)	Ndufs6 Ip13	116	aerobic respiration [GO:0009060]; cellular senescence [GO:0090398]; circulatory system development [GO:0072359]; DNA damage response, signal transduction by p53 class mediator [GO:0030330]; fatty acid metabolic process [GO:0006631]; gene expression [GO:0010467]; kidney development [GO:0001822]; mesenchymal stem cell differentiation [GO:0072497]; mesenchymal stem cell proliferation [GO:0097168]; m…	mitochondrial inner membrane [GO:0005743]; mitochondrion [GO:0005739]; respiratory chain complex I [GO:0045271]		mitochondrial inner membrane [GO:0005743]; mitochondrion [GO:0005739]; respiratory chain complex I [GO:0045271]; aerobic respiration [GO:0009060]; cellular senescence [GO:0090398]; circulatory system development [GO:0072359]; DNA damage response, signal transduction by p53 class mediator [GO:0030330]; fatty acid metabolic process [GO:0006631]; gene expression [GO:0010467]; kidney development [GO:…	GO:0001822; GO:0005739; GO:0005743; GO:0006120; GO:0006631; GO:0006936; GO:0007005; GO:0009060; GO:0010467; GO:0017145; GO:0022904; GO:0030330; GO:0032981; GO:0035264; GO:0042776; GO:0045271; GO:0051881; GO:0061458; GO:0072359; GO:0072497; GO:0072593; GO:0090398; GO:0097168			cellular organisms (no rank), Eukaryota (superkingdom), Opisthokonta (clade), Metazoa (kingdom), Eumetazoa (clade), Bilateria (clade), Deuterostomia (clade), Chordata (phylum), Craniata (subphylum), Vertebrata (clade), Gnathostomata (clade), Teleostomi (clade), Euteleostomi (clade), Sarcopterygii (superclass), Dipnotetrapodomorpha (clade), Tetrapoda (clade), Amniota (clade), Mammalia (class), The…	131567 (no rank), 2759 (superkingdom), 33154 (clade), 33208 (kingdom), 6072 (clade), 33213 (clade), 33511 (clade), 7711 (phylum), 89593 (subphylum), 7742 (clade), 7776 (clade), 117570 (clade), 117571 (clade), 8287 (superclass), 1338369 (clade), 32523 (clade), 32524 (clade), 40674 (class), 32525 (clade), 9347 (clade), 1437010 (clade), 314146 (superorder), 314147 (clade), 9989 (order), 1963758 (sub…			SUBUNIT: Mammalian complex I is composed of 45 different subunits. This is a component of the iron-sulfur (IP) fragment of the enzyme. {ECO:0000269|PubMed:22474353, ECO:0000269|PubMed:38575788}.
P60335	0.695567	23.3311	3.60005	0.00634662	0.0440583	-2.68316	reviewed	PCBP1_MOUSE	Poly(rC)-binding protein 1 (Alpha-CP1) (Heterogeneous nuclear ribonucleoprotein E1) (hnRNP E1)	Pcbp1	356	mRNA processing [GO:0006397]; positive regulation of transcription by RNA polymerase II [GO:0045944]; protein maturation [GO:0051604]; viral RNA genome replication [GO:0039694]	cytoplasm [GO:0005737]; cytoplasmic ribonucleoprotein granule [GO:0036464]; cytosol [GO:0005829]; nuclear speck [GO:0016607]; nucleus [GO:0005634]; postsynaptic density [GO:0014069]; ribonucleoprotein complex [GO:1990904]	DNA-binding transcription factor activity, RNA polymerase II-specific [GO:0000981]; iron chaperone activity [GO:0034986]; mRNA 3'-UTR binding [GO:0003730]; RNA binding [GO:0003723]; sequence-specific single stranded DNA binding [GO:0098847]; single-stranded DNA binding [GO:0003697]; translation activator activity [GO:0008494]	cytoplasm [GO:0005737]; cytoplasmic ribonucleoprotein granule [GO:0036464]; cytosol [GO:0005829]; nuclear speck [GO:0016607]; nucleus [GO:0005634]; postsynaptic density [GO:0014069]; ribonucleoprotein complex [GO:1990904]; DNA-binding transcription factor activity, RNA polymerase II-specific [GO:0000981]; iron chaperone activity [GO:0034986]; mRNA 3'-UTR binding [GO:0003730]; RNA binding [GO:0003…	GO:0000981; GO:0003697; GO:0003723; GO:0003730; GO:0005634; GO:0005737; GO:0005829; GO:0006397; GO:0008494; GO:0014069; GO:0016607; GO:0034986; GO:0036464; GO:0039694; GO:0045944; GO:0051604; GO:0098847; GO:1990904			cellular organisms (no rank), Eukaryota (superkingdom), Opisthokonta (clade), Metazoa (kingdom), Eumetazoa (clade), Bilateria (clade), Deuterostomia (clade), Chordata (phylum), Craniata (subphylum), Vertebrata (clade), Gnathostomata (clade), Teleostomi (clade), Euteleostomi (clade), Sarcopterygii (superclass), Dipnotetrapodomorpha (clade), Tetrapoda (clade), Amniota (clade), Mammalia (class), The…	131567 (no rank), 2759 (superkingdom), 33154 (clade), 33208 (kingdom), 6072 (clade), 33213 (clade), 33511 (clade), 7711 (phylum), 89593 (subphylum), 7742 (clade), 7776 (clade), 117570 (clade), 117571 (clade), 8287 (superclass), 1338369 (clade), 32523 (clade), 32524 (clade), 40674 (class), 32525 (clade), 9347 (clade), 1437010 (clade), 314146 (superorder), 314147 (clade), 9989 (order), 1963758 (sub…	PTM: Phosphorylated; lowers poly(rC)-binding activity. {ECO:0000250|UniProtKB:Q15365}.	Q99N13
P61979	0.69981	23.5485	4.58558	0.00154083	0.0230268	-1.20457	reviewed	HNRPK_MOUSE	Heterogeneous nuclear ribonucleoprotein K (hnRNP K)	Hnrnpk Hnrpk	463	mRNA processing [GO:0006397]; negative regulation of apoptotic process [GO:0043066]; negative regulation of DNA-templated transcription [GO:0045892]; negative regulation of mRNA splicing, via spliceosome [GO:0048025]; positive regulation of receptor-mediated endocytosis [GO:0048260]; positive regulation of transcription by RNA polymerase II [GO:0045944]; random inactivation of X chromosome [GO:00…	anchoring junction [GO:0070161]; catalytic step 2 spliceosome [GO:0071013]; cell projection [GO:0042995]; chromatin [GO:0000785]; cytoplasm [GO:0005737]; cytoplasmic stress granule [GO:0010494]; nucleoplasm [GO:0005654]; nucleus [GO:0005634]; podosome [GO:0002102]; ribonucleoprotein complex [GO:1990904]	DNA binding [GO:0003677]; identical protein binding [GO:0042802]; protein domain specific binding [GO:0019904]; RNA binding [GO:0003723]	anchoring junction [GO:0070161]; catalytic step 2 spliceosome [GO:0071013]; cell projection [GO:0042995]; chromatin [GO:0000785]; cytoplasm [GO:0005737]; cytoplasmic stress granule [GO:0010494]; nucleoplasm [GO:0005654]; nucleus [GO:0005634]; podosome [GO:0002102]; ribonucleoprotein complex [GO:1990904]; DNA binding [GO:0003677]; identical protein binding [GO:0042802]; protein domain specific bin…	GO:0000785; GO:0002102; GO:0003677; GO:0003723; GO:0005634; GO:0005654; GO:0005737; GO:0006397; GO:0008380; GO:0010494; GO:0010988; GO:0019904; GO:0031048; GO:0042802; GO:0042995; GO:0043066; GO:0045892; GO:0045944; GO:0048025; GO:0048260; GO:0060816; GO:0070161; GO:0071013; GO:1902165; GO:1990904			cellular organisms (no rank), Eukaryota (superkingdom), Opisthokonta (clade), Metazoa (kingdom), Eumetazoa (clade), Bilateria (clade), Deuterostomia (clade), Chordata (phylum), Craniata (subphylum), Vertebrata (clade), Gnathostomata (clade), Teleostomi (clade), Euteleostomi (clade), Sarcopterygii (superclass), Dipnotetrapodomorpha (clade), Tetrapoda (clade), Amniota (clade), Mammalia (class), The…	131567 (no rank), 2759 (superkingdom), 33154 (clade), 33208 (kingdom), 6072 (clade), 33213 (clade), 33511 (clade), 7711 (phylum), 89593 (subphylum), 7742 (clade), 7776 (clade), 117570 (clade), 117571 (clade), 8287 (superclass), 1338369 (clade), 32523 (clade), 32524 (clade), 40674 (class), 32525 (clade), 9347 (clade), 1437010 (clade), 314146 (superorder), 314147 (clade), 9989 (order), 1963758 (sub…	PTM: Sumoylated by CBX4. Sumoylation is increased upon DNA damage, such as that produced by doxorubicin, etoposide, UV light and camptothecin, due to enhanced CBX4 phosphorylation by HIPK2 under these conditions (By similarity). {ECO:0000250}.; PTM: Ubiquitinated by MDM2. Doxorubicin treatment does not affect monoubiquitination, but slightly decreases HNRNPK poly-ubiquitination (By similarity). {…		SUBUNIT: Identified in the spliceosome C complex (By similarity). Part of a transcription inhibitory ribonucleoprotein complex composed at least of the circular RNA circZNF827, ZNF827 and HNRNPL (By similarity). Interacts with ANKRD28 and RBM42 (By similarity). Interacts with DDX1 (By similarity). Interacts with MDM2; this interaction leads to ubiquitination and proteasomal degradation (By simila…
P62192	0.94075	22.5617	5.43886	0.000506709	0.0116833	-0.0350072	reviewed	PRS4_MOUSE	26S proteasome regulatory subunit 4 (P26s4) (26S proteasome AAA-ATPase subunit RPT2) (Proteasome 26S subunit ATPase 1)	Psmc1	440		cytosol [GO:0005829]; membrane [GO:0016020]; nucleoplasm [GO:0005654]; proteasome accessory complex [GO:0022624]; proteasome regulatory particle [GO:0005838]	ATP binding [GO:0005524]; ATP hydrolysis activity [GO:0016887]	cytosol [GO:0005829]; membrane [GO:0016020]; nucleoplasm [GO:0005654]; proteasome accessory complex [GO:0022624]; proteasome regulatory particle [GO:0005838]; ATP binding [GO:0005524]; ATP hydrolysis activity [GO:0016887]	GO:0005524; GO:0005654; GO:0005829; GO:0005838; GO:0016020; GO:0016887; GO:0022624		BINDING 226..233; /ligand=ATP; /ligand_id=ChEBI:CHEBI:30616; /evidence=ECO:0000255	cellular organisms (no rank), Eukaryota (superkingdom), Opisthokonta (clade), Metazoa (kingdom), Eumetazoa (clade), Bilateria (clade), Deuterostomia (clade), Chordata (phylum), Craniata (subphylum), Vertebrata (clade), Gnathostomata (clade), Teleostomi (clade), Euteleostomi (clade), Sarcopterygii (superclass), Dipnotetrapodomorpha (clade), Tetrapoda (clade), Amniota (clade), Mammalia (class), The…	131567 (no rank), 2759 (superkingdom), 33154 (clade), 33208 (kingdom), 6072 (clade), 33213 (clade), 33511 (clade), 7711 (phylum), 89593 (subphylum), 7742 (clade), 7776 (clade), 117570 (clade), 117571 (clade), 8287 (superclass), 1338369 (clade), 32523 (clade), 32524 (clade), 40674 (class), 32525 (clade), 9347 (clade), 1437010 (clade), 314146 (superorder), 314147 (clade), 9989 (order), 1963758 (sub…			SUBUNIT: Component of the 19S proteasome regulatory particle complex. The 26S proteasome consists of a 20S core particle (CP) and two 19S regulatory subunits (RP). The regulatory particle is made of a lid composed of 9 subunits, a base containing 6 ATPases including PSMC1 and few additional components. Interacts with SCA7. Interacts with NGLY1. Interacts with PAAF1. {ECO:0000250|UniProtKB:P62191,…
P62334	1.16238	22.1569	5.76983	0.000338338	0.00929486	0.38991	reviewed	PRS10_MOUSE	26S proteasome regulatory subunit 10B (26S proteasome AAA-ATPase subunit RPT4) (Proteasome 26S subunit ATPase 6) (Proteasome subunit p42)	Psmc6 Sug2	389	positive regulation of inclusion body assembly [GO:0090261]	cytosolic proteasome complex [GO:0031597]; inclusion body [GO:0016234]; nucleus [GO:0005634]; proteasome accessory complex [GO:0022624]	ATP binding [GO:0005524]; ATP hydrolysis activity [GO:0016887]; identical protein binding [GO:0042802]	cytosolic proteasome complex [GO:0031597]; inclusion body [GO:0016234]; nucleus [GO:0005634]; proteasome accessory complex [GO:0022624]; ATP binding [GO:0005524]; ATP hydrolysis activity [GO:0016887]; identical protein binding [GO:0042802]; positive regulation of inclusion body assembly [GO:0090261]	GO:0005524; GO:0005634; GO:0016234; GO:0016887; GO:0022624; GO:0031597; GO:0042802; GO:0090261		BINDING 174..181; /ligand=ATP; /ligand_id=ChEBI:CHEBI:30616; /evidence=ECO:0000255	cellular organisms (no rank), Eukaryota (superkingdom), Opisthokonta (clade), Metazoa (kingdom), Eumetazoa (clade), Bilateria (clade), Deuterostomia (clade), Chordata (phylum), Craniata (subphylum), Vertebrata (clade), Gnathostomata (clade), Teleostomi (clade), Euteleostomi (clade), Sarcopterygii (superclass), Dipnotetrapodomorpha (clade), Tetrapoda (clade), Amniota (clade), Mammalia (class), The…	131567 (no rank), 2759 (superkingdom), 33154 (clade), 33208 (kingdom), 6072 (clade), 33213 (clade), 33511 (clade), 7711 (phylum), 89593 (subphylum), 7742 (clade), 7776 (clade), 117570 (clade), 117571 (clade), 8287 (superclass), 1338369 (clade), 32523 (clade), 32524 (clade), 40674 (class), 32525 (clade), 9347 (clade), 1437010 (clade), 314146 (superorder), 314147 (clade), 9989 (order), 1963758 (sub…			SUBUNIT: Component of the 19S proteasome regulatory particle complex. The 26S proteasome consists of a 20S core particle (CP) and two 19S regulatory subunits (RP). The regulatory particle is made of a lid composed of 9 subunits, a base containing 6 ATPases including PSMC6 and few additional components. Interacts with PAAF1. {ECO:0000250|UniProtKB:P62333, ECO:0000269|PubMed:16857966}.
P62806	0.678813	29.3	4.01853	0.00342099	0.0342254	-2.04001	reviewed	H4_MOUSE	Histone H4	H4c1 Hist1h4a; H4c2 H4-53 Hist1h4b; H4c3 H4-12 Hist1h4c; H4c4 Hist1h4d; H4c6 Hist1h4f; H4c8 Hist1h4h; H4c9 Hist1h4i; H4c11 Hist1h4j; H4c12 Hist1h4k; Hist1h4m; H4c14 Hist2h4 Hist2h4a; H4c16 H4f16 Hist4h4	103	chromatin organization [GO:0006325]; negative regulation of megakaryocyte differentiation [GO:0045653]; nucleosome assembly [GO:0006334]; protein localization to CENP-A containing chromatin [GO:0061644]	CENP-A containing nucleosome [GO:0043505]; nucleoplasm [GO:0005654]; nucleosome [GO:0000786]; nucleus [GO:0005634]	DNA binding [GO:0003677]; protein heterodimerization activity [GO:0046982]; structural constituent of chromatin [GO:0030527]	CENP-A containing nucleosome [GO:0043505]; nucleoplasm [GO:0005654]; nucleosome [GO:0000786]; nucleus [GO:0005634]; DNA binding [GO:0003677]; protein heterodimerization activity [GO:0046982]; structural constituent of chromatin [GO:0030527]; chromatin organization [GO:0006325]; negative regulation of megakaryocyte differentiation [GO:0045653]; nucleosome assembly [GO:0006334]; protein localizatio…	GO:0000786; GO:0003677; GO:0005634; GO:0005654; GO:0006325; GO:0006334; GO:0030527; GO:0043505; GO:0045653; GO:0046982; GO:0061644			cellular organisms (no rank), Eukaryota (superkingdom), Opisthokonta (clade), Metazoa (kingdom), Eumetazoa (clade), Bilateria (clade), Deuterostomia (clade), Chordata (phylum), Craniata (subphylum), Vertebrata (clade), Gnathostomata (clade), Teleostomi (clade), Euteleostomi (clade), Sarcopterygii (superclass), Dipnotetrapodomorpha (clade), Tetrapoda (clade), Amniota (clade), Mammalia (class), The…	131567 (no rank), 2759 (superkingdom), 33154 (clade), 33208 (kingdom), 6072 (clade), 33213 (clade), 33511 (clade), 7711 (phylum), 89593 (subphylum), 7742 (clade), 7776 (clade), 117570 (clade), 117571 (clade), 8287 (superclass), 1338369 (clade), 32523 (clade), 32524 (clade), 40674 (class), 32525 (clade), 9347 (clade), 1437010 (clade), 314146 (superorder), 314147 (clade), 9989 (order), 1963758 (sub…	PTM: Acetylation at Lys-6 (H4K5ac), Lys-9 (H4K8ac), Lys-13 (H4K12ac) and Lys-17 (H4K16ac) occurs in coding regions of the genome but not in heterochromatin. Acetylated as part of spermatogenesis progression prior to histone-to-protamine exchange (PubMed:32726616). {ECO:0000250|UniProtKB:P62805, ECO:0000269|PubMed:32726616}.; PTM: Citrullination at Arg-4 (H4R3ci) by PADI4 impairs methylation. {ECO…	Q8CDM1; Q9EQQ9	SUBUNIT: The nucleosome is a histone octamer containing two molecules each of H2A, H2B, H3 and H4 assembled in one H3-H4 heterotetramer and two H2A-H2B heterodimers. The octamer wraps approximately 147 bp of DNA. Found in a co-chaperone complex with DNJC9, MCM2 and histone H3.3-H4 dimers (By similarity). Within the complex, interacts with DNJC9 (via C-terminus); the interaction is direct (By simi…
P62900	0.522017	23.1301	4.00601	0.00348356	0.0342833	-2.05894	reviewed	RL31_MOUSE	Large ribosomal subunit protein eL31 (60S ribosomal protein L31)	Rpl31	125	cytoplasmic translation [GO:0002181]	cytoplasm [GO:0005737]; cytosol [GO:0005829]; cytosolic large ribosomal subunit [GO:0022625]; postsynapse [GO:0098794]; ribosome [GO:0005840]; synapse [GO:0045202]	structural constituent of ribosome [GO:0003735]	cytoplasm [GO:0005737]; cytosol [GO:0005829]; cytosolic large ribosomal subunit [GO:0022625]; postsynapse [GO:0098794]; ribosome [GO:0005840]; synapse [GO:0045202]; structural constituent of ribosome [GO:0003735]; cytoplasmic translation [GO:0002181]	GO:0002181; GO:0003735; GO:0005737; GO:0005829; GO:0005840; GO:0022625; GO:0045202; GO:0098794			cellular organisms (no rank), Eukaryota (superkingdom), Opisthokonta (clade), Metazoa (kingdom), Eumetazoa (clade), Bilateria (clade), Deuterostomia (clade), Chordata (phylum), Craniata (subphylum), Vertebrata (clade), Gnathostomata (clade), Teleostomi (clade), Euteleostomi (clade), Sarcopterygii (superclass), Dipnotetrapodomorpha (clade), Tetrapoda (clade), Amniota (clade), Mammalia (class), The…	131567 (no rank), 2759 (superkingdom), 33154 (clade), 33208 (kingdom), 6072 (clade), 33213 (clade), 33511 (clade), 7711 (phylum), 89593 (subphylum), 7742 (clade), 7776 (clade), 117570 (clade), 117571 (clade), 8287 (superclass), 1338369 (clade), 32523 (clade), 32524 (clade), 40674 (class), 32525 (clade), 9347 (clade), 1437010 (clade), 314146 (superorder), 314147 (clade), 9989 (order), 1963758 (sub…			SUBUNIT: Component of the large ribosomal subunit. {ECO:0000269|PubMed:36517592}.
P62962	0.947981	23.3538	4.15302	0.0028194	0.0316008	-1.83788	reviewed	PROF1_MOUSE	Profilin-1 (Profilin I)	Pfn1	140	actin cytoskeleton organization [GO:0030036]; modification of postsynaptic actin cytoskeleton [GO:0098885]; modulation of chemical synaptic transmission [GO:0050804]; negative regulation of actin filament polymerization [GO:0030837]; negative regulation of stress fiber assembly [GO:0051497]; neural tube closure [GO:0001843]; positive regulation of actin filament polymerization [GO:0030838]; posit…	cell cortex [GO:0005938]; cytoplasm [GO:0005737]; cytoskeleton [GO:0005856]; cytosol [GO:0005829]; extracellular region [GO:0005576]; glutamatergic synapse [GO:0098978]; nucleus [GO:0005634]	actin monomer binding [GO:0003785]; adenyl-nucleotide exchange factor activity [GO:0000774]; phosphatidylinositol-4,5-bisphosphate binding [GO:0005546]; phosphotyrosine residue binding [GO:0001784]; proline-rich region binding [GO:0070064]; small GTPase binding [GO:0031267]	cell cortex [GO:0005938]; cytoplasm [GO:0005737]; cytoskeleton [GO:0005856]; cytosol [GO:0005829]; extracellular region [GO:0005576]; glutamatergic synapse [GO:0098978]; nucleus [GO:0005634]; actin monomer binding [GO:0003785]; adenyl-nucleotide exchange factor activity [GO:0000774]; phosphatidylinositol-4,5-bisphosphate binding [GO:0005546]; phosphotyrosine residue binding [GO:0001784]; proline-…	GO:0000774; GO:0001784; GO:0001843; GO:0003785; GO:0005546; GO:0005576; GO:0005634; GO:0005737; GO:0005829; GO:0005856; GO:0005938; GO:0006357; GO:0008064; GO:0010634; GO:0030036; GO:0030837; GO:0030838; GO:0031267; GO:0050804; GO:0050821; GO:0051497; GO:0060074; GO:0070064; GO:0098885; GO:0098978; GO:1900029			cellular organisms (no rank), Eukaryota (superkingdom), Opisthokonta (clade), Metazoa (kingdom), Eumetazoa (clade), Bilateria (clade), Deuterostomia (clade), Chordata (phylum), Craniata (subphylum), Vertebrata (clade), Gnathostomata (clade), Teleostomi (clade), Euteleostomi (clade), Sarcopterygii (superclass), Dipnotetrapodomorpha (clade), Tetrapoda (clade), Amniota (clade), Mammalia (class), The…	131567 (no rank), 2759 (superkingdom), 33154 (clade), 33208 (kingdom), 6072 (clade), 33213 (clade), 33511 (clade), 7711 (phylum), 89593 (subphylum), 7742 (clade), 7776 (clade), 117570 (clade), 117571 (clade), 8287 (superclass), 1338369 (clade), 32523 (clade), 32524 (clade), 40674 (class), 32525 (clade), 9347 (clade), 1437010 (clade), 314146 (superorder), 314147 (clade), 9989 (order), 1963758 (sub…	PTM: Phosphorylation at Ser-138 reduces its affinity for G-actin and blocks its interaction with HTT, reducing its ability to inhibit androgen receptor (AR) and HTT aggregation. {ECO:0000250|UniProtKB:P07737}.	P03372	SUBUNIT: Found in a complex with XPO6, Ran, ACTB and PFN1 (By similarity). Interacts with ACTB (By similarity). Interacts with VASP (By similarity). Interacts with HTT (By similarity). Interacts with SH3BGRL (By similarity). Occurs in many kinds of cells as a complex with monomeric actin in a 1:1 ratio (By similarity). Interacts with ACTMAP (By similarity). {ECO:0000250|UniProtKB:P07737}.
P63017	0.506683	28.8901	3.93233	0.0038777	0.036481	-2.17079	reviewed	HSP7C_MOUSE	Heat shock cognate 71 kDa protein (EC 3.6.4.10) (Heat shock 70 kDa protein 8)	Hspa8 Hsc70 Hsc73	646	cellular response to cadmium ion [GO:0071276]; cellular response to heat [GO:0034605]; cellular response to hydrogen peroxide [GO:0070301]; cerebellum development [GO:0021549]; chaperone cofactor-dependent protein refolding [GO:0051085]; chaperone-mediated autophagy [GO:0061684]; chaperone-mediated autophagy translocation complex disassembly [GO:1904764]; chaperone-mediated protein folding [GO:00…	autophagosome [GO:0005776]; cell surface [GO:0009986]; cytoplasm [GO:0005737]; cytosol [GO:0005829]; dendritic shaft [GO:0043198]; dendritic spine [GO:0043197]; extracellular exosome [GO:0070062]; glutamatergic synapse [GO:0098978]; glycinergic synapse [GO:0098690]; intermediate filament [GO:0005882]; late endosome [GO:0005770]; late endosome lumen [GO:0031906]; lysosomal matrix [GO:1990836]; lys…	A1 adenosine receptor binding [GO:0031686]; ADP binding [GO:0043531]; ATP binding [GO:0005524]; ATP hydrolysis activity [GO:0016887]; ATP-dependent protein folding chaperone [GO:0140662]; clathrin-uncoating ATPase activity [GO:1990833]; enzyme binding [GO:0019899]; peptide binding [GO:0042277]; phosphatidylserine binding [GO:0001786]; prostaglandin binding [GO:1904593]; protein-macromolecule adap…	autophagosome [GO:0005776]; cell surface [GO:0009986]; cytoplasm [GO:0005737]; cytosol [GO:0005829]; dendritic shaft [GO:0043198]; dendritic spine [GO:0043197]; extracellular exosome [GO:0070062]; glutamatergic synapse [GO:0098978]; glycinergic synapse [GO:0098690]; intermediate filament [GO:0005882]; late endosome [GO:0005770]; late endosome lumen [GO:0031906]; lysosomal matrix [GO:1990836]; lys…	GO:0000082; GO:0000398; GO:0000974; GO:0001786; GO:0001822; GO:0001916; GO:0001917; GO:0003723; GO:0005524; GO:0005634; GO:0005681; GO:0005730; GO:0005737; GO:0005765; GO:0005770; GO:0005776; GO:0005829; GO:0005874; GO:0005882; GO:0006457; GO:0006606; GO:0007519; GO:0008021; GO:0009410; GO:0009986; GO:0010045; GO:0010667; GO:0014069; GO:0014823; GO:0016887; GO:0019899; GO:0021549; GO:0030674; GO:…		BINDING 12..15; /ligand=ATP; /ligand_id=ChEBI:CHEBI:30616; /evidence=ECO:0000250; BINDING 14; /ligand=ADP; /ligand_id=ChEBI:CHEBI:456216; /evidence=ECO:0000250|UniProtKB:P19120; BINDING 15; /ligand=ADP; /ligand_id=ChEBI:CHEBI:456216; /evidence=ECO:0000250|UniProtKB:P19120; BINDING 71; /ligand=ATP; /ligand_id=ChEBI:CHEBI:30616; /evidence=ECO:0000250; BINDING 202..204; /ligand=ATP; /ligand_id=ChEBI…	cellular organisms (no rank), Eukaryota (superkingdom), Opisthokonta (clade), Metazoa (kingdom), Eumetazoa (clade), Bilateria (clade), Deuterostomia (clade), Chordata (phylum), Craniata (subphylum), Vertebrata (clade), Gnathostomata (clade), Teleostomi (clade), Euteleostomi (clade), Sarcopterygii (superclass), Dipnotetrapodomorpha (clade), Tetrapoda (clade), Amniota (clade), Mammalia (class), The…	131567 (no rank), 2759 (superkingdom), 33154 (clade), 33208 (kingdom), 6072 (clade), 33213 (clade), 33511 (clade), 7711 (phylum), 89593 (subphylum), 7742 (clade), 7776 (clade), 117570 (clade), 117571 (clade), 8287 (superclass), 1338369 (clade), 32523 (clade), 32524 (clade), 40674 (class), 32525 (clade), 9347 (clade), 1437010 (clade), 314146 (superorder), 314147 (clade), 9989 (order), 1963758 (sub…	PTM: Acetylated. {ECO:0000250|UniProtKB:P11142}.; PTM: ISGylated. {ECO:0000269|PubMed:16139798}.; PTM: Trimethylation at Lys-561 reduces fibrillar SNCA binding. {ECO:0000250|UniProtKB:P11142}.	O88447; P43883; Q9DBG5; O41974	SUBUNIT: Identified in a IGF2BP1-dependent mRNP granule complex containing untranslated mRNAs (By similarity). Interacts with PACRG (By similarity). Interacts with DNAJC7 (By similarity). Interacts with DNAJB12 (via J domain) (By similarity). Interacts with DNAJB14 (via J domain) (By similarity). Interacts (via C-terminus) with the E3 ligase STUB1 forming a 210 kDa complex of one STUB1 and two HS…
P63030	-0.764268	22.0315	-5.30212	0.000601352	0.0134803	-0.215206	reviewed	MPC1_MOUSE	Mitochondrial pyruvate carrier 1 (Brain protein 44-like protein)	Mpc1 Brp44l	109	acetyl-CoA biosynthetic process from pyruvate [GO:0006086]; cellular response to leukemia inhibitory factor [GO:1990830]; mitochondrial pyruvate transmembrane transport [GO:0006850]	mitochondrial inner membrane [GO:0005743]; mitochondrion [GO:0005739]	pyruvate transmembrane transporter activity [GO:0050833]	mitochondrial inner membrane [GO:0005743]; mitochondrion [GO:0005739]; pyruvate transmembrane transporter activity [GO:0050833]; acetyl-CoA biosynthetic process from pyruvate [GO:0006086]; cellular response to leukemia inhibitory factor [GO:1990830]; mitochondrial pyruvate transmembrane transport [GO:0006850]	GO:0005739; GO:0005743; GO:0006086; GO:0006850; GO:0050833; GO:1990830			cellular organisms (no rank), Eukaryota (superkingdom), Opisthokonta (clade), Metazoa (kingdom), Eumetazoa (clade), Bilateria (clade), Deuterostomia (clade), Chordata (phylum), Craniata (subphylum), Vertebrata (clade), Gnathostomata (clade), Teleostomi (clade), Euteleostomi (clade), Sarcopterygii (superclass), Dipnotetrapodomorpha (clade), Tetrapoda (clade), Amniota (clade), Mammalia (class), The…	131567 (no rank), 2759 (superkingdom), 33154 (clade), 33208 (kingdom), 6072 (clade), 33213 (clade), 33511 (clade), 7711 (phylum), 89593 (subphylum), 7742 (clade), 7776 (clade), 117570 (clade), 117571 (clade), 8287 (superclass), 1338369 (clade), 32523 (clade), 32524 (clade), 40674 (class), 32525 (clade), 9347 (clade), 1437010 (clade), 314146 (superorder), 314147 (clade), 9989 (order), 1963758 (sub…			SUBUNIT: Homodimer. Forms heterodimer with MPC2. The heterodimer is the more stable and dominant form. {ECO:0000250|UniProtKB:Q9Y5U8}.
P63158	1.00395	25.2229	4.55766	0.00160078	0.0234106	-1.24465	reviewed	HMGB1_MOUSE	High mobility group protein B1 (High mobility group protein 1) (HMG-1)	Hmgb1 Hmg-1 Hmg1	215	adaptive immune response [GO:0002250]; apoptotic cell clearance [GO:0043277]; autophagy [GO:0006914]; base-excision repair [GO:0006284]; cellular response to interleukin-7 [GO:0098761]; cellular response to lipopolysaccharide [GO:0071222]; chromatin organization [GO:0006325]; DNA geometric change [GO:0032392]; DNA recombination [GO:0006310]; double-strand break repair [GO:0006302]; endothelial ce…	chromosome [GO:0005694]; cytoplasm [GO:0005737]; early endosome [GO:0005769]; endoplasmic reticulum-Golgi intermediate compartment [GO:0005793]; extracellular region [GO:0005576]; extracellular space [GO:0005615]; neuron projection [GO:0043005]; nucleus [GO:0005634]; plasma membrane [GO:0005886]	bent DNA binding [GO:0003681]; bubble DNA binding [GO:0000405]; calcium-dependent protein kinase regulator activity [GO:0010858]; crossed form four-way junction DNA binding [GO:0000402]; cytokine activity [GO:0005125]; DNA binding, bending [GO:0008301]; double-stranded DNA binding [GO:0003690]; double-stranded RNA binding [GO:0003725]; four-way junction DNA binding [GO:0000400]; heparin binding […	chromosome [GO:0005694]; cytoplasm [GO:0005737]; early endosome [GO:0005769]; endoplasmic reticulum-Golgi intermediate compartment [GO:0005793]; extracellular region [GO:0005576]; extracellular space [GO:0005615]; neuron projection [GO:0043005]; nucleus [GO:0005634]; plasma membrane [GO:0005886]; bent DNA binding [GO:0003681]; bubble DNA binding [GO:0000405]; calcium-dependent protein kinase regu…	GO:0000400; GO:0000401; GO:0000402; GO:0000405; GO:0001654; GO:0001773; GO:0001786; GO:0001935; GO:0002053; GO:0002250; GO:0002270; GO:0002281; GO:0002318; GO:0002643; GO:0002840; GO:0003676; GO:0003681; GO:0003690; GO:0003725; GO:0003727; GO:0005125; GO:0005576; GO:0005615; GO:0005634; GO:0005694; GO:0005737; GO:0005769; GO:0005793; GO:0005886; GO:0005980; GO:0006284; GO:0006302; GO:0006310; GO:…		BINDING 1..10; /ligand=heparin; /ligand_id=ChEBI:CHEBI:28304; /evidence=ECO:0000250|UniProtKB:P10103	cellular organisms (no rank), Eukaryota (superkingdom), Opisthokonta (clade), Metazoa (kingdom), Eumetazoa (clade), Bilateria (clade), Deuterostomia (clade), Chordata (phylum), Craniata (subphylum), Vertebrata (clade), Gnathostomata (clade), Teleostomi (clade), Euteleostomi (clade), Sarcopterygii (superclass), Dipnotetrapodomorpha (clade), Tetrapoda (clade), Amniota (clade), Mammalia (class), The…	131567 (no rank), 2759 (superkingdom), 33154 (clade), 33208 (kingdom), 6072 (clade), 33213 (clade), 33511 (clade), 7711 (phylum), 89593 (subphylum), 7742 (clade), 7776 (clade), 117570 (clade), 117571 (clade), 8287 (superclass), 1338369 (clade), 32523 (clade), 32524 (clade), 40674 (class), 32525 (clade), 9347 (clade), 1437010 (clade), 314146 (superorder), 314147 (clade), 9989 (order), 1963758 (sub…	PTM: Acetylated on multiple sites upon stimulation with LPS (By similarity). Acetylation on lysine residues in the nuclear localization signals (NLS 1 and NLS 2) leads to cytoplasmic localization and subsequent secretion. Acetylation on Lys-3 results in preferential binding to DNA ends and impairs DNA bending activity (By similarity). {ECO:0000250|UniProtKB:P10103, ECO:0000250|UniProtKB:P63159}.;…	O88597; Q8VIM0; Q01860	SUBUNIT: Interacts (fully reduced HMGB1) with CXCL12; probably in a 1:2 ratio involving two molecules of CXCL12, each interacting with one HMG box of HMGB1; inhibited by glycyrrhizin (PubMed:22370717). Associates with the TLR4:LY96 receptor complex (By similarity). Component of the RAG complex composed of core components RAG1 and RAG2, and associated component HMGB1 or HMGB2 (PubMed:9184213). Int…
P68369	0.973299	24.0932	3.54789	0.00686614	0.0440583	-2.76468	reviewed	TBA1A_MOUSE	Tubulin alpha-1A chain (EC 3.6.5.-) (Alpha-tubulin 1) (Alpha-tubulin isotype M-alpha-1) (Tubulin alpha-1 chain) [Cleaved into: Detyrosinated tubulin alpha-1A chain]	Tuba1a Tuba1	451	adult behavior [GO:0030534]; adult locomotory behavior [GO:0008344]; cellular response to calcium ion [GO:0071277]; centrosome cycle [GO:0007098]; cerebellar cortex morphogenesis [GO:0021696]; cerebral cortex development [GO:0021987]; dentate gyrus development [GO:0021542]; flagellated sperm motility [GO:0030317]; forebrain morphogenesis [GO:0048853]; gene expression [GO:0010467]; glial cell diff…	axonemal microtubule [GO:0005879]; condensed chromosome [GO:0000793]; cytoplasmic microtubule [GO:0005881]; cytoplasmic ribonucleoprotein granule [GO:0036464]; cytosol [GO:0005829]; myelin sheath [GO:0043209]; neuromuscular junction [GO:0031594]; plasma membrane [GO:0005886]; recycling endosome [GO:0055037]; sperm flagellum [GO:0036126]; synapse [GO:0045202]	GTP binding [GO:0005525]; hydrolase activity [GO:0016787]; identical protein binding [GO:0042802]; metal ion binding [GO:0046872]; protein heterodimerization activity [GO:0046982]; protein-containing complex binding [GO:0044877]; structural constituent of cytoskeleton [GO:0005200]	axonemal microtubule [GO:0005879]; condensed chromosome [GO:0000793]; cytoplasmic microtubule [GO:0005881]; cytoplasmic ribonucleoprotein granule [GO:0036464]; cytosol [GO:0005829]; myelin sheath [GO:0043209]; neuromuscular junction [GO:0031594]; plasma membrane [GO:0005886]; recycling endosome [GO:0055037]; sperm flagellum [GO:0036126]; synapse [GO:0045202]; GTP binding [GO:0005525]; hydrolase a…	GO:0000226; GO:0000793; GO:0001764; GO:0001964; GO:0005200; GO:0005525; GO:0005829; GO:0005879; GO:0005881; GO:0005886; GO:0006886; GO:0007098; GO:0007224; GO:0007613; GO:0007626; GO:0008344; GO:0008542; GO:0009612; GO:0010001; GO:0010467; GO:0016787; GO:0021542; GO:0021696; GO:0021766; GO:0021859; GO:0021987; GO:0022008; GO:0030182; GO:0030317; GO:0030534; GO:0031594; GO:0034612; GO:0035641; GO:…	ACT_SITE 254; /evidence=ECO:0000250|UniProtKB:P68363	BINDING 11; /ligand=GTP; /ligand_id=ChEBI:CHEBI:37565; /evidence=ECO:0000250|UniProtKB:P68363; BINDING 71; /ligand=GTP; /ligand_id=ChEBI:CHEBI:37565; /evidence=ECO:0000250|UniProtKB:P68363; BINDING 71; /ligand=Mg(2+); /ligand_id=ChEBI:CHEBI:18420; /evidence=ECO:0000250|UniProtKB:P68363; BINDING 140; /ligand=GTP; /ligand_id=ChEBI:CHEBI:37565; /evidence=ECO:0000250|UniProtKB:P68363; BINDING 144; /l…	cellular organisms (no rank), Eukaryota (superkingdom), Opisthokonta (clade), Metazoa (kingdom), Eumetazoa (clade), Bilateria (clade), Deuterostomia (clade), Chordata (phylum), Craniata (subphylum), Vertebrata (clade), Gnathostomata (clade), Teleostomi (clade), Euteleostomi (clade), Sarcopterygii (superclass), Dipnotetrapodomorpha (clade), Tetrapoda (clade), Amniota (clade), Mammalia (class), The…	131567 (no rank), 2759 (superkingdom), 33154 (clade), 33208 (kingdom), 6072 (clade), 33213 (clade), 33511 (clade), 7711 (phylum), 89593 (subphylum), 7742 (clade), 7776 (clade), 117570 (clade), 117571 (clade), 8287 (superclass), 1338369 (clade), 32523 (clade), 32524 (clade), 40674 (class), 32525 (clade), 9347 (clade), 1437010 (clade), 314146 (superorder), 314147 (clade), 9989 (order), 1963758 (sub…	PTM: Some glutamate residues at the C-terminus are polyglycylated, resulting in polyglycine chains on the gamma-carboxyl group. Glycylation is mainly limited to tubulin incorporated into axonemes (cilia and flagella) whereas glutamylation is prevalent in neuronal cells, centrioles, axonemes, and the mitotic spindle. Both modifications can coexist on the same protein on adjacent residues, and lowe…	Q80TQ2	SUBUNIT: Dimer of alpha and beta chains. A typical microtubule is a hollow water-filled tube with an outer diameter of 25 nm and an inner diameter of 15 nM. Alpha-beta heterodimers associate head-to-tail to form protofilaments running lengthwise along the microtubule wall with the beta-tubulin subunit facing the microtubule plus end conferring a structural polarity. Microtubules usually have 13 p…
P68372	0.595782	24.5007	3.72357	0.00527526	0.0421498	-2.49124	reviewed	TBB4B_MOUSE	Tubulin beta-4B chain (Tubulin beta-2C chain)	Tubb4b Tubb2c	445	flagellated sperm motility [GO:0030317]; microtubule-based process [GO:0007017]	axonemal microtubule [GO:0005879]; intercellular bridge [GO:0045171]; mitotic spindle [GO:0072686]; myelin sheath [GO:0043209]; sperm flagellum [GO:0036126]; tubulin complex [GO:0045298]	double-stranded RNA binding [GO:0003725]; GTP binding [GO:0005525]; GTPase activity [GO:0003924]; metal ion binding [GO:0046872]; structural constituent of cytoskeleton [GO:0005200]	axonemal microtubule [GO:0005879]; intercellular bridge [GO:0045171]; mitotic spindle [GO:0072686]; myelin sheath [GO:0043209]; sperm flagellum [GO:0036126]; tubulin complex [GO:0045298]; double-stranded RNA binding [GO:0003725]; GTP binding [GO:0005525]; GTPase activity [GO:0003924]; metal ion binding [GO:0046872]; structural constituent of cytoskeleton [GO:0005200]; flagellated sperm motility […	GO:0003725; GO:0003924; GO:0005200; GO:0005525; GO:0005879; GO:0007017; GO:0030317; GO:0036126; GO:0043209; GO:0045171; GO:0045298; GO:0046872; GO:0072686		BINDING 11; /ligand=GTP; /ligand_id=ChEBI:CHEBI:37565; /evidence=ECO:0000250|UniProtKB:Q13509; BINDING 69; /ligand=GTP; /ligand_id=ChEBI:CHEBI:37565; /evidence=ECO:0000250|UniProtKB:P68363; BINDING 69; /ligand=Mg(2+); /ligand_id=ChEBI:CHEBI:18420; /evidence=ECO:0000250|UniProtKB:P68363; BINDING 138; /ligand=GTP; /ligand_id=ChEBI:CHEBI:37565; /evidence=ECO:0000250|UniProtKB:Q13509; BINDING 142; /l…	cellular organisms (no rank), Eukaryota (superkingdom), Opisthokonta (clade), Metazoa (kingdom), Eumetazoa (clade), Bilateria (clade), Deuterostomia (clade), Chordata (phylum), Craniata (subphylum), Vertebrata (clade), Gnathostomata (clade), Teleostomi (clade), Euteleostomi (clade), Sarcopterygii (superclass), Dipnotetrapodomorpha (clade), Tetrapoda (clade), Amniota (clade), Mammalia (class), The…	131567 (no rank), 2759 (superkingdom), 33154 (clade), 33208 (kingdom), 6072 (clade), 33213 (clade), 33511 (clade), 7711 (phylum), 89593 (subphylum), 7742 (clade), 7776 (clade), 117570 (clade), 117571 (clade), 8287 (superclass), 1338369 (clade), 32523 (clade), 32524 (clade), 40674 (class), 32525 (clade), 9347 (clade), 1437010 (clade), 314146 (superorder), 314147 (clade), 9989 (order), 1963758 (sub…	PTM: Some glutamate residues at the C-terminus are polyglycylated, resulting in polyglycine chains on the gamma-carboxyl group. Glycylation is mainly limited to tubulin incorporated into axonemes (cilia and flagella) whereas glutamylation is prevalent in neuronal cells, centrioles, axonemes, and the mitotic spindle. Both modifications can coexist on the same protein on adjacent residues, and lowe…		SUBUNIT: Dimer of alpha and beta chains. A typical microtubule is a hollow water-filled tube with an outer diameter of 25 nm and an inner diameter of 15 nM. Alpha-beta heterodimers associate head-to-tail to form protofilaments running lengthwise along the microtubule wall with the beta-tubulin subunit facing the microtubule plus end conferring a structural polarity. Microtubules usually have 13 p…
P70404	-0.683652	26.3337	-3.62457	0.00611698	0.0439451	-2.64494	reviewed	IDHG1_MOUSE	Isocitrate dehydrogenase [NAD] subunit gamma 1, mitochondrial (Isocitric dehydrogenase subunit gamma) (NAD(+)-specific ICDH subunit gamma)	Idh3g	393	isocitrate metabolic process [GO:0006102]; tricarboxylic acid cycle [GO:0006099]	isocitrate dehydrogenase complex (NAD+) [GO:0045242]; mitochondrion [GO:0005739]	ATP binding [GO:0005524]; isocitrate dehydrogenase (NAD+) activity [GO:0004449]; magnesium ion binding [GO:0000287]; NAD binding [GO:0051287]	isocitrate dehydrogenase complex (NAD+) [GO:0045242]; mitochondrion [GO:0005739]; ATP binding [GO:0005524]; isocitrate dehydrogenase (NAD+) activity [GO:0004449]; magnesium ion binding [GO:0000287]; NAD binding [GO:0051287]; isocitrate metabolic process [GO:0006102]; tricarboxylic acid cycle [GO:0006099]	GO:0000287; GO:0004449; GO:0005524; GO:0005739; GO:0006099; GO:0006102; GO:0045242; GO:0051287		BINDING 120; /ligand=citrate; /ligand_id=ChEBI:CHEBI:16947; /ligand_note=allosteric activator; /evidence=ECO:0000250|UniProtKB:P51553; BINDING 133; /ligand=citrate; /ligand_id=ChEBI:CHEBI:16947; /ligand_note=allosteric activator; /evidence=ECO:0000250|UniProtKB:P51553; BINDING 136; /ligand=substrate; /evidence=ECO:0000250|UniProtKB:P51553; BINDING 167; /ligand=substrate; /evidence=ECO:0000250|Uni…	cellular organisms (no rank), Eukaryota (superkingdom), Opisthokonta (clade), Metazoa (kingdom), Eumetazoa (clade), Bilateria (clade), Deuterostomia (clade), Chordata (phylum), Craniata (subphylum), Vertebrata (clade), Gnathostomata (clade), Teleostomi (clade), Euteleostomi (clade), Sarcopterygii (superclass), Dipnotetrapodomorpha (clade), Tetrapoda (clade), Amniota (clade), Mammalia (class), The…	131567 (no rank), 2759 (superkingdom), 33154 (clade), 33208 (kingdom), 6072 (clade), 33213 (clade), 33511 (clade), 7711 (phylum), 89593 (subphylum), 7742 (clade), 7776 (clade), 117570 (clade), 117571 (clade), 8287 (superclass), 1338369 (clade), 32523 (clade), 32524 (clade), 40674 (class), 32525 (clade), 9347 (clade), 1437010 (clade), 314146 (superorder), 314147 (clade), 9989 (order), 1963758 (sub…			SUBUNIT: Heterooligomer of subunits alpha (IDH3A), beta (IDH3B), and gamma (IDH3G) in the apparent ratio of 2:1:1. The heterodimer containing one IDH3A and one IDH3B subunit and the heterodimer containing one IDH3A and one IDH3G subunit assemble into a heterotetramer (which contains two subunits of IDH3A, one of IDH3B and one of IDH3G) and further into the heterooctamer. {ECO:0000250|UniProtKB:P5…
P82347	0.995681	21.7491	3.97183	0.0036608	0.0351698	-2.11074	reviewed	SGCD_MOUSE	Delta-sarcoglycan (Delta-SG) (35 kDa dystrophin-associated glycoprotein) (35DAG)	Sgcd	289	calcium ion homeostasis [GO:0055074]; calcium-mediated signaling [GO:0019722]; cardiac muscle cell contraction [GO:0086003]; cardiac muscle cell development [GO:0055013]; cardiac muscle contraction [GO:0060048]; coronary vasculature morphogenesis [GO:0060977]; heart process [GO:0003015]; membrane organization [GO:0061024]; protein-containing complex localization [GO:0031503]	cytoskeleton [GO:0005856]; dystroglycan complex [GO:0016011]; plasma membrane [GO:0005886]; sarcoglycan complex [GO:0016012]; sarcolemma [GO:0042383]; sarcoplasmic reticulum [GO:0016529]		cytoskeleton [GO:0005856]; dystroglycan complex [GO:0016011]; plasma membrane [GO:0005886]; sarcoglycan complex [GO:0016012]; sarcolemma [GO:0042383]; sarcoplasmic reticulum [GO:0016529]; calcium ion homeostasis [GO:0055074]; calcium-mediated signaling [GO:0019722]; cardiac muscle cell contraction [GO:0086003]; cardiac muscle cell development [GO:0055013]; cardiac muscle contraction [GO:0060048];…	GO:0003015; GO:0005856; GO:0005886; GO:0016011; GO:0016012; GO:0016529; GO:0019722; GO:0031503; GO:0042383; GO:0055013; GO:0055074; GO:0060048; GO:0060977; GO:0061024; GO:0086003			cellular organisms (no rank), Eukaryota (superkingdom), Opisthokonta (clade), Metazoa (kingdom), Eumetazoa (clade), Bilateria (clade), Deuterostomia (clade), Chordata (phylum), Craniata (subphylum), Vertebrata (clade), Gnathostomata (clade), Teleostomi (clade), Euteleostomi (clade), Sarcopterygii (superclass), Dipnotetrapodomorpha (clade), Tetrapoda (clade), Amniota (clade), Mammalia (class), The…	131567 (no rank), 2759 (superkingdom), 33154 (clade), 33208 (kingdom), 6072 (clade), 33213 (clade), 33511 (clade), 7711 (phylum), 89593 (subphylum), 7742 (clade), 7776 (clade), 117570 (clade), 117571 (clade), 8287 (superclass), 1338369 (clade), 32523 (clade), 32524 (clade), 40674 (class), 32525 (clade), 9347 (clade), 1437010 (clade), 314146 (superorder), 314147 (clade), 9989 (order), 1963758 (sub…	PTM: Disulfide bonds are present.		SUBUNIT: Interacts with FLNC (By similarity). Cross-link to form 2 major subcomplexes: one consisting of SGCB, SGCD and SGCG and the other consisting of SGCB and SGCD. The association between SGCB and SGCG is particularly strong while SGCA is loosely associated with the other sarcoglycans. Interacts with DAG1. {ECO:0000250, ECO:0000269|PubMed:9864373}.
P84104	1.03638	22.8025	6.40487	0.000162259	0.00547967	1.16187	reviewed	SRSF3_MOUSE	Serine/arginine-rich splicing factor 3 (Pre-mRNA-splicing factor SRP20) (Protein X16) (Splicing factor, arginine/serine-rich 3)	Srsf3 Sfrs3 Srp20 X16	164	cellular response to leukemia inhibitory factor [GO:1990830]; insulin receptor signaling pathway [GO:0008286]; mRNA export from nucleus [GO:0006406]; mRNA processing [GO:0006397]; primary miRNA processing [GO:0031053]; regulation of mRNA splicing, via spliceosome [GO:0048024]; RNA splicing [GO:0008380]	cytoplasm [GO:0005737]; nuclear speck [GO:0016607]	phospholipase binding [GO:0043274]; primary miRNA binding [GO:0070878]; protein-RNA sequence-specific adaptor activity [GO:0160134]; RNA binding [GO:0003723]	cytoplasm [GO:0005737]; nuclear speck [GO:0016607]; phospholipase binding [GO:0043274]; primary miRNA binding [GO:0070878]; protein-RNA sequence-specific adaptor activity [GO:0160134]; RNA binding [GO:0003723]; cellular response to leukemia inhibitory factor [GO:1990830]; insulin receptor signaling pathway [GO:0008286]; mRNA export from nucleus [GO:0006406]; mRNA processing [GO:0006397]; primary …	GO:0003723; GO:0005737; GO:0006397; GO:0006406; GO:0008286; GO:0008380; GO:0016607; GO:0031053; GO:0043274; GO:0048024; GO:0070878; GO:0160134; GO:1990830			cellular organisms (no rank), Eukaryota (superkingdom), Opisthokonta (clade), Metazoa (kingdom), Eumetazoa (clade), Bilateria (clade), Deuterostomia (clade), Chordata (phylum), Craniata (subphylum), Vertebrata (clade), Gnathostomata (clade), Teleostomi (clade), Euteleostomi (clade), Sarcopterygii (superclass), Dipnotetrapodomorpha (clade), Tetrapoda (clade), Amniota (clade), Mammalia (class), The…	131567 (no rank), 2759 (superkingdom), 33154 (clade), 33208 (kingdom), 6072 (clade), 33213 (clade), 33511 (clade), 7711 (phylum), 89593 (subphylum), 7742 (clade), 7776 (clade), 117570 (clade), 117571 (clade), 8287 (superclass), 1338369 (clade), 32523 (clade), 32524 (clade), 40674 (class), 32525 (clade), 9347 (clade), 1437010 (clade), 314146 (superorder), 314147 (clade), 9989 (order), 1963758 (sub…	PTM: Phosphorylated by CLK1, CLK2, CLK3 and CLK4. Extensively phosphorylated on serine residues in the RS domain. {ECO:0000269|PubMed:9307018}.		SUBUNIT: Interacts with CPSF6 (By similarity). Interacts with SREK1/SFRS12 (By similarity). Interacts with NXF1 (By similarity). Interacts with YTHDC1, leading to recruitment to RNA elements adjacent to m6A sites (PubMed:29799838). Interacts with SRSP; increases SRSF3 binding to specific exons (By similarity). Interacts with RBMY; the interaction inhibits SRSF3 pre-mRNA splicing (PubMed:10823932)…
P97447	2.12057	28.73	9.75864	6.7862e-06	0.00109529	4.44331	reviewed	FHL1_MOUSE	Four and a half LIM domains protein 1 (FHL-1) (KyoT) (RBP-associated molecule 14-1) (RAM14-1) (Skeletal muscle LIM-protein 1) (SLIM) (SLIM-1)	Fhl1	280	cell differentiation [GO:0030154]; muscle organ development [GO:0007517]	cytoplasm [GO:0005737]; nucleus [GO:0005634]	zinc ion binding [GO:0008270]	cytoplasm [GO:0005737]; nucleus [GO:0005634]; zinc ion binding [GO:0008270]; cell differentiation [GO:0030154]; muscle organ development [GO:0007517]	GO:0005634; GO:0005737; GO:0007517; GO:0008270; GO:0030154			cellular organisms (no rank), Eukaryota (superkingdom), Opisthokonta (clade), Metazoa (kingdom), Eumetazoa (clade), Bilateria (clade), Deuterostomia (clade), Chordata (phylum), Craniata (subphylum), Vertebrata (clade), Gnathostomata (clade), Teleostomi (clade), Euteleostomi (clade), Sarcopterygii (superclass), Dipnotetrapodomorpha (clade), Tetrapoda (clade), Amniota (clade), Mammalia (class), The…	131567 (no rank), 2759 (superkingdom), 33154 (clade), 33208 (kingdom), 6072 (clade), 33213 (clade), 33511 (clade), 7711 (phylum), 89593 (subphylum), 7742 (clade), 7776 (clade), 117570 (clade), 117571 (clade), 8287 (superclass), 1338369 (clade), 32523 (clade), 32524 (clade), 40674 (class), 32525 (clade), 9347 (clade), 1437010 (clade), 314146 (superorder), 314147 (clade), 9989 (order), 1963758 (sub…		P31266
P97823	-0.869482	21.6175	-3.8062	0.00466682	0.0400652	-2.36378	reviewed	LYPA1_MOUSE	Acyl-protein thioesterase 1 (APT-1) (EC 3.1.2.-) (Lysophospholipase 1) (Lysophospholipase I) (LPL-I) (LysoPLA I) (Palmitoyl-protein hydrolase) (EC 3.1.2.22)	Lypla1 Apt1 Pla1a	230	fatty acid metabolic process [GO:0006631]; fatty acid transport [GO:0015908]; negative regulation of aggrephagy [GO:1905336]; negative regulation of Golgi to plasma membrane protein transport [GO:0042997]; protein depalmitoylation [GO:0002084]	cytosol [GO:0005829]; endoplasmic reticulum [GO:0005783]; mitochondrion [GO:0005739]; nuclear membrane [GO:0031965]; nucleoplasm [GO:0005654]; plasma membrane [GO:0005886]	lysophospholipase activity [GO:0004622]; palmitoyl-(protein) hydrolase activity [GO:0008474]; phospholipase activity [GO:0004620]	cytosol [GO:0005829]; endoplasmic reticulum [GO:0005783]; mitochondrion [GO:0005739]; nuclear membrane [GO:0031965]; nucleoplasm [GO:0005654]; plasma membrane [GO:0005886]; lysophospholipase activity [GO:0004622]; palmitoyl-(protein) hydrolase activity [GO:0008474]; phospholipase activity [GO:0004620]; fatty acid metabolic process [GO:0006631]; fatty acid transport [GO:0015908]; negative regulati…	GO:0002084; GO:0004620; GO:0004622; GO:0005654; GO:0005739; GO:0005783; GO:0005829; GO:0005886; GO:0006631; GO:0008474; GO:0015908; GO:0031965; GO:0042997; GO:1905336	ACT_SITE 119; /note=Charge relay system; /evidence=ECO:0000269|PubMed:9139730; ACT_SITE 174; /note=Charge relay system; /evidence=ECO:0000269|PubMed:9268342; ACT_SITE 208; /note=Charge relay system; /evidence=ECO:0000269|PubMed:9268342		cellular organisms (no rank), Eukaryota (superkingdom), Opisthokonta (clade), Metazoa (kingdom), Eumetazoa (clade), Bilateria (clade), Deuterostomia (clade), Chordata (phylum), Craniata (subphylum), Vertebrata (clade), Gnathostomata (clade), Teleostomi (clade), Euteleostomi (clade), Sarcopterygii (superclass), Dipnotetrapodomorpha (clade), Tetrapoda (clade), Amniota (clade), Mammalia (class), The…	131567 (no rank), 2759 (superkingdom), 33154 (clade), 33208 (kingdom), 6072 (clade), 33213 (clade), 33511 (clade), 7711 (phylum), 89593 (subphylum), 7742 (clade), 7776 (clade), 117570 (clade), 117571 (clade), 8287 (superclass), 1338369 (clade), 32523 (clade), 32524 (clade), 40674 (class), 32525 (clade), 9347 (clade), 1437010 (clade), 314146 (superorder), 314147 (clade), 9989 (order), 1963758 (sub…			SUBUNIT: Homodimer. {ECO:0000250|UniProtKB:O75608}.
P99028	-0.811719	24.9975	-4.09938	0.00304456	0.0327594	-1.91822	reviewed	QCR6_MOUSE	Cytochrome b-c1 complex subunit 6, mitochondrial (Complex III subunit 6) (Complex III subunit VIII) (Cytochrome c1 non-heme 11 kDa protein) (Mitochondrial hinge protein) (Ubiquinol-cytochrome c reductase complex 11 kDa protein)	Uqcrh	89	cellular respiration [GO:0045333]; mitochondrial electron transport, ubiquinol to cytochrome c [GO:0006122]	mitochondrial inner membrane [GO:0005743]; mitochondrion [GO:0005739]; respiratory chain complex III [GO:0045275]	ubiquinol-cytochrome-c reductase activity [GO:0008121]	mitochondrial inner membrane [GO:0005743]; mitochondrion [GO:0005739]; respiratory chain complex III [GO:0045275]; ubiquinol-cytochrome-c reductase activity [GO:0008121]; cellular respiration [GO:0045333]; mitochondrial electron transport, ubiquinol to cytochrome c [GO:0006122]	GO:0005739; GO:0005743; GO:0006122; GO:0008121; GO:0045275; GO:0045333			cellular organisms (no rank), Eukaryota (superkingdom), Opisthokonta (clade), Metazoa (kingdom), Eumetazoa (clade), Bilateria (clade), Deuterostomia (clade), Chordata (phylum), Craniata (subphylum), Vertebrata (clade), Gnathostomata (clade), Teleostomi (clade), Euteleostomi (clade), Sarcopterygii (superclass), Dipnotetrapodomorpha (clade), Tetrapoda (clade), Amniota (clade), Mammalia (class), The…	131567 (no rank), 2759 (superkingdom), 33154 (clade), 33208 (kingdom), 6072 (clade), 33213 (clade), 33511 (clade), 7711 (phylum), 89593 (subphylum), 7742 (clade), 7776 (clade), 117570 (clade), 117571 (clade), 8287 (superclass), 1338369 (clade), 32523 (clade), 32524 (clade), 40674 (class), 32525 (clade), 9347 (clade), 1437010 (clade), 314146 (superorder), 314147 (clade), 9989 (order), 1963758 (sub…			SUBUNIT: Component of the ubiquinol-cytochrome c oxidoreductase (cytochrome b-c1 complex, complex III, CIII), a multisubunit enzyme composed of 11 subunits (PubMed:34616041, PubMed:38575788). The complex is composed of 3 respiratory subunits cytochrome b, cytochrome c1 and Rieske protein UQCRFS1, 2 core protein subunits UQCRC1/QCR1 and UQCRC2/QCR2, and 6 low-molecular weight protein subunits UQCR…
Q05793	0.727071	26.3505	4.38843	0.00202246	0.0255019	-1.48996	reviewed	PGBM_MOUSE	Basement membrane-specific heparan sulfate proteoglycan core protein (HSPG) [Cleaved into: Endorepellin; LG3 peptide]	Hspg2	3707	angiogenesis [GO:0001525]; brain development [GO:0007420]; cardiac muscle tissue development [GO:0048738]; cartilage development involved in endochondral bone morphogenesis [GO:0060351]; chondrocyte differentiation [GO:0002062]; embryonic skeletal system morphogenesis [GO:0048704]; endochondral ossification [GO:0001958]; extracellular matrix organization [GO:0030198]; protein localization [GO:000…	basement membrane [GO:0005604]; collagen-containing extracellular matrix [GO:0062023]; extracellular matrix [GO:0031012]; extracellular region [GO:0005576]; Golgi lumen [GO:0005796]	calcium ion binding [GO:0005509]; protease binding [GO:0002020]	basement membrane [GO:0005604]; collagen-containing extracellular matrix [GO:0062023]; extracellular matrix [GO:0031012]; extracellular region [GO:0005576]; Golgi lumen [GO:0005796]; calcium ion binding [GO:0005509]; protease binding [GO:0002020]; angiogenesis [GO:0001525]; brain development [GO:0007420]; cardiac muscle tissue development [GO:0048738]; cartilage development involved in endochondr…	GO:0001525; GO:0001958; GO:0002020; GO:0002062; GO:0005509; GO:0005576; GO:0005604; GO:0005796; GO:0006898; GO:0007420; GO:0008104; GO:0030198; GO:0031012; GO:0048704; GO:0048738; GO:0060351; GO:0062023		BINDING 3574; /ligand=Ca(2+); /ligand_id=ChEBI:CHEBI:29108; /evidence=ECO:0000250; BINDING 3591; /ligand=Ca(2+); /ligand_id=ChEBI:CHEBI:29108; /evidence=ECO:0000250; BINDING 3641; /ligand=Ca(2+); /ligand_id=ChEBI:CHEBI:29108; /evidence=ECO:0000250; BINDING 3643; /ligand=Ca(2+); /ligand_id=ChEBI:CHEBI:29108; /evidence=ECO:0000250	cellular organisms (no rank), Eukaryota (superkingdom), Opisthokonta (clade), Metazoa (kingdom), Eumetazoa (clade), Bilateria (clade), Deuterostomia (clade), Chordata (phylum), Craniata (subphylum), Vertebrata (clade), Gnathostomata (clade), Teleostomi (clade), Euteleostomi (clade), Sarcopterygii (superclass), Dipnotetrapodomorpha (clade), Tetrapoda (clade), Amniota (clade), Mammalia (class), The…	131567 (no rank), 2759 (superkingdom), 33154 (clade), 33208 (kingdom), 6072 (clade), 33213 (clade), 33511 (clade), 7711 (phylum), 89593 (subphylum), 7742 (clade), 7776 (clade), 117570 (clade), 117571 (clade), 8287 (superclass), 1338369 (clade), 32523 (clade), 32524 (clade), 40674 (class), 32525 (clade), 9347 (clade), 1437010 (clade), 314146 (superorder), 314147 (clade), 9989 (order), 1963758 (sub…	PTM: Proteolytic processing produces the C-terminal angiogenic peptide, endorepellin. This peptide can be further processed to produce the LG3 peptide (By similarity). {ECO:0000250}.; PTM: O-glycosylated. Contains three heparan sulfate chains. Also contains chondroitin sulfate. {ECO:0000250|UniProtKB:P98160}.		SUBUNIT: Has a strong tendency to aggregate in dimers or stellate structures. Interacts with other basement membrane components such as laminin, prolargin and collagen type IV. Interacts with COL13A1 (By similarity). Interacts with FGFBP1 (By similarity). Interacts with VWA1 (PubMed:16407285). Interacts (via C-terminus) with ECM1 (via C-terminus) (By similarity). Interacts with SVEP1 (PubMed:3679…
Q07417	-0.698864	23.8618	-4.5918	0.00152782	0.0230268	-1.19567	reviewed	ACADS_MOUSE	Short-chain specific acyl-CoA dehydrogenase, mitochondrial (SCAD) (EC 1.3.8.1) (Butyryl-CoA dehydrogenase)	Acads	412	fatty acid beta-oxidation using acyl-CoA dehydrogenase [GO:0033539]	mitochondrial matrix [GO:0005759]; mitochondrion [GO:0005739]	acyl-CoA dehydrogenase activity [GO:0003995]; flavin adenine dinucleotide binding [GO:0050660]; short-chain fatty acyl-CoA dehydrogenase activity [GO:0016937]	mitochondrial matrix [GO:0005759]; mitochondrion [GO:0005739]; acyl-CoA dehydrogenase activity [GO:0003995]; flavin adenine dinucleotide binding [GO:0050660]; short-chain fatty acyl-CoA dehydrogenase activity [GO:0016937]; fatty acid beta-oxidation using acyl-CoA dehydrogenase [GO:0033539]	GO:0003995; GO:0005739; GO:0005759; GO:0016937; GO:0033539; GO:0050660	ACT_SITE 392; /note=Proton acceptor; /evidence=ECO:0000250|UniProtKB:P15651	BINDING 152..161; /ligand=FAD; /ligand_id=ChEBI:CHEBI:57692; /ligand_note=ligand shared between dimeric partners; /note=in other chain; /evidence=ECO:0000250|UniProtKB:P15651; BINDING 161; /ligand=substrate; /evidence=ECO:0000250|UniProtKB:P15651; BINDING 185..187; /ligand=FAD; /ligand_id=ChEBI:CHEBI:57692; /ligand_note=ligand shared between dimeric partners; /note=in other chain; /evidence=ECO:0…	cellular organisms (no rank), Eukaryota (superkingdom), Opisthokonta (clade), Metazoa (kingdom), Eumetazoa (clade), Bilateria (clade), Deuterostomia (clade), Chordata (phylum), Craniata (subphylum), Vertebrata (clade), Gnathostomata (clade), Teleostomi (clade), Euteleostomi (clade), Sarcopterygii (superclass), Dipnotetrapodomorpha (clade), Tetrapoda (clade), Amniota (clade), Mammalia (class), The…	131567 (no rank), 2759 (superkingdom), 33154 (clade), 33208 (kingdom), 6072 (clade), 33213 (clade), 33511 (clade), 7711 (phylum), 89593 (subphylum), 7742 (clade), 7776 (clade), 117570 (clade), 117571 (clade), 8287 (superclass), 1338369 (clade), 32523 (clade), 32524 (clade), 40674 (class), 32525 (clade), 9347 (clade), 1437010 (clade), 314146 (superorder), 314147 (clade), 9989 (order), 1963758 (sub…			SUBUNIT: Homotetramer. {ECO:0000250|UniProtKB:P16219}.
Q3TVI8	1.23137	22.6323	4.48473	0.00176958	0.0234106	-1.34986	reviewed	PBIP1_MOUSE	Pre-B-cell leukemia transcription factor-interacting protein 1 (Hematopoietic PBX-interacting protein)	Pbxip1 Hpip	727	articular cartilage development [GO:0061975]; cell adhesion [GO:0007155]; cell migration [GO:0016477]; extracellular matrix disassembly [GO:0022617]; gene expression [GO:0010467]; gene expression involved in extracellular matrix organization [GO:1901148]; hemopoiesis [GO:0030097]; positive regulation of chondrocyte proliferation [GO:1902732]; positive regulation of DNA-templated transcription [GO…	chromatin [GO:0000785]; cytoplasm [GO:0005737]; cytosol [GO:0005829]; microtubule [GO:0005874]; nucleoplasm [GO:0005654]; nucleus [GO:0005634]; transcription regulator complex [GO:0005667]	DNA-binding transcription factor binding [GO:0140297]; transcription coactivator activity [GO:0003713]; transcription corepressor activity [GO:0003714]	chromatin [GO:0000785]; cytoplasm [GO:0005737]; cytosol [GO:0005829]; microtubule [GO:0005874]; nucleoplasm [GO:0005654]; nucleus [GO:0005634]; transcription regulator complex [GO:0005667]; DNA-binding transcription factor binding [GO:0140297]; transcription coactivator activity [GO:0003713]; transcription corepressor activity [GO:0003714]; articular cartilage development [GO:0061975]; cell adhes…	GO:0000785; GO:0002532; GO:0003713; GO:0003714; GO:0005634; GO:0005654; GO:0005667; GO:0005737; GO:0005829; GO:0005874; GO:0007155; GO:0010467; GO:0016477; GO:0022617; GO:0030097; GO:0030177; GO:0045893; GO:0061975; GO:0140297; GO:1901148; GO:1902732			cellular organisms (no rank), Eukaryota (superkingdom), Opisthokonta (clade), Metazoa (kingdom), Eumetazoa (clade), Bilateria (clade), Deuterostomia (clade), Chordata (phylum), Craniata (subphylum), Vertebrata (clade), Gnathostomata (clade), Teleostomi (clade), Euteleostomi (clade), Sarcopterygii (superclass), Dipnotetrapodomorpha (clade), Tetrapoda (clade), Amniota (clade), Mammalia (class), The…	131567 (no rank), 2759 (superkingdom), 33154 (clade), 33208 (kingdom), 6072 (clade), 33213 (clade), 33511 (clade), 7711 (phylum), 89593 (subphylum), 7742 (clade), 7776 (clade), 117570 (clade), 117571 (clade), 8287 (superclass), 1338369 (clade), 32523 (clade), 32524 (clade), 40674 (class), 32525 (clade), 9347 (clade), 1437010 (clade), 314146 (superorder), 314147 (clade), 9989 (order), 1963758 (sub…			SUBUNIT: Interacts with ESR1, PBX1, PBX2 and PBX3 (By similarity). Interacts with TEX11. {ECO:0000250, ECO:0000269|PubMed:22383461}.
Q3V1D3	-0.608935	27.8658	-3.79106	0.00477248	0.040541	-2.38708	reviewed	AMPD1_MOUSE	AMP deaminase 1 (EC 3.5.4.6) (AMP deaminase isoform M) (Myoadenylate deaminase)	Ampd1	745	GMP salvage [GO:0032263]; IMP salvage [GO:0032264]		AMP deaminase activity [GO:0003876]; identical protein binding [GO:0042802]; metal ion binding [GO:0046872]	AMP deaminase activity [GO:0003876]; identical protein binding [GO:0042802]; metal ion binding [GO:0046872]; GMP salvage [GO:0032263]; IMP salvage [GO:0032264]	GO:0003876; GO:0032263; GO:0032264; GO:0042802; GO:0046872	ACT_SITE 592; /note=Proton acceptor; /evidence=ECO:0000255|PROSITE-ProRule:PRU10104	BINDING 301; /ligand=Zn(2+); /ligand_id=ChEBI:CHEBI:29105; /ligand_note=catalytic; /evidence=ECO:0000250; BINDING 303; /ligand=substrate; /evidence=ECO:0000250; BINDING 303; /ligand=Zn(2+); /ligand_id=ChEBI:CHEBI:29105; /ligand_note=catalytic; /evidence=ECO:0000250; BINDING 372..377; /ligand=substrate; /evidence=ECO:0000250; BINDING 570; /ligand=Zn(2+); /ligand_id=ChEBI:CHEBI:29105; /ligand_note=…	cellular organisms (no rank), Eukaryota (superkingdom), Opisthokonta (clade), Metazoa (kingdom), Eumetazoa (clade), Bilateria (clade), Deuterostomia (clade), Chordata (phylum), Craniata (subphylum), Vertebrata (clade), Gnathostomata (clade), Teleostomi (clade), Euteleostomi (clade), Sarcopterygii (superclass), Dipnotetrapodomorpha (clade), Tetrapoda (clade), Amniota (clade), Mammalia (class), The…	131567 (no rank), 2759 (superkingdom), 33154 (clade), 33208 (kingdom), 6072 (clade), 33213 (clade), 33511 (clade), 7711 (phylum), 89593 (subphylum), 7742 (clade), 7776 (clade), 117570 (clade), 117571 (clade), 8287 (superclass), 1338369 (clade), 32523 (clade), 32524 (clade), 40674 (class), 32525 (clade), 9347 (clade), 1437010 (clade), 314146 (superorder), 314147 (clade), 9989 (order), 1963758 (sub…			SUBUNIT: Homotetramer. {ECO:0000250}.
Q4U4S6	6.62486	22.096	18.8952	3.18442e-08	2.56983e-05	9.46372	reviewed	XIRP2_MOUSE	Xin actin-binding repeat-containing protein 2 (Beta-xin) (Cardiomyopathy-associated protein 3) (Myogenic MEF2-activated Xin-related protein) (Myomaxin) (mXinbeta)	Xirp2 Cmya3 Xin2	3784	actin cytoskeleton organization [GO:0030036]; cardiac muscle tissue morphogenesis [GO:0055008]; cell-cell junction organization [GO:0045216]; positive regulation of protein localization [GO:1903829]; regulation of actin filament organization [GO:0110053]; ventricular septum development [GO:0003281]	cell-cell junction [GO:0005911]; cytosol [GO:0005829]; focal adhesion [GO:0005925]; stress fiber [GO:0001725]; Z disc [GO:0030018]	actin filament binding [GO:0051015]; alpha-actinin binding [GO:0051393]; metal ion binding [GO:0046872]	cell-cell junction [GO:0005911]; cytosol [GO:0005829]; focal adhesion [GO:0005925]; stress fiber [GO:0001725]; Z disc [GO:0030018]; actin filament binding [GO:0051015]; alpha-actinin binding [GO:0051393]; metal ion binding [GO:0046872]; actin cytoskeleton organization [GO:0030036]; cardiac muscle tissue morphogenesis [GO:0055008]; cell-cell junction organization [GO:0045216]; positive regulation …	GO:0001725; GO:0003281; GO:0005829; GO:0005911; GO:0005925; GO:0030018; GO:0030036; GO:0045216; GO:0046872; GO:0051015; GO:0051393; GO:0055008; GO:0110053; GO:1903829			cellular organisms (no rank), Eukaryota (superkingdom), Opisthokonta (clade), Metazoa (kingdom), Eumetazoa (clade), Bilateria (clade), Deuterostomia (clade), Chordata (phylum), Craniata (subphylum), Vertebrata (clade), Gnathostomata (clade), Teleostomi (clade), Euteleostomi (clade), Sarcopterygii (superclass), Dipnotetrapodomorpha (clade), Tetrapoda (clade), Amniota (clade), Mammalia (class), The…	131567 (no rank), 2759 (superkingdom), 33154 (clade), 33208 (kingdom), 6072 (clade), 33213 (clade), 33511 (clade), 7711 (phylum), 89593 (subphylum), 7742 (clade), 7776 (clade), 117570 (clade), 117571 (clade), 8287 (superclass), 1338369 (clade), 32523 (clade), 32524 (clade), 40674 (class), 32525 (clade), 9347 (clade), 1437010 (clade), 314146 (superorder), 314147 (clade), 9989 (order), 1963758 (sub…		Q61762; Q9JJV9	SUBUNIT: Interacts with ACTN2 (PubMed:17046827). Interacts with F-actin (By similarity). Interacts with NEBL (via SH3 domain) (By similarity). Interacts with Kcna5/Kv1.5 and Scn5a/Nav1.5; the interactions are required for normal action potential configuration in the heart (PubMed:29306897). {ECO:0000250|UniProtKB:A4UGR9, ECO:0000269|PubMed:17046827, ECO:0000269|PubMed:29306897}.; SUBUNIT: [Isofor…
Q5XKE0	-0.903772	30.3017	-5.21704	0.000669855	0.0142256	-0.328729	reviewed	MYPC2_MOUSE	Myosin-binding protein C, fast-type (Fast MyBP-C) (C-protein, skeletal muscle fast isoform)	Mybpc2	1136	cell adhesion [GO:0007155]; muscle contraction [GO:0006936]	cytoskeleton [GO:0005856]; myosin filament [GO:0032982]	actin binding [GO:0003779]; structural constituent of cytoskeleton [GO:0005200]	cytoskeleton [GO:0005856]; myosin filament [GO:0032982]; actin binding [GO:0003779]; structural constituent of cytoskeleton [GO:0005200]; cell adhesion [GO:0007155]; muscle contraction [GO:0006936]	GO:0003779; GO:0005200; GO:0005856; GO:0006936; GO:0007155; GO:0032982			cellular organisms (no rank), Eukaryota (superkingdom), Opisthokonta (clade), Metazoa (kingdom), Eumetazoa (clade), Bilateria (clade), Deuterostomia (clade), Chordata (phylum), Craniata (subphylum), Vertebrata (clade), Gnathostomata (clade), Teleostomi (clade), Euteleostomi (clade), Sarcopterygii (superclass), Dipnotetrapodomorpha (clade), Tetrapoda (clade), Amniota (clade), Mammalia (class), The…	131567 (no rank), 2759 (superkingdom), 33154 (clade), 33208 (kingdom), 6072 (clade), 33213 (clade), 33511 (clade), 7711 (phylum), 89593 (subphylum), 7742 (clade), 7776 (clade), 117570 (clade), 117571 (clade), 8287 (superclass), 1338369 (clade), 32523 (clade), 32524 (clade), 40674 (class), 32525 (clade), 9347 (clade), 1437010 (clade), 314146 (superorder), 314147 (clade), 9989 (order), 1963758 (sub…
Q60668	0.662531	21.2873	3.86254	0.00429506	0.0380892	-2.27734	reviewed	HNRPD_MOUSE	Heterogeneous nuclear ribonucleoprotein D0 (hnRNP D0) (AU-rich element RNA-binding protein 1)	Hnrnpd Auf1 Hnrpd	355	3'-UTR-mediated mRNA destabilization [GO:0061158]; cellular response to amino acid stimulus [GO:0071230]; cellular response to estradiol stimulus [GO:0071392]; cellular response to nitric oxide [GO:0071732]; cellular response to putrescine [GO:1904586]; cerebellum development [GO:0021549]; circadian regulation of translation [GO:0097167]; CRD-mediated mRNA stabilization [GO:0070934]; hepatocyte d…	cytosol [GO:0005829]; glutamatergic synapse [GO:0098978]; mCRD-mediated mRNA stability complex [GO:0106002]; nucleoplasm [GO:0005654]; postsynaptic density [GO:0014069]; ribonucleoprotein complex [GO:1990904]; synapse [GO:0045202]	chromatin binding [GO:0003682]; histone deacetylase binding [GO:0042826]; minor groove of adenine-thymine-rich DNA binding [GO:0003680]; mRNA 3'-UTR AU-rich region binding [GO:0035925]; RNA binding [GO:0003723]; telomeric DNA binding [GO:0042162]	cytosol [GO:0005829]; glutamatergic synapse [GO:0098978]; mCRD-mediated mRNA stability complex [GO:0106002]; nucleoplasm [GO:0005654]; postsynaptic density [GO:0014069]; ribonucleoprotein complex [GO:1990904]; synapse [GO:0045202]; chromatin binding [GO:0003682]; histone deacetylase binding [GO:0042826]; minor groove of adenine-thymine-rich DNA binding [GO:0003680]; mRNA 3'-UTR AU-rich region bin…	GO:0001889; GO:0003680; GO:0003682; GO:0003723; GO:0005654; GO:0005829; GO:0014069; GO:0021549; GO:0032212; GO:0035925; GO:0042162; GO:0042752; GO:0042826; GO:0043488; GO:0045202; GO:0045727; GO:0045944; GO:0051592; GO:0051602; GO:0061158; GO:0070934; GO:0071230; GO:0071392; GO:0071732; GO:0097167; GO:0098978; GO:0106002; GO:1900152; GO:1901355; GO:1904355; GO:1904383; GO:1904586; GO:1990828; GO:…			cellular organisms (no rank), Eukaryota (superkingdom), Opisthokonta (clade), Metazoa (kingdom), Eumetazoa (clade), Bilateria (clade), Deuterostomia (clade), Chordata (phylum), Craniata (subphylum), Vertebrata (clade), Gnathostomata (clade), Teleostomi (clade), Euteleostomi (clade), Sarcopterygii (superclass), Dipnotetrapodomorpha (clade), Tetrapoda (clade), Amniota (clade), Mammalia (class), The…	131567 (no rank), 2759 (superkingdom), 33154 (clade), 33208 (kingdom), 6072 (clade), 33213 (clade), 33511 (clade), 7711 (phylum), 89593 (subphylum), 7742 (clade), 7776 (clade), 117570 (clade), 117571 (clade), 8287 (superclass), 1338369 (clade), 32523 (clade), 32524 (clade), 40674 (class), 32525 (clade), 9347 (clade), 1437010 (clade), 314146 (superorder), 314147 (clade), 9989 (order), 1963758 (sub…	PTM: Methylated by PRMT1, in an insulin-dependent manner. The PRMT1-mediated methylation regulates its phosphorylation (By similarity). {ECO:0000250|UniProtKB:Q14103}.; PTM: Arg-345 is dimethylated, probably to asymmetric dimethylarginine. {ECO:0000250|UniProtKB:Q14103}.	P06151	SUBUNIT: Identified in a IGF2BP1-dependent mRNP granule complex containing untranslated mRNAs. Part of a complex associated with the FOS mCRD domain and consisting of PABPC1, PAIP1, CSDE1/UNR and SYNCRIP. Interacts with IGF2BP2. Interacts with GTPBP1. Interacts with EIF4G1; the interaction requires RNA. Interacts with EIF3B and RPS3. {ECO:0000250|UniProtKB:Q14103}.
Q60675	0.946456	25.8504	7.26116	6.50266e-05	0.00333636	2.11828	reviewed	LAMA2_MOUSE	Laminin subunit alpha-2 (Laminin M chain) (Laminin-12 subunit alpha) (Laminin-2 subunit alpha) (Laminin-4 subunit alpha) (Merosin heavy chain)	Lama2	3118	axon guidance [GO:0007411]; cell adhesion [GO:0007155]; positive regulation of cell adhesion [GO:0045785]; positive regulation of integrin-mediated signaling pathway [GO:2001046]; positive regulation of muscle cell differentiation [GO:0051149]; positive regulation of synaptic transmission, cholinergic [GO:0032224]; regulation of basement membrane organization [GO:0110011]; regulation of cell migr…	basement membrane [GO:0005604]; collagen-containing extracellular matrix [GO:0062023]; dendritic spine [GO:0043197]; extracellular region [GO:0005576]; neuromuscular junction [GO:0031594]; protein complex involved in cell-matrix adhesion [GO:0098637]; sarcolemma [GO:0042383]; synaptic cleft [GO:0043083]	signaling receptor binding [GO:0005102]	basement membrane [GO:0005604]; collagen-containing extracellular matrix [GO:0062023]; dendritic spine [GO:0043197]; extracellular region [GO:0005576]; neuromuscular junction [GO:0031594]; protein complex involved in cell-matrix adhesion [GO:0098637]; sarcolemma [GO:0042383]; synaptic cleft [GO:0043083]; signaling receptor binding [GO:0005102]; axon guidance [GO:0007411]; cell adhesion [GO:000715…	GO:0005102; GO:0005576; GO:0005604; GO:0007155; GO:0007411; GO:0014037; GO:0030334; GO:0031594; GO:0032224; GO:0042383; GO:0043083; GO:0043197; GO:0045785; GO:0045995; GO:0051149; GO:0062023; GO:0098637; GO:0110011; GO:2001046			cellular organisms (no rank), Eukaryota (superkingdom), Opisthokonta (clade), Metazoa (kingdom), Eumetazoa (clade), Bilateria (clade), Deuterostomia (clade), Chordata (phylum), Craniata (subphylum), Vertebrata (clade), Gnathostomata (clade), Teleostomi (clade), Euteleostomi (clade), Sarcopterygii (superclass), Dipnotetrapodomorpha (clade), Tetrapoda (clade), Amniota (clade), Mammalia (class), The…	131567 (no rank), 2759 (superkingdom), 33154 (clade), 33208 (kingdom), 6072 (clade), 33213 (clade), 33511 (clade), 7711 (phylum), 89593 (subphylum), 7742 (clade), 7776 (clade), 117570 (clade), 117571 (clade), 8287 (superclass), 1338369 (clade), 32523 (clade), 32524 (clade), 40674 (class), 32525 (clade), 9347 (clade), 1437010 (clade), 314146 (superorder), 314147 (clade), 9989 (order), 1963758 (sub…			SUBUNIT: Laminin is a complex glycoprotein, consisting of three different polypeptide chains (alpha, beta, gamma), which are bound to each other by disulfide bonds into a cross-shaped molecule comprising one long and three short arms with globules at each end. Alpha-2 is a subunit of laminin-2 (laminin-211 or merosin), laminin-4 (laminin-221 or S-merosin) and laminin-12 (laminin-213). Interacts w…
Q60692	0.671145	23.0849	4.49784	0.00173788	0.0234106	-1.3309	reviewed	PSB6_MOUSE	Proteasome subunit beta type-6 (EC 3.4.25.1) (Low molecular mass protein 19) (Macropain delta chain) (Multicatalytic endopeptidase complex delta chain) (Proteasome delta chain) (Proteasome subunit Y) (Proteasome subunit beta-1) (beta-1)	Psmb6 Lmp19	238	proteolysis involved in protein catabolic process [GO:0051603]	cytosol [GO:0005829]; mitochondrion [GO:0005739]; nucleoplasm [GO:0005654]; proteasome core complex [GO:0005839]; proteasome core complex, beta-subunit complex [GO:0019774]	threonine-type endopeptidase activity [GO:0004298]	cytosol [GO:0005829]; mitochondrion [GO:0005739]; nucleoplasm [GO:0005654]; proteasome core complex [GO:0005839]; proteasome core complex, beta-subunit complex [GO:0019774]; threonine-type endopeptidase activity [GO:0004298]; proteolysis involved in protein catabolic process [GO:0051603]	GO:0004298; GO:0005654; GO:0005739; GO:0005829; GO:0005839; GO:0019774; GO:0051603	ACT_SITE 34; /note=Nucleophile; /evidence=ECO:0000250|UniProtKB:P28072		cellular organisms (no rank), Eukaryota (superkingdom), Opisthokonta (clade), Metazoa (kingdom), Eumetazoa (clade), Bilateria (clade), Deuterostomia (clade), Chordata (phylum), Craniata (subphylum), Vertebrata (clade), Gnathostomata (clade), Teleostomi (clade), Euteleostomi (clade), Sarcopterygii (superclass), Dipnotetrapodomorpha (clade), Tetrapoda (clade), Amniota (clade), Mammalia (class), The…	131567 (no rank), 2759 (superkingdom), 33154 (clade), 33208 (kingdom), 6072 (clade), 33213 (clade), 33511 (clade), 7711 (phylum), 89593 (subphylum), 7742 (clade), 7776 (clade), 117570 (clade), 117571 (clade), 8287 (superclass), 1338369 (clade), 32523 (clade), 32524 (clade), 40674 (class), 32525 (clade), 9347 (clade), 1437010 (clade), 314146 (superorder), 314147 (clade), 9989 (order), 1963758 (sub…			SUBUNIT: The 26S proteasome consists of a 20S proteasome core and two 19S regulatory subunits. The 20S proteasome core is a barrel-shaped complex made of 28 subunits that are arranged in four stacked rings. The two outer rings are each formed by seven alpha subunits, and the two inner rings are formed by seven beta subunits. The proteolytic activity is exerted by three beta-subunits PSMB5, PSMB6 …
Q60854	1.38402	22.6622	4.20359	0.00262342	0.0311338	-1.7625	reviewed	SPB6_MOUSE	Serpin B6 (Placental thrombin inhibitor) (Proteinase inhibitor 6) (PI-6)	Serpinb6 Serpinb6a Spi3	378	gonad development [GO:0008406]; negative regulation of endopeptidase activity [GO:0010951]	collagen-containing extracellular matrix [GO:0062023]; cytoplasm [GO:0005737]; extracellular space [GO:0005615]	serine-type endopeptidase inhibitor activity [GO:0004867]	collagen-containing extracellular matrix [GO:0062023]; cytoplasm [GO:0005737]; extracellular space [GO:0005615]; serine-type endopeptidase inhibitor activity [GO:0004867]; gonad development [GO:0008406]; negative regulation of endopeptidase activity [GO:0010951]	GO:0004867; GO:0005615; GO:0005737; GO:0008406; GO:0010951; GO:0062023			cellular organisms (no rank), Eukaryota (superkingdom), Opisthokonta (clade), Metazoa (kingdom), Eumetazoa (clade), Bilateria (clade), Deuterostomia (clade), Chordata (phylum), Craniata (subphylum), Vertebrata (clade), Gnathostomata (clade), Teleostomi (clade), Euteleostomi (clade), Sarcopterygii (superclass), Dipnotetrapodomorpha (clade), Tetrapoda (clade), Amniota (clade), Mammalia (class), The…	131567 (no rank), 2759 (superkingdom), 33154 (clade), 33208 (kingdom), 6072 (clade), 33213 (clade), 33511 (clade), 7711 (phylum), 89593 (subphylum), 7742 (clade), 7776 (clade), 117570 (clade), 117571 (clade), 8287 (superclass), 1338369 (clade), 32523 (clade), 32524 (clade), 40674 (class), 32525 (clade), 9347 (clade), 1437010 (clade), 314146 (superorder), 314147 (clade), 9989 (order), 1963758 (sub…			SUBUNIT: Forms a complex with the monomeric form of beta-tryptase. {ECO:0000250}.
Q60936	-0.63714	24.9702	-3.56316	0.00670958	0.0440583	-2.74079	reviewed	COQ8A_MOUSE	Atypical kinase COQ8A, mitochondrial (EC 2.7.-.-) (Chaperone activity of bc1 complex-like) (Chaperone-ABC1-like) (Coenzyme Q protein 8A) (aarF domain-containing protein kinase 3)	Coq8a Adck3 Cabc1	645	phosphorylation [GO:0016310]; ubiquinone biosynthetic process [GO:0006744]	membrane [GO:0016020]; mitochondrion [GO:0005739]	ADP binding [GO:0043531]; ATP binding [GO:0005524]; kinase activity [GO:0016301]	membrane [GO:0016020]; mitochondrion [GO:0005739]; ADP binding [GO:0043531]; ATP binding [GO:0005524]; kinase activity [GO:0016301]; phosphorylation [GO:0016310]; ubiquinone biosynthetic process [GO:0006744]	GO:0005524; GO:0005739; GO:0006744; GO:0016020; GO:0016301; GO:0016310; GO:0043531	ACT_SITE 485; /note=Proton acceptor; /evidence=ECO:0000250|UniProtKB:Q8NI60	BINDING 337; /ligand=ATP; /ligand_id=ChEBI:CHEBI:30616; /evidence=ECO:0000250|UniProtKB:Q8NI60; BINDING 355; /ligand=ATP; /ligand_id=ChEBI:CHEBI:30616; /evidence=ECO:0000250|UniProtKB:Q8NI60; BINDING 442..445; /ligand=ATP; /ligand_id=ChEBI:CHEBI:30616; /evidence=ECO:0000250|UniProtKB:Q8NI60; BINDING 490; /ligand=ATP; /ligand_id=ChEBI:CHEBI:30616; /evidence=ECO:0000250|UniProtKB:Q8NI60; BINDING 50…	cellular organisms (no rank), Eukaryota (superkingdom), Opisthokonta (clade), Metazoa (kingdom), Eumetazoa (clade), Bilateria (clade), Deuterostomia (clade), Chordata (phylum), Craniata (subphylum), Vertebrata (clade), Gnathostomata (clade), Teleostomi (clade), Euteleostomi (clade), Sarcopterygii (superclass), Dipnotetrapodomorpha (clade), Tetrapoda (clade), Amniota (clade), Mammalia (class), The…	131567 (no rank), 2759 (superkingdom), 33154 (clade), 33208 (kingdom), 6072 (clade), 33213 (clade), 33511 (clade), 7711 (phylum), 89593 (subphylum), 7742 (clade), 7776 (clade), 117570 (clade), 117571 (clade), 8287 (superclass), 1338369 (clade), 32523 (clade), 32524 (clade), 40674 (class), 32525 (clade), 9347 (clade), 1437010 (clade), 314146 (superorder), 314147 (clade), 9989 (order), 1963758 (sub…			SUBUNIT: Homodimer; homodimerizes via its transmembrane region. Interacts with the multi-subunit COQ enzyme complex, composed of at least COQ3, COQ4, COQ5, COQ6, COQ7 and COQ9. {ECO:0000250|UniProtKB:Q8NI60}.
Q61292	1.65269	23.383	6.81329	0.000103823	0.00465475	1.62963	reviewed	LAMB2_MOUSE	Laminin subunit beta-2 (Laminin-11 subunit beta) (Laminin-14 subunit beta) (Laminin-15 subunit beta) (Laminin-3 subunit beta) (Laminin-4 subunit beta) (Laminin-7 subunit beta) (Laminin-9 subunit beta) (S-laminin subunit beta) (S-LAM beta)	Lamb2 Lams	1799	astrocyte development [GO:0014002]; axon extension involved in regeneration [GO:0048677]; axon guidance [GO:0007411]; cell adhesion [GO:0007155]; cell morphogenesis [GO:0000902]; metanephric glomerular basement membrane development [GO:0072274]; metanephric podocyte development [GO:0072249]; neuromuscular junction development [GO:0007528]; neuron projection development [GO:0031175]; positive regu…	basement membrane [GO:0005604]; collagen-containing extracellular matrix [GO:0062023]; extracellular region [GO:0005576]; laminin complex [GO:0043256]; laminin-3 complex [GO:0005608]; neuromuscular junction [GO:0031594]; protein complex involved in cell-matrix adhesion [GO:0098637]; synapse [GO:0045202]; synaptic cleft [GO:0043083]	integrin binding [GO:0005178]; structural constituent of synapse-associated extracellular matrix [GO:0150043]	basement membrane [GO:0005604]; collagen-containing extracellular matrix [GO:0062023]; extracellular region [GO:0005576]; laminin complex [GO:0043256]; laminin-3 complex [GO:0005608]; neuromuscular junction [GO:0031594]; protein complex involved in cell-matrix adhesion [GO:0098637]; synapse [GO:0045202]; synaptic cleft [GO:0043083]; integrin binding [GO:0005178]; structural constituent of synapse…	GO:0000902; GO:0005178; GO:0005576; GO:0005604; GO:0005608; GO:0007155; GO:0007411; GO:0007528; GO:0007601; GO:0014002; GO:0014044; GO:0031175; GO:0031594; GO:0043083; GO:0043256; GO:0045202; GO:0045785; GO:0048677; GO:0050808; GO:0051149; GO:0060041; GO:0062023; GO:0072249; GO:0072274; GO:0098637; GO:0110011; GO:0150043; GO:2001046			cellular organisms (no rank), Eukaryota (superkingdom), Opisthokonta (clade), Metazoa (kingdom), Eumetazoa (clade), Bilateria (clade), Deuterostomia (clade), Chordata (phylum), Craniata (subphylum), Vertebrata (clade), Gnathostomata (clade), Teleostomi (clade), Euteleostomi (clade), Sarcopterygii (superclass), Dipnotetrapodomorpha (clade), Tetrapoda (clade), Amniota (clade), Mammalia (class), The…	131567 (no rank), 2759 (superkingdom), 33154 (clade), 33208 (kingdom), 6072 (clade), 33213 (clade), 33511 (clade), 7711 (phylum), 89593 (subphylum), 7742 (clade), 7776 (clade), 117570 (clade), 117571 (clade), 8287 (superclass), 1338369 (clade), 32523 (clade), 32524 (clade), 40674 (class), 32525 (clade), 9347 (clade), 1437010 (clade), 314146 (superorder), 314147 (clade), 9989 (order), 1963758 (sub…			SUBUNIT: Laminin is a complex glycoprotein, consisting of three different polypeptide chains (alpha, beta, gamma), which are bound to each other by disulfide bonds into a cross-shaped molecule comprising one long and three short arms with globules at each end. Beta-2 is a subunit of laminin-3 (laminin-121 or S-laminin), laminin-4 (laminin-221 or S-merosin), laminin-7 (laminin-321 or KS-laminin), …
Q61425	-0.920285	25.1328	-4.73818	0.00125321	0.0210448	-0.98754	reviewed	HCDH_MOUSE	Hydroxyacyl-coenzyme A dehydrogenase, mitochondrial (HCDH) (EC 1.1.1.35) (Medium and short-chain L-3-hydroxyacyl-coenzyme A dehydrogenase) (Short-chain 3-hydroxyacyl-CoA dehydrogenase)	Hadh Hadhsc Mschad Schad	314	cell differentiation [GO:0030154]; fatty acid beta-oxidation [GO:0006635]; negative regulation of insulin secretion [GO:0046676]; positive regulation of cold-induced thermogenesis [GO:0120162]; regulation of insulin secretion [GO:0050796]; response to activity [GO:0014823]; response to insulin [GO:0032868]; response to xenobiotic stimulus [GO:0009410]; spermatogenesis [GO:0007283]	cytosol [GO:0005829]; mitochondrial inner membrane [GO:0005743]; mitochondrial matrix [GO:0005759]; mitochondrion [GO:0005739]; nucleoplasm [GO:0005654]	3-hydroxyacyl-CoA dehydrogenase activity [GO:0003857]; identical protein binding [GO:0042802]; NAD+ binding [GO:0070403]	cytosol [GO:0005829]; mitochondrial inner membrane [GO:0005743]; mitochondrial matrix [GO:0005759]; mitochondrion [GO:0005739]; nucleoplasm [GO:0005654]; 3-hydroxyacyl-CoA dehydrogenase activity [GO:0003857]; identical protein binding [GO:0042802]; NAD+ binding [GO:0070403]; cell differentiation [GO:0030154]; fatty acid beta-oxidation [GO:0006635]; negative regulation of insulin secretion [GO:004…	GO:0003857; GO:0005654; GO:0005739; GO:0005743; GO:0005759; GO:0005829; GO:0006635; GO:0007283; GO:0009410; GO:0014823; GO:0030154; GO:0032868; GO:0042802; GO:0046676; GO:0050796; GO:0070403; GO:0120162		BINDING 34..39; /ligand=NAD(+); /ligand_id=ChEBI:CHEBI:57540; /evidence=ECO:0000250|UniProtKB:Q16836; BINDING 57; /ligand=NAD(+); /ligand_id=ChEBI:CHEBI:57540; /evidence=ECO:0000250|UniProtKB:Q16836; BINDING 73; /ligand=CoA; /ligand_id=ChEBI:CHEBI:57287; /evidence=ECO:0000250|UniProtKB:Q16836; BINDING 80; /ligand=CoA; /ligand_id=ChEBI:CHEBI:57287; /evidence=ECO:0000250|UniProtKB:Q16836; BINDING 1…	cellular organisms (no rank), Eukaryota (superkingdom), Opisthokonta (clade), Metazoa (kingdom), Eumetazoa (clade), Bilateria (clade), Deuterostomia (clade), Chordata (phylum), Craniata (subphylum), Vertebrata (clade), Gnathostomata (clade), Teleostomi (clade), Euteleostomi (clade), Sarcopterygii (superclass), Dipnotetrapodomorpha (clade), Tetrapoda (clade), Amniota (clade), Mammalia (class), The…	131567 (no rank), 2759 (superkingdom), 33154 (clade), 33208 (kingdom), 6072 (clade), 33213 (clade), 33511 (clade), 7711 (phylum), 89593 (subphylum), 7742 (clade), 7776 (clade), 117570 (clade), 117571 (clade), 8287 (superclass), 1338369 (clade), 32523 (clade), 32524 (clade), 40674 (class), 32525 (clade), 9347 (clade), 1437010 (clade), 314146 (superorder), 314147 (clade), 9989 (order), 1963758 (sub…	PTM: Succinylation at Lys-81, adjacent to a coenzyme A binding site. Desuccinylated by SIRT5. {ECO:0000269|PubMed:23806337}.		SUBUNIT: Homodimer (By similarity). Interacts with GLUD1; this interaction inhibits the activation of glutamate dehydrogenase 1 (GLUD1) (PubMed:20670938). {ECO:0000250|UniProtKB:P00348, ECO:0000269|PubMed:20670938}.
Q61598	0.77194	23.5825	4.15895	0.00279563	0.0316008	-1.82903	reviewed	GDIB_MOUSE	Rab GDP dissociation inhibitor beta (Rab GDI beta) (GDI-3) (Guanosine diphosphate dissociation inhibitor 2) (GDI-2)	Gdi2 Gdi3	445	negative regulation of cilium assembly [GO:1902018]; negative regulation of protein localization to cilium [GO:1903565]; protein transport [GO:0015031]; small GTPase-mediated signal transduction [GO:0007264]; vesicle-mediated transport [GO:0016192]	Golgi apparatus [GO:0005794]; membrane [GO:0016020]; myelin sheath [GO:0043209]; synapse [GO:0045202]	GTPase activator activity [GO:0005096]; Rab GDP-dissociation inhibitor activity [GO:0005093]; small GTPase binding [GO:0031267]	Golgi apparatus [GO:0005794]; membrane [GO:0016020]; myelin sheath [GO:0043209]; synapse [GO:0045202]; GTPase activator activity [GO:0005096]; Rab GDP-dissociation inhibitor activity [GO:0005093]; small GTPase binding [GO:0031267]; negative regulation of cilium assembly [GO:1902018]; negative regulation of protein localization to cilium [GO:1903565]; protein transport [GO:0015031]; small GTPase-m…	GO:0005093; GO:0005096; GO:0005794; GO:0007264; GO:0015031; GO:0016020; GO:0016192; GO:0031267; GO:0043209; GO:0045202; GO:1902018; GO:1903565			cellular organisms (no rank), Eukaryota (superkingdom), Opisthokonta (clade), Metazoa (kingdom), Eumetazoa (clade), Bilateria (clade), Deuterostomia (clade), Chordata (phylum), Craniata (subphylum), Vertebrata (clade), Gnathostomata (clade), Teleostomi (clade), Euteleostomi (clade), Sarcopterygii (superclass), Dipnotetrapodomorpha (clade), Tetrapoda (clade), Amniota (clade), Mammalia (class), The…	131567 (no rank), 2759 (superkingdom), 33154 (clade), 33208 (kingdom), 6072 (clade), 33213 (clade), 33511 (clade), 7711 (phylum), 89593 (subphylum), 7742 (clade), 7776 (clade), 117570 (clade), 117571 (clade), 8287 (superclass), 1338369 (clade), 32523 (clade), 32524 (clade), 40674 (class), 32525 (clade), 9347 (clade), 1437010 (clade), 314146 (superorder), 314147 (clade), 9989 (order), 1963758 (sub…		Q8BMD2	SUBUNIT: Interacts with RHOH (By similarity). Interacts with the GDP-bound inactive forms of RAB3A, RAB3B, RAB3C, RAB5A, RAB5B, RAB5C, RAB8A, RAB8B, RAB10, RAB12, RAB35, and RAB43; binds RAB3D to a lesser extent (PubMed:25860027). Interacts with DZIP1; this interaction negatively regulates the interaction of GDI2 with GDP-bound RAB8A (PubMed:25860027). {ECO:0000250|UniProtKB:P50395, ECO:0000269|P…
Q62425	-0.720168	25.9822	-4.05392	0.00325043	0.0339118	-1.9866	reviewed	NDUA4_MOUSE	Cytochrome c oxidase subunit NDUFA4	Ndufa4	82		mitochondrial inner membrane [GO:0005743]; mitochondrion [GO:0005739]; respiratory chain complex I [GO:0045271]; respiratory chain complex IV [GO:0045277]	protein-containing complex binding [GO:0044877]	mitochondrial inner membrane [GO:0005743]; mitochondrion [GO:0005739]; respiratory chain complex I [GO:0045271]; respiratory chain complex IV [GO:0045277]; protein-containing complex binding [GO:0044877]	GO:0005739; GO:0005743; GO:0044877; GO:0045271; GO:0045277			cellular organisms (no rank), Eukaryota (superkingdom), Opisthokonta (clade), Metazoa (kingdom), Eumetazoa (clade), Bilateria (clade), Deuterostomia (clade), Chordata (phylum), Craniata (subphylum), Vertebrata (clade), Gnathostomata (clade), Teleostomi (clade), Euteleostomi (clade), Sarcopterygii (superclass), Dipnotetrapodomorpha (clade), Tetrapoda (clade), Amniota (clade), Mammalia (class), The…	131567 (no rank), 2759 (superkingdom), 33154 (clade), 33208 (kingdom), 6072 (clade), 33213 (clade), 33511 (clade), 7711 (phylum), 89593 (subphylum), 7742 (clade), 7776 (clade), 117570 (clade), 117571 (clade), 8287 (superclass), 1338369 (clade), 32523 (clade), 32524 (clade), 40674 (class), 32525 (clade), 9347 (clade), 1437010 (clade), 314146 (superorder), 314147 (clade), 9989 (order), 1963758 (sub…			SUBUNIT: Component of the cytochrome c oxidase (complex IV, CIV), a multisubunit enzyme composed of 14 subunits. The complex is composed of a catalytic core of 3 subunits MT-CO1, MT-CO2 and MT-CO3, encoded in the mitochondrial DNA, and 11 supernumerary subunits COX4I, COX5A, COX5B, COX6A, COX6B, COX6C, COX7A, COX7B, COX7C, COX8 and NDUFA4, which are encoded in the nuclear genome. The complex exis…
Q62465	1.12415	20.872	4.51701	0.00169262	0.0234106	-1.3032	reviewed	VAT1_MOUSE	Synaptic vesicle membrane protein VAT-1 homolog (EC 1.-.-.-)	Vat1 Vat-1	406	negative regulation of mitochondrial fusion [GO:0010637]	mitochondrial outer membrane [GO:0005741]	oxidoreductase activity [GO:0016491]; zinc ion binding [GO:0008270]	mitochondrial outer membrane [GO:0005741]; oxidoreductase activity [GO:0016491]; zinc ion binding [GO:0008270]; negative regulation of mitochondrial fusion [GO:0010637]	GO:0005741; GO:0008270; GO:0010637; GO:0016491			cellular organisms (no rank), Eukaryota (superkingdom), Opisthokonta (clade), Metazoa (kingdom), Eumetazoa (clade), Bilateria (clade), Deuterostomia (clade), Chordata (phylum), Craniata (subphylum), Vertebrata (clade), Gnathostomata (clade), Teleostomi (clade), Euteleostomi (clade), Sarcopterygii (superclass), Dipnotetrapodomorpha (clade), Tetrapoda (clade), Amniota (clade), Mammalia (class), The…	131567 (no rank), 2759 (superkingdom), 33154 (clade), 33208 (kingdom), 6072 (clade), 33213 (clade), 33511 (clade), 7711 (phylum), 89593 (subphylum), 7742 (clade), 7776 (clade), 117570 (clade), 117571 (clade), 8287 (superclass), 1338369 (clade), 32523 (clade), 32524 (clade), 40674 (class), 32525 (clade), 9347 (clade), 1437010 (clade), 314146 (superorder), 314147 (clade), 9989 (order), 1963758 (sub…
Q6NT99	-1.06296	20.2932	-3.40887	0.00848214	0.0496021	-2.98318	reviewed	DUS23_MOUSE	Dual specificity protein phosphatase 23 (EC 3.1.3.16) (EC 3.1.3.48) (Low molecular mass dual specificity phosphatase 3) (LDP-3)	Dusp23 Ldp3	150	dephosphorylation [GO:0016311]	cytosol [GO:0005829]; nucleoplasm [GO:0005654]	calmodulin-dependent protein phosphatase activity [GO:0033192]; histone H2AXS140 phosphatase activity [GO:0140791]; histone H2AXY142 phosphatase activity [GO:0140793]; MAP kinase serine/threonine phosphatase activity [GO:1990439]; myosin phosphatase activity [GO:0017018]; non-membrane spanning protein tyrosine phosphatase activity [GO:0004726]; phosphatase activity [GO:0016791]; protein tyrosine …	cytosol [GO:0005829]; nucleoplasm [GO:0005654]; calmodulin-dependent protein phosphatase activity [GO:0033192]; histone H2AXS140 phosphatase activity [GO:0140791]; histone H2AXY142 phosphatase activity [GO:0140793]; MAP kinase serine/threonine phosphatase activity [GO:1990439]; myosin phosphatase activity [GO:0017018]; non-membrane spanning protein tyrosine phosphatase activity [GO:0004726]; phos…	GO:0004726; GO:0005654; GO:0005829; GO:0008138; GO:0016311; GO:0016791; GO:0017018; GO:0030946; GO:0033192; GO:0140791; GO:0140793; GO:0180004; GO:0180005; GO:0180006; GO:0180007; GO:0180008; GO:1990439	ACT_SITE 95; /note=Phosphocysteine intermediate; /evidence=ECO:0000255|PROSITE-ProRule:PRU00160		cellular organisms (no rank), Eukaryota (superkingdom), Opisthokonta (clade), Metazoa (kingdom), Eumetazoa (clade), Bilateria (clade), Deuterostomia (clade), Chordata (phylum), Craniata (subphylum), Vertebrata (clade), Gnathostomata (clade), Teleostomi (clade), Euteleostomi (clade), Sarcopterygii (superclass), Dipnotetrapodomorpha (clade), Tetrapoda (clade), Amniota (clade), Mammalia (class), The…	131567 (no rank), 2759 (superkingdom), 33154 (clade), 33208 (kingdom), 6072 (clade), 33213 (clade), 33511 (clade), 7711 (phylum), 89593 (subphylum), 7742 (clade), 7776 (clade), 117570 (clade), 117571 (clade), 8287 (superclass), 1338369 (clade), 32523 (clade), 32524 (clade), 40674 (class), 32525 (clade), 9347 (clade), 1437010 (clade), 314146 (superorder), 314147 (clade), 9989 (order), 1963758 (sub…
Q6P8J7	-0.81208	29.0452	-3.42247	0.00830773	0.0489368	-2.96173	reviewed	KCRS_MOUSE	Creatine kinase S-type, mitochondrial (EC 2.7.3.2) (Basic-type mitochondrial creatine kinase) (Mib-CK) (Sarcomeric mitochondrial creatine kinase) (S-MtCK)	Ckmt2	419	phosphocreatine biosynthetic process [GO:0046314]; phosphocreatine metabolic process [GO:0006603]	mitochondrial inner membrane [GO:0005743]; mitochondrion [GO:0005739]	ATP binding [GO:0005524]; creatine kinase activity [GO:0004111]	mitochondrial inner membrane [GO:0005743]; mitochondrion [GO:0005739]; ATP binding [GO:0005524]; creatine kinase activity [GO:0004111]; phosphocreatine biosynthetic process [GO:0046314]; phosphocreatine metabolic process [GO:0006603]	GO:0004111; GO:0005524; GO:0005739; GO:0005743; GO:0006603; GO:0046314		BINDING 162..166; /ligand=ATP; /ligand_id=ChEBI:CHEBI:30616; /evidence=ECO:0000255|PROSITE-ProRule:PRU00843; BINDING 225; /ligand=ATP; /ligand_id=ChEBI:CHEBI:30616; /evidence=ECO:0000255|PROSITE-ProRule:PRU00843; BINDING 270; /ligand=ATP; /ligand_id=ChEBI:CHEBI:30616; /evidence=ECO:0000255|PROSITE-ProRule:PRU00843; BINDING 326; /ligand=ATP; /ligand_id=ChEBI:CHEBI:30616; /evidence=ECO:0000255|PROS…	cellular organisms (no rank), Eukaryota (superkingdom), Opisthokonta (clade), Metazoa (kingdom), Eumetazoa (clade), Bilateria (clade), Deuterostomia (clade), Chordata (phylum), Craniata (subphylum), Vertebrata (clade), Gnathostomata (clade), Teleostomi (clade), Euteleostomi (clade), Sarcopterygii (superclass), Dipnotetrapodomorpha (clade), Tetrapoda (clade), Amniota (clade), Mammalia (class), The…	131567 (no rank), 2759 (superkingdom), 33154 (clade), 33208 (kingdom), 6072 (clade), 33213 (clade), 33511 (clade), 7711 (phylum), 89593 (subphylum), 7742 (clade), 7776 (clade), 117570 (clade), 117571 (clade), 8287 (superclass), 1338369 (clade), 32523 (clade), 32524 (clade), 40674 (class), 32525 (clade), 9347 (clade), 1437010 (clade), 314146 (superorder), 314147 (clade), 9989 (order), 1963758 (sub…			SUBUNIT: Exists as an octamer composed of four CKMT2 homodimers. {ECO:0000250}.
Q6PHZ2	1.84308	20.1529	4.10074	0.00303861	0.0327594	-1.91618	reviewed	KCC2D_MOUSE	Calcium/calmodulin-dependent protein kinase type II subunit delta (CaM kinase II subunit delta) (CaMK-II subunit delta) (EC 2.7.11.17)	Camk2d Kiaa4163	499	calcium ion transport [GO:0006816]; cardiac muscle cell contraction [GO:0086003]; cardiac muscle contraction [GO:0060048]; G1/S transition of mitotic cell cycle [GO:0000082]; peptidyl-threonine phosphorylation [GO:0018107]; positive regulation of cardiac muscle hypertrophy [GO:0010613]; protein phosphorylation [GO:0006468]; regulation of cellular localization [GO:0060341]; regulation of relaxatio…	axon initial segment [GO:0043194]; cochlear hair cell ribbon synapse [GO:0098683]; cytoplasm [GO:0005737]; intercalated disc [GO:0014704]; neuromuscular junction [GO:0031594]; neuronal cell body [GO:0043025]; nucleus [GO:0005634]; postsynaptic cytosol [GO:0099524]; sarcoplasmic reticulum [GO:0016529]; sarcoplasmic reticulum membrane [GO:0033017]; T-tubule [GO:0030315]	ATP binding [GO:0005524]; calcium/calmodulin-dependent protein kinase activity [GO:0004683]; calmodulin binding [GO:0005516]; protein serine kinase activity [GO:0106310]; protein serine/threonine kinase activity [GO:0004674]; transmembrane transporter binding [GO:0044325]	axon initial segment [GO:0043194]; cochlear hair cell ribbon synapse [GO:0098683]; cytoplasm [GO:0005737]; intercalated disc [GO:0014704]; neuromuscular junction [GO:0031594]; neuronal cell body [GO:0043025]; nucleus [GO:0005634]; postsynaptic cytosol [GO:0099524]; sarcoplasmic reticulum [GO:0016529]; sarcoplasmic reticulum membrane [GO:0033017]; T-tubule [GO:0030315]; ATP binding [GO:0005524]; c…	GO:0000082; GO:0002028; GO:0004674; GO:0004683; GO:0005516; GO:0005524; GO:0005634; GO:0005737; GO:0006468; GO:0006816; GO:0010613; GO:0014704; GO:0016529; GO:0018107; GO:0030315; GO:0031594; GO:0033017; GO:0043025; GO:0043194; GO:0044325; GO:0055119; GO:0060048; GO:0060341; GO:0086003; GO:0098683; GO:0099524; GO:0106310; GO:1901897	ACT_SITE 136; /note=Proton acceptor; /evidence=ECO:0000255|PROSITE-ProRule:PRU00159, ECO:0000255|PROSITE-ProRule:PRU10027	BINDING 20..28; /ligand=ATP; /ligand_id=ChEBI:CHEBI:30616; /evidence=ECO:0000255|PROSITE-ProRule:PRU00159; BINDING 43; /ligand=ATP; /ligand_id=ChEBI:CHEBI:30616; /evidence=ECO:0000255|PROSITE-ProRule:PRU00159	cellular organisms (no rank), Eukaryota (superkingdom), Opisthokonta (clade), Metazoa (kingdom), Eumetazoa (clade), Bilateria (clade), Deuterostomia (clade), Chordata (phylum), Craniata (subphylum), Vertebrata (clade), Gnathostomata (clade), Teleostomi (clade), Euteleostomi (clade), Sarcopterygii (superclass), Dipnotetrapodomorpha (clade), Tetrapoda (clade), Amniota (clade), Mammalia (class), The…	131567 (no rank), 2759 (superkingdom), 33154 (clade), 33208 (kingdom), 6072 (clade), 33213 (clade), 33511 (clade), 7711 (phylum), 89593 (subphylum), 7742 (clade), 7776 (clade), 117570 (clade), 117571 (clade), 8287 (superclass), 1338369 (clade), 32523 (clade), 32524 (clade), 40674 (class), 32525 (clade), 9347 (clade), 1437010 (clade), 314146 (superorder), 314147 (clade), 9989 (order), 1963758 (sub…	PTM: Autophosphorylation of Thr-287 following activation by Ca(2+)/calmodulin. Phosphorylation of Thr-287 locks the kinase into an activated state (By similarity). {ECO:0000250}.	Q9JJ28; E9Q401	SUBUNIT: CAMK2 is composed of 4 different chains: alpha (CAMK2A), beta (CAMK2B), gamma (CAMK2G), and delta (CAMK2D). The different isoforms assemble into homo- or heteromultimeric holoenzymes composed of 12 subunits with two hexameric rings stacked one on top of the other. Interacts with RRAD (By similarity). Interacts with CACNB2. {ECO:0000250, ECO:0000269|PubMed:20194790}.
Q7TSH2	-0.549019	24.5092	-3.75631	0.00502466	0.0408064	-2.44064	reviewed	KPBB_MOUSE	Phosphorylase b kinase regulatory subunit beta (Phosphorylase kinase subunit beta)	Phkb	1085	glucose homeostasis [GO:0042593]; glycogen metabolic process [GO:0005977]; positive regulation of glycogen catabolic process [GO:0045819]	plasma membrane [GO:0005886]	calmodulin binding [GO:0005516]	plasma membrane [GO:0005886]; calmodulin binding [GO:0005516]; glucose homeostasis [GO:0042593]; glycogen metabolic process [GO:0005977]; positive regulation of glycogen catabolic process [GO:0045819]	GO:0005516; GO:0005886; GO:0005977; GO:0042593; GO:0045819			cellular organisms (no rank), Eukaryota (superkingdom), Opisthokonta (clade), Metazoa (kingdom), Eumetazoa (clade), Bilateria (clade), Deuterostomia (clade), Chordata (phylum), Craniata (subphylum), Vertebrata (clade), Gnathostomata (clade), Teleostomi (clade), Euteleostomi (clade), Sarcopterygii (superclass), Dipnotetrapodomorpha (clade), Tetrapoda (clade), Amniota (clade), Mammalia (class), The…	131567 (no rank), 2759 (superkingdom), 33154 (clade), 33208 (kingdom), 6072 (clade), 33213 (clade), 33511 (clade), 7711 (phylum), 89593 (subphylum), 7742 (clade), 7776 (clade), 117570 (clade), 117571 (clade), 8287 (superclass), 1338369 (clade), 32523 (clade), 32524 (clade), 40674 (class), 32525 (clade), 9347 (clade), 1437010 (clade), 314146 (superorder), 314147 (clade), 9989 (order), 1963758 (sub…	PTM: Although the final Cys may be farnesylated, the terminal tripeptide is probably not removed, and the C-terminus is not methylated. {ECO:0000250|UniProtKB:P12798}.		SUBUNIT: Hexadecamer of 4 heterotetramers, each composed of alpha, beta, gamma, and delta subunits. Alpha (PHKA1 or PHKA2) and beta (PHKB) are regulatory subunits, gamma (PHKG1 or PHKG2) is the catalytic subunit, and delta is calmodulin (By similarity). {ECO:0000250}.
Q80XB4	1.99856	26.045	8.84883	1.45407e-05	0.00167634	3.66736	reviewed	NRAP_MOUSE	Nebulin-related-anchoring protein (N-RAP)	Nrap	1728	actin cytoskeleton organization [GO:0030036]	fascia adherens [GO:0005916]; muscle tendon junction [GO:0005927]; myofibril [GO:0030016]; Z disc [GO:0030018]	actin binding [GO:0003779]; actin filament binding [GO:0051015]; metal ion binding [GO:0046872]; muscle alpha-actinin binding [GO:0051371]; vinculin binding [GO:0017166]	fascia adherens [GO:0005916]; muscle tendon junction [GO:0005927]; myofibril [GO:0030016]; Z disc [GO:0030018]; actin binding [GO:0003779]; actin filament binding [GO:0051015]; metal ion binding [GO:0046872]; muscle alpha-actinin binding [GO:0051371]; vinculin binding [GO:0017166]; actin cytoskeleton organization [GO:0030036]	GO:0003779; GO:0005916; GO:0005927; GO:0017166; GO:0030016; GO:0030018; GO:0030036; GO:0046872; GO:0051015; GO:0051371			cellular organisms (no rank), Eukaryota (superkingdom), Opisthokonta (clade), Metazoa (kingdom), Eumetazoa (clade), Bilateria (clade), Deuterostomia (clade), Chordata (phylum), Craniata (subphylum), Vertebrata (clade), Gnathostomata (clade), Teleostomi (clade), Euteleostomi (clade), Sarcopterygii (superclass), Dipnotetrapodomorpha (clade), Tetrapoda (clade), Amniota (clade), Mammalia (class), The…	131567 (no rank), 2759 (superkingdom), 33154 (clade), 33208 (kingdom), 6072 (clade), 33213 (clade), 33511 (clade), 7711 (phylum), 89593 (subphylum), 7742 (clade), 7776 (clade), 117570 (clade), 117571 (clade), 8287 (superclass), 1338369 (clade), 32523 (clade), 32524 (clade), 40674 (class), 32525 (clade), 9347 (clade), 1437010 (clade), 314146 (superorder), 314147 (clade), 9989 (order), 1963758 (sub…			SUBUNIT: Interacts with actin, alpha-actinin, KLHL41, TLN1 and VCL. Interacts with CSRP3. {ECO:0000250|UniProtKB:Q86VF7, ECO:0000269|PubMed:10320340, ECO:0000269|PubMed:11732910, ECO:0000269|PubMed:12692149, ECO:0000269|PubMed:9295142}.
Q8BG32	1.16762	21.7353	5.04836	0.000832098	0.0159882	-0.556928	reviewed	PSD11_MOUSE	26S proteasome non-ATPase regulatory subunit 11 (26S proteasome regulatory subunit RPN6) (26S proteasome regulatory subunit S9) (26S proteasome regulatory subunit p44.5)	Psmd11	422	proteasome assembly [GO:0043248]; stem cell differentiation [GO:0048863]; ubiquitin-dependent protein catabolic process [GO:0006511]	proteasome accessory complex [GO:0022624]; proteasome regulatory particle [GO:0005838]		proteasome accessory complex [GO:0022624]; proteasome regulatory particle [GO:0005838]; proteasome assembly [GO:0043248]; stem cell differentiation [GO:0048863]; ubiquitin-dependent protein catabolic process [GO:0006511]	GO:0005838; GO:0006511; GO:0022624; GO:0043248; GO:0048863			cellular organisms (no rank), Eukaryota (superkingdom), Opisthokonta (clade), Metazoa (kingdom), Eumetazoa (clade), Bilateria (clade), Deuterostomia (clade), Chordata (phylum), Craniata (subphylum), Vertebrata (clade), Gnathostomata (clade), Teleostomi (clade), Euteleostomi (clade), Sarcopterygii (superclass), Dipnotetrapodomorpha (clade), Tetrapoda (clade), Amniota (clade), Mammalia (class), The…	131567 (no rank), 2759 (superkingdom), 33154 (clade), 33208 (kingdom), 6072 (clade), 33213 (clade), 33511 (clade), 7711 (phylum), 89593 (subphylum), 7742 (clade), 7776 (clade), 117570 (clade), 117571 (clade), 8287 (superclass), 1338369 (clade), 32523 (clade), 32524 (clade), 40674 (class), 32525 (clade), 9347 (clade), 1437010 (clade), 314146 (superorder), 314147 (clade), 9989 (order), 1963758 (sub…			SUBUNIT: Component of the 19S proteasome regulatory particle complex. The 26S proteasome consists of a 20S core particle (CP) and two 19S regulatory subunits (RP). The regulatory particle is made of a lid composed of 9 subunits including PSMD11, a base containing 6 ATPases and few additional components. {ECO:0000250|UniProtKB:O00231, ECO:0000269|PubMed:16857966}.
Q8BH59	-0.66842	27.8746	-4.51905	0.00168788	0.0234106	-1.30026	reviewed	S2512_MOUSE	Electrogenic aspartate/glutamate antiporter SLC25A12, mitochondrial (Solute carrier family 25 member 12)	Slc25a12	677	aspartate transmembrane transport [GO:0015810]; L-glutamate transmembrane transport [GO:0015813]; malate-aspartate shuttle [GO:0043490]; response to calcium ion [GO:0051592]	mitochondrial inner membrane [GO:0005743]; mitochondrion [GO:0005739]; myelin sheath [GO:0043209]	3-sulfino-L-alanine: proton, glutamate antiporter activity [GO:0000514]; acidic amino acid transmembrane transporter activity [GO:0015172]; aspartate:glutamate, proton antiporter activity [GO:0000515]; calcium ion binding [GO:0005509]; identical protein binding [GO:0042802]	mitochondrial inner membrane [GO:0005743]; mitochondrion [GO:0005739]; myelin sheath [GO:0043209]; 3-sulfino-L-alanine: proton, glutamate antiporter activity [GO:0000514]; acidic amino acid transmembrane transporter activity [GO:0015172]; aspartate:glutamate, proton antiporter activity [GO:0000515]; calcium ion binding [GO:0005509]; identical protein binding [GO:0042802]; aspartate transmembrane …	GO:0000514; GO:0000515; GO:0005509; GO:0005739; GO:0005743; GO:0015172; GO:0015810; GO:0015813; GO:0042802; GO:0043209; GO:0043490; GO:0051592		BINDING 65; /ligand=Ca(2+); /ligand_id=ChEBI:CHEBI:29108; /evidence=ECO:0000250|UniProtKB:O75746; BINDING 67; /ligand=Ca(2+); /ligand_id=ChEBI:CHEBI:29108; /evidence=ECO:0000250|UniProtKB:O75746; BINDING 69; /ligand=Ca(2+); /ligand_id=ChEBI:CHEBI:29108; /evidence=ECO:0000250|UniProtKB:O75746; BINDING 71; /ligand=Ca(2+); /ligand_id=ChEBI:CHEBI:29108; /evidence=ECO:0000250|UniProtKB:O75746; BINDING…	cellular organisms (no rank), Eukaryota (superkingdom), Opisthokonta (clade), Metazoa (kingdom), Eumetazoa (clade), Bilateria (clade), Deuterostomia (clade), Chordata (phylum), Craniata (subphylum), Vertebrata (clade), Gnathostomata (clade), Teleostomi (clade), Euteleostomi (clade), Sarcopterygii (superclass), Dipnotetrapodomorpha (clade), Tetrapoda (clade), Amniota (clade), Mammalia (class), The…	131567 (no rank), 2759 (superkingdom), 33154 (clade), 33208 (kingdom), 6072 (clade), 33213 (clade), 33511 (clade), 7711 (phylum), 89593 (subphylum), 7742 (clade), 7776 (clade), 117570 (clade), 117571 (clade), 8287 (superclass), 1338369 (clade), 32523 (clade), 32524 (clade), 40674 (class), 32525 (clade), 9347 (clade), 1437010 (clade), 314146 (superorder), 314147 (clade), 9989 (order), 1963758 (sub…			SUBUNIT: Homodimer (via N-terminus). {ECO:0000250|UniProtKB:O75746}.
Q8BIW1	2.44377	19.0525	3.77182	0.00491039	0.0405937	-2.41672	reviewed	PRUN1_MOUSE	Exopolyphosphatase PRUNE1 (EC 3.6.1.1) (PRUNEM1)	Prune1 Prune	454	regulation of microtubule polymerization [GO:0031113]; regulation of neurogenesis [GO:0050767]	cytosol [GO:0005829]; focal adhesion [GO:0005925]; nucleus [GO:0005634]	inorganic diphosphate phosphatase activity [GO:0004427]; metal ion binding [GO:0046872]; phosphatase activity [GO:0016791]; tubulin binding [GO:0015631]	cytosol [GO:0005829]; focal adhesion [GO:0005925]; nucleus [GO:0005634]; inorganic diphosphate phosphatase activity [GO:0004427]; metal ion binding [GO:0046872]; phosphatase activity [GO:0016791]; tubulin binding [GO:0015631]; regulation of microtubule polymerization [GO:0031113]; regulation of neurogenesis [GO:0050767]	GO:0004427; GO:0005634; GO:0005829; GO:0005925; GO:0015631; GO:0016791; GO:0031113; GO:0046872; GO:0050767		BINDING 28; /ligand=Mn(2+); /ligand_id=ChEBI:CHEBI:29035; /ligand_label=1; /evidence=ECO:0000250; BINDING 30; /ligand=Mn(2+); /ligand_id=ChEBI:CHEBI:29035; /ligand_label=2; /evidence=ECO:0000250; BINDING 106; /ligand=Mn(2+); /ligand_id=ChEBI:CHEBI:29035; /ligand_label=1; /evidence=ECO:0000250; BINDING 106; /ligand=Mn(2+); /ligand_id=ChEBI:CHEBI:29035; /ligand_label=2; /evidence=ECO:0000250; BINDI…	cellular organisms (no rank), Eukaryota (superkingdom), Opisthokonta (clade), Metazoa (kingdom), Eumetazoa (clade), Bilateria (clade), Deuterostomia (clade), Chordata (phylum), Craniata (subphylum), Vertebrata (clade), Gnathostomata (clade), Teleostomi (clade), Euteleostomi (clade), Sarcopterygii (superclass), Dipnotetrapodomorpha (clade), Tetrapoda (clade), Amniota (clade), Mammalia (class), The…	131567 (no rank), 2759 (superkingdom), 33154 (clade), 33208 (kingdom), 6072 (clade), 33213 (clade), 33511 (clade), 7711 (phylum), 89593 (subphylum), 7742 (clade), 7776 (clade), 117570 (clade), 117571 (clade), 8287 (superclass), 1338369 (clade), 32523 (clade), 32524 (clade), 40674 (class), 32525 (clade), 9347 (clade), 1437010 (clade), 314146 (superorder), 314147 (clade), 9989 (order), 1963758 (sub…			SUBUNIT: Homooligomer. Able to homodimerize via its C-terminal domain. Interacts with NME1. Interacts with GSK3; at focal adhesion complexes where paxillin and vinculin are colocalized. Interacts with alpha and beta tubulin. {ECO:0000250|UniProtKB:Q86TP1}.
Q8BMF4	-0.607667	27.1074	-3.57779	0.00656311	0.0440583	-2.71792	reviewed	ODP2_MOUSE	Dihydrolipoyllysine-residue acetyltransferase component of pyruvate dehydrogenase complex, mitochondrial (EC 2.3.1.12) (Dihydrolipoamide acetyltransferase component of pyruvate dehydrogenase complex) (Pyruvate dehydrogenase complex component E2) (PDC-E2) (PDCE2)	Dlat	642	acetyl-CoA biosynthetic process from pyruvate [GO:0006086]; glucose metabolic process [GO:0006006]; pyruvate catabolic process [GO:0042867]; tricarboxylic acid cycle [GO:0006099]	acetyltransferase complex [GO:1902493]; mitochondrial matrix [GO:0005759]; mitochondrion [GO:0005739]; myelin sheath [GO:0043209]; pyruvate dehydrogenase complex [GO:0045254]	acetyltransferase activity [GO:0016407]; dihydrolipoyllysine-residue acetyltransferase activity [GO:0004742]; identical protein binding [GO:0042802]; pyruvate dehydrogenase (NAD+) activity [GO:0034604]	acetyltransferase complex [GO:1902493]; mitochondrial matrix [GO:0005759]; mitochondrion [GO:0005739]; myelin sheath [GO:0043209]; pyruvate dehydrogenase complex [GO:0045254]; acetyltransferase activity [GO:0016407]; dihydrolipoyllysine-residue acetyltransferase activity [GO:0004742]; identical protein binding [GO:0042802]; pyruvate dehydrogenase (NAD+) activity [GO:0034604]; acetyl-CoA biosynthe…	GO:0004742; GO:0005739; GO:0005759; GO:0006006; GO:0006086; GO:0006099; GO:0016407; GO:0034604; GO:0042802; GO:0042867; GO:0043209; GO:0045254; GO:1902493	ACT_SITE 615; /evidence=ECO:0000250|UniProtKB:Q9N0F1; ACT_SITE 619; /evidence=ECO:0000250|UniProtKB:Q9N0F1	BINDING 456; /ligand=CoA; /ligand_id=ChEBI:CHEBI:57287; /evidence=ECO:0000250|UniProtKB:P11181; BINDING 470; /ligand=CoA; /ligand_id=ChEBI:CHEBI:57287; /evidence=ECO:0000250|UniProtKB:P11181; BINDING 561; /ligand=CoA; /ligand_id=ChEBI:CHEBI:57287; /evidence=ECO:0000250|UniProtKB:P11181; BINDING 562; /ligand=CoA; /ligand_id=ChEBI:CHEBI:57287; /evidence=ECO:0000250|UniProtKB:P11181; BINDING 586; /l…	cellular organisms (no rank), Eukaryota (superkingdom), Opisthokonta (clade), Metazoa (kingdom), Eumetazoa (clade), Bilateria (clade), Deuterostomia (clade), Chordata (phylum), Craniata (subphylum), Vertebrata (clade), Gnathostomata (clade), Teleostomi (clade), Euteleostomi (clade), Sarcopterygii (superclass), Dipnotetrapodomorpha (clade), Tetrapoda (clade), Amniota (clade), Mammalia (class), The…	131567 (no rank), 2759 (superkingdom), 33154 (clade), 33208 (kingdom), 6072 (clade), 33213 (clade), 33511 (clade), 7711 (phylum), 89593 (subphylum), 7742 (clade), 7776 (clade), 117570 (clade), 117571 (clade), 8287 (superclass), 1338369 (clade), 32523 (clade), 32524 (clade), 40674 (class), 32525 (clade), 9347 (clade), 1437010 (clade), 314146 (superorder), 314147 (clade), 9989 (order), 1963758 (sub…	PTM: Delipoylated at Lys-131 and Lys-258 by SIRT4, delipoylation decreases the PHD complex activity. {ECO:0000250|UniProtKB:P10515}.		SUBUNIT: Part of the pyruvate dehydrogenase complex (PDHc) that is a multi-enzyme complex composed of multiple copies of three enzymes, pyruvate dehydrogenase (subunits PDH1A and PDHB, E1 component), dihydrolipoamide acetyltransferase (DLAT, E2 component), and dihydrolipoamide dehydrogenase (DLD, E3 component) to which is added an additional protein the E3-binding protein (PDHX, E3BP) (By similar…
Q8BTM8	0.985983	22.7338	3.67291	0.00568945	0.0429382	-2.56975	reviewed	FLNA_MOUSE	Filamin-A (FLN-A) (Actin-binding protein 280) (ABP-280) (Alpha-filamin) (Endothelial actin-binding protein) (Filamin-1) (Non-muscle filamin)	Flna Fln Fln1	2647	actin crosslink formation [GO:0051764]; actin cytoskeleton organization [GO:0030036]; adenylate cyclase-inhibiting dopamine receptor signaling pathway [GO:0007195]; angiogenesis [GO:0001525]; blood coagulation, intrinsic pathway [GO:0007597]; blood vessel remodeling [GO:0001974]; cell-cell junction organization [GO:0045216]; cerebral cortex development [GO:0021987]; cilium assembly [GO:0060271]; …	actin cytoskeleton [GO:0015629]; actin filament [GO:0005884]; actin filament bundle [GO:0032432]; apical dendrite [GO:0097440]; axonal growth cone [GO:0044295]; brush border [GO:0005903]; cell-cell junction [GO:0005911]; cortical cytoskeleton [GO:0030863]; cytoplasm [GO:0005737]; cytosol [GO:0005829]; dendritic shaft [GO:0043198]; glutamatergic synapse [GO:0098978]; glycoprotein Ib-IX-V complex […	actin binding [GO:0003779]; actin filament binding [GO:0051015]; DNA-binding transcription factor binding [GO:0140297]; Fc-gamma receptor I complex binding [GO:0034988]; G protein-coupled receptor binding [GO:0001664]; potassium channel regulator activity [GO:0015459]; protein homodimerization activity [GO:0042803]; protein kinase C binding [GO:0005080]; protein sequestering activity [GO:0140311]…	actin cytoskeleton [GO:0015629]; actin filament [GO:0005884]; actin filament bundle [GO:0032432]; apical dendrite [GO:0097440]; axonal growth cone [GO:0044295]; brush border [GO:0005903]; cell-cell junction [GO:0005911]; cortical cytoskeleton [GO:0030863]; cytoplasm [GO:0005737]; cytosol [GO:0005829]; dendritic shaft [GO:0043198]; glutamatergic synapse [GO:0098978]; glycoprotein Ib-IX-V complex […	GO:0001525; GO:0001664; GO:0001837; GO:0001974; GO:0002102; GO:0003007; GO:0003779; GO:0005080; GO:0005634; GO:0005730; GO:0005737; GO:0005802; GO:0005829; GO:0005884; GO:0005886; GO:0005903; GO:0005911; GO:0007195; GO:0007597; GO:0010572; GO:0010977; GO:0015459; GO:0015629; GO:0016479; GO:0021943; GO:0021987; GO:0030018; GO:0030036; GO:0030334; GO:0030426; GO:0030863; GO:0031267; GO:0031523; GO:…			cellular organisms (no rank), Eukaryota (superkingdom), Opisthokonta (clade), Metazoa (kingdom), Eumetazoa (clade), Bilateria (clade), Deuterostomia (clade), Chordata (phylum), Craniata (subphylum), Vertebrata (clade), Gnathostomata (clade), Teleostomi (clade), Euteleostomi (clade), Sarcopterygii (superclass), Dipnotetrapodomorpha (clade), Tetrapoda (clade), Amniota (clade), Mammalia (class), The…	131567 (no rank), 2759 (superkingdom), 33154 (clade), 33208 (kingdom), 6072 (clade), 33213 (clade), 33511 (clade), 7711 (phylum), 89593 (subphylum), 7742 (clade), 7776 (clade), 117570 (clade), 117571 (clade), 8287 (superclass), 1338369 (clade), 32523 (clade), 32524 (clade), 40674 (class), 32525 (clade), 9347 (clade), 1437010 (clade), 314146 (superorder), 314147 (clade), 9989 (order), 1963758 (sub…	PTM: Phosphorylation at Ser-2152 is negatively regulated by the autoinhibited conformation of filamin repeats 19-21. Ligand binding induces a conformational switch triggering phosphorylation at Ser-2152 by PKA. {ECO:0000250|UniProtKB:P21333}.; PTM: Polyubiquitination in the CH1 domain by a SCF-like complex containing ASB2 leads to proteasomal degradation. Prior dissociation from actin may be requ…	Q8CIH5	SUBUNIT: Homodimer. Interacts with FCGR1A, FLNB, FURIN, HSPB7, KCND2, INPPL1, MYOT, MYOZ1, PDLIM2, ARHGAP24, PSEN1, PSEN2 and ECSCR. Also interacts with various other binding partners in addition to filamentous actin. Interacts (via N-terminus) with TAF1B. Interacts (via N-terminus) with MIS18BP1 (via N-terminus) (By similarity). Interacts with TMEM67 (via C-terminus) and MKS1 (By similarity). In…
Q8BZ71	-0.799624	23.9261	-4.76171	0.00121429	0.0208496	-0.954381	reviewed	STAC3_MOUSE	SH3 and cysteine-rich domain-containing protein 3	Stac3	360	neuromuscular synaptic transmission [GO:0007274]; positive regulation of protein localization to plasma membrane [GO:1903078]; positive regulation of voltage-gated calcium channel activity [GO:1901387]; skeletal muscle contraction [GO:0003009]; skeletal muscle fiber development [GO:0048741]	cytoplasmic side of plasma membrane [GO:0009898]; cytosol [GO:0005829]; nucleoplasm [GO:0005654]; synapse [GO:0045202]; T-tubule [GO:0030315]; voltage-gated calcium channel complex [GO:0005891]	identical protein binding [GO:0042802]; zinc ion binding [GO:0008270]	cytoplasmic side of plasma membrane [GO:0009898]; cytosol [GO:0005829]; nucleoplasm [GO:0005654]; synapse [GO:0045202]; T-tubule [GO:0030315]; voltage-gated calcium channel complex [GO:0005891]; identical protein binding [GO:0042802]; zinc ion binding [GO:0008270]; neuromuscular synaptic transmission [GO:0007274]; positive regulation of protein localization to plasma membrane [GO:1903078]; positi…	GO:0003009; GO:0005654; GO:0005829; GO:0005891; GO:0007274; GO:0008270; GO:0009898; GO:0030315; GO:0042802; GO:0045202; GO:0048741; GO:1901387; GO:1903078			cellular organisms (no rank), Eukaryota (superkingdom), Opisthokonta (clade), Metazoa (kingdom), Eumetazoa (clade), Bilateria (clade), Deuterostomia (clade), Chordata (phylum), Craniata (subphylum), Vertebrata (clade), Gnathostomata (clade), Teleostomi (clade), Euteleostomi (clade), Sarcopterygii (superclass), Dipnotetrapodomorpha (clade), Tetrapoda (clade), Amniota (clade), Mammalia (class), The…	131567 (no rank), 2759 (superkingdom), 33154 (clade), 33208 (kingdom), 6072 (clade), 33213 (clade), 33511 (clade), 7711 (phylum), 89593 (subphylum), 7742 (clade), 7776 (clade), 117570 (clade), 117571 (clade), 8287 (superclass), 1338369 (clade), 32523 (clade), 32524 (clade), 40674 (class), 32525 (clade), 9347 (clade), 1437010 (clade), 314146 (superorder), 314147 (clade), 9989 (order), 1963758 (sub…			SUBUNIT: Interacts (via SH3 domains) with the calcium channels CACNA1S and CACNA1C (PubMed:28112192, PubMed:29363593, PubMed:29467163). Component of a calcium channel complex with CACNA1S and CACNB1 (PubMed:28112192). Component of a calcium channel complex with CACNA1C and CACNB1 (PubMed:28112192). {ECO:0000269|PubMed:28112192, ECO:0000269|PubMed:29363593, ECO:0000269|PubMed:29467163}.
Q8CDN6	1.29668	22.3575	4.51972	0.00168632	0.0234106	-1.29929	reviewed	TXNL1_MOUSE	Thioredoxin-like protein 1 (32 kDa thioredoxin-related protein)	Txnl1 Trp32 Txnl	289		cytoplasm [GO:0005737]; nucleus [GO:0005634]; proteasome complex [GO:0000502]		cytoplasm [GO:0005737]; nucleus [GO:0005634]; proteasome complex [GO:0000502]	GO:0000502; GO:0005634; GO:0005737			cellular organisms (no rank), Eukaryota (superkingdom), Opisthokonta (clade), Metazoa (kingdom), Eumetazoa (clade), Bilateria (clade), Deuterostomia (clade), Chordata (phylum), Craniata (subphylum), Vertebrata (clade), Gnathostomata (clade), Teleostomi (clade), Euteleostomi (clade), Sarcopterygii (superclass), Dipnotetrapodomorpha (clade), Tetrapoda (clade), Amniota (clade), Mammalia (class), The…	131567 (no rank), 2759 (superkingdom), 33154 (clade), 33208 (kingdom), 6072 (clade), 33213 (clade), 33511 (clade), 7711 (phylum), 89593 (subphylum), 7742 (clade), 7776 (clade), 117570 (clade), 117571 (clade), 8287 (superclass), 1338369 (clade), 32523 (clade), 32524 (clade), 40674 (class), 32525 (clade), 9347 (clade), 1437010 (clade), 314146 (superorder), 314147 (clade), 9989 (order), 1963758 (sub…			SUBUNIT: Component of the 19S regulatory cap of the 26S proteasome. Interacts with PSMD14/RPN11. Interacts with, and reduces EEF1A1 (By similarity). {ECO:0000250}.
Q8CI43	1.14662	24.1231	6.01788	0.00025237	0.00781228	0.698099	reviewed	MYL6B_MOUSE	Myosin light chain 6B (Smooth muscle and nonmuscle myosin light chain alkali 6B)	Myl6b	207	muscle contraction [GO:0006936]; muscle filament sliding [GO:0030049]; skeletal muscle tissue development [GO:0007519]	myosin complex [GO:0016459]; unconventional myosin complex [GO:0016461]	calcium ion binding [GO:0005509]; cytoskeletal motor activity [GO:0003774]; structural constituent of muscle [GO:0008307]	myosin complex [GO:0016459]; unconventional myosin complex [GO:0016461]; calcium ion binding [GO:0005509]; cytoskeletal motor activity [GO:0003774]; structural constituent of muscle [GO:0008307]; muscle contraction [GO:0006936]; muscle filament sliding [GO:0030049]; skeletal muscle tissue development [GO:0007519]	GO:0003774; GO:0005509; GO:0006936; GO:0007519; GO:0008307; GO:0016459; GO:0016461; GO:0030049			cellular organisms (no rank), Eukaryota (superkingdom), Opisthokonta (clade), Metazoa (kingdom), Eumetazoa (clade), Bilateria (clade), Deuterostomia (clade), Chordata (phylum), Craniata (subphylum), Vertebrata (clade), Gnathostomata (clade), Teleostomi (clade), Euteleostomi (clade), Sarcopterygii (superclass), Dipnotetrapodomorpha (clade), Tetrapoda (clade), Amniota (clade), Mammalia (class), The…	131567 (no rank), 2759 (superkingdom), 33154 (clade), 33208 (kingdom), 6072 (clade), 33213 (clade), 33511 (clade), 7711 (phylum), 89593 (subphylum), 7742 (clade), 7776 (clade), 117570 (clade), 117571 (clade), 8287 (superclass), 1338369 (clade), 32523 (clade), 32524 (clade), 40674 (class), 32525 (clade), 9347 (clade), 1437010 (clade), 314146 (superorder), 314147 (clade), 9989 (order), 1963758 (sub…			SUBUNIT: Myosin is a hexamer of 2 heavy chains and 4 light chains.
Q8CI51	0.700087	28.0743	5.46775	0.000488865	0.0116034	0.00271822	reviewed	PDLI5_MOUSE	PDZ and LIM domain protein 5 (Enigma homolog) (Enigma-like PDZ and LIM domains protein)	Pdlim5 Enh	591	regulation of dendritic spine morphogenesis [GO:0061001]; regulation of synapse assembly [GO:0051963]	cell projection [GO:0042995]; cytosol [GO:0005829]; postsynaptic density [GO:0014069]; presynapse [GO:0098793]; Z disc [GO:0030018]	metal ion binding [GO:0046872]	cell projection [GO:0042995]; cytosol [GO:0005829]; postsynaptic density [GO:0014069]; presynapse [GO:0098793]; Z disc [GO:0030018]; metal ion binding [GO:0046872]; regulation of dendritic spine morphogenesis [GO:0061001]; regulation of synapse assembly [GO:0051963]	GO:0005829; GO:0014069; GO:0030018; GO:0042995; GO:0046872; GO:0051963; GO:0061001; GO:0098793			cellular organisms (no rank), Eukaryota (superkingdom), Opisthokonta (clade), Metazoa (kingdom), Eumetazoa (clade), Bilateria (clade), Deuterostomia (clade), Chordata (phylum), Craniata (subphylum), Vertebrata (clade), Gnathostomata (clade), Teleostomi (clade), Euteleostomi (clade), Sarcopterygii (superclass), Dipnotetrapodomorpha (clade), Tetrapoda (clade), Amniota (clade), Mammalia (class), The…	131567 (no rank), 2759 (superkingdom), 33154 (clade), 33208 (kingdom), 6072 (clade), 33213 (clade), 33511 (clade), 7711 (phylum), 89593 (subphylum), 7742 (clade), 7776 (clade), 117570 (clade), 117571 (clade), 8287 (superclass), 1338369 (clade), 32523 (clade), 32524 (clade), 40674 (class), 32525 (clade), 9347 (clade), 1437010 (clade), 314146 (superorder), 314147 (clade), 9989 (order), 1963758 (sub…			SUBUNIT: Interacts with various PKC isoforms through the LIM domains. Interacts with actin and alpha-actinin through the PDZ domain. Interacts (via LIM domains) with SIPA1L1/SPAR; this interaction may occur preferentially with isoform 1. {ECO:0000250|UniProtKB:Q62920}.
Q8K0Z7	-1.21749	20.9168	-3.56595	0.00668137	0.0440583	-2.73642	reviewed	TACO1_MOUSE	Translational activator of cytochrome c oxidase 1 (Coiled-coil domain-containing protein 44) (Translational activator of mitochondrially-encoded cytochrome c oxidase 1)	Taco1 Ccdc44	294	mitochondrial cytochrome c oxidase assembly [GO:0033617]; motor learning [GO:0061743]; regulation of mitochondrial translation [GO:0070129]	mitochondrion [GO:0005739]	mitochondrial ribosome binding [GO:0097177]; mRNA binding [GO:0003729]; rRNA binding [GO:0019843]	mitochondrion [GO:0005739]; mitochondrial ribosome binding [GO:0097177]; mRNA binding [GO:0003729]; rRNA binding [GO:0019843]; mitochondrial cytochrome c oxidase assembly [GO:0033617]; motor learning [GO:0061743]; regulation of mitochondrial translation [GO:0070129]	GO:0003729; GO:0005739; GO:0019843; GO:0033617; GO:0061743; GO:0070129; GO:0097177			cellular organisms (no rank), Eukaryota (superkingdom), Opisthokonta (clade), Metazoa (kingdom), Eumetazoa (clade), Bilateria (clade), Deuterostomia (clade), Chordata (phylum), Craniata (subphylum), Vertebrata (clade), Gnathostomata (clade), Teleostomi (clade), Euteleostomi (clade), Sarcopterygii (superclass), Dipnotetrapodomorpha (clade), Tetrapoda (clade), Amniota (clade), Mammalia (class), The…	131567 (no rank), 2759 (superkingdom), 33154 (clade), 33208 (kingdom), 6072 (clade), 33213 (clade), 33511 (clade), 7711 (phylum), 89593 (subphylum), 7742 (clade), 7776 (clade), 117570 (clade), 117571 (clade), 8287 (superclass), 1338369 (clade), 32523 (clade), 32524 (clade), 40674 (class), 32525 (clade), 9347 (clade), 1437010 (clade), 314146 (superorder), 314147 (clade), 9989 (order), 1963758 (sub…
Q8K1Z0	-0.654758	24.0392	-3.98698	0.00358107	0.0348184	-2.08776	reviewed	COQ9_MOUSE	Ubiquinone biosynthesis protein COQ9, mitochondrial	Coq9	313	mitochondrial electron transport, NADH to ubiquinone [GO:0006120]; ubiquinone biosynthetic process [GO:0006744]	mitochondrial inner membrane [GO:0005743]; mitochondrion [GO:0005739]; ubiquinone biosynthesis complex [GO:0110142]	isoprenoid binding [GO:0019840]; lipid binding [GO:0008289]; protein homodimerization activity [GO:0042803]	mitochondrial inner membrane [GO:0005743]; mitochondrion [GO:0005739]; ubiquinone biosynthesis complex [GO:0110142]; isoprenoid binding [GO:0019840]; lipid binding [GO:0008289]; protein homodimerization activity [GO:0042803]; mitochondrial electron transport, NADH to ubiquinone [GO:0006120]; ubiquinone biosynthetic process [GO:0006744]	GO:0005739; GO:0005743; GO:0006120; GO:0006744; GO:0008289; GO:0019840; GO:0042803; GO:0110142		BINDING 239; /ligand=1,2-diacylglycero-3-phosphoethanolamine; /ligand_id=ChEBI:CHEBI:57613; /evidence=ECO:0000250|UniProtKB:O75208	cellular organisms (no rank), Eukaryota (superkingdom), Opisthokonta (clade), Metazoa (kingdom), Eumetazoa (clade), Bilateria (clade), Deuterostomia (clade), Chordata (phylum), Craniata (subphylum), Vertebrata (clade), Gnathostomata (clade), Teleostomi (clade), Euteleostomi (clade), Sarcopterygii (superclass), Dipnotetrapodomorpha (clade), Tetrapoda (clade), Amniota (clade), Mammalia (class), The…	131567 (no rank), 2759 (superkingdom), 33154 (clade), 33208 (kingdom), 6072 (clade), 33213 (clade), 33511 (clade), 7711 (phylum), 89593 (subphylum), 7742 (clade), 7776 (clade), 117570 (clade), 117571 (clade), 8287 (superclass), 1338369 (clade), 32523 (clade), 32524 (clade), 40674 (class), 32525 (clade), 9347 (clade), 1437010 (clade), 314146 (superorder), 314147 (clade), 9989 (order), 1963758 (sub…	PTM: In response to mitochondrial stress, the precursor protein is ubiquitinated by the SIFI complex in the cytoplasm before mitochondrial import, leading to its degradation. Within the SIFI complex, UBR4 initiates ubiquitin chain that are further elongated or branched by KCMF1. {ECO:0000250|UniProtKB:O75208}.		SUBUNIT: Homodimer. Heterodimer; two heterodimers of COQ7:COQ9 come together on the same side of the lipid pseudo-bilayer and form a curved tetramer with a hydrophobic surface suitable for membrane interaction. These two tetramers assemble into a soluble octamer with a pseudo-bilayer of lipids captured within. Interacts with COQ7; this interaction allows ubiquinone (CoQ) isoprene intermediates pr…
Q8K4L3	2.13322	19.4432	3.42285	0.00830287	0.0489368	-2.96113	reviewed	SVIL_MOUSE	Supervillin (Archvillin) (p205/p250)	Svil	2170	cytoskeleton organization [GO:0007010]; muscle cell differentiation [GO:0042692]; positive regulation of cytokinesis [GO:0032467]	cell periphery [GO:0071944]; cell projection [GO:0042995]; cleavage furrow [GO:0032154]; costamere [GO:0043034]; cytoplasm [GO:0005737]; focal adhesion [GO:0005925]; microtubule minus-end [GO:0036449]; midbody [GO:0030496]; nucleoplasm [GO:0005654]; podosome [GO:0002102]; sarcolemma [GO:0042383]	actin filament binding [GO:0051015]	cell periphery [GO:0071944]; cell projection [GO:0042995]; cleavage furrow [GO:0032154]; costamere [GO:0043034]; cytoplasm [GO:0005737]; focal adhesion [GO:0005925]; microtubule minus-end [GO:0036449]; midbody [GO:0030496]; nucleoplasm [GO:0005654]; podosome [GO:0002102]; sarcolemma [GO:0042383]; actin filament binding [GO:0051015]; cytoskeleton organization [GO:0007010]; muscle cell differentiat…	GO:0002102; GO:0005654; GO:0005737; GO:0005925; GO:0007010; GO:0030496; GO:0032154; GO:0032467; GO:0036449; GO:0042383; GO:0042692; GO:0042995; GO:0043034; GO:0051015; GO:0071944			cellular organisms (no rank), Eukaryota (superkingdom), Opisthokonta (clade), Metazoa (kingdom), Eumetazoa (clade), Bilateria (clade), Deuterostomia (clade), Chordata (phylum), Craniata (subphylum), Vertebrata (clade), Gnathostomata (clade), Teleostomi (clade), Euteleostomi (clade), Sarcopterygii (superclass), Dipnotetrapodomorpha (clade), Tetrapoda (clade), Amniota (clade), Mammalia (class), The…	131567 (no rank), 2759 (superkingdom), 33154 (clade), 33208 (kingdom), 6072 (clade), 33213 (clade), 33511 (clade), 7711 (phylum), 89593 (subphylum), 7742 (clade), 7776 (clade), 117570 (clade), 117571 (clade), 8287 (superclass), 1338369 (clade), 32523 (clade), 32524 (clade), 40674 (class), 32525 (clade), 9347 (clade), 1437010 (clade), 314146 (superorder), 314147 (clade), 9989 (order), 1963758 (sub…			SUBUNIT: Associates with F-actin (By similarity). Interacts with NEB (By similarity). Interacts with MYH9 (By similarity). Interacts with MYLK (By similarity). Interacts with TASOR (PubMed:31112734). {ECO:0000250|UniProtKB:O46385, ECO:0000269|PubMed:31112734}.; SUBUNIT: [Isoform 2]: Interacts with TRIP6 (By similarity). Interacts with DYNLT1 (By similarity). Interacts with KIF14; at midbody durin…
Q8QZS1	-0.579024	22.1605	-3.55645	0.00677793	0.0440583	-2.75129	reviewed	HIBCH_MOUSE	3-hydroxyisobutyryl-CoA hydrolase, mitochondrial (EC 3.1.2.4) (3-hydroxyisobutyryl-coenzyme A hydrolase) (HIB-CoA hydrolase) (HIBYL-CoA-H)	Hibch	385	valine catabolic process [GO:0006574]	mitochondrion [GO:0005739]	3-hydroxyisobutyryl-CoA hydrolase activity [GO:0003860]	mitochondrion [GO:0005739]; 3-hydroxyisobutyryl-CoA hydrolase activity [GO:0003860]; valine catabolic process [GO:0006574]	GO:0003860; GO:0005739; GO:0006574		BINDING 120; /ligand=substrate; /evidence=ECO:0000250; BINDING 145; /ligand=substrate; /evidence=ECO:0000250; BINDING 168; /ligand=substrate; /evidence=ECO:0000250; BINDING 176; /ligand=substrate; /evidence=ECO:0000250	cellular organisms (no rank), Eukaryota (superkingdom), Opisthokonta (clade), Metazoa (kingdom), Eumetazoa (clade), Bilateria (clade), Deuterostomia (clade), Chordata (phylum), Craniata (subphylum), Vertebrata (clade), Gnathostomata (clade), Teleostomi (clade), Euteleostomi (clade), Sarcopterygii (superclass), Dipnotetrapodomorpha (clade), Tetrapoda (clade), Amniota (clade), Mammalia (class), The…	131567 (no rank), 2759 (superkingdom), 33154 (clade), 33208 (kingdom), 6072 (clade), 33213 (clade), 33511 (clade), 7711 (phylum), 89593 (subphylum), 7742 (clade), 7776 (clade), 117570 (clade), 117571 (clade), 8287 (superclass), 1338369 (clade), 32523 (clade), 32524 (clade), 40674 (class), 32525 (clade), 9347 (clade), 1437010 (clade), 314146 (superorder), 314147 (clade), 9989 (order), 1963758 (sub…
Q8R1G2	-0.859315	23.6086	-3.92205	0.00393635	0.036481	-2.18644	reviewed	CMBL_MOUSE	Carboxymethylenebutenolidase homolog (EC 3.1.-.-)	Cmbl	245		cytosol [GO:0005829]	hydrolase activity [GO:0016787]	cytosol [GO:0005829]; hydrolase activity [GO:0016787]	GO:0005829; GO:0016787	ACT_SITE 132; /evidence=ECO:0000250; ACT_SITE 179; /evidence=ECO:0000250; ACT_SITE 212; /evidence=ECO:0000250		cellular organisms (no rank), Eukaryota (superkingdom), Opisthokonta (clade), Metazoa (kingdom), Eumetazoa (clade), Bilateria (clade), Deuterostomia (clade), Chordata (phylum), Craniata (subphylum), Vertebrata (clade), Gnathostomata (clade), Teleostomi (clade), Euteleostomi (clade), Sarcopterygii (superclass), Dipnotetrapodomorpha (clade), Tetrapoda (clade), Amniota (clade), Mammalia (class), The…	131567 (no rank), 2759 (superkingdom), 33154 (clade), 33208 (kingdom), 6072 (clade), 33213 (clade), 33511 (clade), 7711 (phylum), 89593 (subphylum), 7742 (clade), 7776 (clade), 117570 (clade), 117571 (clade), 8287 (superclass), 1338369 (clade), 32523 (clade), 32524 (clade), 40674 (class), 32525 (clade), 9347 (clade), 1437010 (clade), 314146 (superorder), 314147 (clade), 9989 (order), 1963758 (sub…
Q8R1I1	-1.2041	23.3031	-3.69452	0.00550876	0.0429382	-2.53624	reviewed	QCR9_MOUSE	Cytochrome b-c1 complex subunit 9 (Complex III subunit 9) (Complex III subunit X) (Cytochrome c1 non-heme 7 kDa protein) (Ubiquinol-cytochrome c reductase complex 7.2 kDa protein)	Uqcr10	64	cellular respiration [GO:0045333]; mitochondrial electron transport, ubiquinol to cytochrome c [GO:0006122]	mitochondrial inner membrane [GO:0005743]; mitochondrion [GO:0005739]; respiratory chain complex III [GO:0045275]		mitochondrial inner membrane [GO:0005743]; mitochondrion [GO:0005739]; respiratory chain complex III [GO:0045275]; cellular respiration [GO:0045333]; mitochondrial electron transport, ubiquinol to cytochrome c [GO:0006122]	GO:0005739; GO:0005743; GO:0006122; GO:0045275; GO:0045333			cellular organisms (no rank), Eukaryota (superkingdom), Opisthokonta (clade), Metazoa (kingdom), Eumetazoa (clade), Bilateria (clade), Deuterostomia (clade), Chordata (phylum), Craniata (subphylum), Vertebrata (clade), Gnathostomata (clade), Teleostomi (clade), Euteleostomi (clade), Sarcopterygii (superclass), Dipnotetrapodomorpha (clade), Tetrapoda (clade), Amniota (clade), Mammalia (class), The…	131567 (no rank), 2759 (superkingdom), 33154 (clade), 33208 (kingdom), 6072 (clade), 33213 (clade), 33511 (clade), 7711 (phylum), 89593 (subphylum), 7742 (clade), 7776 (clade), 117570 (clade), 117571 (clade), 8287 (superclass), 1338369 (clade), 32523 (clade), 32524 (clade), 40674 (class), 32525 (clade), 9347 (clade), 1437010 (clade), 314146 (superorder), 314147 (clade), 9989 (order), 1963758 (sub…			SUBUNIT: Component of the ubiquinol-cytochrome c oxidoreductase (cytochrome b-c1 complex, complex III, CIII), a multisubunit enzyme composed of 11 subunits (PubMed:34616041, PubMed:38575788). The complex is composed of 3 respiratory subunits cytochrome b, cytochrome c1 and Rieske protein UQCRFS1, 2 core protein subunits UQCRC1/QCR1 and UQCRC2/QCR2, and 6 low-molecular weight protein subunits UQCR…
Q8VDM4	0.975928	22.7783	3.59068	0.0064368	0.0440583	-2.69778	reviewed	PSMD2_MOUSE	26S proteasome non-ATPase regulatory subunit 2 (26S proteasome regulatory subunit RPN1) (26S proteasome regulatory subunit S2) (26S proteasome subunit p97)	Psmd2	908	regulation of protein catabolic process [GO:0042176]	proteasome accessory complex [GO:0022624]; proteasome complex [GO:0000502]; proteasome regulatory particle [GO:0005838]	enzyme regulator activity [GO:0030234]	proteasome accessory complex [GO:0022624]; proteasome complex [GO:0000502]; proteasome regulatory particle [GO:0005838]; enzyme regulator activity [GO:0030234]; regulation of protein catabolic process [GO:0042176]	GO:0000502; GO:0005838; GO:0022624; GO:0030234; GO:0042176			cellular organisms (no rank), Eukaryota (superkingdom), Opisthokonta (clade), Metazoa (kingdom), Eumetazoa (clade), Bilateria (clade), Deuterostomia (clade), Chordata (phylum), Craniata (subphylum), Vertebrata (clade), Gnathostomata (clade), Teleostomi (clade), Euteleostomi (clade), Sarcopterygii (superclass), Dipnotetrapodomorpha (clade), Tetrapoda (clade), Amniota (clade), Mammalia (class), The…	131567 (no rank), 2759 (superkingdom), 33154 (clade), 33208 (kingdom), 6072 (clade), 33213 (clade), 33511 (clade), 7711 (phylum), 89593 (subphylum), 7742 (clade), 7776 (clade), 117570 (clade), 117571 (clade), 8287 (superclass), 1338369 (clade), 32523 (clade), 32524 (clade), 40674 (class), 32525 (clade), 9347 (clade), 1437010 (clade), 314146 (superorder), 314147 (clade), 9989 (order), 1963758 (sub…			SUBUNIT: Component of the 19S proteasome regulatory particle complex. The 26S proteasome consists of a 20S core particle (CP) and two 19S regulatory subunits (RP). The regulatory particle is made of a lid composed of 9 subunits, a base containing 6 ATPases and few additional components including PSMD2 (By similarity). Interacts with RPGRIP1L (PubMed:26150391). Interacts with CRY1 in a KDM8-depend…
Q8VEE1	1.40869	25.8127	7.56944	4.77107e-05	0.00296173	2.44061	reviewed	LMCD1_MOUSE	LIM and cysteine-rich domains protein 1	Lmcd1	365	negative regulation of transcription by RNA polymerase II [GO:0000122]; positive regulation of calcineurin-NFAT signaling cascade [GO:0070886]; regulation of cardiac muscle hypertrophy [GO:0010611]	cytoplasm [GO:0005737]; nucleus [GO:0005634]	transcription corepressor activity [GO:0003714]; zinc ion binding [GO:0008270]	cytoplasm [GO:0005737]; nucleus [GO:0005634]; transcription corepressor activity [GO:0003714]; zinc ion binding [GO:0008270]; negative regulation of transcription by RNA polymerase II [GO:0000122]; positive regulation of calcineurin-NFAT signaling cascade [GO:0070886]; regulation of cardiac muscle hypertrophy [GO:0010611]	GO:0000122; GO:0003714; GO:0005634; GO:0005737; GO:0008270; GO:0010611; GO:0070886			cellular organisms (no rank), Eukaryota (superkingdom), Opisthokonta (clade), Metazoa (kingdom), Eumetazoa (clade), Bilateria (clade), Deuterostomia (clade), Chordata (phylum), Craniata (subphylum), Vertebrata (clade), Gnathostomata (clade), Teleostomi (clade), Euteleostomi (clade), Sarcopterygii (superclass), Dipnotetrapodomorpha (clade), Tetrapoda (clade), Amniota (clade), Mammalia (class), The…	131567 (no rank), 2759 (superkingdom), 33154 (clade), 33208 (kingdom), 6072 (clade), 33213 (clade), 33511 (clade), 7711 (phylum), 89593 (subphylum), 7742 (clade), 7776 (clade), 117570 (clade), 117571 (clade), 8287 (superclass), 1338369 (clade), 32523 (clade), 32524 (clade), 40674 (class), 32525 (clade), 9347 (clade), 1437010 (clade), 314146 (superorder), 314147 (clade), 9989 (order), 1963758 (sub…			SUBUNIT: Interacts with beta-dystroglycan (By similarity). Interacts with GATA1, GATA4 and GATA6. {ECO:0000250, ECO:0000269|PubMed:16199866}.
Q8VHX6	1.38037	30.0319	6.70261	0.000116951	0.00472913	1.50501	reviewed	FLNC_MOUSE	Filamin-C (FLN-C) (ABP-280-like protein) (ABP-L) (Actin-binding-like protein) (Filamin-2) (Gamma-filamin)	Flnc Abpl Fln2	2726	actin filament-based process [GO:0030029]; muscle cell development [GO:0055001]; sarcomere organization [GO:0045214]	actin cytoskeleton [GO:0015629]; cytosol [GO:0005829]; intercellular bridge [GO:0045171]; sarcolemma [GO:0042383]; sarcoplasm [GO:0016528]; Z disc [GO:0030018]	actin binding [GO:0003779]; actin filament binding [GO:0051015]; ankyrin binding [GO:0030506]	actin cytoskeleton [GO:0015629]; cytosol [GO:0005829]; intercellular bridge [GO:0045171]; sarcolemma [GO:0042383]; sarcoplasm [GO:0016528]; Z disc [GO:0030018]; actin binding [GO:0003779]; actin filament binding [GO:0051015]; ankyrin binding [GO:0030506]; actin filament-based process [GO:0030029]; muscle cell development [GO:0055001]; sarcomere organization [GO:0045214]	GO:0003779; GO:0005829; GO:0015629; GO:0016528; GO:0030018; GO:0030029; GO:0030506; GO:0042383; GO:0045171; GO:0045214; GO:0051015; GO:0055001			cellular organisms (no rank), Eukaryota (superkingdom), Opisthokonta (clade), Metazoa (kingdom), Eumetazoa (clade), Bilateria (clade), Deuterostomia (clade), Chordata (phylum), Craniata (subphylum), Vertebrata (clade), Gnathostomata (clade), Teleostomi (clade), Euteleostomi (clade), Sarcopterygii (superclass), Dipnotetrapodomorpha (clade), Tetrapoda (clade), Amniota (clade), Mammalia (class), The…	131567 (no rank), 2759 (superkingdom), 33154 (clade), 33208 (kingdom), 6072 (clade), 33213 (clade), 33511 (clade), 7711 (phylum), 89593 (subphylum), 7742 (clade), 7776 (clade), 117570 (clade), 117571 (clade), 8287 (superclass), 1338369 (clade), 32523 (clade), 32524 (clade), 40674 (class), 32525 (clade), 9347 (clade), 1437010 (clade), 314146 (superorder), 314147 (clade), 9989 (order), 1963758 (sub…	PTM: Ubiquitinated by FBXL22, leading to proteasomal degradation. {ECO:0000250}.		SUBUNIT: Homodimer; the filamin repeat 24 and the second hinge domain are important for dimer formation (By similarity). Interacts with FLNB, INPPL1, ITGB1A, KCND2, MYOT, MYOZ1 and MYOZ3. Interacts with sarcoglycans SGCD and SGCG. Interacts (via filament repeats 17-18, 20-21 and 24) with USP25 (isoform USP25m only). Interacts with FBLIM1 (By similarity). Interacts with XIRP1; this interaction is …
Q91VM9	-0.747524	19.9229	-3.63161	0.0060526	0.0439451	-2.63397	reviewed	IPYR2_MOUSE	Inorganic pyrophosphatase 2, mitochondrial (EC 3.6.1.1) (Pyrophosphate phospho-hydrolase 2) (PPase 2)	Ppa2	330	diphosphate metabolic process [GO:0071344]; phosphate-containing compound metabolic process [GO:0006796]; regulation of mitochondrial membrane potential [GO:0051881]	mitochondrion [GO:0005739]; synapse [GO:0045202]	inorganic diphosphate phosphatase activity [GO:0004427]; magnesium ion binding [GO:0000287]; protein serine/threonine phosphatase activity [GO:0004722]	mitochondrion [GO:0005739]; synapse [GO:0045202]; inorganic diphosphate phosphatase activity [GO:0004427]; magnesium ion binding [GO:0000287]; protein serine/threonine phosphatase activity [GO:0004722]; diphosphate metabolic process [GO:0071344]; phosphate-containing compound metabolic process [GO:0006796]; regulation of mitochondrial membrane potential [GO:0051881]	GO:0000287; GO:0004427; GO:0004722; GO:0005739; GO:0006796; GO:0045202; GO:0051881; GO:0071344		BINDING 159; /ligand=Mg(2+); /ligand_id=ChEBI:CHEBI:18420; /ligand_label=1; /evidence=ECO:0000250; BINDING 164; /ligand=Mg(2+); /ligand_id=ChEBI:CHEBI:18420; /ligand_label=1; /evidence=ECO:0000250; BINDING 164; /ligand=Mg(2+); /ligand_id=ChEBI:CHEBI:18420; /ligand_label=2; /evidence=ECO:0000250; BINDING 196; /ligand=Mg(2+); /ligand_id=ChEBI:CHEBI:18420; /ligand_label=1; /evidence=ECO:0000250	cellular organisms (no rank), Eukaryota (superkingdom), Opisthokonta (clade), Metazoa (kingdom), Eumetazoa (clade), Bilateria (clade), Deuterostomia (clade), Chordata (phylum), Craniata (subphylum), Vertebrata (clade), Gnathostomata (clade), Teleostomi (clade), Euteleostomi (clade), Sarcopterygii (superclass), Dipnotetrapodomorpha (clade), Tetrapoda (clade), Amniota (clade), Mammalia (class), The…	131567 (no rank), 2759 (superkingdom), 33154 (clade), 33208 (kingdom), 6072 (clade), 33213 (clade), 33511 (clade), 7711 (phylum), 89593 (subphylum), 7742 (clade), 7776 (clade), 117570 (clade), 117571 (clade), 8287 (superclass), 1338369 (clade), 32523 (clade), 32524 (clade), 40674 (class), 32525 (clade), 9347 (clade), 1437010 (clade), 314146 (superorder), 314147 (clade), 9989 (order), 1963758 (sub…			SUBUNIT: Homodimer. {ECO:0000250}.
Q91VR2	-0.533731	26.4504	-3.61475	0.00620786	0.0439451	-2.66024	reviewed	ATPG_MOUSE	ATP synthase F(1) complex subunit gamma, mitochondrial (ATP synthase F1 subunit gamma) (F-ATPase gamma subunit)	Atp5f1c Atp5c1	298	proton motive force-driven mitochondrial ATP synthesis [GO:0042776]	mitochondrial inner membrane [GO:0005743]; mitochondrion [GO:0005739]; myelin sheath [GO:0043209]; proton-transporting ATP synthase complex [GO:0045259]; proton-transporting ATP synthase complex, catalytic core F(1) [GO:0045261]	proton-transporting ATP synthase activity, rotational mechanism [GO:0046933]	mitochondrial inner membrane [GO:0005743]; mitochondrion [GO:0005739]; myelin sheath [GO:0043209]; proton-transporting ATP synthase complex [GO:0045259]; proton-transporting ATP synthase complex, catalytic core F(1) [GO:0045261]; proton-transporting ATP synthase activity, rotational mechanism [GO:0046933]; proton motive force-driven mitochondrial ATP synthesis [GO:0042776]	GO:0005739; GO:0005743; GO:0042776; GO:0043209; GO:0045259; GO:0045261; GO:0046933			cellular organisms (no rank), Eukaryota (superkingdom), Opisthokonta (clade), Metazoa (kingdom), Eumetazoa (clade), Bilateria (clade), Deuterostomia (clade), Chordata (phylum), Craniata (subphylum), Vertebrata (clade), Gnathostomata (clade), Teleostomi (clade), Euteleostomi (clade), Sarcopterygii (superclass), Dipnotetrapodomorpha (clade), Tetrapoda (clade), Amniota (clade), Mammalia (class), The…	131567 (no rank), 2759 (superkingdom), 33154 (clade), 33208 (kingdom), 6072 (clade), 33213 (clade), 33511 (clade), 7711 (phylum), 89593 (subphylum), 7742 (clade), 7776 (clade), 117570 (clade), 117571 (clade), 8287 (superclass), 1338369 (clade), 32523 (clade), 32524 (clade), 40674 (class), 32525 (clade), 9347 (clade), 1437010 (clade), 314146 (superorder), 314147 (clade), 9989 (order), 1963758 (sub…			SUBUNIT: Component of the ATP synthase complex composed at least of ATP5F1A/subunit alpha, ATP5F1B/subunit beta, ATP5MC1/subunit c (homooctomer), MT-ATP6/subunit a, MT-ATP8/subunit 8, ATP5ME/subunit e, ATP5MF/subunit f, ATP5MG/subunit g, ATP5MK/subunit k, ATP5MJ/subunit j, ATP5F1C/subunit gamma, ATP5F1D/subunit delta, ATP5F1E/subunit epsilon, ATP5PF/subunit F6, ATP5PB/subunit b, ATP5PD/subunit d,…
Q91Z83	1.17812	28.0378	3.46984	0.00772893	0.0476126	-2.88713	reviewed	MYH7_MOUSE	Myosin-7 (Myosin heavy chain 7) (Myosin heavy chain slow isoform) (MyHC-slow) (Myosin heavy chain, cardiac muscle beta isoform) (MyHC-beta)	Myh7	1935	adult heart development [GO:0007512]; ATP metabolic process [GO:0046034]; cardiac muscle contraction [GO:0060048]; cardiac muscle hypertrophy in response to stress [GO:0014898]; muscle filament sliding [GO:0030049]; regulation of heart rate [GO:0002027]; regulation of slow-twitch skeletal muscle fiber contraction [GO:0031449]; regulation of the force of heart contraction [GO:0002026]; regulation …	cytoplasm [GO:0005737]; myofibril [GO:0030016]; myosin complex [GO:0016459]; myosin filament [GO:0032982]; sarcomere [GO:0030017]; stress fiber [GO:0001725]; Z disc [GO:0030018]	actin filament binding [GO:0051015]; ATP binding [GO:0005524]; calmodulin binding [GO:0005516]; microfilament motor activity [GO:0000146]	cytoplasm [GO:0005737]; myofibril [GO:0030016]; myosin complex [GO:0016459]; myosin filament [GO:0032982]; sarcomere [GO:0030017]; stress fiber [GO:0001725]; Z disc [GO:0030018]; actin filament binding [GO:0051015]; ATP binding [GO:0005524]; calmodulin binding [GO:0005516]; microfilament motor activity [GO:0000146]; adult heart development [GO:0007512]; ATP metabolic process [GO:0046034]; cardiac…	GO:0000146; GO:0001725; GO:0002026; GO:0002027; GO:0003009; GO:0005516; GO:0005524; GO:0005737; GO:0007512; GO:0014728; GO:0014883; GO:0014898; GO:0016459; GO:0030016; GO:0030017; GO:0030018; GO:0030049; GO:0031449; GO:0032982; GO:0046034; GO:0051015; GO:0055010; GO:0060048		BINDING 178..185; /ligand=ATP; /ligand_id=ChEBI:CHEBI:30616	cellular organisms (no rank), Eukaryota (superkingdom), Opisthokonta (clade), Metazoa (kingdom), Eumetazoa (clade), Bilateria (clade), Deuterostomia (clade), Chordata (phylum), Craniata (subphylum), Vertebrata (clade), Gnathostomata (clade), Teleostomi (clade), Euteleostomi (clade), Sarcopterygii (superclass), Dipnotetrapodomorpha (clade), Tetrapoda (clade), Amniota (clade), Mammalia (class), The…	131567 (no rank), 2759 (superkingdom), 33154 (clade), 33208 (kingdom), 6072 (clade), 33213 (clade), 33511 (clade), 7711 (phylum), 89593 (subphylum), 7742 (clade), 7776 (clade), 117570 (clade), 117571 (clade), 8287 (superclass), 1338369 (clade), 32523 (clade), 32524 (clade), 40674 (class), 32525 (clade), 9347 (clade), 1437010 (clade), 314146 (superorder), 314147 (clade), 9989 (order), 1963758 (sub…			SUBUNIT: Muscle myosin is a hexameric protein that consists of 2 heavy chain subunits (MHC), 2 alkali light chain subunits (MLC) and 2 regulatory light chain subunits (MLC-2). Interacts with ECPAS. Interacts (via C-terminus) with LRRC39. {ECO:0000250|UniProtKB:P12883}.
Q922J3	0.647336	23.047	4.66846	0.0013767	0.0213653	-1.08628	reviewed	CLIP1_MOUSE	CAP-Gly domain-containing linker protein 1 (Cytoplasmic linker protein 170) (CLIP-170) (Restin)	Clip1 Kiaa4046 Rsn	1391	microtubule bundle formation [GO:0001578]; positive regulation of microtubule polymerization [GO:0031116]; protein transport into plasma membrane raft [GO:0044861]	cytoplasmic vesicle membrane [GO:0030659]; microtubule [GO:0005874]; microtubule cytoskeleton [GO:0015630]; microtubule plus-end [GO:0035371]; nuclear envelope [GO:0005635]; ruffle [GO:0001726]	microtubule binding [GO:0008017]; microtubule plus-end binding [GO:0051010]; tubulin binding [GO:0015631]; zinc ion binding [GO:0008270]	cytoplasmic vesicle membrane [GO:0030659]; microtubule [GO:0005874]; microtubule cytoskeleton [GO:0015630]; microtubule plus-end [GO:0035371]; nuclear envelope [GO:0005635]; ruffle [GO:0001726]; microtubule binding [GO:0008017]; microtubule plus-end binding [GO:0051010]; tubulin binding [GO:0015631]; zinc ion binding [GO:0008270]; microtubule bundle formation [GO:0001578]; positive regulation of …	GO:0001578; GO:0001726; GO:0005635; GO:0005874; GO:0008017; GO:0008270; GO:0015630; GO:0015631; GO:0030659; GO:0031116; GO:0035371; GO:0044861; GO:0051010			cellular organisms (no rank), Eukaryota (superkingdom), Opisthokonta (clade), Metazoa (kingdom), Eumetazoa (clade), Bilateria (clade), Deuterostomia (clade), Chordata (phylum), Craniata (subphylum), Vertebrata (clade), Gnathostomata (clade), Teleostomi (clade), Euteleostomi (clade), Sarcopterygii (superclass), Dipnotetrapodomorpha (clade), Tetrapoda (clade), Amniota (clade), Mammalia (class), The…	131567 (no rank), 2759 (superkingdom), 33154 (clade), 33208 (kingdom), 6072 (clade), 33213 (clade), 33511 (clade), 7711 (phylum), 89593 (subphylum), 7742 (clade), 7776 (clade), 117570 (clade), 117571 (clade), 8287 (superclass), 1338369 (clade), 32523 (clade), 32524 (clade), 40674 (class), 32525 (clade), 9347 (clade), 1437010 (clade), 314146 (superorder), 314147 (clade), 9989 (order), 1963758 (sub…	PTM: Phosphorylated (PubMed:26972003). Phosphorylation induces conformational changes by increasing the affinity of the N-terminus for C-terminus, resulting in inhibition of its function thus decreasing its binding to microtubules and DCTN1. Exhibits a folded, autoinhibited conformation when phosphorylated and an open conformation when dephosphorylated with increased binding affinity to microtubu…		SUBUNIT: Interacts with MTOR; phosphorylates and regulates CLIP1. Interacts (via CAP-Gly domains) with tubulin. Interacts with SLAIN2. Interacts with TUBA1B, MAPRE1 and MAPRE3. Interacts (via zinc finger) with DCTN1 (By similarity). Binds preferentially to tyrosinated microtubules, and only marginally to detyrosinated microtubules (PubMed:16954346). {ECO:0000250|UniProtKB:P30622, ECO:0000269|PubM…
Q99JB8	0.818025	23.9686	5.25062	0.000641851	0.0139993	-0.283791	reviewed	PACN3_MOUSE	Protein kinase C and casein kinase II substrate protein 3	Pacsin3	424	endocytosis [GO:0006897]; negative regulation of calcium ion transport [GO:0051926]; negative regulation of endocytosis [GO:0045806]; plasma membrane tubulation [GO:0097320]; positive regulation of membrane protein ectodomain proteolysis [GO:0051044]	cytoplasm [GO:0005737]; cytosol [GO:0005829]; plasma membrane [GO:0005886]	calcium channel inhibitor activity [GO:0019855]; cytoskeletal protein binding [GO:0008092]; identical protein binding [GO:0042802]; lipid binding [GO:0008289]	cytoplasm [GO:0005737]; cytosol [GO:0005829]; plasma membrane [GO:0005886]; calcium channel inhibitor activity [GO:0019855]; cytoskeletal protein binding [GO:0008092]; identical protein binding [GO:0042802]; lipid binding [GO:0008289]; endocytosis [GO:0006897]; negative regulation of calcium ion transport [GO:0051926]; negative regulation of endocytosis [GO:0045806]; plasma membrane tubulation [G…	GO:0005737; GO:0005829; GO:0005886; GO:0006897; GO:0008092; GO:0008289; GO:0019855; GO:0042802; GO:0045806; GO:0051044; GO:0051926; GO:0097320			cellular organisms (no rank), Eukaryota (superkingdom), Opisthokonta (clade), Metazoa (kingdom), Eumetazoa (clade), Bilateria (clade), Deuterostomia (clade), Chordata (phylum), Craniata (subphylum), Vertebrata (clade), Gnathostomata (clade), Teleostomi (clade), Euteleostomi (clade), Sarcopterygii (superclass), Dipnotetrapodomorpha (clade), Tetrapoda (clade), Amniota (clade), Mammalia (class), The…	131567 (no rank), 2759 (superkingdom), 33154 (clade), 33208 (kingdom), 6072 (clade), 33213 (clade), 33511 (clade), 7711 (phylum), 89593 (subphylum), 7742 (clade), 7776 (clade), 117570 (clade), 117571 (clade), 8287 (superclass), 1338369 (clade), 32523 (clade), 32524 (clade), 40674 (class), 32525 (clade), 9347 (clade), 1437010 (clade), 314146 (superorder), 314147 (clade), 9989 (order), 1963758 (sub…	PTM: Phosphorylated by casein kinase 2 (CK2) and protein kinase C (PKC).		SUBUNIT: Homodimer. May form heterooligomers with other PACSINs. Interacts (via SH3 domain) with DNM1, SYNJ1 and WASL. Interacts with TRPV4. {ECO:0000269|PubMed:11082044, ECO:0000269|PubMed:16627472, ECO:0000269|PubMed:18174177, ECO:0000269|PubMed:22573331}.
Q99JI4	1.42179	21.3256	3.82411	0.00454507	0.0398681	-2.33626	reviewed	PSMD6_MOUSE	26S proteasome non-ATPase regulatory subunit 6 (26S proteasome regulatory subunit RPN7) (26S proteasome regulatory subunit S10) (p42A)	Psmd6	389		proteasome accessory complex [GO:0022624]		proteasome accessory complex [GO:0022624]	GO:0022624			cellular organisms (no rank), Eukaryota (superkingdom), Opisthokonta (clade), Metazoa (kingdom), Eumetazoa (clade), Bilateria (clade), Deuterostomia (clade), Chordata (phylum), Craniata (subphylum), Vertebrata (clade), Gnathostomata (clade), Teleostomi (clade), Euteleostomi (clade), Sarcopterygii (superclass), Dipnotetrapodomorpha (clade), Tetrapoda (clade), Amniota (clade), Mammalia (class), The…	131567 (no rank), 2759 (superkingdom), 33154 (clade), 33208 (kingdom), 6072 (clade), 33213 (clade), 33511 (clade), 7711 (phylum), 89593 (subphylum), 7742 (clade), 7776 (clade), 117570 (clade), 117571 (clade), 8287 (superclass), 1338369 (clade), 32523 (clade), 32524 (clade), 40674 (class), 32525 (clade), 9347 (clade), 1437010 (clade), 314146 (superorder), 314147 (clade), 9989 (order), 1963758 (sub…			SUBUNIT: Component of the 19S proteasome regulatory particle complex. The 26S proteasome consists of a 20S core particle (CP) and two 19S regulatory subunits (RP). The regulatory particle is made of a lid composed of 9 subunits including PSMD6, a base containing 6 ATPases and few additional components. {ECO:0000250|UniProtKB:Q15008, ECO:0000269|PubMed:16857966}.
Q99JY9	0.675485	21.2852	3.548	0.00686502	0.0440583	-2.76451	reviewed	ARP3_MOUSE	Actin-related protein 3 (Actin-like protein 3)	Actr3 Arp3	418	Arp2/3 complex-mediated actin nucleation [GO:0034314]; asymmetric cell division [GO:0008356]; cellular response to type II interferon [GO:0071346]; cilium assembly [GO:0060271]; establishment or maintenance of cell polarity [GO:0007163]; meiotic cell cycle [GO:0051321]; meiotic chromosome movement towards spindle pole [GO:0016344]; meiotic cytokinesis [GO:0033206]; positive regulation of lamellip…	Arp2/3 protein complex [GO:0005885]; brush border [GO:0005903]; cell-cell junction [GO:0005911]; cytoplasm [GO:0005737]; lamellipodium [GO:0030027]; nucleus [GO:0005634]; site of double-strand break [GO:0035861]	actin filament binding [GO:0051015]; ATP binding [GO:0005524]; structural constituent of cytoskeleton [GO:0005200]	Arp2/3 protein complex [GO:0005885]; brush border [GO:0005903]; cell-cell junction [GO:0005911]; cytoplasm [GO:0005737]; lamellipodium [GO:0030027]; nucleus [GO:0005634]; site of double-strand break [GO:0035861]; actin filament binding [GO:0051015]; ATP binding [GO:0005524]; structural constituent of cytoskeleton [GO:0005200]; Arp2/3 complex-mediated actin nucleation [GO:0034314]; asymmetric cell…	GO:0005200; GO:0005524; GO:0005634; GO:0005737; GO:0005885; GO:0005903; GO:0005911; GO:0007163; GO:0008356; GO:0010592; GO:0016344; GO:0030027; GO:0033206; GO:0034314; GO:0035861; GO:0045944; GO:0051015; GO:0051321; GO:0051653; GO:0060271; GO:0071346			cellular organisms (no rank), Eukaryota (superkingdom), Opisthokonta (clade), Metazoa (kingdom), Eumetazoa (clade), Bilateria (clade), Deuterostomia (clade), Chordata (phylum), Craniata (subphylum), Vertebrata (clade), Gnathostomata (clade), Teleostomi (clade), Euteleostomi (clade), Sarcopterygii (superclass), Dipnotetrapodomorpha (clade), Tetrapoda (clade), Amniota (clade), Mammalia (class), The…	131567 (no rank), 2759 (superkingdom), 33154 (clade), 33208 (kingdom), 6072 (clade), 33213 (clade), 33511 (clade), 7711 (phylum), 89593 (subphylum), 7742 (clade), 7776 (clade), 117570 (clade), 117571 (clade), 8287 (superclass), 1338369 (clade), 32523 (clade), 32524 (clade), 40674 (class), 32525 (clade), 9347 (clade), 1437010 (clade), 314146 (superorder), 314147 (clade), 9989 (order), 1963758 (sub…		Q60598	SUBUNIT: Component of the Arp2/3 complex composed of ACTR2/ARP2, ACTR3/ARP3, ARPC1B/p41-ARC, ARPC2/p34-ARC, ARPC3/p21-ARC, ARPC4/p20-ARC and ARPC5/p16-ARC. Interacts with WHDC1. Interacts weakly with MEFV. Interacts with AVIL. {ECO:0000250|UniProtKB:P61158}.; SUBUNIT: (Microbial infection) Interacts with bacterium B.thailandensis BimA. {ECO:0000269|PubMed:20693329}.
Q99MR9	-0.659023	22.0885	-3.8724	0.00423329	0.0379585	-2.26225	reviewed	PPR3A_MOUSE	Protein phosphatase 1 regulatory subunit 3A (Protein phosphatase 1 glycogen-associated regulatory subunit) (Protein phosphatase type-1 glycogen targeting subunit) (RG1)	Ppp1r3a Pp1g	1089	glycogen metabolic process [GO:0005977]	membrane [GO:0016020]	protein serine/threonine phosphatase activity [GO:0004722]	membrane [GO:0016020]; protein serine/threonine phosphatase activity [GO:0004722]; glycogen metabolic process [GO:0005977]	GO:0004722; GO:0005977; GO:0016020			cellular organisms (no rank), Eukaryota (superkingdom), Opisthokonta (clade), Metazoa (kingdom), Eumetazoa (clade), Bilateria (clade), Deuterostomia (clade), Chordata (phylum), Craniata (subphylum), Vertebrata (clade), Gnathostomata (clade), Teleostomi (clade), Euteleostomi (clade), Sarcopterygii (superclass), Dipnotetrapodomorpha (clade), Tetrapoda (clade), Amniota (clade), Mammalia (class), The…	131567 (no rank), 2759 (superkingdom), 33154 (clade), 33208 (kingdom), 6072 (clade), 33213 (clade), 33511 (clade), 7711 (phylum), 89593 (subphylum), 7742 (clade), 7776 (clade), 117570 (clade), 117571 (clade), 8287 (superclass), 1338369 (clade), 32523 (clade), 32524 (clade), 40674 (class), 32525 (clade), 9347 (clade), 1437010 (clade), 314146 (superorder), 314147 (clade), 9989 (order), 1963758 (sub…	PTM: Phosphorylation at Ser-48 by ISPK stimulates the dephosphorylation of glycogen synthase and phosphorylase kinase. {ECO:0000250}.		SUBUNIT: Interacts with PPP1CC catalytic subunit of PP1, and associates with glycogen. {ECO:0000250}.
Q9CQC9	-1.14753	22.2359	-4.05636	0.00323898	0.0339118	-1.98291	reviewed	SAR1B_MOUSE	Small COPII coat GTPase SAR1B (EC 3.6.5.2)	Sar1b Sara1b Sara2	198	cellular response to leucine starvation [GO:1990253]; COPII vesicle coating [GO:0048208]; COPII-coated vesicle cargo loading [GO:0090110]; endoplasmic reticulum to Golgi vesicle-mediated transport [GO:0006888]; intracellular protein transport [GO:0006886]; lipid export from cell [GO:0140353]; lipid homeostasis [GO:0055088]; lipoprotein transport [GO:0042953]; negative regulation of TORC1 signalin…	COPII vesicle coat [GO:0030127]; cytosol [GO:0005829]; endoplasmic reticulum exit site [GO:0070971]; endoplasmic reticulum membrane [GO:0005789]; Golgi cisterna membrane [GO:0032580]; lysosomal membrane [GO:0005765]	amino acid sensor activity [GO:0140785]; G protein activity [GO:0003925]; GTP binding [GO:0005525]; metal ion binding [GO:0046872]	COPII vesicle coat [GO:0030127]; cytosol [GO:0005829]; endoplasmic reticulum exit site [GO:0070971]; endoplasmic reticulum membrane [GO:0005789]; Golgi cisterna membrane [GO:0032580]; lysosomal membrane [GO:0005765]; amino acid sensor activity [GO:0140785]; G protein activity [GO:0003925]; GTP binding [GO:0005525]; metal ion binding [GO:0046872]; cellular response to leucine starvation [GO:199025…	GO:0003925; GO:0005525; GO:0005765; GO:0005789; GO:0005829; GO:0006886; GO:0006888; GO:0030127; GO:0032368; GO:0032580; GO:0042953; GO:0046872; GO:0048208; GO:0055088; GO:0070971; GO:0090110; GO:0140353; GO:0140785; GO:1904262; GO:1990253		BINDING 34; /ligand=Mg(2+); /ligand_id=ChEBI:CHEBI:18420; /evidence=ECO:0000250|UniProtKB:Q9Y6B6; BINDING 35; /ligand=GDP; /ligand_id=ChEBI:CHEBI:58189; /evidence=ECO:0000250|UniProtKB:Q9Y6B6; BINDING 35; /ligand=GTP; /ligand_id=ChEBI:CHEBI:37565; /evidence=ECO:0000250|UniProtKB:Q9Y6B6; BINDING 36; /ligand=GDP; /ligand_id=ChEBI:CHEBI:58189; /evidence=ECO:0000250|UniProtKB:Q9Y6B6; BINDING 37; /lig…	cellular organisms (no rank), Eukaryota (superkingdom), Opisthokonta (clade), Metazoa (kingdom), Eumetazoa (clade), Bilateria (clade), Deuterostomia (clade), Chordata (phylum), Craniata (subphylum), Vertebrata (clade), Gnathostomata (clade), Teleostomi (clade), Euteleostomi (clade), Sarcopterygii (superclass), Dipnotetrapodomorpha (clade), Tetrapoda (clade), Amniota (clade), Mammalia (class), The…	131567 (no rank), 2759 (superkingdom), 33154 (clade), 33208 (kingdom), 6072 (clade), 33213 (clade), 33511 (clade), 7711 (phylum), 89593 (subphylum), 7742 (clade), 7776 (clade), 117570 (clade), 117571 (clade), 8287 (superclass), 1338369 (clade), 32523 (clade), 32524 (clade), 40674 (class), 32525 (clade), 9347 (clade), 1437010 (clade), 314146 (superorder), 314147 (clade), 9989 (order), 1963758 (sub…			SUBUNIT: Homodimer; upon association with membrane. Part of the coat protein complex II/COPII, composed of SEC23/24 and SEC13/31 heterodimers, that it helps recruit and assemble on endoplasmic reticulum (ER) membranes at ER exit site (By similarity). Interacts with PREB; PREB acts as a guanine nucleotide exchange factor facilitating the activation of SAR1B by loading it with GTP (PubMed:11422940)…
Q9CQR4	-2.64636	21.8198	-4.15572	0.00280856	0.0316008	-1.83385	reviewed	ACO13_MOUSE	Acyl-coenzyme A thioesterase 13 (Acyl-CoA thioesterase 13) (EC 3.1.2.-) (Hotdog-fold thioesterase superfamily member 2) (Palmitoyl-CoA hydrolase) (EC 3.1.2.2) (Thioesterase superfamily member 2) (THEM2)	Acot13 Them2	140	lipid metabolic process [GO:0006629]; negative regulation of cold-induced thermogenesis [GO:0120163]; protein homotetramerization [GO:0051289]	cytosol [GO:0005829]; mitochondrial matrix [GO:0005759]; mitochondrion [GO:0005739]; nucleus [GO:0005634]; spindle [GO:0005819]	fatty acyl-CoA hydrolase activity [GO:0047617]	cytosol [GO:0005829]; mitochondrial matrix [GO:0005759]; mitochondrion [GO:0005739]; nucleus [GO:0005634]; spindle [GO:0005819]; fatty acyl-CoA hydrolase activity [GO:0047617]; lipid metabolic process [GO:0006629]; negative regulation of cold-induced thermogenesis [GO:0120163]; protein homotetramerization [GO:0051289]	GO:0005634; GO:0005739; GO:0005759; GO:0005819; GO:0005829; GO:0006629; GO:0047617; GO:0051289; GO:0120163		BINDING 46; /ligand=CoA; /ligand_id=ChEBI:CHEBI:57287; /evidence=ECO:0000250|UniProtKB:Q9NPJ3; BINDING 50; /ligand=substrate; /evidence=ECO:0000250|UniProtKB:Q9NPJ3; BINDING 81; /ligand=substrate; /evidence=ECO:0000250|UniProtKB:Q9NPJ3; BINDING 83; /ligand=CoA; /ligand_id=ChEBI:CHEBI:57287; /evidence=ECO:0000250|UniProtKB:Q9NPJ3; BINDING 90..95; /ligand=CoA; /ligand_id=ChEBI:CHEBI:57287; /evidenc…	cellular organisms (no rank), Eukaryota (superkingdom), Opisthokonta (clade), Metazoa (kingdom), Eumetazoa (clade), Bilateria (clade), Deuterostomia (clade), Chordata (phylum), Craniata (subphylum), Vertebrata (clade), Gnathostomata (clade), Teleostomi (clade), Euteleostomi (clade), Sarcopterygii (superclass), Dipnotetrapodomorpha (clade), Tetrapoda (clade), Amniota (clade), Mammalia (class), The…	131567 (no rank), 2759 (superkingdom), 33154 (clade), 33208 (kingdom), 6072 (clade), 33213 (clade), 33511 (clade), 7711 (phylum), 89593 (subphylum), 7742 (clade), 7776 (clade), 117570 (clade), 117571 (clade), 8287 (superclass), 1338369 (clade), 32523 (clade), 32524 (clade), 40674 (class), 32525 (clade), 9347 (clade), 1437010 (clade), 314146 (superorder), 314147 (clade), 9989 (order), 1963758 (sub…			SUBUNIT: Homotetramer. Interacts with PCTP. {ECO:0000269|PubMed:17704541, ECO:0000269|PubMed:19405909}.
Q9CZ44	0.950594	22.9887	3.40062	0.00858987	0.0498707	-2.9962	reviewed	NSF1C_MOUSE	NSFL1 cofactor p47 (p97 cofactor p47)	Nsfl1c	370	establishment of mitotic spindle orientation [GO:0000132]; negative regulation of protein localization to centrosome [GO:1904780]; positive regulation of mitotic centrosome separation [GO:0046604]	centrosome [GO:0005813]; chromosome [GO:0005694]; cytoplasm [GO:0005737]; Golgi stack [GO:0005795]; nucleus [GO:0005634]; VCP-NSFL1C complex [GO:1990730]	lipid binding [GO:0008289]	centrosome [GO:0005813]; chromosome [GO:0005694]; cytoplasm [GO:0005737]; Golgi stack [GO:0005795]; nucleus [GO:0005634]; VCP-NSFL1C complex [GO:1990730]; lipid binding [GO:0008289]; establishment of mitotic spindle orientation [GO:0000132]; negative regulation of protein localization to centrosome [GO:1904780]; positive regulation of mitotic centrosome separation [GO:0046604]	GO:0000132; GO:0005634; GO:0005694; GO:0005737; GO:0005795; GO:0005813; GO:0008289; GO:0046604; GO:1904780; GO:1990730			cellular organisms (no rank), Eukaryota (superkingdom), Opisthokonta (clade), Metazoa (kingdom), Eumetazoa (clade), Bilateria (clade), Deuterostomia (clade), Chordata (phylum), Craniata (subphylum), Vertebrata (clade), Gnathostomata (clade), Teleostomi (clade), Euteleostomi (clade), Sarcopterygii (superclass), Dipnotetrapodomorpha (clade), Tetrapoda (clade), Amniota (clade), Mammalia (class), The…	131567 (no rank), 2759 (superkingdom), 33154 (clade), 33208 (kingdom), 6072 (clade), 33213 (clade), 33511 (clade), 7711 (phylum), 89593 (subphylum), 7742 (clade), 7776 (clade), 117570 (clade), 117571 (clade), 8287 (superclass), 1338369 (clade), 32523 (clade), 32524 (clade), 40674 (class), 32525 (clade), 9347 (clade), 1437010 (clade), 314146 (superorder), 314147 (clade), 9989 (order), 1963758 (sub…	PTM: Phosphorylated during mitosis. Phosphorylation inhibits interaction with Golgi membranes and is required for the fragmentation of the Golgi stacks during mitosis (By similarity). {ECO:0000250}.		SUBUNIT: Part of a ternary complex containing STX5A, NSFL1C and VCP. NSFL1C forms a homotrimer that binds to one end of a VCP homohexamer. The complex binds to membranes enriched in phosphatidylethanolamine-containing lipids and promotes Golgi membrane fusion. Interaction with VCIP135 leads to dissociation of the complex via ATP hydrolysis by VCP. Binds ubiquitin and mono-ubiquitinated proteins v…
Q9D023	-0.687454	23.5489	-4.34564	0.00214704	0.0262525	-1.55263	reviewed	MPC2_MOUSE	Mitochondrial pyruvate carrier 2 (Brain protein 44)	Mpc2 Brp44	127	acetyl-CoA biosynthetic process from pyruvate [GO:0006086]; mitochondrial pyruvate transmembrane transport [GO:0006850]; positive regulation of insulin secretion involved in cellular response to glucose stimulus [GO:0035774]	mitochondrial inner membrane [GO:0005743]; mitochondrion [GO:0005739]	identical protein binding [GO:0042802]; pyruvate transmembrane transporter activity [GO:0050833]	mitochondrial inner membrane [GO:0005743]; mitochondrion [GO:0005739]; identical protein binding [GO:0042802]; pyruvate transmembrane transporter activity [GO:0050833]; acetyl-CoA biosynthetic process from pyruvate [GO:0006086]; mitochondrial pyruvate transmembrane transport [GO:0006850]; positive regulation of insulin secretion involved in cellular response to glucose stimulus [GO:0035774]	GO:0005739; GO:0005743; GO:0006086; GO:0006850; GO:0035774; GO:0042802; GO:0050833			cellular organisms (no rank), Eukaryota (superkingdom), Opisthokonta (clade), Metazoa (kingdom), Eumetazoa (clade), Bilateria (clade), Deuterostomia (clade), Chordata (phylum), Craniata (subphylum), Vertebrata (clade), Gnathostomata (clade), Teleostomi (clade), Euteleostomi (clade), Sarcopterygii (superclass), Dipnotetrapodomorpha (clade), Tetrapoda (clade), Amniota (clade), Mammalia (class), The…	131567 (no rank), 2759 (superkingdom), 33154 (clade), 33208 (kingdom), 6072 (clade), 33213 (clade), 33511 (clade), 7711 (phylum), 89593 (subphylum), 7742 (clade), 7776 (clade), 117570 (clade), 117571 (clade), 8287 (superclass), 1338369 (clade), 32523 (clade), 32524 (clade), 40674 (class), 32525 (clade), 9347 (clade), 1437010 (clade), 314146 (superorder), 314147 (clade), 9989 (order), 1963758 (sub…			SUBUNIT: Homodimer. Homooligomer. Forms heterodimers with MPC1 and MPC1L. The heterodimer is the more stable and dominant form. {ECO:0000250|UniProtKB:O95563}.
Q9D051	-0.635706	26.7101	-3.88587	0.00415046	0.0376339	-2.24166	reviewed	ODPB_MOUSE	Pyruvate dehydrogenase E1 component subunit beta, mitochondrial (PDHE1-B) (EC 1.2.4.1)	Pdhb	359	acetyl-CoA biosynthetic process from pyruvate [GO:0006086]; glucose metabolic process [GO:0006006]; tricarboxylic acid cycle [GO:0006099]	acetyltransferase complex [GO:1902493]; catalytic complex [GO:1902494]; mitochondrial matrix [GO:0005759]; mitochondrion [GO:0005739]; nucleoplasm [GO:0005654]; pyruvate dehydrogenase complex [GO:0045254]	metal ion binding [GO:0046872]; pyruvate dehydrogenase (acetyl-transferring) activity [GO:0004739]; pyruvate dehydrogenase (NAD+) activity [GO:0034604]	acetyltransferase complex [GO:1902493]; catalytic complex [GO:1902494]; mitochondrial matrix [GO:0005759]; mitochondrion [GO:0005739]; nucleoplasm [GO:0005654]; pyruvate dehydrogenase complex [GO:0045254]; metal ion binding [GO:0046872]; pyruvate dehydrogenase (acetyl-transferring) activity [GO:0004739]; pyruvate dehydrogenase (NAD+) activity [GO:0034604]; acetyl-CoA biosynthetic process from pyr…	GO:0004739; GO:0005654; GO:0005739; GO:0005759; GO:0006006; GO:0006086; GO:0006099; GO:0034604; GO:0045254; GO:0046872; GO:1902493; GO:1902494		BINDING 89; /ligand=thiamine diphosphate; /ligand_id=ChEBI:CHEBI:58937; /ligand_note=ligand shared with alpha subunit; /evidence=ECO:0000250|UniProtKB:P11177; BINDING 142; /ligand=K(+); /ligand_id=ChEBI:CHEBI:29103; /ligand_note=structural; /evidence=ECO:0000250|UniProtKB:P11177; BINDING 190; /ligand=K(+); /ligand_id=ChEBI:CHEBI:29103; /ligand_note=structural; /evidence=ECO:0000250|UniProtKB:P111…	cellular organisms (no rank), Eukaryota (superkingdom), Opisthokonta (clade), Metazoa (kingdom), Eumetazoa (clade), Bilateria (clade), Deuterostomia (clade), Chordata (phylum), Craniata (subphylum), Vertebrata (clade), Gnathostomata (clade), Teleostomi (clade), Euteleostomi (clade), Sarcopterygii (superclass), Dipnotetrapodomorpha (clade), Tetrapoda (clade), Amniota (clade), Mammalia (class), The…	131567 (no rank), 2759 (superkingdom), 33154 (clade), 33208 (kingdom), 6072 (clade), 33213 (clade), 33511 (clade), 7711 (phylum), 89593 (subphylum), 7742 (clade), 7776 (clade), 117570 (clade), 117571 (clade), 8287 (superclass), 1338369 (clade), 32523 (clade), 32524 (clade), 40674 (class), 32525 (clade), 9347 (clade), 1437010 (clade), 314146 (superorder), 314147 (clade), 9989 (order), 1963758 (sub…			SUBUNIT: Heterotetramer of two PDHA1 and two PDHB subunits. The heterotetramer interacts with DLAT, and is part of the multimeric pyruvate dehydrogenase complex that contains multiple copies of pyruvate dehydrogenase (E1), dihydrolipoamide acetyltransferase (DLAT, E2) and lipoamide dehydrogenase (DLD, E3). These subunits are bound to an inner core composed of about 48 DLAT and 12 PDHX molecules. …
Q9D0E1	0.988161	21.4407	3.50341	0.00734466	0.0455934	-2.8344	reviewed	HNRPM_MOUSE	Heterogeneous nuclear ribonucleoprotein M (hnRNP M)	Hnrnpm Hnrpm	729	alternative mRNA splicing, via spliceosome [GO:0000380]	catalytic step 2 spliceosome [GO:0071013]; collagen-containing extracellular matrix [GO:0062023]; nuclear matrix [GO:0016363]; paraspeckles [GO:0042382]; synapse [GO:0045202]	protein domain specific binding [GO:0019904]; RNA binding [GO:0003723]	catalytic step 2 spliceosome [GO:0071013]; collagen-containing extracellular matrix [GO:0062023]; nuclear matrix [GO:0016363]; paraspeckles [GO:0042382]; synapse [GO:0045202]; protein domain specific binding [GO:0019904]; RNA binding [GO:0003723]; alternative mRNA splicing, via spliceosome [GO:0000380]	GO:0000380; GO:0003723; GO:0016363; GO:0019904; GO:0042382; GO:0045202; GO:0062023; GO:0071013			cellular organisms (no rank), Eukaryota (superkingdom), Opisthokonta (clade), Metazoa (kingdom), Eumetazoa (clade), Bilateria (clade), Deuterostomia (clade), Chordata (phylum), Craniata (subphylum), Vertebrata (clade), Gnathostomata (clade), Teleostomi (clade), Euteleostomi (clade), Sarcopterygii (superclass), Dipnotetrapodomorpha (clade), Tetrapoda (clade), Amniota (clade), Mammalia (class), The…	131567 (no rank), 2759 (superkingdom), 33154 (clade), 33208 (kingdom), 6072 (clade), 33213 (clade), 33511 (clade), 7711 (phylum), 89593 (subphylum), 7742 (clade), 7776 (clade), 117570 (clade), 117571 (clade), 8287 (superclass), 1338369 (clade), 32523 (clade), 32524 (clade), 40674 (class), 32525 (clade), 9347 (clade), 1437010 (clade), 314146 (superorder), 314147 (clade), 9989 (order), 1963758 (sub…	PTM: Sumoylated. {ECO:0000250}.		SUBUNIT: Identified in the spliceosome C complex (By similarity). Interacts with PPIA/CYPA (By similarity). {ECO:0000250|UniProtKB:P52272}.
Q9D0K2	-1.10698	24.8244	-6.64356	0.000124695	0.00479186	1.43787	reviewed	SCOT1_MOUSE	Succinyl-CoA:3-ketoacid coenzyme A transferase 1, mitochondrial (SCOT) (EC 2.8.3.5) (3-oxoacid CoA-transferase 1) (Somatic-type succinyl-CoA:3-oxoacid CoA-transferase) (SCOT-s) (Succinyl-CoA:3-oxoacid CoA transferase)	Oxct1 Oxct Scot	520	ketone body catabolic process [GO:0046952]; ketone body metabolic process [GO:1902224]; ketone catabolic process [GO:0042182]	mitochondrion [GO:0005739]	succinyl-CoA:3-oxo-acid CoA-transferase activity [GO:0008260]	mitochondrion [GO:0005739]; succinyl-CoA:3-oxo-acid CoA-transferase activity [GO:0008260]; ketone body catabolic process [GO:0046952]; ketone body metabolic process [GO:1902224]; ketone catabolic process [GO:0042182]	GO:0005739; GO:0008260; GO:0042182; GO:0046952; GO:1902224	ACT_SITE 344; /note=5-glutamyl coenzyme A thioester intermediate; /evidence=ECO:0000255|PROSITE-ProRule:PRU10034		cellular organisms (no rank), Eukaryota (superkingdom), Opisthokonta (clade), Metazoa (kingdom), Eumetazoa (clade), Bilateria (clade), Deuterostomia (clade), Chordata (phylum), Craniata (subphylum), Vertebrata (clade), Gnathostomata (clade), Teleostomi (clade), Euteleostomi (clade), Sarcopterygii (superclass), Dipnotetrapodomorpha (clade), Tetrapoda (clade), Amniota (clade), Mammalia (class), The…	131567 (no rank), 2759 (superkingdom), 33154 (clade), 33208 (kingdom), 6072 (clade), 33213 (clade), 33511 (clade), 7711 (phylum), 89593 (subphylum), 7742 (clade), 7776 (clade), 117570 (clade), 117571 (clade), 8287 (superclass), 1338369 (clade), 32523 (clade), 32524 (clade), 40674 (class), 32525 (clade), 9347 (clade), 1437010 (clade), 314146 (superorder), 314147 (clade), 9989 (order), 1963758 (sub…			SUBUNIT: Homodimer. Only one subunit is competent to transfer the CoA moiety to the acceptor carboxylate (3-oxo acid). {ECO:0000250|UniProtKB:Q29551}.
Q9D2N4	0.791116	20.6032	3.67248	0.00569317	0.0429382	-2.57043	reviewed	DTNA_MOUSE	Dystrobrevin alpha (DTN-A) (Alpha-dystrobrevin)	Dtna Dtn	746		cytoplasm [GO:0005737]; dystrobrevin complex [GO:0016014]; protein-containing complex [GO:0032991]; sarcolemma [GO:0042383]; synapse [GO:0045202]	zinc ion binding [GO:0008270]	cytoplasm [GO:0005737]; dystrobrevin complex [GO:0016014]; protein-containing complex [GO:0032991]; sarcolemma [GO:0042383]; synapse [GO:0045202]; zinc ion binding [GO:0008270]	GO:0005737; GO:0008270; GO:0016014; GO:0032991; GO:0042383; GO:0045202		BINDING 243; /ligand=Zn(2+); /ligand_id=ChEBI:CHEBI:29105; /ligand_label=1; /evidence=ECO:0000255|PROSITE-ProRule:PRU00228; BINDING 246; /ligand=Zn(2+); /ligand_id=ChEBI:CHEBI:29105; /ligand_label=1; /evidence=ECO:0000255|PROSITE-ProRule:PRU00228; BINDING 258; /ligand=Zn(2+); /ligand_id=ChEBI:CHEBI:29105; /ligand_label=2; /evidence=ECO:0000255|PROSITE-ProRule:PRU00228; BINDING 261; /ligand=Zn(2+)…	cellular organisms (no rank), Eukaryota (superkingdom), Opisthokonta (clade), Metazoa (kingdom), Eumetazoa (clade), Bilateria (clade), Deuterostomia (clade), Chordata (phylum), Craniata (subphylum), Vertebrata (clade), Gnathostomata (clade), Teleostomi (clade), Euteleostomi (clade), Sarcopterygii (superclass), Dipnotetrapodomorpha (clade), Tetrapoda (clade), Amniota (clade), Mammalia (class), The…	131567 (no rank), 2759 (superkingdom), 33154 (clade), 33208 (kingdom), 6072 (clade), 33213 (clade), 33511 (clade), 7711 (phylum), 89593 (subphylum), 7742 (clade), 7776 (clade), 117570 (clade), 117571 (clade), 8287 (superclass), 1338369 (clade), 32523 (clade), 32524 (clade), 40674 (class), 32525 (clade), 9347 (clade), 1437010 (clade), 314146 (superorder), 314147 (clade), 9989 (order), 1963758 (sub…	PTM: Phosphorylation of isoform 2 on tyrosine kinase substrate domain present in the C-terminus.	Q91WZ8	SUBUNIT: Interacts with dystrophin, utrophin and the syntrophins SNTA1, SNTB1, SNTB2, SNTG1 and SNTG2. Binds dystrobrevin binding protein 1. Interacts with MAGEE1 (PubMed:11316798, PubMed:14623885, PubMed:7547961, PubMed:9214383). Interacts with Ctnnal1 (PubMed:22577143). The interaction is required for correct localization of both Ctnnal1 and Dtna (PubMed:22577143). {ECO:0000269|PubMed:11316798,…
Q9D358	0.936328	22.6069	7.3442	5.97648e-05	0.00333636	2.20621	reviewed	PPAC_MOUSE	Low molecular weight phosphotyrosine protein phosphatase (LMW-PTP) (LMW-PTPase) (EC 3.1.3.48) (Low molecular weight cytosolic acid phosphatase) (EC 3.1.3.2)	Acp1	158		cytoplasmic side of plasma membrane [GO:0009898]; cytosol [GO:0005829]; sarcolemma [GO:0042383]	acid phosphatase activity [GO:0003993]; histone H2AXY142 phosphatase activity [GO:0140793]; non-membrane spanning protein tyrosine phosphatase activity [GO:0004726]; phosphatase activity [GO:0016791]; protein tyrosine phosphatase activity [GO:0004725]; protein tyrosine phosphatase activity, metal-dependent [GO:0030946]	cytoplasmic side of plasma membrane [GO:0009898]; cytosol [GO:0005829]; sarcolemma [GO:0042383]; acid phosphatase activity [GO:0003993]; histone H2AXY142 phosphatase activity [GO:0140793]; non-membrane spanning protein tyrosine phosphatase activity [GO:0004726]; phosphatase activity [GO:0016791]; protein tyrosine phosphatase activity [GO:0004725]; protein tyrosine phosphatase activity, metal-depe…	GO:0003993; GO:0004725; GO:0004726; GO:0005829; GO:0009898; GO:0016791; GO:0030946; GO:0042383; GO:0140793	ACT_SITE 13; /note=Nucleophile; /evidence=ECO:0000250|UniProtKB:P11064; ACT_SITE 19; /evidence=ECO:0000250|UniProtKB:P11064; ACT_SITE 130; /note=Proton donor; /evidence=ECO:0000250|UniProtKB:P11064		cellular organisms (no rank), Eukaryota (superkingdom), Opisthokonta (clade), Metazoa (kingdom), Eumetazoa (clade), Bilateria (clade), Deuterostomia (clade), Chordata (phylum), Craniata (subphylum), Vertebrata (clade), Gnathostomata (clade), Teleostomi (clade), Euteleostomi (clade), Sarcopterygii (superclass), Dipnotetrapodomorpha (clade), Tetrapoda (clade), Amniota (clade), Mammalia (class), The…	131567 (no rank), 2759 (superkingdom), 33154 (clade), 33208 (kingdom), 6072 (clade), 33213 (clade), 33511 (clade), 7711 (phylum), 89593 (subphylum), 7742 (clade), 7776 (clade), 117570 (clade), 117571 (clade), 8287 (superclass), 1338369 (clade), 32523 (clade), 32524 (clade), 40674 (class), 32525 (clade), 9347 (clade), 1437010 (clade), 314146 (superorder), 314147 (clade), 9989 (order), 1963758 (sub…	PTM: [Isoform 2]: Phosphorylated by LCK. Phosphorylation at Tyr-132 increases its phosphatase activity. {ECO:0000250|UniProtKB:P24666}.		SUBUNIT: Interacts with EPHA2; dephosphorylates EPHA2. Interacts with EPHB1. {ECO:0000250|UniProtKB:P24666}.; SUBUNIT: [Isoform 1]: Interacts with the SH3 domain of SPTAN1. There is no interaction observed for isoform 2. {ECO:0000250|UniProtKB:P24666}.
Q9D3D9	-0.923644	25.1443	-4.67718	0.00136056	0.0213653	-1.07389	reviewed	ATPD_MOUSE	ATP synthase F(1) complex subunit delta, mitochondrial (ATP synthase F1 subunit delta) (F-ATPase delta subunit)	Atp5f1d Atp5d	168	aerobic respiration [GO:0009060]; mitochondrial proton-transporting ATP synthase complex assembly [GO:0033615]; proton motive force-driven mitochondrial ATP synthesis [GO:0042776]; proton transmembrane transport [GO:1902600]	mitochondrial envelope [GO:0005740]; mitochondrial inner membrane [GO:0005743]; mitochondrion [GO:0005739]; proton-transporting ATP synthase complex [GO:0045259]; proton-transporting ATP synthase complex, catalytic core F(1) [GO:0045261]	proton transmembrane transporter activity [GO:0015078]; proton-transporting ATP synthase activity, rotational mechanism [GO:0046933]; structural molecule activity [GO:0005198]	mitochondrial envelope [GO:0005740]; mitochondrial inner membrane [GO:0005743]; mitochondrion [GO:0005739]; proton-transporting ATP synthase complex [GO:0045259]; proton-transporting ATP synthase complex, catalytic core F(1) [GO:0045261]; proton transmembrane transporter activity [GO:0015078]; proton-transporting ATP synthase activity, rotational mechanism [GO:0046933]; structural molecule activi…	GO:0005198; GO:0005739; GO:0005740; GO:0005743; GO:0009060; GO:0015078; GO:0033615; GO:0042776; GO:0045259; GO:0045261; GO:0046933; GO:1902600			cellular organisms (no rank), Eukaryota (superkingdom), Opisthokonta (clade), Metazoa (kingdom), Eumetazoa (clade), Bilateria (clade), Deuterostomia (clade), Chordata (phylum), Craniata (subphylum), Vertebrata (clade), Gnathostomata (clade), Teleostomi (clade), Euteleostomi (clade), Sarcopterygii (superclass), Dipnotetrapodomorpha (clade), Tetrapoda (clade), Amniota (clade), Mammalia (class), The…	131567 (no rank), 2759 (superkingdom), 33154 (clade), 33208 (kingdom), 6072 (clade), 33213 (clade), 33511 (clade), 7711 (phylum), 89593 (subphylum), 7742 (clade), 7776 (clade), 117570 (clade), 117571 (clade), 8287 (superclass), 1338369 (clade), 32523 (clade), 32524 (clade), 40674 (class), 32525 (clade), 9347 (clade), 1437010 (clade), 314146 (superorder), 314147 (clade), 9989 (order), 1963758 (sub…			SUBUNIT: Component of the ATP synthase complex composed at least of ATP5F1A/subunit alpha, ATP5F1B/subunit beta, ATP5MC1/subunit c (homooctomer), MT-ATP6/subunit a, MT-ATP8/subunit 8, ATP5ME/subunit e, ATP5MF/subunit f, ATP5MG/subunit g, ATP5MK/subunit k, ATP5MJ/subunit j, ATP5F1C/subunit gamma, ATP5F1D/subunit delta, ATP5F1E/subunit epsilon, ATP5PF/subunit F6, ATP5PB/subunit b, ATP5PD/subunit d,…
Q9D6R2	-0.569272	27.7359	-3.56166	0.00672474	0.0440583	-2.74313	reviewed	IDH3A_MOUSE	Isocitrate dehydrogenase [NAD] subunit alpha, mitochondrial (EC 1.1.1.41) (Isocitric dehydrogenase subunit alpha) (NAD(+)-specific ICDH subunit alpha)	Idh3a	366	tricarboxylic acid cycle [GO:0006099]	isocitrate dehydrogenase complex (NAD+) [GO:0045242]; mitochondrion [GO:0005739]; myelin sheath [GO:0043209]	isocitrate dehydrogenase (NAD+) activity [GO:0004449]; magnesium ion binding [GO:0000287]; NAD binding [GO:0051287]	isocitrate dehydrogenase complex (NAD+) [GO:0045242]; mitochondrion [GO:0005739]; myelin sheath [GO:0043209]; isocitrate dehydrogenase (NAD+) activity [GO:0004449]; magnesium ion binding [GO:0000287]; NAD binding [GO:0051287]; tricarboxylic acid cycle [GO:0006099]	GO:0000287; GO:0004449; GO:0005739; GO:0006099; GO:0043209; GO:0045242; GO:0051287		BINDING 115; /ligand=substrate; /evidence=ECO:0000250|UniProtKB:P50213; BINDING 125; /ligand=substrate; /evidence=ECO:0000250|UniProtKB:P50213; BINDING 146; /ligand=substrate; /evidence=ECO:0000250|UniProtKB:P50213; BINDING 233; /ligand=Mg(2+); /ligand_id=ChEBI:CHEBI:18420; /evidence=ECO:0000250|UniProtKB:P50213; BINDING 257; /ligand=Mg(2+); /ligand_id=ChEBI:CHEBI:18420; /evidence=ECO:0000250|Uni…	cellular organisms (no rank), Eukaryota (superkingdom), Opisthokonta (clade), Metazoa (kingdom), Eumetazoa (clade), Bilateria (clade), Deuterostomia (clade), Chordata (phylum), Craniata (subphylum), Vertebrata (clade), Gnathostomata (clade), Teleostomi (clade), Euteleostomi (clade), Sarcopterygii (superclass), Dipnotetrapodomorpha (clade), Tetrapoda (clade), Amniota (clade), Mammalia (class), The…	131567 (no rank), 2759 (superkingdom), 33154 (clade), 33208 (kingdom), 6072 (clade), 33213 (clade), 33511 (clade), 7711 (phylum), 89593 (subphylum), 7742 (clade), 7776 (clade), 117570 (clade), 117571 (clade), 8287 (superclass), 1338369 (clade), 32523 (clade), 32524 (clade), 40674 (class), 32525 (clade), 9347 (clade), 1437010 (clade), 314146 (superorder), 314147 (clade), 9989 (order), 1963758 (sub…			SUBUNIT: Heterooligomer of subunits alpha (IDH3A), beta (IDH3B), and gamma (IDH3G) in the apparent ratio of 2:1:1. The heterodimer containing one IDH3A and one IDH3B subunit and the heterodimer containing one IDH3A and one IDH3G subunit assemble into a heterotetramer (which contains two subunits of IDH3A, one of IDH3B and one of IDH3G) and further into the heterooctamer. {ECO:0000250|UniProtKB:P5…
Q9D783	1.0096	24.9597	6.49472	0.00014683	0.00538597	1.26665	reviewed	KLH40_MOUSE	Kelch-like protein 40 (Kelch repeat and BTB domain-containing protein 5)	Klhl40 Kbtbd5	621	negative regulation of proteasomal ubiquitin-dependent protein catabolic process [GO:0032435]; negative regulation of protein ubiquitination [GO:0031397]; positive regulation of proteasomal ubiquitin-dependent protein catabolic process [GO:0032436]; positive regulation of protein ubiquitination [GO:0031398]; proteasome-mediated ubiquitin-dependent protein catabolic process [GO:0043161]; protein u…	A band [GO:0031672]; Cul3-RING ubiquitin ligase complex [GO:0031463]; cytoplasm [GO:0005737]; I band [GO:0031674]		A band [GO:0031672]; Cul3-RING ubiquitin ligase complex [GO:0031463]; cytoplasm [GO:0005737]; I band [GO:0031674]; negative regulation of proteasomal ubiquitin-dependent protein catabolic process [GO:0032435]; negative regulation of protein ubiquitination [GO:0031397]; positive regulation of proteasomal ubiquitin-dependent protein catabolic process [GO:0032436]; positive regulation of protein ubi…	GO:0005737; GO:0016567; GO:0031397; GO:0031398; GO:0031463; GO:0031672; GO:0031674; GO:0032435; GO:0032436; GO:0043161; GO:0048741; GO:0098528			cellular organisms (no rank), Eukaryota (superkingdom), Opisthokonta (clade), Metazoa (kingdom), Eumetazoa (clade), Bilateria (clade), Deuterostomia (clade), Chordata (phylum), Craniata (subphylum), Vertebrata (clade), Gnathostomata (clade), Teleostomi (clade), Euteleostomi (clade), Sarcopterygii (superclass), Dipnotetrapodomorpha (clade), Tetrapoda (clade), Amniota (clade), Mammalia (class), The…	131567 (no rank), 2759 (superkingdom), 33154 (clade), 33208 (kingdom), 6072 (clade), 33213 (clade), 33511 (clade), 7711 (phylum), 89593 (subphylum), 7742 (clade), 7776 (clade), 117570 (clade), 117571 (clade), 8287 (superclass), 1338369 (clade), 32523 (clade), 32524 (clade), 40674 (class), 32525 (clade), 9347 (clade), 1437010 (clade), 314146 (superorder), 314147 (clade), 9989 (order), 1963758 (sub…			SUBUNIT: Component of the BCR(KLHL40) E3 ubiquitin ligase complex, at least composed of CUL3, KLHL40 and RBX1 (PubMed:24361185). Interacts with LMOD3 (PubMed:24960163). {ECO:0000269|PubMed:24361185, ECO:0000269|PubMed:24960163}.
Q9DCZ4	-0.815683	22.2988	-3.39558	0.00865638	0.0498979	-3.00416	reviewed	MIC26_MOUSE	MICOS complex subunit Mic26 (Apolipoprotein O) (MICOS complex subunit Mic23) (Protein FAM121B)	Apoo Fam121b Mic23 Mic26	198	cristae formation [GO:0042407]	cytosol [GO:0005829]; endoplasmic reticulum membrane [GO:0005789]; extracellular region [GO:0005576]; Golgi membrane [GO:0000139]; MICOS complex [GO:0061617]; mitochondrial inner membrane [GO:0005743]; mitochondrion [GO:0005739]		cytosol [GO:0005829]; endoplasmic reticulum membrane [GO:0005789]; extracellular region [GO:0005576]; Golgi membrane [GO:0000139]; MICOS complex [GO:0061617]; mitochondrial inner membrane [GO:0005743]; mitochondrion [GO:0005739]; cristae formation [GO:0042407]	GO:0000139; GO:0005576; GO:0005739; GO:0005743; GO:0005789; GO:0005829; GO:0042407; GO:0061617			cellular organisms (no rank), Eukaryota (superkingdom), Opisthokonta (clade), Metazoa (kingdom), Eumetazoa (clade), Bilateria (clade), Deuterostomia (clade), Chordata (phylum), Craniata (subphylum), Vertebrata (clade), Gnathostomata (clade), Teleostomi (clade), Euteleostomi (clade), Sarcopterygii (superclass), Dipnotetrapodomorpha (clade), Tetrapoda (clade), Amniota (clade), Mammalia (class), The…	131567 (no rank), 2759 (superkingdom), 33154 (clade), 33208 (kingdom), 6072 (clade), 33213 (clade), 33511 (clade), 7711 (phylum), 89593 (subphylum), 7742 (clade), 7776 (clade), 117570 (clade), 117571 (clade), 8287 (superclass), 1338369 (clade), 32523 (clade), 32524 (clade), 40674 (class), 32525 (clade), 9347 (clade), 1437010 (clade), 314146 (superorder), 314147 (clade), 9989 (order), 1963758 (sub…			SUBUNIT: Component of the mitochondrial contact site and cristae organizing system (MICOS) complex, composed of at least MICOS10/MIC10, CHCHD3/MIC19, CHCHD6/MIC25, APOOL/MIC27, IMMT/MIC60, APOO/MIC23/MIC26 and MICOS13/MIC13. This complex was also known under the names MINOS or MitOS complex. The MICOS complex associates with mitochondrial outer membrane proteins SAMM50, MTX1 and MTX2 (together de…
Q9EQP2	1.39833	21.7079	7.18529	7.02826e-05	0.00333636	2.03723	reviewed	EHD4_MOUSE	EH domain-containing protein 4 (PAST homolog 2) (mPAST2)	Ehd4 Past2	541	cell migration involved in sprouting angiogenesis [GO:0002042]; cellular response to growth factor stimulus [GO:0071363]; endocytic recycling [GO:0032456]; pinocytosis [GO:0006907]; protein homooligomerization [GO:0051260]; regulation of endocytosis [GO:0030100]	adherens junction [GO:0005912]; early endosome membrane [GO:0031901]; endoplasmic reticulum [GO:0005783]; perinuclear region of cytoplasm [GO:0048471]; plasma membrane [GO:0005886]; recycling endosome membrane [GO:0055038]	ATP binding [GO:0005524]; calcium ion binding [GO:0005509]; GTP binding [GO:0005525]; protein-macromolecule adaptor activity [GO:0030674]	adherens junction [GO:0005912]; early endosome membrane [GO:0031901]; endoplasmic reticulum [GO:0005783]; perinuclear region of cytoplasm [GO:0048471]; plasma membrane [GO:0005886]; recycling endosome membrane [GO:0055038]; ATP binding [GO:0005524]; calcium ion binding [GO:0005509]; GTP binding [GO:0005525]; protein-macromolecule adaptor activity [GO:0030674]; cell migration involved in sprouting…	GO:0002042; GO:0005509; GO:0005524; GO:0005525; GO:0005783; GO:0005886; GO:0005912; GO:0006907; GO:0030100; GO:0030674; GO:0031901; GO:0032456; GO:0048471; GO:0051260; GO:0055038; GO:0071363		BINDING 68..75; /ligand=ATP; /ligand_id=ChEBI:CHEBI:30616; /evidence=ECO:0000250|UniProtKB:Q8BH64; BINDING 223; /ligand=ATP; /ligand_id=ChEBI:CHEBI:30616; /evidence=ECO:0000250|UniProtKB:Q8BH64; BINDING 261; /ligand=ATP; /ligand_id=ChEBI:CHEBI:30616; /evidence=ECO:0000250|UniProtKB:Q8BH64; BINDING 492; /ligand=Ca(2+); /ligand_id=ChEBI:CHEBI:29108; /evidence=ECO:0000255|PROSITE-ProRule:PRU00448; B…	cellular organisms (no rank), Eukaryota (superkingdom), Opisthokonta (clade), Metazoa (kingdom), Eumetazoa (clade), Bilateria (clade), Deuterostomia (clade), Chordata (phylum), Craniata (subphylum), Vertebrata (clade), Gnathostomata (clade), Teleostomi (clade), Euteleostomi (clade), Sarcopterygii (superclass), Dipnotetrapodomorpha (clade), Tetrapoda (clade), Amniota (clade), Mammalia (class), The…	131567 (no rank), 2759 (superkingdom), 33154 (clade), 33208 (kingdom), 6072 (clade), 33213 (clade), 33511 (clade), 7711 (phylum), 89593 (subphylum), 7742 (clade), 7776 (clade), 117570 (clade), 117571 (clade), 8287 (superclass), 1338369 (clade), 32523 (clade), 32524 (clade), 40674 (class), 32525 (clade), 9347 (clade), 1437010 (clade), 314146 (superorder), 314147 (clade), 9989 (order), 1963758 (sub…		Q9QY17; Q9Z2P6	SUBUNIT: Homooligomer, and heterooligomer with EHD1, EHD2 and EHD3. Forms a complex with EHD4 and MICALL1; the complex controls CDH5 trafficking and coordinates angiogenesis (PubMed:33972531). {ECO:0000250|UniProtKB:Q9H223, ECO:0000269|PubMed:33972531}.
Q9JIF9	0.737391	28.5398	4.94189	0.000956186	0.0174197	-0.703139	reviewed	MYOTI_MOUSE	Myotilin (Myofibrillar titin-like Ig domains protein) (Titin immunoglobulin domain protein)	Myot Myo Ttid	496		cytoskeleton [GO:0005856]; sarcolemma [GO:0042383]; Z disc [GO:0030018]	actin binding [GO:0003779]; alpha-actinin binding [GO:0051393]	cytoskeleton [GO:0005856]; sarcolemma [GO:0042383]; Z disc [GO:0030018]; actin binding [GO:0003779]; alpha-actinin binding [GO:0051393]	GO:0003779; GO:0005856; GO:0030018; GO:0042383; GO:0051393			cellular organisms (no rank), Eukaryota (superkingdom), Opisthokonta (clade), Metazoa (kingdom), Eumetazoa (clade), Bilateria (clade), Deuterostomia (clade), Chordata (phylum), Craniata (subphylum), Vertebrata (clade), Gnathostomata (clade), Teleostomi (clade), Euteleostomi (clade), Sarcopterygii (superclass), Dipnotetrapodomorpha (clade), Tetrapoda (clade), Amniota (clade), Mammalia (class), The…	131567 (no rank), 2759 (superkingdom), 33154 (clade), 33208 (kingdom), 6072 (clade), 33213 (clade), 33511 (clade), 7711 (phylum), 89593 (subphylum), 7742 (clade), 7776 (clade), 117570 (clade), 117571 (clade), 8287 (superclass), 1338369 (clade), 32523 (clade), 32524 (clade), 40674 (class), 32525 (clade), 9347 (clade), 1437010 (clade), 314146 (superorder), 314147 (clade), 9989 (order), 1963758 (sub…			SUBUNIT: Homodimer. Interacts with ACTA1, ACTN1, FLNA, FLNB, FLNC, and MYOZ2. Interacts with the C-terminal region of MYOZ1 (By similarity). {ECO:0000250}.
Q9JK92	1.79846	23.0075	7.86783	3.56782e-05	0.00239936	2.74224	reviewed	HSPB8_MOUSE	Heat shock protein beta-8 (HspB8) (Alpha-crystallin C chain) (Small stress protein-like protein HSP22)	Hspb8 Cryac Hsp22	196	cellular response to unfolded protein [GO:0034620]; positive regulation of aggrephagy [GO:1905337]	cytoplasm [GO:0005737]; cytosol [GO:0005829]; nucleoplasm [GO:0005654]; nucleus [GO:0005634]; protein folding chaperone complex [GO:0101031]	protein homodimerization activity [GO:0042803]	cytoplasm [GO:0005737]; cytosol [GO:0005829]; nucleoplasm [GO:0005654]; nucleus [GO:0005634]; protein folding chaperone complex [GO:0101031]; protein homodimerization activity [GO:0042803]; cellular response to unfolded protein [GO:0034620]; positive regulation of aggrephagy [GO:1905337]	GO:0005634; GO:0005654; GO:0005737; GO:0005829; GO:0034620; GO:0042803; GO:0101031; GO:1905337			cellular organisms (no rank), Eukaryota (superkingdom), Opisthokonta (clade), Metazoa (kingdom), Eumetazoa (clade), Bilateria (clade), Deuterostomia (clade), Chordata (phylum), Craniata (subphylum), Vertebrata (clade), Gnathostomata (clade), Teleostomi (clade), Euteleostomi (clade), Sarcopterygii (superclass), Dipnotetrapodomorpha (clade), Tetrapoda (clade), Amniota (clade), Mammalia (class), The…	131567 (no rank), 2759 (superkingdom), 33154 (clade), 33208 (kingdom), 6072 (clade), 33213 (clade), 33511 (clade), 7711 (phylum), 89593 (subphylum), 7742 (clade), 7776 (clade), 117570 (clade), 117571 (clade), 8287 (superclass), 1338369 (clade), 32523 (clade), 32524 (clade), 40674 (class), 32525 (clade), 9347 (clade), 1437010 (clade), 314146 (superorder), 314147 (clade), 9989 (order), 1963758 (sub…			SUBUNIT: Monomer. Interacts with HSPB1 (By similarity). Interacts with DNAJB6 (By similarity). Interacts with BAG3 (By similarity). {ECO:0000250|UniProtKB:Q9UJY1}.
Q9JLV1	1.63349	23.2286	5.75228	0.000345534	0.00929486	0.367775	reviewed	BAG3_MOUSE	BAG family molecular chaperone regulator 3 (BAG-3) (Bcl-2-associated athanogene 3) (Bcl-2-binding protein Bis)	Bag3 Bis MNCb-2243	577	cellular response to heat [GO:0034605]; cellular response to mechanical stimulus [GO:0071260]; cellular response to unfolded protein [GO:0034620]; extrinsic apoptotic signaling pathway in absence of ligand [GO:0097192]; extrinsic apoptotic signaling pathway via death domain receptors [GO:0008625]; muscle cell cellular homeostasis [GO:0046716]; negative regulation of protein targeting to mitochond…	ciliary basal body [GO:0036064]; cytoplasm [GO:0005737]; cytosol [GO:0005829]; mitochondrion [GO:0005739]; nucleoplasm [GO:0005654]; nucleus [GO:0005634]; protein folding chaperone complex [GO:0101031]; Z disc [GO:0030018]	adenyl-nucleotide exchange factor activity [GO:0000774]; protein-containing complex binding [GO:0044877]; protein-folding chaperone binding [GO:0051087]	ciliary basal body [GO:0036064]; cytoplasm [GO:0005737]; cytosol [GO:0005829]; mitochondrion [GO:0005739]; nucleoplasm [GO:0005654]; nucleus [GO:0005634]; protein folding chaperone complex [GO:0101031]; Z disc [GO:0030018]; adenyl-nucleotide exchange factor activity [GO:0000774]; protein-containing complex binding [GO:0044877]; protein-folding chaperone binding [GO:0051087]; cellular response to …	GO:0000774; GO:0005634; GO:0005654; GO:0005737; GO:0005739; GO:0005829; GO:0008625; GO:0010658; GO:0010664; GO:0021510; GO:0030018; GO:0034605; GO:0034620; GO:0036064; GO:0042307; GO:0044877; GO:0046716; GO:0046827; GO:0050821; GO:0051087; GO:0071260; GO:0097192; GO:0101031; GO:1903215; GO:1905337			cellular organisms (no rank), Eukaryota (superkingdom), Opisthokonta (clade), Metazoa (kingdom), Eumetazoa (clade), Bilateria (clade), Deuterostomia (clade), Chordata (phylum), Craniata (subphylum), Vertebrata (clade), Gnathostomata (clade), Teleostomi (clade), Euteleostomi (clade), Sarcopterygii (superclass), Dipnotetrapodomorpha (clade), Tetrapoda (clade), Amniota (clade), Mammalia (class), The…	131567 (no rank), 2759 (superkingdom), 33154 (clade), 33208 (kingdom), 6072 (clade), 33213 (clade), 33511 (clade), 7711 (phylum), 89593 (subphylum), 7742 (clade), 7776 (clade), 117570 (clade), 117571 (clade), 8287 (superclass), 1338369 (clade), 32523 (clade), 32524 (clade), 40674 (class), 32525 (clade), 9347 (clade), 1437010 (clade), 314146 (superorder), 314147 (clade), 9989 (order), 1963758 (sub…		Q8AZK7	SUBUNIT: Binds to the ATPase domain of HSP70/HSC70 chaperones. Interacts with BCL2. Interacts with phospholipase C-gamma proteins. Interacts with DNAJB6. Interacts (via BAG domain) with HSF1; this interaction occurs in normal and heat-shocked cells. Interacts with HSPA8 (via NBD), HSPA1A (via NBD) and HSPA1B (via NBD). Interacts (via WW domain 1) with SYNPO2 (via PPPY motif). {ECO:0000250|UniProt…
Q9JMA1	2.73041	21.7573	4.92991	0.000971356	0.0174197	-0.719694	reviewed	UBP14_MOUSE	Ubiquitin carboxyl-terminal hydrolase 14 (EC 3.4.19.12) (Deubiquitinating enzyme 14) (Ubiquitin thioesterase 14) (Ubiquitin-specific-processing protease 14)	Usp14	493	chemical synaptic transmission [GO:0007268]; innate immune response [GO:0045087]; negative regulation of ERAD pathway [GO:1904293]; negative regulation of ubiquitin-dependent protein catabolic process [GO:2000059]; proteasome-mediated ubiquitin-dependent protein catabolic process [GO:0043161]; protein K48-linked deubiquitination [GO:0071108]; regulation of chemotaxis [GO:0050920]	cell surface [GO:0009986]; cytoplasmic vesicle [GO:0031410]; endoplasmic reticulum [GO:0005783]; glutamatergic synapse [GO:0098978]; nucleolus [GO:0005730]; plasma membrane [GO:0005886]; presynaptic cytosol [GO:0099523]; proteasome complex [GO:0000502]; synapse [GO:0045202]	cysteine-type deubiquitinase activity [GO:0004843]; endopeptidase inhibitor activity [GO:0004866]; proteasome binding [GO:0070628]	cell surface [GO:0009986]; cytoplasmic vesicle [GO:0031410]; endoplasmic reticulum [GO:0005783]; glutamatergic synapse [GO:0098978]; nucleolus [GO:0005730]; plasma membrane [GO:0005886]; presynaptic cytosol [GO:0099523]; proteasome complex [GO:0000502]; synapse [GO:0045202]; cysteine-type deubiquitinase activity [GO:0004843]; endopeptidase inhibitor activity [GO:0004866]; proteasome binding [GO:0…	GO:0000502; GO:0004843; GO:0004866; GO:0005730; GO:0005783; GO:0005886; GO:0007268; GO:0009986; GO:0031410; GO:0043161; GO:0045087; GO:0045202; GO:0050920; GO:0070628; GO:0071108; GO:0098978; GO:0099523; GO:1904293; GO:2000059	ACT_SITE 114; /note=Nucleophile; /evidence=ECO:0000255|PROSITE-ProRule:PRU10092, ECO:0000255|PROSITE-ProRule:PRU10093; ACT_SITE 434; /note=Proton acceptor; /evidence=ECO:0000255|PROSITE-ProRule:PRU10092, ECO:0000255|PROSITE-ProRule:PRU10093		cellular organisms (no rank), Eukaryota (superkingdom), Opisthokonta (clade), Metazoa (kingdom), Eumetazoa (clade), Bilateria (clade), Deuterostomia (clade), Chordata (phylum), Craniata (subphylum), Vertebrata (clade), Gnathostomata (clade), Teleostomi (clade), Euteleostomi (clade), Sarcopterygii (superclass), Dipnotetrapodomorpha (clade), Tetrapoda (clade), Amniota (clade), Mammalia (class), The…	131567 (no rank), 2759 (superkingdom), 33154 (clade), 33208 (kingdom), 6072 (clade), 33213 (clade), 33511 (clade), 7711 (phylum), 89593 (subphylum), 7742 (clade), 7776 (clade), 117570 (clade), 117571 (clade), 8287 (superclass), 1338369 (clade), 32523 (clade), 32524 (clade), 40674 (class), 32525 (clade), 9347 (clade), 1437010 (clade), 314146 (superorder), 314147 (clade), 9989 (order), 1963758 (sub…			SUBUNIT: Homodimer (Potential). Associates with the 26S proteasome. Interacts with FANCC, CXCR4 and ERN1. Interacts with TRIM14; this interaction recruits USP14 to cleave ubiquitin chains of CGAS and KDM4D (By similarity). {ECO:0000250|UniProtKB:P54578}.
Q9QZJ6	1.27286	23.0465	4.01565	0.00343526	0.0342254	-2.04436	reviewed	MFAP5_MOUSE	Microfibrillar-associated protein 5 (MFAP-5) (Microfibril-associated glycoprotein 2) (MAGP-2)	Mfap5 Magp2	164	definitive hemopoiesis [GO:0060216]; supramolecular fiber organization [GO:0097435]	collagen-containing extracellular matrix [GO:0062023]; extracellular matrix [GO:0031012]; extracellular region [GO:0005576]; microfibril [GO:0001527]	extracellular matrix constituent conferring elasticity [GO:0030023]	collagen-containing extracellular matrix [GO:0062023]; extracellular matrix [GO:0031012]; extracellular region [GO:0005576]; microfibril [GO:0001527]; extracellular matrix constituent conferring elasticity [GO:0030023]; definitive hemopoiesis [GO:0060216]; supramolecular fiber organization [GO:0097435]	GO:0001527; GO:0005576; GO:0030023; GO:0031012; GO:0060216; GO:0062023; GO:0097435			cellular organisms (no rank), Eukaryota (superkingdom), Opisthokonta (clade), Metazoa (kingdom), Eumetazoa (clade), Bilateria (clade), Deuterostomia (clade), Chordata (phylum), Craniata (subphylum), Vertebrata (clade), Gnathostomata (clade), Teleostomi (clade), Euteleostomi (clade), Sarcopterygii (superclass), Dipnotetrapodomorpha (clade), Tetrapoda (clade), Amniota (clade), Mammalia (class), The…	131567 (no rank), 2759 (superkingdom), 33154 (clade), 33208 (kingdom), 6072 (clade), 33213 (clade), 33511 (clade), 7711 (phylum), 89593 (subphylum), 7742 (clade), 7776 (clade), 117570 (clade), 117571 (clade), 8287 (superclass), 1338369 (clade), 32523 (clade), 32524 (clade), 40674 (class), 32525 (clade), 9347 (clade), 1437010 (clade), 314146 (superorder), 314147 (clade), 9989 (order), 1963758 (sub…	PTM: Forms intermolecular disulfide bonds either with other MAGP-2 molecules or with other components of the microfibrils. {ECO:0000250}.		SUBUNIT: Interacts with TGFB2 (PubMed:23963447). Interacts with BMP2. Interacts with FBN1 (via N-terminal domain) and FBN2 (By similarity). {ECO:0000250|UniProtKB:Q28022, ECO:0000269|PubMed:23963447}.
Q9R059	0.817342	23.5169	5.14404	0.000735406	0.0148368	-0.426965	reviewed	FHL3_MOUSE	Four and a half LIM domains protein 3 (FHL-3) (Skeletal muscle LIM-protein 2) (SLIM-2)	Fhl3	289	actin cytoskeleton organization [GO:0030036]	nucleus [GO:0005634]; stress fiber [GO:0001725]; Z disc [GO:0030018]	actin binding [GO:0003779]; zinc ion binding [GO:0008270]	nucleus [GO:0005634]; stress fiber [GO:0001725]; Z disc [GO:0030018]; actin binding [GO:0003779]; zinc ion binding [GO:0008270]; actin cytoskeleton organization [GO:0030036]	GO:0001725; GO:0003779; GO:0005634; GO:0008270; GO:0030018; GO:0030036			cellular organisms (no rank), Eukaryota (superkingdom), Opisthokonta (clade), Metazoa (kingdom), Eumetazoa (clade), Bilateria (clade), Deuterostomia (clade), Chordata (phylum), Craniata (subphylum), Vertebrata (clade), Gnathostomata (clade), Teleostomi (clade), Euteleostomi (clade), Sarcopterygii (superclass), Dipnotetrapodomorpha (clade), Tetrapoda (clade), Amniota (clade), Mammalia (class), The…	131567 (no rank), 2759 (superkingdom), 33154 (clade), 33208 (kingdom), 6072 (clade), 33213 (clade), 33511 (clade), 7711 (phylum), 89593 (subphylum), 7742 (clade), 7776 (clade), 117570 (clade), 117571 (clade), 8287 (superclass), 1338369 (clade), 32523 (clade), 32524 (clade), 40674 (class), 32525 (clade), 9347 (clade), 1437010 (clade), 314146 (superorder), 314147 (clade), 9989 (order), 1963758 (sub…		P43267	SUBUNIT: Interacts with SOX15; the interaction recruits FHL3 to FOXK1 promoters where it acts as a transcriptional coactivator of FOXK1. {ECO:0000269|PubMed:17363903}.
Q9WTI7	0.563928	21.212	4.4957	0.00174301	0.0234106	-1.33399	reviewed	MYO1C_MOUSE	Unconventional myosin-Ic (Myosin I beta) (MMI-beta) (MMIb)	Myo1c	1063	cellular response to type II interferon [GO:0071346]; chromatin remodeling [GO:0006338]; positive regulation of cell migration [GO:0030335]; positive regulation of cellular response to insulin stimulus [GO:1900078]; positive regulation of protein targeting to membrane [GO:0090314]; positive regulation of transcription by RNA polymerase I [GO:0045943]; positive regulation of transcription by RNA p…	B-WICH complex [GO:0110016]; basal plasma membrane [GO:0009925]; brush border [GO:0005903]; cell cortex [GO:0005938]; cytoplasmic vesicle membrane [GO:0030659]; cytosol [GO:0005829]; filamentous actin [GO:0031941]; lateral plasma membrane [GO:0016328]; membrane [GO:0016020]; membrane raft [GO:0045121]; microvillus [GO:0005902]; myosin complex [GO:0016459]; nuclear body [GO:0016604]; nucleolus [GO…	actin binding [GO:0003779]; ATP binding [GO:0005524]; calmodulin binding [GO:0005516]; microfilament motor activity [GO:0000146]; phospholipid binding [GO:0005543]; signaling receptor binding [GO:0005102]; small GTPase binding [GO:0031267]	B-WICH complex [GO:0110016]; basal plasma membrane [GO:0009925]; brush border [GO:0005903]; cell cortex [GO:0005938]; cytoplasmic vesicle membrane [GO:0030659]; cytosol [GO:0005829]; filamentous actin [GO:0031941]; lateral plasma membrane [GO:0016328]; membrane [GO:0016020]; membrane raft [GO:0045121]; microvillus [GO:0005902]; myosin complex [GO:0016459]; nuclear body [GO:0016604]; nucleolus [GO…	GO:0000146; GO:0003779; GO:0005102; GO:0005516; GO:0005524; GO:0005543; GO:0005730; GO:0005829; GO:0005886; GO:0005902; GO:0005903; GO:0005938; GO:0006338; GO:0006612; GO:0009925; GO:0016020; GO:0016328; GO:0016459; GO:0016604; GO:0030050; GO:0030335; GO:0030659; GO:0031267; GO:0031941; GO:0032420; GO:0032587; GO:0038084; GO:0045121; GO:0045335; GO:0045943; GO:0045944; GO:0045945; GO:0060171; GO:…		BINDING 88; /ligand=ATP; /ligand_id=ChEBI:CHEBI:30616; /evidence=ECO:0000250; BINDING 96; /ligand=ATP; /ligand_id=ChEBI:CHEBI:30616; /evidence=ECO:0000250; BINDING 139..148; /ligand=ATP; /ligand_id=ChEBI:CHEBI:30616; /evidence=ECO:0000250; BINDING 192..196; /ligand=ATP; /ligand_id=ChEBI:CHEBI:30616; /evidence=ECO:0000250	cellular organisms (no rank), Eukaryota (superkingdom), Opisthokonta (clade), Metazoa (kingdom), Eumetazoa (clade), Bilateria (clade), Deuterostomia (clade), Chordata (phylum), Craniata (subphylum), Vertebrata (clade), Gnathostomata (clade), Teleostomi (clade), Euteleostomi (clade), Sarcopterygii (superclass), Dipnotetrapodomorpha (clade), Tetrapoda (clade), Amniota (clade), Mammalia (class), The…	131567 (no rank), 2759 (superkingdom), 33154 (clade), 33208 (kingdom), 6072 (clade), 33213 (clade), 33511 (clade), 7711 (phylum), 89593 (subphylum), 7742 (clade), 7776 (clade), 117570 (clade), 117571 (clade), 8287 (superclass), 1338369 (clade), 32523 (clade), 32524 (clade), 40674 (class), 32525 (clade), 9347 (clade), 1437010 (clade), 314146 (superorder), 314147 (clade), 9989 (order), 1963758 (sub…	PTM: Isoform 2 contains a N-acetylmethionine at position 1. {ECO:0000250}.	Q9QYE9-1; Q9QYE9-2; P62158	SUBUNIT: Interacts (via its IQ motifs) with CABP1 and CIB1; the interaction with CABP1 and CIB1 is calcium-dependent (PubMed:17994197). Interacts (via tail domain) with PLEKHB1 (via PH domain); the interaction is not affected by the presence or absence of calcium and CALM (PubMed:15976448). Interacts with POLR1A (PubMed:16514417). Interacts with POLR2A (PubMed:11030652, PubMed:16960872). Componen…
Q9WTR5	0.555565	23.5709	3.75205	0.00505655	0.0408064	-2.44722	reviewed	CAD13_MOUSE	Cadherin-13 (Heart cadherin) (H-cadherin) (Truncated cadherin) (T-cad) (T-cadherin)	Cdh13	714	calcium-dependent cell-cell adhesion via plasma membrane cell adhesion molecules [GO:0016339]; cellular response to toxic substance [GO:0097237]; cellular response to xenobiotic stimulus [GO:0071466]; endothelial cell migration [GO:0043542]; homophilic cell adhesion via plasma membrane adhesion molecules [GO:0007156]; keratinocyte proliferation [GO:0043616]; lamellipodium assembly [GO:0030032]; l…	caveola [GO:0005901]; external side of plasma membrane [GO:0009897]; extracellular space [GO:0005615]; GABA-ergic synapse [GO:0098982]; neuron projection [GO:0043005]; perinuclear region of cytoplasm [GO:0048471]; plasma membrane [GO:0005886]	adiponectin binding [GO:0055100]; cadherin binding [GO:0045296]; calcium ion binding [GO:0005509]; identical protein binding [GO:0042802]; low-density lipoprotein particle binding [GO:0030169]	caveola [GO:0005901]; external side of plasma membrane [GO:0009897]; extracellular space [GO:0005615]; GABA-ergic synapse [GO:0098982]; neuron projection [GO:0043005]; perinuclear region of cytoplasm [GO:0048471]; plasma membrane [GO:0005886]; adiponectin binding [GO:0055100]; cadherin binding [GO:0045296]; calcium ion binding [GO:0005509]; identical protein binding [GO:0042802]; low-density lipo…	GO:0001938; GO:0001954; GO:0002040; GO:0005509; GO:0005615; GO:0005886; GO:0005901; GO:0007156; GO:0007162; GO:0007266; GO:0008285; GO:0009897; GO:0016339; GO:0016601; GO:0030032; GO:0030100; GO:0030169; GO:0030335; GO:0042058; GO:0042802; GO:0043005; GO:0043542; GO:0043616; GO:0045296; GO:0045944; GO:0048471; GO:0048661; GO:0050850; GO:0050927; GO:0051668; GO:0055096; GO:0055100; GO:0071466; GO:…			cellular organisms (no rank), Eukaryota (superkingdom), Opisthokonta (clade), Metazoa (kingdom), Eumetazoa (clade), Bilateria (clade), Deuterostomia (clade), Chordata (phylum), Craniata (subphylum), Vertebrata (clade), Gnathostomata (clade), Teleostomi (clade), Euteleostomi (clade), Sarcopterygii (superclass), Dipnotetrapodomorpha (clade), Tetrapoda (clade), Amniota (clade), Mammalia (class), The…	131567 (no rank), 2759 (superkingdom), 33154 (clade), 33208 (kingdom), 6072 (clade), 33213 (clade), 33511 (clade), 7711 (phylum), 89593 (subphylum), 7742 (clade), 7776 (clade), 117570 (clade), 117571 (clade), 8287 (superclass), 1338369 (clade), 32523 (clade), 32524 (clade), 40674 (class), 32525 (clade), 9347 (clade), 1437010 (clade), 314146 (superorder), 314147 (clade), 9989 (order), 1963758 (sub…			SUBUNIT: By contrast to classical cadherins, homodimerization in trans is not mediated by cadherin EC1 domain strand-swapping, but instead through a homophilic adhesive interface which joins two elongated EC1-EC2 domains through a region near their Ca2+-binding sites to form a tetrahedral, X-like shape. {ECO:0000269|PubMed:20190755}.
Q9WUB3	-0.582729	31.5527	-4.30148	0.00228433	0.0275142	-1.61757	reviewed	PYGM_MOUSE	Glycogen phosphorylase, muscle form (EC 2.4.1.1) (Myophosphorylase)	Pygm	842	glycogen catabolic process [GO:0005980]	Z disc [GO:0030018]	glycogen phosphorylase activity [GO:0008184]; maltodextrin phosphorylase activity [GO:0031220]; nucleotide binding [GO:0000166]; pyridoxal phosphate binding [GO:0030170]	Z disc [GO:0030018]; glycogen phosphorylase activity [GO:0008184]; maltodextrin phosphorylase activity [GO:0031220]; nucleotide binding [GO:0000166]; pyridoxal phosphate binding [GO:0030170]; glycogen catabolic process [GO:0005980]	GO:0000166; GO:0005980; GO:0008184; GO:0030018; GO:0030170; GO:0031220		BINDING 43; /ligand=AMP; /ligand_id=ChEBI:CHEBI:456215; /evidence=ECO:0000250|UniProtKB:P11217; BINDING 76; /ligand=AMP; /ligand_id=ChEBI:CHEBI:456215; /evidence=ECO:0000250|UniProtKB:P11217; BINDING 310..319; /ligand=AMP; /ligand_id=ChEBI:CHEBI:456215; /evidence=ECO:0000250|UniProtKB:P11217	cellular organisms (no rank), Eukaryota (superkingdom), Opisthokonta (clade), Metazoa (kingdom), Eumetazoa (clade), Bilateria (clade), Deuterostomia (clade), Chordata (phylum), Craniata (subphylum), Vertebrata (clade), Gnathostomata (clade), Teleostomi (clade), Euteleostomi (clade), Sarcopterygii (superclass), Dipnotetrapodomorpha (clade), Tetrapoda (clade), Amniota (clade), Mammalia (class), The…	131567 (no rank), 2759 (superkingdom), 33154 (clade), 33208 (kingdom), 6072 (clade), 33213 (clade), 33511 (clade), 7711 (phylum), 89593 (subphylum), 7742 (clade), 7776 (clade), 117570 (clade), 117571 (clade), 8287 (superclass), 1338369 (clade), 32523 (clade), 32524 (clade), 40674 (class), 32525 (clade), 9347 (clade), 1437010 (clade), 314146 (superorder), 314147 (clade), 9989 (order), 1963758 (sub…	PTM: Phosphorylation of Ser-15 converts phosphorylase B (unphosphorylated) to phosphorylase A. {ECO:0000250|UniProtKB:P11217}.		SUBUNIT: Homodimer. Homotetramer; to form the enzymatically active phosphorylase A. {ECO:0000250|UniProtKB:P11217}.
Q9WUZ5	2.94553	22.2868	10.0272	5.48181e-06	0.00109529	4.65881	reviewed	TNNI1_MOUSE	Troponin I, slow skeletal muscle (Troponin I, slow-twitch isoform)	Tnni1	187	transition between fast and slow fiber [GO:0014883]; ventricular cardiac muscle tissue morphogenesis [GO:0055010]	troponin complex [GO:0005861]	actin binding [GO:0003779]	troponin complex [GO:0005861]; actin binding [GO:0003779]; transition between fast and slow fiber [GO:0014883]; ventricular cardiac muscle tissue morphogenesis [GO:0055010]	GO:0003779; GO:0005861; GO:0014883; GO:0055010			cellular organisms (no rank), Eukaryota (superkingdom), Opisthokonta (clade), Metazoa (kingdom), Eumetazoa (clade), Bilateria (clade), Deuterostomia (clade), Chordata (phylum), Craniata (subphylum), Vertebrata (clade), Gnathostomata (clade), Teleostomi (clade), Euteleostomi (clade), Sarcopterygii (superclass), Dipnotetrapodomorpha (clade), Tetrapoda (clade), Amniota (clade), Mammalia (class), The…	131567 (no rank), 2759 (superkingdom), 33154 (clade), 33208 (kingdom), 6072 (clade), 33213 (clade), 33511 (clade), 7711 (phylum), 89593 (subphylum), 7742 (clade), 7776 (clade), 117570 (clade), 117571 (clade), 8287 (superclass), 1338369 (clade), 32523 (clade), 32524 (clade), 40674 (class), 32525 (clade), 9347 (clade), 1437010 (clade), 314146 (superorder), 314147 (clade), 9989 (order), 1963758 (sub…			SUBUNIT: Binds to actin and tropomyosin.
Q9WV06	3.9106	23.2205	12.6042	8.81978e-07	0.000355878	6.46167	reviewed	ANKR2_MOUSE	Ankyrin repeat domain-containing protein 2 (Skeletal muscle ankyrin repeat protein) (mArpp)	Ankrd2 Arpp	328	myotube differentiation [GO:0014902]; negative regulation of myoblast differentiation [GO:0045662]; negative regulation of myotube differentiation [GO:0010832]; negative regulation of transcription by RNA polymerase II [GO:0000122]; regulation of cytokine production [GO:0001817]; regulation of intrinsic apoptotic signaling pathway by p53 class mediator [GO:1902253]; regulation of myoblast prolife…	cytosol [GO:0005829]; euchromatin [GO:0000791]; I band [GO:0031674]; myofibril [GO:0030016]; nucleus [GO:0005634]; PML body [GO:0016605]; sarcomere [GO:0030017]; sarcoplasm [GO:0016528]	chromatin binding [GO:0003682]; protein kinase B binding [GO:0043422]; RNA polymerase II-specific DNA-binding transcription factor binding [GO:0061629]; titin binding [GO:0031432]	cytosol [GO:0005829]; euchromatin [GO:0000791]; I band [GO:0031674]; myofibril [GO:0030016]; nucleus [GO:0005634]; PML body [GO:0016605]; sarcomere [GO:0030017]; sarcoplasm [GO:0016528]; chromatin binding [GO:0003682]; protein kinase B binding [GO:0043422]; RNA polymerase II-specific DNA-binding transcription factor binding [GO:0061629]; titin binding [GO:0031432]; myotube differentiation [GO:001…	GO:0000122; GO:0000791; GO:0001817; GO:0003682; GO:0005634; GO:0005829; GO:0006357; GO:0010832; GO:0014902; GO:0016528; GO:0016605; GO:0030016; GO:0030017; GO:0031432; GO:0031674; GO:0035914; GO:0035994; GO:0043422; GO:0045662; GO:0061629; GO:1902253; GO:2000291			cellular organisms (no rank), Eukaryota (superkingdom), Opisthokonta (clade), Metazoa (kingdom), Eumetazoa (clade), Bilateria (clade), Deuterostomia (clade), Chordata (phylum), Craniata (subphylum), Vertebrata (clade), Gnathostomata (clade), Teleostomi (clade), Euteleostomi (clade), Sarcopterygii (superclass), Dipnotetrapodomorpha (clade), Tetrapoda (clade), Amniota (clade), Mammalia (class), The…	131567 (no rank), 2759 (superkingdom), 33154 (clade), 33208 (kingdom), 6072 (clade), 33213 (clade), 33511 (clade), 7711 (phylum), 89593 (subphylum), 7742 (clade), 7776 (clade), 117570 (clade), 117571 (clade), 8287 (superclass), 1338369 (clade), 32523 (clade), 32524 (clade), 40674 (class), 32525 (clade), 9347 (clade), 1437010 (clade), 314146 (superorder), 314147 (clade), 9989 (order), 1963758 (sub…	PTM: Phosphorylation at Ser-68 by PKB/AKT2 in response to oxidative stress induces translocation to the nucleus and negatively regulates myoblast differentiation. {ECO:0000250}.	P41133	SUBUNIT: Interacts with ID3; both proteins cooperate in myoblast differentiation. Interacts with TTN/titin (By similarity). Interacts (via ANK repeats) with TCAP; the interaction is direct (By similarity). Interacts with TJP1 (via PDZ domains) (By similarity). Interacts with PML; the interaction is direct (By similarity). Interacts with p53/TP53 (By similarity). Interacts with YBX1 (By similarity…
Q9Z1N5	1.13362	20.5015	5.75769	0.000343299	0.00929486	0.374599	reviewed	DX39B_MOUSE	Spliceosome RNA helicase Ddx39b (EC 3.6.4.13) (56 kDa U2AF65-associated protein) (DEAD box protein UAP56) (HLA-B-associated transcript 1 protein)	Ddx39b Bat1 Bat1a Uap56	428	mRNA export from nucleus [GO:0006406]; spliceosomal complex assembly [GO:0000245]	cytoplasm [GO:0005737]; nuclear speck [GO:0016607]; spliceosomal complex [GO:0005681]; transcription export complex [GO:0000346]; U4 snRNP [GO:0005687]; U6 snRNP [GO:0005688]	ATP binding [GO:0005524]; ATP hydrolysis activity [GO:0016887]; ATP-dependent protein binding [GO:0043008]; identical protein binding [GO:0042802]; RNA helicase activity [GO:0003724]; U4 snRNA binding [GO:0030621]; U6 snRNA binding [GO:0017070]	cytoplasm [GO:0005737]; nuclear speck [GO:0016607]; spliceosomal complex [GO:0005681]; transcription export complex [GO:0000346]; U4 snRNP [GO:0005687]; U6 snRNP [GO:0005688]; ATP binding [GO:0005524]; ATP hydrolysis activity [GO:0016887]; ATP-dependent protein binding [GO:0043008]; identical protein binding [GO:0042802]; RNA helicase activity [GO:0003724]; U4 snRNA binding [GO:0030621]; U6 snRNA…	GO:0000245; GO:0000346; GO:0003724; GO:0005524; GO:0005681; GO:0005687; GO:0005688; GO:0005737; GO:0006406; GO:0016607; GO:0016887; GO:0017070; GO:0030621; GO:0042802; GO:0043008		BINDING 89..96; /ligand=ATP; /ligand_id=ChEBI:CHEBI:30616; /evidence=ECO:0000255|PROSITE-ProRule:PRU00541	cellular organisms (no rank), Eukaryota (superkingdom), Opisthokonta (clade), Metazoa (kingdom), Eumetazoa (clade), Bilateria (clade), Deuterostomia (clade), Chordata (phylum), Craniata (subphylum), Vertebrata (clade), Gnathostomata (clade), Teleostomi (clade), Euteleostomi (clade), Sarcopterygii (superclass), Dipnotetrapodomorpha (clade), Tetrapoda (clade), Amniota (clade), Mammalia (class), The…	131567 (no rank), 2759 (superkingdom), 33154 (clade), 33208 (kingdom), 6072 (clade), 33213 (clade), 33511 (clade), 7711 (phylum), 89593 (subphylum), 7742 (clade), 7776 (clade), 117570 (clade), 117571 (clade), 8287 (superclass), 1338369 (clade), 32523 (clade), 32524 (clade), 40674 (class), 32525 (clade), 9347 (clade), 1437010 (clade), 314146 (superorder), 314147 (clade), 9989 (order), 1963758 (sub…			SUBUNIT: Homodimer, and heterodimer with DDX39A. DDX39B interacts with the THO subcomplex to form the THO-DDX39B complex which multimerizes into a 28-subunit tetrameric assembly. Component of the transcription/export (TREX) complex at least composed of ALYREF/THOC4, DDX39B, SARNP/CIP29, CHTOP and the THO subcomplex; in the complex interacts with THOC2. THOC1-THOC2-THOC3-DDX39B subcomplex is suffi…
Q9Z2I9	-0.49247	27.516	-3.45425	0.00791457	0.048023	-2.91166	reviewed	SUCB1_MOUSE	Succinate--CoA ligase [ADP-forming] subunit beta, mitochondrial (EC 6.2.1.5) (ATP-specific succinyl-CoA synthetase subunit beta) (A-SCS) (Succinyl-CoA synthetase beta-A chain) (SCS-betaA)	Sucla2	463	succinate metabolic process [GO:0006105]; succinyl-CoA metabolic process [GO:0006104]; tricarboxylic acid cycle [GO:0006099]	mitochondrion [GO:0005739]; myelin sheath [GO:0043209]	ATP binding [GO:0005524]; magnesium ion binding [GO:0000287]; succinate-CoA ligase (ADP-forming) activity [GO:0004775]; succinate-CoA ligase activity [GO:0004774]	mitochondrion [GO:0005739]; myelin sheath [GO:0043209]; ATP binding [GO:0005524]; magnesium ion binding [GO:0000287]; succinate-CoA ligase (ADP-forming) activity [GO:0004775]; succinate-CoA ligase activity [GO:0004774]; succinate metabolic process [GO:0006105]; succinyl-CoA metabolic process [GO:0006104]; tricarboxylic acid cycle [GO:0006099]	GO:0000287; GO:0004774; GO:0004775; GO:0005524; GO:0005739; GO:0006099; GO:0006104; GO:0006105; GO:0043209		BINDING 98; /ligand=ATP; /ligand_id=ChEBI:CHEBI:30616; /evidence=ECO:0000255|HAMAP-Rule:MF_03220; BINDING 105..107; /ligand=ATP; /ligand_id=ChEBI:CHEBI:30616; /evidence=ECO:0000255|HAMAP-Rule:MF_03220; BINDING 258; /ligand=Mg(2+); /ligand_id=ChEBI:CHEBI:18420; /evidence=ECO:0000255|HAMAP-Rule:MF_03220; BINDING 272; /ligand=Mg(2+); /ligand_id=ChEBI:CHEBI:18420; /evidence=ECO:0000255|HAMAP-Rule:MF_…	cellular organisms (no rank), Eukaryota (superkingdom), Opisthokonta (clade), Metazoa (kingdom), Eumetazoa (clade), Bilateria (clade), Deuterostomia (clade), Chordata (phylum), Craniata (subphylum), Vertebrata (clade), Gnathostomata (clade), Teleostomi (clade), Euteleostomi (clade), Sarcopterygii (superclass), Dipnotetrapodomorpha (clade), Tetrapoda (clade), Amniota (clade), Mammalia (class), The…	131567 (no rank), 2759 (superkingdom), 33154 (clade), 33208 (kingdom), 6072 (clade), 33213 (clade), 33511 (clade), 7711 (phylum), 89593 (subphylum), 7742 (clade), 7776 (clade), 117570 (clade), 117571 (clade), 8287 (superclass), 1338369 (clade), 32523 (clade), 32524 (clade), 40674 (class), 32525 (clade), 9347 (clade), 1437010 (clade), 314146 (superorder), 314147 (clade), 9989 (order), 1963758 (sub…			SUBUNIT: Heterodimer of an alpha and a beta subunit. The beta subunit determines specificity for ATP. Interacts with ALAS2 (By similarity). {ECO:0000250|UniProtKB:Q9P2R7, ECO:0000255|HAMAP-Rule:MF_03220}.
