# Supplementary material for: Knock-in Mouse Model of Hereditary Myopathy with Early Respiratory Failure Carrying the Titin Variant Corresponding to Human p.N31786K
Source: Research Square preprint supplement (doi:10.21203/rs.3.rs-8910535/v1), 2026-02-23
Supplement: Supplementary file 2 [file 716ae54d44918bc46a30f578.xlsx]

## Sheet: Sheet1
Gene	prot_regulation	logFC_prot	rna_regulation	logFC_rna	accession	Reviewed	Entry.Name	Protein.names	Length	Gene.Ontology..biological.process.	Gene.Ontology..cellular.component.	Gene.Ontology..molecular.function.	Gene.Ontology..GO.	Gene.Ontology.IDs	Active.site	Binding.site	Taxonomic.lineage	Taxonomic.lineage..Ids.	Post.translational.modification	Interacts.with	Subunit.structure
Klhl41	Up	0.882249	Up	1.12882	A2AUC9	reviewed	KLH41_MOUSE	Kelch-like protein 41 (Kelch repeat and BTB domain-containing protein 10)	606	myofibril assembly [GO:0030239]; protein ubiquitination [GO:0016567]; pseudopodium assembly [GO:0031269]; regulation of myoblast differentiation [GO:0045661]; regulation of myoblast proliferation [GO:2000291]; regulation of skeletal muscle cell differentiation [GO:2001014]; skeletal muscle cell differentiation [GO:0035914]	Cul3-RING ubiquitin ligase complex [GO:0031463]; cytoplasm [GO:0005737]; cytoskeleton [GO:0005856]; cytosol [GO:0005829]; endoplasmic reticulum membrane [GO:0005789]; M band [GO:0031430]; nucleoplasm [GO:0005654]; plasma membrane [GO:0005886]; pseudopodium [GO:0031143]; ruffle [GO:0001726]; sarcoplasmic reticulum membrane [GO:0033017]		Cul3-RING ubiquitin ligase complex [GO:0031463]; cytoplasm [GO:0005737]; cytoskeleton [GO:0005856]; cytosol [GO:0005829]; endoplasmic reticulum membrane [GO:0005789]; M band [GO:0031430]; nucleoplasm [GO:0005654]; plasma membrane [GO:0005886]; pseudopodium [GO:0031143]; ruffle [GO:0001726]; sarcoplasmic reticulum membrane [GO:0033017]; myofibril assembly [GO:0030239]; protein ubiquitination [GO:0…	GO:0001726; GO:0005654; GO:0005737; GO:0005789; GO:0005829; GO:0005856; GO:0005886; GO:0016567; GO:0030239; GO:0031143; GO:0031269; GO:0031430; GO:0031463; GO:0033017; GO:0035914; GO:0045661; GO:2000291; GO:2001014			cellular organisms (no rank), Eukaryota (superkingdom), Opisthokonta (clade), Metazoa (kingdom), Eumetazoa (clade), Bilateria (clade), Deuterostomia (clade), Chordata (phylum), Craniata (subphylum), Vertebrata (clade), Gnathostomata (clade), Teleostomi (clade), Euteleostomi (clade), Sarcopterygii (superclass), Dipnotetrapodomorpha (clade), Tetrapoda (clade), Amniota (clade), Mammalia (class), The…	131567 (no rank), 2759 (superkingdom), 33154 (clade), 33208 (kingdom), 6072 (clade), 33213 (clade), 33511 (clade), 7711 (phylum), 89593 (subphylum), 7742 (clade), 7776 (clade), 117570 (clade), 117571 (clade), 8287 (superclass), 1338369 (clade), 32523 (clade), 32524 (clade), 40674 (class), 32525 (clade), 9347 (clade), 1437010 (clade), 314146 (superorder), 314147 (clade), 9989 (order), 1963758 (sub…	PTM: Ubiquitinated by E3 ubiquitin ligase complex formed by CUL3 and RBX1 and probably targeted for proteasome-independent degradation. Quinone-induced oxidative stress increases its ubiquitination. {ECO:0000250|UniProtKB:O60662}.		SUBUNIT: Interacts with NRAP. Part of a complex that contains CUL3, RBX1 and KLHL41. Interacts with LASP1. {ECO:0000250|UniProtKB:O60662, ECO:0000250|UniProtKB:Q9ER30}.
Psmb1	Up	0.555762	Up	0.719209	O09061	reviewed	PSB1_MOUSE	Proteasome subunit beta type-1 (Macropain subunit C5) (Multicatalytic endopeptidase complex subunit C5) (Proteasome component C5) (Proteasome gamma chain) (Proteasome subunit beta-6) (beta-6)	240	proteolysis involved in protein catabolic process [GO:0051603]	cytosol [GO:0005829]; nucleoplasm [GO:0005654]; proteasome core complex [GO:0005839]; proteasome core complex, beta-subunit complex [GO:0019774]		cytosol [GO:0005829]; nucleoplasm [GO:0005654]; proteasome core complex [GO:0005839]; proteasome core complex, beta-subunit complex [GO:0019774]; proteolysis involved in protein catabolic process [GO:0051603]	GO:0005654; GO:0005829; GO:0005839; GO:0019774; GO:0051603			cellular organisms (no rank), Eukaryota (superkingdom), Opisthokonta (clade), Metazoa (kingdom), Eumetazoa (clade), Bilateria (clade), Deuterostomia (clade), Chordata (phylum), Craniata (subphylum), Vertebrata (clade), Gnathostomata (clade), Teleostomi (clade), Euteleostomi (clade), Sarcopterygii (superclass), Dipnotetrapodomorpha (clade), Tetrapoda (clade), Amniota (clade), Mammalia (class), The…	131567 (no rank), 2759 (superkingdom), 33154 (clade), 33208 (kingdom), 6072 (clade), 33213 (clade), 33511 (clade), 7711 (phylum), 89593 (subphylum), 7742 (clade), 7776 (clade), 117570 (clade), 117571 (clade), 8287 (superclass), 1338369 (clade), 32523 (clade), 32524 (clade), 40674 (class), 32525 (clade), 9347 (clade), 1437010 (clade), 314146 (superorder), 314147 (clade), 9989 (order), 1963758 (sub…			SUBUNIT: The 26S proteasome consists of a 20S proteasome core and two 19S regulatory subunits. The 20S proteasome core is a barrel-shaped complex made of 28 subunits that are arranged in four stacked rings. The two outer rings are each formed by seven alpha subunits, and the two inner rings are formed by seven beta subunits. The proteolytic activity is exerted by three beta-subunits PSMB5, PSMB6 …
Pdlim3	Up	1.45082	Up	1.0224	O70209	reviewed	PDLI3_MOUSE	PDZ and LIM domain protein 3 (Actinin-associated LIM protein) (Alpha-actinin-2-associated LIM protein)	316	actin filament organization [GO:0007015]; heart development [GO:0007507]	actin cytoskeleton [GO:0015629]; Z disc [GO:0030018]	cytoskeletal protein binding [GO:0008092]; metal ion binding [GO:0046872]; structural constituent of muscle [GO:0008307]	actin cytoskeleton [GO:0015629]; Z disc [GO:0030018]; cytoskeletal protein binding [GO:0008092]; metal ion binding [GO:0046872]; structural constituent of muscle [GO:0008307]; actin filament organization [GO:0007015]; heart development [GO:0007507]	GO:0007015; GO:0007507; GO:0008092; GO:0008307; GO:0015629; GO:0030018; GO:0046872			cellular organisms (no rank), Eukaryota (superkingdom), Opisthokonta (clade), Metazoa (kingdom), Eumetazoa (clade), Bilateria (clade), Deuterostomia (clade), Chordata (phylum), Craniata (subphylum), Vertebrata (clade), Gnathostomata (clade), Teleostomi (clade), Euteleostomi (clade), Sarcopterygii (superclass), Dipnotetrapodomorpha (clade), Tetrapoda (clade), Amniota (clade), Mammalia (class), The…	131567 (no rank), 2759 (superkingdom), 33154 (clade), 33208 (kingdom), 6072 (clade), 33213 (clade), 33511 (clade), 7711 (phylum), 89593 (subphylum), 7742 (clade), 7776 (clade), 117570 (clade), 117571 (clade), 8287 (superclass), 1338369 (clade), 32523 (clade), 32524 (clade), 40674 (class), 32525 (clade), 9347 (clade), 1437010 (clade), 314146 (superorder), 314147 (clade), 9989 (order), 1963758 (sub…			SUBUNIT: Interacts with ACTN2 (By similarity). Forms a heterodimer with PDLIM4 (via LIM domain) (PubMed:15663004). {ECO:0000250|UniProtKB:Q66HS7, ECO:0000269|PubMed:15663004}.
Xirp1	Up	3.32232	Up	0.675287	O70373	reviewed	XIRP1_MOUSE	Xin actin-binding repeat-containing protein 1 (Cardiomyopathy-associated protein 1)	1129	cardiac muscle cell development [GO:0055013]; heart morphogenesis [GO:0003007]; myoblast differentiation involved in skeletal muscle regeneration [GO:0014835]; negative regulation of cell population proliferation [GO:0008285]; Notch signaling pathway [GO:0007219]; protein localization [GO:0008104]; regulation of membrane potential [GO:0042391]; sarcomere organization [GO:0045214]; satellite cell …	adherens junction [GO:0005912]; desmosome [GO:0030057]; fascia adherens [GO:0005916]; intercalated disc [GO:0014704]	actin binding [GO:0003779]; filamin binding [GO:0031005]	adherens junction [GO:0005912]; desmosome [GO:0030057]; fascia adherens [GO:0005916]; intercalated disc [GO:0014704]; actin binding [GO:0003779]; filamin binding [GO:0031005]; cardiac muscle cell development [GO:0055013]; heart morphogenesis [GO:0003007]; myoblast differentiation involved in skeletal muscle regeneration [GO:0014835]; negative regulation of cell population proliferation [GO:000828…	GO:0003007; GO:0003779; GO:0005912; GO:0005916; GO:0007219; GO:0008104; GO:0008285; GO:0014704; GO:0014835; GO:0014901; GO:0030057; GO:0031005; GO:0042391; GO:0045214; GO:0055013			cellular organisms (no rank), Eukaryota (superkingdom), Opisthokonta (clade), Metazoa (kingdom), Eumetazoa (clade), Bilateria (clade), Deuterostomia (clade), Chordata (phylum), Craniata (subphylum), Vertebrata (clade), Gnathostomata (clade), Teleostomi (clade), Euteleostomi (clade), Sarcopterygii (superclass), Dipnotetrapodomorpha (clade), Tetrapoda (clade), Amniota (clade), Mammalia (class), The…	131567 (no rank), 2759 (superkingdom), 33154 (clade), 33208 (kingdom), 6072 (clade), 33213 (clade), 33511 (clade), 7711 (phylum), 89593 (subphylum), 7742 (clade), 7776 (clade), 117570 (clade), 117571 (clade), 8287 (superclass), 1338369 (clade), 32523 (clade), 32524 (clade), 40674 (class), 32525 (clade), 9347 (clade), 1437010 (clade), 314146 (superorder), 314147 (clade), 9989 (order), 1963758 (sub…			SUBUNIT: Interacts (via N-terminus) with CTTN; the interaction promotes CTTN localization to intercalated disks in cardiomyocytes (PubMed:23296090). Interacts with CTNNB1 (PubMed:17925400). Interacts with FLNC and VASP (By similarity). Interacts with F-actin (PubMed:17925400). {ECO:0000250|UniProtKB:Q702N8, ECO:0000269|PubMed:17925400, ECO:0000269|PubMed:23296090}.
Ncl	Up	1.0941	Up	0.552546	P09405	reviewed	NUCL_MOUSE	Nucleolin (Protein C23)	707	angiogenesis [GO:0001525]; cellular response to epidermal growth factor stimulus [GO:0071364]; cellular response to leukemia inhibitory factor [GO:1990830]; negative regulation of insulin receptor signaling pathway [GO:0046627]; negative regulation of translation [GO:0017148]; positive regulation of transcription by RNA polymerase II [GO:0045944]; positive regulation of transcription of nucleolar…	cell cortex [GO:0005938]; chromosome [GO:0005694]; cornified envelope [GO:0001533]; cytoplasmic ribonucleoprotein granule [GO:0036464]; nucleolus [GO:0005730]; nucleoplasm [GO:0005654]; nucleus [GO:0005634]; ribonucleoprotein complex [GO:1990904]	DNA topoisomerase binding [GO:0044547]; identical protein binding [GO:0042802]; insulin receptor substrate binding [GO:0043560]; mRNA 5'-UTR binding [GO:0048027]; PH domain binding [GO:0042731]; RNA binding [GO:0003723]; telomeric DNA binding [GO:0042162]	cell cortex [GO:0005938]; chromosome [GO:0005694]; cornified envelope [GO:0001533]; cytoplasmic ribonucleoprotein granule [GO:0036464]; nucleolus [GO:0005730]; nucleoplasm [GO:0005654]; nucleus [GO:0005634]; ribonucleoprotein complex [GO:1990904]; DNA topoisomerase binding [GO:0044547]; identical protein binding [GO:0042802]; insulin receptor substrate binding [GO:0043560]; mRNA 5'-UTR binding [G…	GO:0001525; GO:0001533; GO:0003723; GO:0005634; GO:0005654; GO:0005694; GO:0005730; GO:0005938; GO:0017148; GO:0036464; GO:0042162; GO:0042731; GO:0042802; GO:0043560; GO:0044547; GO:0045944; GO:0046627; GO:0048027; GO:0071364; GO:1901838; GO:1990830; GO:1990904			cellular organisms (no rank), Eukaryota (superkingdom), Opisthokonta (clade), Metazoa (kingdom), Eumetazoa (clade), Bilateria (clade), Deuterostomia (clade), Chordata (phylum), Craniata (subphylum), Vertebrata (clade), Gnathostomata (clade), Teleostomi (clade), Euteleostomi (clade), Sarcopterygii (superclass), Dipnotetrapodomorpha (clade), Tetrapoda (clade), Amniota (clade), Mammalia (class), The…	131567 (no rank), 2759 (superkingdom), 33154 (clade), 33208 (kingdom), 6072 (clade), 33213 (clade), 33511 (clade), 7711 (phylum), 89593 (subphylum), 7742 (clade), 7776 (clade), 117570 (clade), 117571 (clade), 8287 (superclass), 1338369 (clade), 32523 (clade), 32524 (clade), 40674 (class), 32525 (clade), 9347 (clade), 1437010 (clade), 314146 (superorder), 314147 (clade), 9989 (order), 1963758 (sub…	PTM: Some glutamate residues are glycylated by TTLL8. This modification occurs exclusively on glutamate residues and results in a glycine chain on the gamma-carboxyl group.; PTM: Symmetrically methylated by PRMT5. {ECO:0000250|UniProtKB:P19338}.	Q9CR42; Q9DC51; P63028	SUBUNIT: Identified in a IGF2BP1-dependent mRNP granule complex containing untranslated mRNAs (By similarity). Component of the SWAP complex that consists of NPM1, NCL/nucleolin, PARP1 and SWAP70 (PubMed:9642267). Component of a complex which is at least composed of HTATSF1/Tat-SF1, the P-TEFb complex components CDK9 and CCNT1, RNA polymerase II, SUPT5H, and NCL/nucleolin (By similarity). Interac…
Myl4	Up	1.77124	Up	3.22688	P09541	reviewed	MYL4_MOUSE	Myosin light chain 4 (MLC1EMB) (Myosin light chain 1, atrial/fetal isoform) (MLC1A)	193		myosin complex [GO:0016459]	calcium ion binding [GO:0005509]	myosin complex [GO:0016459]; calcium ion binding [GO:0005509]	GO:0005509; GO:0016459			cellular organisms (no rank), Eukaryota (superkingdom), Opisthokonta (clade), Metazoa (kingdom), Eumetazoa (clade), Bilateria (clade), Deuterostomia (clade), Chordata (phylum), Craniata (subphylum), Vertebrata (clade), Gnathostomata (clade), Teleostomi (clade), Euteleostomi (clade), Sarcopterygii (superclass), Dipnotetrapodomorpha (clade), Tetrapoda (clade), Amniota (clade), Mammalia (class), The…	131567 (no rank), 2759 (superkingdom), 33154 (clade), 33208 (kingdom), 6072 (clade), 33213 (clade), 33511 (clade), 7711 (phylum), 89593 (subphylum), 7742 (clade), 7776 (clade), 117570 (clade), 117571 (clade), 8287 (superclass), 1338369 (clade), 32523 (clade), 32524 (clade), 40674 (class), 32525 (clade), 9347 (clade), 1437010 (clade), 314146 (superorder), 314147 (clade), 9989 (order), 1963758 (sub…			SUBUNIT: Myosin is a hexamer of 2 heavy chains and 4 light chains.
Eef1a1	Up	0.802036	Up	0.49003	P10126	reviewed	EF1A1_MOUSE	Elongation factor 1-alpha 1 (EF-1-alpha-1) (EC 3.6.5.-) (Elongation factor Tu) (EF-Tu) (Eukaryotic elongation factor 1 A-1) (eEF1A-1)	462	cellular response to epidermal growth factor stimulus [GO:0071364]; positive regulation by host of viral genome replication [GO:0044829]; translational elongation [GO:0006414]	cortical actin cytoskeleton [GO:0030864]; cytoplasm [GO:0005737]; cytosolic ribosome [GO:0022626]; myelin sheath [GO:0043209]; nucleolus [GO:0005730]; nucleus [GO:0005634]; plasma membrane [GO:0005886]; ruffle membrane [GO:0032587]	calmodulin binding [GO:0005516]; GTP binding [GO:0005525]; GTPase activity [GO:0003924]; kinase activator activity [GO:0019209]; molecular adaptor activity [GO:0060090]; protein kinase binding [GO:0019901]; translation elongation factor activity [GO:0003746]; tRNA binding [GO:0000049]	cortical actin cytoskeleton [GO:0030864]; cytoplasm [GO:0005737]; cytosolic ribosome [GO:0022626]; myelin sheath [GO:0043209]; nucleolus [GO:0005730]; nucleus [GO:0005634]; plasma membrane [GO:0005886]; ruffle membrane [GO:0032587]; calmodulin binding [GO:0005516]; GTP binding [GO:0005525]; GTPase activity [GO:0003924]; kinase activator activity [GO:0019209]; molecular adaptor activity [GO:006009…	GO:0000049; GO:0003746; GO:0003924; GO:0005516; GO:0005525; GO:0005634; GO:0005730; GO:0005737; GO:0005886; GO:0006414; GO:0019209; GO:0019901; GO:0022626; GO:0030864; GO:0032587; GO:0043209; GO:0044829; GO:0060090; GO:0071364		BINDING 14..21; /ligand=GTP; /ligand_id=ChEBI:CHEBI:37565; /evidence=ECO:0000250|UniProtKB:P68105; BINDING 153..156; /ligand=GTP; /ligand_id=ChEBI:CHEBI:37565; /evidence=ECO:0000250|UniProtKB:P68105; BINDING 194..196; /ligand=GTP; /ligand_id=ChEBI:CHEBI:37565; /evidence=ECO:0000250|UniProtKB:P68105	cellular organisms (no rank), Eukaryota (superkingdom), Opisthokonta (clade), Metazoa (kingdom), Eumetazoa (clade), Bilateria (clade), Deuterostomia (clade), Chordata (phylum), Craniata (subphylum), Vertebrata (clade), Gnathostomata (clade), Teleostomi (clade), Euteleostomi (clade), Sarcopterygii (superclass), Dipnotetrapodomorpha (clade), Tetrapoda (clade), Amniota (clade), Mammalia (class), The…	131567 (no rank), 2759 (superkingdom), 33154 (clade), 33208 (kingdom), 6072 (clade), 33213 (clade), 33511 (clade), 7711 (phylum), 89593 (subphylum), 7742 (clade), 7776 (clade), 117570 (clade), 117571 (clade), 8287 (superclass), 1338369 (clade), 32523 (clade), 32524 (clade), 40674 (class), 32525 (clade), 9347 (clade), 1437010 (clade), 314146 (superorder), 314147 (clade), 9989 (order), 1963758 (sub…	PTM: ISGylated. {ECO:0000250|UniProtKB:P68104}.; PTM: Phosphorylated by TXK. Phosphorylation by PASK increases translation efficiency. Phosphorylated by ROCK2. Phosphorylation by TGFBR1 inhibits translation elongation. {ECO:0000250|UniProtKB:P68104}.; PTM: Trimethylated at Lys-79 by EEF1AKMT1. Methylated at Lys-165 by EEF1AKMT3, methylation by EEF1AKMT3 is dynamic as well as inducible by stress c…	Q01534	SUBUNIT: Found in a nuclear export complex with XPO5, EEF1A1, Ran and aminoacylated tRNA. Interacts with PARP1. Interacts with KARS1. May interact with ERGIC2. Interacts with IFIT1 (via TPR repeats 4-7) (By similarity). May interact with ERGIC2 (By similarity). Interacts with IFIT1 (via TPR repeats 4-7) (PubMed:19856081). Interacts with DLC1, facilitating distribution to the membrane periphery an…
Hspb1	Up	2.24585	Up	0.844523	P14602	reviewed	HSPB1_MOUSE	Heat shock protein beta-1 (HspB1) (Growth-related 25 kDa protein) (Heat shock 25 kDa protein) (HSP 25) (Heat shock 27 kDa protein) (HSP 27) (p25)	209	anterograde axonal protein transport [GO:0099641]; cellular response to vascular endothelial growth factor stimulus [GO:0035924]; chaperone-mediated protein folding [GO:0061077]; intracellular signal transduction [GO:0035556]; negative regulation of apoptotic signaling pathway [GO:2001234]; negative regulation of oxidative stress-induced intrinsic apoptotic signaling pathway [GO:1902176]; negativ…	axon cytoplasm [GO:1904115]; contractile muscle fiber [GO:0043292]; cornified envelope [GO:0001533]; cytoplasm [GO:0005737]; nucleus [GO:0005634]; plasma membrane [GO:0005886]; proteasome complex [GO:0000502]; spindle [GO:0005819]; Z disc [GO:0030018]	identical protein binding [GO:0042802]; protein folding chaperone [GO:0044183]; protein homodimerization activity [GO:0042803]; protein kinase C binding [GO:0005080]; protein kinase C inhibitor activity [GO:0008426]; RNA polymerase II-specific DNA-binding transcription factor binding [GO:0061629]; ubiquitin binding [GO:0043130]	axon cytoplasm [GO:1904115]; contractile muscle fiber [GO:0043292]; cornified envelope [GO:0001533]; cytoplasm [GO:0005737]; nucleus [GO:0005634]; plasma membrane [GO:0005886]; proteasome complex [GO:0000502]; spindle [GO:0005819]; Z disc [GO:0030018]; identical protein binding [GO:0042802]; protein folding chaperone [GO:0044183]; protein homodimerization activity [GO:0042803]; protein kinase C b…	GO:0000502; GO:0001533; GO:0005080; GO:0005634; GO:0005737; GO:0005819; GO:0005886; GO:0006469; GO:0006986; GO:0008426; GO:0009615; GO:0030018; GO:0032731; GO:0032760; GO:0035556; GO:0035924; GO:0042802; GO:0042803; GO:0043122; GO:0043130; GO:0043292; GO:0043536; GO:0044183; GO:0045766; GO:0048010; GO:0061077; GO:0061629; GO:0099641; GO:1902176; GO:1904115; GO:2001028; GO:2001234			cellular organisms (no rank), Eukaryota (superkingdom), Opisthokonta (clade), Metazoa (kingdom), Eumetazoa (clade), Bilateria (clade), Deuterostomia (clade), Chordata (phylum), Craniata (subphylum), Vertebrata (clade), Gnathostomata (clade), Teleostomi (clade), Euteleostomi (clade), Sarcopterygii (superclass), Dipnotetrapodomorpha (clade), Tetrapoda (clade), Amniota (clade), Mammalia (class), The…	131567 (no rank), 2759 (superkingdom), 33154 (clade), 33208 (kingdom), 6072 (clade), 33213 (clade), 33511 (clade), 7711 (phylum), 89593 (subphylum), 7742 (clade), 7776 (clade), 117570 (clade), 117571 (clade), 8287 (superclass), 1338369 (clade), 32523 (clade), 32524 (clade), 40674 (class), 32525 (clade), 9347 (clade), 1437010 (clade), 314146 (superorder), 314147 (clade), 9989 (order), 1963758 (sub…	PTM: Phosphorylated upon exposure to protein kinase C activators and heat shock (By similarity). Phosphorylation by MAPKAPK2 and MAPKAPK3 in response to stress dissociates HSPB1 from large small heat-shock protein (sHsps) oligomers and impairs its chaperone activity and ability to protect against oxidative stress effectively. Phosphorylation by MAPKAPK5 in response to PKA stimulation induces F-ac…		SUBUNIT: Homooligomer. Homodimer; becomes monomeric upon activation. Heterooligomer; with HSPB6. Associates with alpha- and beta-tubulin (By similarity). Interacts with TGFB1I1 (PubMed:11546764). Interacts with CRYAB (By similarity). Interacts with HSPB8 (PubMed:11342557). Interacts with HSPBAP1 (PubMed:10751411). {ECO:0000250|UniProtKB:P04792, ECO:0000269|PubMed:10751411, ECO:0000269|PubMed:1134…
Glul	Up	2.25454	Up	3.02472	P15105	reviewed	GLNA_MOUSE	Glutamine synthetase (GS) (EC 6.3.1.2) (Glutamate--ammonia ligase) (Palmitoyltransferase GLUL) (EC 2.3.1.225)	373	angiogenesis [GO:0001525]; cell population proliferation [GO:0008283]; cellular response to starvation [GO:0009267]; glutamine biosynthetic process [GO:0006542]; intracellular ammonium homeostasis [GO:0097275]; positive regulation of erythrocyte differentiation [GO:0045648]; protein palmitoylation [GO:0018345]; regulation of endothelial cell migration [GO:0010594]; regulation of protein localizat…	cell body [GO:0044297]; cytoplasm [GO:0005737]; cytosol [GO:0005829]; endoplasmic reticulum [GO:0005783]; glial cell projection [GO:0097386]; mitochondrion [GO:0005739]; myelin sheath [GO:0043209]; plasma membrane [GO:0005886]	ATP binding [GO:0005524]; glutamine synthetase activity [GO:0004356]; identical protein binding [GO:0042802]; metal ion binding [GO:0046872]; protein-cysteine S-palmitoyltransferase activity [GO:0019706]	cell body [GO:0044297]; cytoplasm [GO:0005737]; cytosol [GO:0005829]; endoplasmic reticulum [GO:0005783]; glial cell projection [GO:0097386]; mitochondrion [GO:0005739]; myelin sheath [GO:0043209]; plasma membrane [GO:0005886]; ATP binding [GO:0005524]; glutamine synthetase activity [GO:0004356]; identical protein binding [GO:0042802]; metal ion binding [GO:0046872]; protein-cysteine S-palmitoylt…	GO:0001525; GO:0004356; GO:0005524; GO:0005737; GO:0005739; GO:0005783; GO:0005829; GO:0005886; GO:0006542; GO:0008283; GO:0009267; GO:0009749; GO:0010594; GO:0018345; GO:0019706; GO:0042254; GO:0042802; GO:0043209; GO:0044297; GO:0045648; GO:0046872; GO:0097275; GO:0097386; GO:1903670; GO:1904749		BINDING 134; /ligand=ATP; /ligand_id=ChEBI:CHEBI:30616; /evidence=ECO:0000250|UniProtKB:P15104; BINDING 134; /ligand=Mn(2+); /ligand_id=ChEBI:CHEBI:29035; /ligand_label=1; /evidence=ECO:0000250|UniProtKB:P15104; BINDING 136; /ligand=Mn(2+); /ligand_id=ChEBI:CHEBI:29035; /ligand_label=2; /evidence=ECO:0000250|UniProtKB:P15104; BINDING 196; /ligand=Mn(2+); /ligand_id=ChEBI:CHEBI:29035; /ligand_labe…	cellular organisms (no rank), Eukaryota (superkingdom), Opisthokonta (clade), Metazoa (kingdom), Eumetazoa (clade), Bilateria (clade), Deuterostomia (clade), Chordata (phylum), Craniata (subphylum), Vertebrata (clade), Gnathostomata (clade), Teleostomi (clade), Euteleostomi (clade), Sarcopterygii (superclass), Dipnotetrapodomorpha (clade), Tetrapoda (clade), Amniota (clade), Mammalia (class), The…	131567 (no rank), 2759 (superkingdom), 33154 (clade), 33208 (kingdom), 6072 (clade), 33213 (clade), 33511 (clade), 7711 (phylum), 89593 (subphylum), 7742 (clade), 7776 (clade), 117570 (clade), 117571 (clade), 8287 (superclass), 1338369 (clade), 32523 (clade), 32524 (clade), 40674 (class), 32525 (clade), 9347 (clade), 1437010 (clade), 314146 (superorder), 314147 (clade), 9989 (order), 1963758 (sub…	PTM: Acetylated by EP300/p300; acetylation is stimulated by increased glutamine levels and promotes ubiquitin-mediated proteasomal degradation. {ECO:0000250|UniProtKB:P15104}.; PTM: Palmitoylated; undergoes autopalmitoylation. {ECO:0000250|UniProtKB:P15104}.; PTM: Ubiquitinated by ZNRF1 (PubMed:20107048). Ubiquitinated by the DCX (DDB1-CUL4-X-box) E3 ubiquitin-protein ligase complex called CRL4(C…		SUBUNIT: Decamer; composed of two pentamers (By similarity). Interacts with PALMD (PubMed:16323283). Interacts with RHOJ (By similarity). Interacts with BEST2; this interaction tethers a fraction of GLUL to the membrane, causing a decrease of cytosolic glutamine synthase (GS) activity and inhibits the chloride channel activity of BEST2 by affecting the gating at the aperture in the absence of int…
H1f2	Up	1.15714	Up	0.497428	P15864	reviewed	H12_MOUSE	Histone H1.2 (H1 VAR.1) (H1c)	212	chromatin organization [GO:0006325]; negative regulation of transcription by RNA polymerase II [GO:0000122]; nucleosome assembly [GO:0006334]; regulation of transcription by RNA polymerase II [GO:0006357]	euchromatin [GO:0000791]; nucleosome [GO:0000786]; nucleus [GO:0005634]	chromatin DNA binding [GO:0031490]; DNA binding [GO:0003677]; structural constituent of chromatin [GO:0030527]	euchromatin [GO:0000791]; nucleosome [GO:0000786]; nucleus [GO:0005634]; chromatin DNA binding [GO:0031490]; DNA binding [GO:0003677]; structural constituent of chromatin [GO:0030527]; chromatin organization [GO:0006325]; negative regulation of transcription by RNA polymerase II [GO:0000122]; nucleosome assembly [GO:0006334]; regulation of transcription by RNA polymerase II [GO:0006357]	GO:0000122; GO:0000786; GO:0000791; GO:0003677; GO:0005634; GO:0006325; GO:0006334; GO:0006357; GO:0030527; GO:0031490			cellular organisms (no rank), Eukaryota (superkingdom), Opisthokonta (clade), Metazoa (kingdom), Eumetazoa (clade), Bilateria (clade), Deuterostomia (clade), Chordata (phylum), Craniata (subphylum), Vertebrata (clade), Gnathostomata (clade), Teleostomi (clade), Euteleostomi (clade), Sarcopterygii (superclass), Dipnotetrapodomorpha (clade), Tetrapoda (clade), Amniota (clade), Mammalia (class), The…	131567 (no rank), 2759 (superkingdom), 33154 (clade), 33208 (kingdom), 6072 (clade), 33213 (clade), 33511 (clade), 7711 (phylum), 89593 (subphylum), 7742 (clade), 7776 (clade), 117570 (clade), 117571 (clade), 8287 (superclass), 1338369 (clade), 32523 (clade), 32524 (clade), 40674 (class), 32525 (clade), 9347 (clade), 1437010 (clade), 314146 (superorder), 314147 (clade), 9989 (order), 1963758 (sub…	PTM: H1 histones are progressively phosphorylated during the cell cycle, becoming maximally phosphorylated during late G2 phase and M phase, and being dephosphorylated sharply thereafter. {ECO:0000250}.; PTM: Crotonylation (Kcr) is specifically present in male germ cells and marks testis-specific genes in post-meiotic cells, including X-linked genes that escape sex chromosome inactivation in hapl…	Q99MD9	SUBUNIT: Interacts with TSC22D1 isoform 2. {ECO:0000250|UniProtKB:P16403}.
Des	Up	0.78425	Up	1.02428	P31001	reviewed	DESM_MOUSE	Desmin	469	intermediate filament organization [GO:0045109]; muscle organ development [GO:0007517]; nuclear envelope organization [GO:0006998]	cardiac myofibril [GO:0097512]; cell tip [GO:0051286]; cell-cell junction [GO:0005911]; contractile muscle fiber [GO:0043292]; cytoplasm [GO:0005737]; cytoskeleton [GO:0005856]; fascia adherens [GO:0005916]; intermediate filament [GO:0005882]; neuromuscular junction [GO:0031594]; nuclear envelope [GO:0005635]; nucleus [GO:0005634]; sarcolemma [GO:0042383]; Z disc [GO:0030018]	cytoskeletal protein binding [GO:0008092]; identical protein binding [GO:0042802]; structural constituent of cytoskeleton [GO:0005200]	cardiac myofibril [GO:0097512]; cell tip [GO:0051286]; cell-cell junction [GO:0005911]; contractile muscle fiber [GO:0043292]; cytoplasm [GO:0005737]; cytoskeleton [GO:0005856]; fascia adherens [GO:0005916]; intermediate filament [GO:0005882]; neuromuscular junction [GO:0031594]; nuclear envelope [GO:0005635]; nucleus [GO:0005634]; sarcolemma [GO:0042383]; Z disc [GO:0030018]; cytoskeletal protei…	GO:0005200; GO:0005634; GO:0005635; GO:0005737; GO:0005856; GO:0005882; GO:0005911; GO:0005916; GO:0006998; GO:0007517; GO:0008092; GO:0030018; GO:0031594; GO:0042383; GO:0042802; GO:0043292; GO:0045109; GO:0051286; GO:0097512			cellular organisms (no rank), Eukaryota (superkingdom), Opisthokonta (clade), Metazoa (kingdom), Eumetazoa (clade), Bilateria (clade), Deuterostomia (clade), Chordata (phylum), Craniata (subphylum), Vertebrata (clade), Gnathostomata (clade), Teleostomi (clade), Euteleostomi (clade), Sarcopterygii (superclass), Dipnotetrapodomorpha (clade), Tetrapoda (clade), Amniota (clade), Mammalia (class), The…	131567 (no rank), 2759 (superkingdom), 33154 (clade), 33208 (kingdom), 6072 (clade), 33213 (clade), 33511 (clade), 7711 (phylum), 89593 (subphylum), 7742 (clade), 7776 (clade), 117570 (clade), 117571 (clade), 8287 (superclass), 1338369 (clade), 32523 (clade), 32524 (clade), 40674 (class), 32525 (clade), 9347 (clade), 1437010 (clade), 314146 (superorder), 314147 (clade), 9989 (order), 1963758 (sub…	PTM: ADP-ribosylation prevents ability to form intermediate filaments. {ECO:0000250|UniProtKB:P48675}.; PTM: Phosphorylation at Ser-7, Ser-28 and Ser-32 by CDK1, phosphorylation at Ser-60 by AURKB and phosphorylation at Thr-76 by ROCK1 contribute to efficient separation of desmin intermediate filaments during mitosis. {ECO:0000269|PubMed:27565725}.; PTM: Ubiquitination by a SCF-like complex conta…	Q9Z2C5; Q9UBX2; Q13496	SUBUNIT: Homomer (By similarity). Interacts with MTM1 (By similarity). Interacts with DST (PubMed:10357897). Interacts with tubulin-alpha; specifically associates with detyrosinated tubulin-alpha (PubMed:27102488). Interacts with EPPK1; interaction is dependent of higher-order structure of intermediate filament. Interacts with CRYAB (By similarity). Interacts with NEB (via nebulin repeats 160-164…
Csrp3	Up	5.33831	Up	0.972681	P50462	reviewed	CSRP3_MOUSE	Cysteine and glycine-rich protein 3 (Cysteine-rich protein 3) (CRP3) (LIM domain protein, cardiac) (Muscle LIM protein)	194	cardiac muscle contraction [GO:0060048]; cardiac muscle hypertrophy [GO:0003300]; cardiac muscle tissue development [GO:0048738]; cardiac myofibril assembly [GO:0055003]; detection of muscle stretch [GO:0035995]; glucose homeostasis [GO:0042593]; heart development [GO:0007507]; inflammatory response [GO:0006954]; insulin receptor signaling pathway [GO:0008286]; intracellular calcium ion homeostas…	cytoplasm [GO:0005737]; cytoskeleton [GO:0005856]; cytosol [GO:0005829]; nucleoplasm [GO:0005654]; nucleus [GO:0005634]; Z disc [GO:0030018]	actin binding [GO:0003779]; actinin binding [GO:0042805]; identical protein binding [GO:0042802]; metal ion binding [GO:0046872]; MRF binding [GO:0043426]; RNA polymerase II-specific DNA-binding transcription factor binding [GO:0061629]; structural constituent of muscle [GO:0008307]; telethonin binding [GO:0031433]	cytoplasm [GO:0005737]; cytoskeleton [GO:0005856]; cytosol [GO:0005829]; nucleoplasm [GO:0005654]; nucleus [GO:0005634]; Z disc [GO:0030018]; actin binding [GO:0003779]; actinin binding [GO:0042805]; identical protein binding [GO:0042802]; metal ion binding [GO:0046872]; MRF binding [GO:0043426]; RNA polymerase II-specific DNA-binding transcription factor binding [GO:0061629]; structural constitu…	GO:0002026; GO:0003300; GO:0003779; GO:0005634; GO:0005654; GO:0005737; GO:0005829; GO:0005856; GO:0006874; GO:0006954; GO:0007507; GO:0007517; GO:0008286; GO:0008307; GO:0010831; GO:0030018; GO:0031433; GO:0033292; GO:0033365; GO:0035995; GO:0042593; GO:0042802; GO:0042805; GO:0043426; GO:0045662; GO:0045663; GO:0045944; GO:0046716; GO:0046872; GO:0048738; GO:0055003; GO:0060048; GO:0061629; GO:…			cellular organisms (no rank), Eukaryota (superkingdom), Opisthokonta (clade), Metazoa (kingdom), Eumetazoa (clade), Bilateria (clade), Deuterostomia (clade), Chordata (phylum), Craniata (subphylum), Vertebrata (clade), Gnathostomata (clade), Teleostomi (clade), Euteleostomi (clade), Sarcopterygii (superclass), Dipnotetrapodomorpha (clade), Tetrapoda (clade), Amniota (clade), Mammalia (class), The…	131567 (no rank), 2759 (superkingdom), 33154 (clade), 33208 (kingdom), 6072 (clade), 33213 (clade), 33511 (clade), 7711 (phylum), 89593 (subphylum), 7742 (clade), 7776 (clade), 117570 (clade), 117571 (clade), 8287 (superclass), 1338369 (clade), 32523 (clade), 32524 (clade), 40674 (class), 32525 (clade), 9347 (clade), 1437010 (clade), 314146 (superorder), 314147 (clade), 9989 (order), 1963758 (sub…	PTM: Phosphorylated by PKC/PRKCA. {ECO:0000250|UniProtKB:P50461}.		SUBUNIT: Self-associates. Oligomeric in the cytoplasm and monomeric in the nucleus. Homooligomers preferentially form along the actin cytoskeleton (By similarity). Interacts with TCAP (PubMed:20044516). Interacts with LDHD, MYOD1, MYOG, ACTN2, NRAP, MYF6 (By similarity). Interacts (via N-terminus)D with GLRX3 (via C-terminus) and PPP3CA; GLRX3 and calcineurin compete for interaction with CSRP3 (P…
Hnrnpk	Up	0.69981	Up	0.251907	P61979	reviewed	HNRPK_MOUSE	Heterogeneous nuclear ribonucleoprotein K (hnRNP K)	463	mRNA processing [GO:0006397]; negative regulation of apoptotic process [GO:0043066]; negative regulation of DNA-templated transcription [GO:0045892]; negative regulation of mRNA splicing, via spliceosome [GO:0048025]; positive regulation of receptor-mediated endocytosis [GO:0048260]; positive regulation of transcription by RNA polymerase II [GO:0045944]; random inactivation of X chromosome [GO:00…	anchoring junction [GO:0070161]; catalytic step 2 spliceosome [GO:0071013]; cell projection [GO:0042995]; chromatin [GO:0000785]; cytoplasm [GO:0005737]; cytoplasmic stress granule [GO:0010494]; nucleoplasm [GO:0005654]; nucleus [GO:0005634]; podosome [GO:0002102]; ribonucleoprotein complex [GO:1990904]	DNA binding [GO:0003677]; identical protein binding [GO:0042802]; protein domain specific binding [GO:0019904]; RNA binding [GO:0003723]	anchoring junction [GO:0070161]; catalytic step 2 spliceosome [GO:0071013]; cell projection [GO:0042995]; chromatin [GO:0000785]; cytoplasm [GO:0005737]; cytoplasmic stress granule [GO:0010494]; nucleoplasm [GO:0005654]; nucleus [GO:0005634]; podosome [GO:0002102]; ribonucleoprotein complex [GO:1990904]; DNA binding [GO:0003677]; identical protein binding [GO:0042802]; protein domain specific bin…	GO:0000785; GO:0002102; GO:0003677; GO:0003723; GO:0005634; GO:0005654; GO:0005737; GO:0006397; GO:0008380; GO:0010494; GO:0010988; GO:0019904; GO:0031048; GO:0042802; GO:0042995; GO:0043066; GO:0045892; GO:0045944; GO:0048025; GO:0048260; GO:0060816; GO:0070161; GO:0071013; GO:1902165; GO:1990904			cellular organisms (no rank), Eukaryota (superkingdom), Opisthokonta (clade), Metazoa (kingdom), Eumetazoa (clade), Bilateria (clade), Deuterostomia (clade), Chordata (phylum), Craniata (subphylum), Vertebrata (clade), Gnathostomata (clade), Teleostomi (clade), Euteleostomi (clade), Sarcopterygii (superclass), Dipnotetrapodomorpha (clade), Tetrapoda (clade), Amniota (clade), Mammalia (class), The…	131567 (no rank), 2759 (superkingdom), 33154 (clade), 33208 (kingdom), 6072 (clade), 33213 (clade), 33511 (clade), 7711 (phylum), 89593 (subphylum), 7742 (clade), 7776 (clade), 117570 (clade), 117571 (clade), 8287 (superclass), 1338369 (clade), 32523 (clade), 32524 (clade), 40674 (class), 32525 (clade), 9347 (clade), 1437010 (clade), 314146 (superorder), 314147 (clade), 9989 (order), 1963758 (sub…	PTM: Sumoylated by CBX4. Sumoylation is increased upon DNA damage, such as that produced by doxorubicin, etoposide, UV light and camptothecin, due to enhanced CBX4 phosphorylation by HIPK2 under these conditions (By similarity). {ECO:0000250}.; PTM: Ubiquitinated by MDM2. Doxorubicin treatment does not affect monoubiquitination, but slightly decreases HNRNPK poly-ubiquitination (By similarity). {…		SUBUNIT: Identified in the spliceosome C complex (By similarity). Part of a transcription inhibitory ribonucleoprotein complex composed at least of the circular RNA circZNF827, ZNF827 and HNRNPL (By similarity). Interacts with ANKRD28 and RBM42 (By similarity). Interacts with DDX1 (By similarity). Interacts with MDM2; this interaction leads to ubiquitination and proteasomal degradation (By simila…
Psmc1	Up	0.94075	Up	0.609043	P62192	reviewed	PRS4_MOUSE	26S proteasome regulatory subunit 4 (P26s4) (26S proteasome AAA-ATPase subunit RPT2) (Proteasome 26S subunit ATPase 1)	440		cytosol [GO:0005829]; membrane [GO:0016020]; nucleoplasm [GO:0005654]; proteasome accessory complex [GO:0022624]; proteasome regulatory particle [GO:0005838]	ATP binding [GO:0005524]; ATP hydrolysis activity [GO:0016887]	cytosol [GO:0005829]; membrane [GO:0016020]; nucleoplasm [GO:0005654]; proteasome accessory complex [GO:0022624]; proteasome regulatory particle [GO:0005838]; ATP binding [GO:0005524]; ATP hydrolysis activity [GO:0016887]	GO:0005524; GO:0005654; GO:0005829; GO:0005838; GO:0016020; GO:0016887; GO:0022624		BINDING 226..233; /ligand=ATP; /ligand_id=ChEBI:CHEBI:30616; /evidence=ECO:0000255	cellular organisms (no rank), Eukaryota (superkingdom), Opisthokonta (clade), Metazoa (kingdom), Eumetazoa (clade), Bilateria (clade), Deuterostomia (clade), Chordata (phylum), Craniata (subphylum), Vertebrata (clade), Gnathostomata (clade), Teleostomi (clade), Euteleostomi (clade), Sarcopterygii (superclass), Dipnotetrapodomorpha (clade), Tetrapoda (clade), Amniota (clade), Mammalia (class), The…	131567 (no rank), 2759 (superkingdom), 33154 (clade), 33208 (kingdom), 6072 (clade), 33213 (clade), 33511 (clade), 7711 (phylum), 89593 (subphylum), 7742 (clade), 7776 (clade), 117570 (clade), 117571 (clade), 8287 (superclass), 1338369 (clade), 32523 (clade), 32524 (clade), 40674 (class), 32525 (clade), 9347 (clade), 1437010 (clade), 314146 (superorder), 314147 (clade), 9989 (order), 1963758 (sub…			SUBUNIT: Component of the 19S proteasome regulatory particle complex. The 26S proteasome consists of a 20S core particle (CP) and two 19S regulatory subunits (RP). The regulatory particle is made of a lid composed of 9 subunits, a base containing 6 ATPases including PSMC1 and few additional components. Interacts with SCA7. Interacts with NGLY1. Interacts with PAAF1. {ECO:0000250|UniProtKB:P62191,…
Rpl31	Up	0.522017	Up	0.371435	P62900	reviewed	RL31_MOUSE	Large ribosomal subunit protein eL31 (60S ribosomal protein L31)	125	cytoplasmic translation [GO:0002181]	cytoplasm [GO:0005737]; cytosol [GO:0005829]; cytosolic large ribosomal subunit [GO:0022625]; postsynapse [GO:0098794]; ribosome [GO:0005840]; synapse [GO:0045202]	structural constituent of ribosome [GO:0003735]	cytoplasm [GO:0005737]; cytosol [GO:0005829]; cytosolic large ribosomal subunit [GO:0022625]; postsynapse [GO:0098794]; ribosome [GO:0005840]; synapse [GO:0045202]; structural constituent of ribosome [GO:0003735]; cytoplasmic translation [GO:0002181]	GO:0002181; GO:0003735; GO:0005737; GO:0005829; GO:0005840; GO:0022625; GO:0045202; GO:0098794			cellular organisms (no rank), Eukaryota (superkingdom), Opisthokonta (clade), Metazoa (kingdom), Eumetazoa (clade), Bilateria (clade), Deuterostomia (clade), Chordata (phylum), Craniata (subphylum), Vertebrata (clade), Gnathostomata (clade), Teleostomi (clade), Euteleostomi (clade), Sarcopterygii (superclass), Dipnotetrapodomorpha (clade), Tetrapoda (clade), Amniota (clade), Mammalia (class), The…	131567 (no rank), 2759 (superkingdom), 33154 (clade), 33208 (kingdom), 6072 (clade), 33213 (clade), 33511 (clade), 7711 (phylum), 89593 (subphylum), 7742 (clade), 7776 (clade), 117570 (clade), 117571 (clade), 8287 (superclass), 1338369 (clade), 32523 (clade), 32524 (clade), 40674 (class), 32525 (clade), 9347 (clade), 1437010 (clade), 314146 (superorder), 314147 (clade), 9989 (order), 1963758 (sub…			SUBUNIT: Component of the large ribosomal subunit. {ECO:0000269|PubMed:36517592}.
Hmgb1	Up	1.00395	Up	0.40484	P63158	reviewed	HMGB1_MOUSE	High mobility group protein B1 (High mobility group protein 1) (HMG-1)	215	adaptive immune response [GO:0002250]; apoptotic cell clearance [GO:0043277]; autophagy [GO:0006914]; base-excision repair [GO:0006284]; cellular response to interleukin-7 [GO:0098761]; cellular response to lipopolysaccharide [GO:0071222]; chromatin organization [GO:0006325]; DNA geometric change [GO:0032392]; DNA recombination [GO:0006310]; double-strand break repair [GO:0006302]; endothelial ce…	chromosome [GO:0005694]; cytoplasm [GO:0005737]; early endosome [GO:0005769]; endoplasmic reticulum-Golgi intermediate compartment [GO:0005793]; extracellular region [GO:0005576]; extracellular space [GO:0005615]; neuron projection [GO:0043005]; nucleus [GO:0005634]; plasma membrane [GO:0005886]	bent DNA binding [GO:0003681]; bubble DNA binding [GO:0000405]; calcium-dependent protein kinase regulator activity [GO:0010858]; crossed form four-way junction DNA binding [GO:0000402]; cytokine activity [GO:0005125]; DNA binding, bending [GO:0008301]; double-stranded DNA binding [GO:0003690]; double-stranded RNA binding [GO:0003725]; four-way junction DNA binding [GO:0000400]; heparin binding […	chromosome [GO:0005694]; cytoplasm [GO:0005737]; early endosome [GO:0005769]; endoplasmic reticulum-Golgi intermediate compartment [GO:0005793]; extracellular region [GO:0005576]; extracellular space [GO:0005615]; neuron projection [GO:0043005]; nucleus [GO:0005634]; plasma membrane [GO:0005886]; bent DNA binding [GO:0003681]; bubble DNA binding [GO:0000405]; calcium-dependent protein kinase regu…	GO:0000400; GO:0000401; GO:0000402; GO:0000405; GO:0001654; GO:0001773; GO:0001786; GO:0001935; GO:0002053; GO:0002250; GO:0002270; GO:0002281; GO:0002318; GO:0002643; GO:0002840; GO:0003676; GO:0003681; GO:0003690; GO:0003725; GO:0003727; GO:0005125; GO:0005576; GO:0005615; GO:0005634; GO:0005694; GO:0005737; GO:0005769; GO:0005793; GO:0005886; GO:0005980; GO:0006284; GO:0006302; GO:0006310; GO:…		BINDING 1..10; /ligand=heparin; /ligand_id=ChEBI:CHEBI:28304; /evidence=ECO:0000250|UniProtKB:P10103	cellular organisms (no rank), Eukaryota (superkingdom), Opisthokonta (clade), Metazoa (kingdom), Eumetazoa (clade), Bilateria (clade), Deuterostomia (clade), Chordata (phylum), Craniata (subphylum), Vertebrata (clade), Gnathostomata (clade), Teleostomi (clade), Euteleostomi (clade), Sarcopterygii (superclass), Dipnotetrapodomorpha (clade), Tetrapoda (clade), Amniota (clade), Mammalia (class), The…	131567 (no rank), 2759 (superkingdom), 33154 (clade), 33208 (kingdom), 6072 (clade), 33213 (clade), 33511 (clade), 7711 (phylum), 89593 (subphylum), 7742 (clade), 7776 (clade), 117570 (clade), 117571 (clade), 8287 (superclass), 1338369 (clade), 32523 (clade), 32524 (clade), 40674 (class), 32525 (clade), 9347 (clade), 1437010 (clade), 314146 (superorder), 314147 (clade), 9989 (order), 1963758 (sub…	PTM: Acetylated on multiple sites upon stimulation with LPS (By similarity). Acetylation on lysine residues in the nuclear localization signals (NLS 1 and NLS 2) leads to cytoplasmic localization and subsequent secretion. Acetylation on Lys-3 results in preferential binding to DNA ends and impairs DNA bending activity (By similarity). {ECO:0000250|UniProtKB:P10103, ECO:0000250|UniProtKB:P63159}.;…	O88597; Q8VIM0; Q01860	SUBUNIT: Interacts (fully reduced HMGB1) with CXCL12; probably in a 1:2 ratio involving two molecules of CXCL12, each interacting with one HMG box of HMGB1; inhibited by glycyrrhizin (PubMed:22370717). Associates with the TLR4:LY96 receptor complex (By similarity). Component of the RAG complex composed of core components RAG1 and RAG2, and associated component HMGB1 or HMGB2 (PubMed:9184213). Int…
Sgcd	Up	0.995681	Up	0.485385	P82347	reviewed	SGCD_MOUSE	Delta-sarcoglycan (Delta-SG) (35 kDa dystrophin-associated glycoprotein) (35DAG)	289	calcium ion homeostasis [GO:0055074]; calcium-mediated signaling [GO:0019722]; cardiac muscle cell contraction [GO:0086003]; cardiac muscle cell development [GO:0055013]; cardiac muscle contraction [GO:0060048]; coronary vasculature morphogenesis [GO:0060977]; heart process [GO:0003015]; membrane organization [GO:0061024]; protein-containing complex localization [GO:0031503]	cytoskeleton [GO:0005856]; dystroglycan complex [GO:0016011]; plasma membrane [GO:0005886]; sarcoglycan complex [GO:0016012]; sarcolemma [GO:0042383]; sarcoplasmic reticulum [GO:0016529]		cytoskeleton [GO:0005856]; dystroglycan complex [GO:0016011]; plasma membrane [GO:0005886]; sarcoglycan complex [GO:0016012]; sarcolemma [GO:0042383]; sarcoplasmic reticulum [GO:0016529]; calcium ion homeostasis [GO:0055074]; calcium-mediated signaling [GO:0019722]; cardiac muscle cell contraction [GO:0086003]; cardiac muscle cell development [GO:0055013]; cardiac muscle contraction [GO:0060048];…	GO:0003015; GO:0005856; GO:0005886; GO:0016011; GO:0016012; GO:0016529; GO:0019722; GO:0031503; GO:0042383; GO:0055013; GO:0055074; GO:0060048; GO:0060977; GO:0061024; GO:0086003			cellular organisms (no rank), Eukaryota (superkingdom), Opisthokonta (clade), Metazoa (kingdom), Eumetazoa (clade), Bilateria (clade), Deuterostomia (clade), Chordata (phylum), Craniata (subphylum), Vertebrata (clade), Gnathostomata (clade), Teleostomi (clade), Euteleostomi (clade), Sarcopterygii (superclass), Dipnotetrapodomorpha (clade), Tetrapoda (clade), Amniota (clade), Mammalia (class), The…	131567 (no rank), 2759 (superkingdom), 33154 (clade), 33208 (kingdom), 6072 (clade), 33213 (clade), 33511 (clade), 7711 (phylum), 89593 (subphylum), 7742 (clade), 7776 (clade), 117570 (clade), 117571 (clade), 8287 (superclass), 1338369 (clade), 32523 (clade), 32524 (clade), 40674 (class), 32525 (clade), 9347 (clade), 1437010 (clade), 314146 (superorder), 314147 (clade), 9989 (order), 1963758 (sub…	PTM: Disulfide bonds are present.		SUBUNIT: Interacts with FLNC (By similarity). Cross-link to form 2 major subcomplexes: one consisting of SGCB, SGCD and SGCG and the other consisting of SGCB and SGCD. The association between SGCB and SGCG is particularly strong while SGCA is loosely associated with the other sarcoglycans. Interacts with DAG1. {ECO:0000250, ECO:0000269|PubMed:9864373}.
Pbxip1	Up	1.23137	Up	0.753775	Q3TVI8	reviewed	PBIP1_MOUSE	Pre-B-cell leukemia transcription factor-interacting protein 1 (Hematopoietic PBX-interacting protein)	727	articular cartilage development [GO:0061975]; cell adhesion [GO:0007155]; cell migration [GO:0016477]; extracellular matrix disassembly [GO:0022617]; gene expression [GO:0010467]; gene expression involved in extracellular matrix organization [GO:1901148]; hemopoiesis [GO:0030097]; positive regulation of chondrocyte proliferation [GO:1902732]; positive regulation of DNA-templated transcription [GO…	chromatin [GO:0000785]; cytoplasm [GO:0005737]; cytosol [GO:0005829]; microtubule [GO:0005874]; nucleoplasm [GO:0005654]; nucleus [GO:0005634]; transcription regulator complex [GO:0005667]	DNA-binding transcription factor binding [GO:0140297]; transcription coactivator activity [GO:0003713]; transcription corepressor activity [GO:0003714]	chromatin [GO:0000785]; cytoplasm [GO:0005737]; cytosol [GO:0005829]; microtubule [GO:0005874]; nucleoplasm [GO:0005654]; nucleus [GO:0005634]; transcription regulator complex [GO:0005667]; DNA-binding transcription factor binding [GO:0140297]; transcription coactivator activity [GO:0003713]; transcription corepressor activity [GO:0003714]; articular cartilage development [GO:0061975]; cell adhes…	GO:0000785; GO:0002532; GO:0003713; GO:0003714; GO:0005634; GO:0005654; GO:0005667; GO:0005737; GO:0005829; GO:0005874; GO:0007155; GO:0010467; GO:0016477; GO:0022617; GO:0030097; GO:0030177; GO:0045893; GO:0061975; GO:0140297; GO:1901148; GO:1902732			cellular organisms (no rank), Eukaryota (superkingdom), Opisthokonta (clade), Metazoa (kingdom), Eumetazoa (clade), Bilateria (clade), Deuterostomia (clade), Chordata (phylum), Craniata (subphylum), Vertebrata (clade), Gnathostomata (clade), Teleostomi (clade), Euteleostomi (clade), Sarcopterygii (superclass), Dipnotetrapodomorpha (clade), Tetrapoda (clade), Amniota (clade), Mammalia (class), The…	131567 (no rank), 2759 (superkingdom), 33154 (clade), 33208 (kingdom), 6072 (clade), 33213 (clade), 33511 (clade), 7711 (phylum), 89593 (subphylum), 7742 (clade), 7776 (clade), 117570 (clade), 117571 (clade), 8287 (superclass), 1338369 (clade), 32523 (clade), 32524 (clade), 40674 (class), 32525 (clade), 9347 (clade), 1437010 (clade), 314146 (superorder), 314147 (clade), 9989 (order), 1963758 (sub…			SUBUNIT: Interacts with ESR1, PBX1, PBX2 and PBX3 (By similarity). Interacts with TEX11. {ECO:0000250, ECO:0000269|PubMed:22383461}.
Xirp2	Up	6.62486	Up	1.51182	Q4U4S6	reviewed	XIRP2_MOUSE	Xin actin-binding repeat-containing protein 2 (Beta-xin) (Cardiomyopathy-associated protein 3) (Myogenic MEF2-activated Xin-related protein) (Myomaxin) (mXinbeta)	3784	actin cytoskeleton organization [GO:0030036]; cardiac muscle tissue morphogenesis [GO:0055008]; cell-cell junction organization [GO:0045216]; positive regulation of protein localization [GO:1903829]; regulation of actin filament organization [GO:0110053]; ventricular septum development [GO:0003281]	cell-cell junction [GO:0005911]; cytosol [GO:0005829]; focal adhesion [GO:0005925]; stress fiber [GO:0001725]; Z disc [GO:0030018]	actin filament binding [GO:0051015]; alpha-actinin binding [GO:0051393]; metal ion binding [GO:0046872]	cell-cell junction [GO:0005911]; cytosol [GO:0005829]; focal adhesion [GO:0005925]; stress fiber [GO:0001725]; Z disc [GO:0030018]; actin filament binding [GO:0051015]; alpha-actinin binding [GO:0051393]; metal ion binding [GO:0046872]; actin cytoskeleton organization [GO:0030036]; cardiac muscle tissue morphogenesis [GO:0055008]; cell-cell junction organization [GO:0045216]; positive regulation …	GO:0001725; GO:0003281; GO:0005829; GO:0005911; GO:0005925; GO:0030018; GO:0030036; GO:0045216; GO:0046872; GO:0051015; GO:0051393; GO:0055008; GO:0110053; GO:1903829			cellular organisms (no rank), Eukaryota (superkingdom), Opisthokonta (clade), Metazoa (kingdom), Eumetazoa (clade), Bilateria (clade), Deuterostomia (clade), Chordata (phylum), Craniata (subphylum), Vertebrata (clade), Gnathostomata (clade), Teleostomi (clade), Euteleostomi (clade), Sarcopterygii (superclass), Dipnotetrapodomorpha (clade), Tetrapoda (clade), Amniota (clade), Mammalia (class), The…	131567 (no rank), 2759 (superkingdom), 33154 (clade), 33208 (kingdom), 6072 (clade), 33213 (clade), 33511 (clade), 7711 (phylum), 89593 (subphylum), 7742 (clade), 7776 (clade), 117570 (clade), 117571 (clade), 8287 (superclass), 1338369 (clade), 32523 (clade), 32524 (clade), 40674 (class), 32525 (clade), 9347 (clade), 1437010 (clade), 314146 (superorder), 314147 (clade), 9989 (order), 1963758 (sub…		Q61762; Q9JJV9	SUBUNIT: Interacts with ACTN2 (PubMed:17046827). Interacts with F-actin (By similarity). Interacts with NEBL (via SH3 domain) (By similarity). Interacts with Kcna5/Kv1.5 and Scn5a/Nav1.5; the interactions are required for normal action potential configuration in the heart (PubMed:29306897). {ECO:0000250|UniProtKB:A4UGR9, ECO:0000269|PubMed:17046827, ECO:0000269|PubMed:29306897}.; SUBUNIT: [Isofor…
Psmb6	Up	0.671145	Up	0.251259	Q60692	reviewed	PSB6_MOUSE	Proteasome subunit beta type-6 (EC 3.4.25.1) (Low molecular mass protein 19) (Macropain delta chain) (Multicatalytic endopeptidase complex delta chain) (Proteasome delta chain) (Proteasome subunit Y) (Proteasome subunit beta-1) (beta-1)	238	proteolysis involved in protein catabolic process [GO:0051603]	cytosol [GO:0005829]; mitochondrion [GO:0005739]; nucleoplasm [GO:0005654]; proteasome core complex [GO:0005839]; proteasome core complex, beta-subunit complex [GO:0019774]	threonine-type endopeptidase activity [GO:0004298]	cytosol [GO:0005829]; mitochondrion [GO:0005739]; nucleoplasm [GO:0005654]; proteasome core complex [GO:0005839]; proteasome core complex, beta-subunit complex [GO:0019774]; threonine-type endopeptidase activity [GO:0004298]; proteolysis involved in protein catabolic process [GO:0051603]	GO:0004298; GO:0005654; GO:0005739; GO:0005829; GO:0005839; GO:0019774; GO:0051603	ACT_SITE 34; /note=Nucleophile; /evidence=ECO:0000250|UniProtKB:P28072		cellular organisms (no rank), Eukaryota (superkingdom), Opisthokonta (clade), Metazoa (kingdom), Eumetazoa (clade), Bilateria (clade), Deuterostomia (clade), Chordata (phylum), Craniata (subphylum), Vertebrata (clade), Gnathostomata (clade), Teleostomi (clade), Euteleostomi (clade), Sarcopterygii (superclass), Dipnotetrapodomorpha (clade), Tetrapoda (clade), Amniota (clade), Mammalia (class), The…	131567 (no rank), 2759 (superkingdom), 33154 (clade), 33208 (kingdom), 6072 (clade), 33213 (clade), 33511 (clade), 7711 (phylum), 89593 (subphylum), 7742 (clade), 7776 (clade), 117570 (clade), 117571 (clade), 8287 (superclass), 1338369 (clade), 32523 (clade), 32524 (clade), 40674 (class), 32525 (clade), 9347 (clade), 1437010 (clade), 314146 (superorder), 314147 (clade), 9989 (order), 1963758 (sub…			SUBUNIT: The 26S proteasome consists of a 20S proteasome core and two 19S regulatory subunits. The 20S proteasome core is a barrel-shaped complex made of 28 subunits that are arranged in four stacked rings. The two outer rings are each formed by seven alpha subunits, and the two inner rings are formed by seven beta subunits. The proteolytic activity is exerted by three beta-subunits PSMB5, PSMB6 …
Serpinb6a	Up	1.38402	Up	1.11602	Q60854	reviewed	SPB6_MOUSE	Serpin B6 (Placental thrombin inhibitor) (Proteinase inhibitor 6) (PI-6)	378	gonad development [GO:0008406]; negative regulation of endopeptidase activity [GO:0010951]	collagen-containing extracellular matrix [GO:0062023]; cytoplasm [GO:0005737]; extracellular space [GO:0005615]	serine-type endopeptidase inhibitor activity [GO:0004867]	collagen-containing extracellular matrix [GO:0062023]; cytoplasm [GO:0005737]; extracellular space [GO:0005615]; serine-type endopeptidase inhibitor activity [GO:0004867]; gonad development [GO:0008406]; negative regulation of endopeptidase activity [GO:0010951]	GO:0004867; GO:0005615; GO:0005737; GO:0008406; GO:0010951; GO:0062023			cellular organisms (no rank), Eukaryota (superkingdom), Opisthokonta (clade), Metazoa (kingdom), Eumetazoa (clade), Bilateria (clade), Deuterostomia (clade), Chordata (phylum), Craniata (subphylum), Vertebrata (clade), Gnathostomata (clade), Teleostomi (clade), Euteleostomi (clade), Sarcopterygii (superclass), Dipnotetrapodomorpha (clade), Tetrapoda (clade), Amniota (clade), Mammalia (class), The…	131567 (no rank), 2759 (superkingdom), 33154 (clade), 33208 (kingdom), 6072 (clade), 33213 (clade), 33511 (clade), 7711 (phylum), 89593 (subphylum), 7742 (clade), 7776 (clade), 117570 (clade), 117571 (clade), 8287 (superclass), 1338369 (clade), 32523 (clade), 32524 (clade), 40674 (class), 32525 (clade), 9347 (clade), 1437010 (clade), 314146 (superorder), 314147 (clade), 9989 (order), 1963758 (sub…			SUBUNIT: Forms a complex with the monomeric form of beta-tryptase. {ECO:0000250}.
Gdi2	Up	0.77194	Up	0.414065	Q61598	reviewed	GDIB_MOUSE	Rab GDP dissociation inhibitor beta (Rab GDI beta) (GDI-3) (Guanosine diphosphate dissociation inhibitor 2) (GDI-2)	445	negative regulation of cilium assembly [GO:1902018]; negative regulation of protein localization to cilium [GO:1903565]; protein transport [GO:0015031]; small GTPase-mediated signal transduction [GO:0007264]; vesicle-mediated transport [GO:0016192]	Golgi apparatus [GO:0005794]; membrane [GO:0016020]; myelin sheath [GO:0043209]; synapse [GO:0045202]	GTPase activator activity [GO:0005096]; Rab GDP-dissociation inhibitor activity [GO:0005093]; small GTPase binding [GO:0031267]	Golgi apparatus [GO:0005794]; membrane [GO:0016020]; myelin sheath [GO:0043209]; synapse [GO:0045202]; GTPase activator activity [GO:0005096]; Rab GDP-dissociation inhibitor activity [GO:0005093]; small GTPase binding [GO:0031267]; negative regulation of cilium assembly [GO:1902018]; negative regulation of protein localization to cilium [GO:1903565]; protein transport [GO:0015031]; small GTPase-m…	GO:0005093; GO:0005096; GO:0005794; GO:0007264; GO:0015031; GO:0016020; GO:0016192; GO:0031267; GO:0043209; GO:0045202; GO:1902018; GO:1903565			cellular organisms (no rank), Eukaryota (superkingdom), Opisthokonta (clade), Metazoa (kingdom), Eumetazoa (clade), Bilateria (clade), Deuterostomia (clade), Chordata (phylum), Craniata (subphylum), Vertebrata (clade), Gnathostomata (clade), Teleostomi (clade), Euteleostomi (clade), Sarcopterygii (superclass), Dipnotetrapodomorpha (clade), Tetrapoda (clade), Amniota (clade), Mammalia (class), The…	131567 (no rank), 2759 (superkingdom), 33154 (clade), 33208 (kingdom), 6072 (clade), 33213 (clade), 33511 (clade), 7711 (phylum), 89593 (subphylum), 7742 (clade), 7776 (clade), 117570 (clade), 117571 (clade), 8287 (superclass), 1338369 (clade), 32523 (clade), 32524 (clade), 40674 (class), 32525 (clade), 9347 (clade), 1437010 (clade), 314146 (superorder), 314147 (clade), 9989 (order), 1963758 (sub…		Q8BMD2	SUBUNIT: Interacts with RHOH (By similarity). Interacts with the GDP-bound inactive forms of RAB3A, RAB3B, RAB3C, RAB5A, RAB5B, RAB5C, RAB8A, RAB8B, RAB10, RAB12, RAB35, and RAB43; binds RAB3D to a lesser extent (PubMed:25860027). Interacts with DZIP1; this interaction negatively regulates the interaction of GDI2 with GDP-bound RAB8A (PubMed:25860027). {ECO:0000250|UniProtKB:P50395, ECO:0000269|P…
Camk2d	Up	1.84308	Up	0.8606	Q6PHZ2	reviewed	KCC2D_MOUSE	Calcium/calmodulin-dependent protein kinase type II subunit delta (CaM kinase II subunit delta) (CaMK-II subunit delta) (EC 2.7.11.17)	499	calcium ion transport [GO:0006816]; cardiac muscle cell contraction [GO:0086003]; cardiac muscle contraction [GO:0060048]; G1/S transition of mitotic cell cycle [GO:0000082]; peptidyl-threonine phosphorylation [GO:0018107]; positive regulation of cardiac muscle hypertrophy [GO:0010613]; protein phosphorylation [GO:0006468]; regulation of cellular localization [GO:0060341]; regulation of relaxatio…	axon initial segment [GO:0043194]; cochlear hair cell ribbon synapse [GO:0098683]; cytoplasm [GO:0005737]; intercalated disc [GO:0014704]; neuromuscular junction [GO:0031594]; neuronal cell body [GO:0043025]; nucleus [GO:0005634]; postsynaptic cytosol [GO:0099524]; sarcoplasmic reticulum [GO:0016529]; sarcoplasmic reticulum membrane [GO:0033017]; T-tubule [GO:0030315]	ATP binding [GO:0005524]; calcium/calmodulin-dependent protein kinase activity [GO:0004683]; calmodulin binding [GO:0005516]; protein serine kinase activity [GO:0106310]; protein serine/threonine kinase activity [GO:0004674]; transmembrane transporter binding [GO:0044325]	axon initial segment [GO:0043194]; cochlear hair cell ribbon synapse [GO:0098683]; cytoplasm [GO:0005737]; intercalated disc [GO:0014704]; neuromuscular junction [GO:0031594]; neuronal cell body [GO:0043025]; nucleus [GO:0005634]; postsynaptic cytosol [GO:0099524]; sarcoplasmic reticulum [GO:0016529]; sarcoplasmic reticulum membrane [GO:0033017]; T-tubule [GO:0030315]; ATP binding [GO:0005524]; c…	GO:0000082; GO:0002028; GO:0004674; GO:0004683; GO:0005516; GO:0005524; GO:0005634; GO:0005737; GO:0006468; GO:0006816; GO:0010613; GO:0014704; GO:0016529; GO:0018107; GO:0030315; GO:0031594; GO:0033017; GO:0043025; GO:0043194; GO:0044325; GO:0055119; GO:0060048; GO:0060341; GO:0086003; GO:0098683; GO:0099524; GO:0106310; GO:1901897	ACT_SITE 136; /note=Proton acceptor; /evidence=ECO:0000255|PROSITE-ProRule:PRU00159, ECO:0000255|PROSITE-ProRule:PRU10027	BINDING 20..28; /ligand=ATP; /ligand_id=ChEBI:CHEBI:30616; /evidence=ECO:0000255|PROSITE-ProRule:PRU00159; BINDING 43; /ligand=ATP; /ligand_id=ChEBI:CHEBI:30616; /evidence=ECO:0000255|PROSITE-ProRule:PRU00159	cellular organisms (no rank), Eukaryota (superkingdom), Opisthokonta (clade), Metazoa (kingdom), Eumetazoa (clade), Bilateria (clade), Deuterostomia (clade), Chordata (phylum), Craniata (subphylum), Vertebrata (clade), Gnathostomata (clade), Teleostomi (clade), Euteleostomi (clade), Sarcopterygii (superclass), Dipnotetrapodomorpha (clade), Tetrapoda (clade), Amniota (clade), Mammalia (class), The…	131567 (no rank), 2759 (superkingdom), 33154 (clade), 33208 (kingdom), 6072 (clade), 33213 (clade), 33511 (clade), 7711 (phylum), 89593 (subphylum), 7742 (clade), 7776 (clade), 117570 (clade), 117571 (clade), 8287 (superclass), 1338369 (clade), 32523 (clade), 32524 (clade), 40674 (class), 32525 (clade), 9347 (clade), 1437010 (clade), 314146 (superorder), 314147 (clade), 9989 (order), 1963758 (sub…	PTM: Autophosphorylation of Thr-287 following activation by Ca(2+)/calmodulin. Phosphorylation of Thr-287 locks the kinase into an activated state (By similarity). {ECO:0000250}.	Q9JJ28; E9Q401	SUBUNIT: CAMK2 is composed of 4 different chains: alpha (CAMK2A), beta (CAMK2B), gamma (CAMK2G), and delta (CAMK2D). The different isoforms assemble into homo- or heteromultimeric holoenzymes composed of 12 subunits with two hexameric rings stacked one on top of the other. Interacts with RRAD (By similarity). Interacts with CACNB2. {ECO:0000250, ECO:0000269|PubMed:20194790}.
Nrap	Up	1.99856	Up	1.17297	Q80XB4	reviewed	NRAP_MOUSE	Nebulin-related-anchoring protein (N-RAP)	1728	actin cytoskeleton organization [GO:0030036]	fascia adherens [GO:0005916]; muscle tendon junction [GO:0005927]; myofibril [GO:0030016]; Z disc [GO:0030018]	actin binding [GO:0003779]; actin filament binding [GO:0051015]; metal ion binding [GO:0046872]; muscle alpha-actinin binding [GO:0051371]; vinculin binding [GO:0017166]	fascia adherens [GO:0005916]; muscle tendon junction [GO:0005927]; myofibril [GO:0030016]; Z disc [GO:0030018]; actin binding [GO:0003779]; actin filament binding [GO:0051015]; metal ion binding [GO:0046872]; muscle alpha-actinin binding [GO:0051371]; vinculin binding [GO:0017166]; actin cytoskeleton organization [GO:0030036]	GO:0003779; GO:0005916; GO:0005927; GO:0017166; GO:0030016; GO:0030018; GO:0030036; GO:0046872; GO:0051015; GO:0051371			cellular organisms (no rank), Eukaryota (superkingdom), Opisthokonta (clade), Metazoa (kingdom), Eumetazoa (clade), Bilateria (clade), Deuterostomia (clade), Chordata (phylum), Craniata (subphylum), Vertebrata (clade), Gnathostomata (clade), Teleostomi (clade), Euteleostomi (clade), Sarcopterygii (superclass), Dipnotetrapodomorpha (clade), Tetrapoda (clade), Amniota (clade), Mammalia (class), The…	131567 (no rank), 2759 (superkingdom), 33154 (clade), 33208 (kingdom), 6072 (clade), 33213 (clade), 33511 (clade), 7711 (phylum), 89593 (subphylum), 7742 (clade), 7776 (clade), 117570 (clade), 117571 (clade), 8287 (superclass), 1338369 (clade), 32523 (clade), 32524 (clade), 40674 (class), 32525 (clade), 9347 (clade), 1437010 (clade), 314146 (superorder), 314147 (clade), 9989 (order), 1963758 (sub…			SUBUNIT: Interacts with actin, alpha-actinin, KLHL41, TLN1 and VCL. Interacts with CSRP3. {ECO:0000250|UniProtKB:Q86VF7, ECO:0000269|PubMed:10320340, ECO:0000269|PubMed:11732910, ECO:0000269|PubMed:12692149, ECO:0000269|PubMed:9295142}.
Psmd11	Up	1.16762	Up	0.812608	Q8BG32	reviewed	PSD11_MOUSE	26S proteasome non-ATPase regulatory subunit 11 (26S proteasome regulatory subunit RPN6) (26S proteasome regulatory subunit S9) (26S proteasome regulatory subunit p44.5)	422	proteasome assembly [GO:0043248]; stem cell differentiation [GO:0048863]; ubiquitin-dependent protein catabolic process [GO:0006511]	proteasome accessory complex [GO:0022624]; proteasome regulatory particle [GO:0005838]		proteasome accessory complex [GO:0022624]; proteasome regulatory particle [GO:0005838]; proteasome assembly [GO:0043248]; stem cell differentiation [GO:0048863]; ubiquitin-dependent protein catabolic process [GO:0006511]	GO:0005838; GO:0006511; GO:0022624; GO:0043248; GO:0048863			cellular organisms (no rank), Eukaryota (superkingdom), Opisthokonta (clade), Metazoa (kingdom), Eumetazoa (clade), Bilateria (clade), Deuterostomia (clade), Chordata (phylum), Craniata (subphylum), Vertebrata (clade), Gnathostomata (clade), Teleostomi (clade), Euteleostomi (clade), Sarcopterygii (superclass), Dipnotetrapodomorpha (clade), Tetrapoda (clade), Amniota (clade), Mammalia (class), The…	131567 (no rank), 2759 (superkingdom), 33154 (clade), 33208 (kingdom), 6072 (clade), 33213 (clade), 33511 (clade), 7711 (phylum), 89593 (subphylum), 7742 (clade), 7776 (clade), 117570 (clade), 117571 (clade), 8287 (superclass), 1338369 (clade), 32523 (clade), 32524 (clade), 40674 (class), 32525 (clade), 9347 (clade), 1437010 (clade), 314146 (superorder), 314147 (clade), 9989 (order), 1963758 (sub…			SUBUNIT: Component of the 19S proteasome regulatory particle complex. The 26S proteasome consists of a 20S core particle (CP) and two 19S regulatory subunits (RP). The regulatory particle is made of a lid composed of 9 subunits including PSMD11, a base containing 6 ATPases and few additional components. {ECO:0000250|UniProtKB:O00231, ECO:0000269|PubMed:16857966}.
Prune1	Up	2.44377	Up	0.754393	Q8BIW1	reviewed	PRUN1_MOUSE	Exopolyphosphatase PRUNE1 (EC 3.6.1.1) (PRUNEM1)	454	regulation of microtubule polymerization [GO:0031113]; regulation of neurogenesis [GO:0050767]	cytosol [GO:0005829]; focal adhesion [GO:0005925]; nucleus [GO:0005634]	inorganic diphosphate phosphatase activity [GO:0004427]; metal ion binding [GO:0046872]; phosphatase activity [GO:0016791]; tubulin binding [GO:0015631]	cytosol [GO:0005829]; focal adhesion [GO:0005925]; nucleus [GO:0005634]; inorganic diphosphate phosphatase activity [GO:0004427]; metal ion binding [GO:0046872]; phosphatase activity [GO:0016791]; tubulin binding [GO:0015631]; regulation of microtubule polymerization [GO:0031113]; regulation of neurogenesis [GO:0050767]	GO:0004427; GO:0005634; GO:0005829; GO:0005925; GO:0015631; GO:0016791; GO:0031113; GO:0046872; GO:0050767		BINDING 28; /ligand=Mn(2+); /ligand_id=ChEBI:CHEBI:29035; /ligand_label=1; /evidence=ECO:0000250; BINDING 30; /ligand=Mn(2+); /ligand_id=ChEBI:CHEBI:29035; /ligand_label=2; /evidence=ECO:0000250; BINDING 106; /ligand=Mn(2+); /ligand_id=ChEBI:CHEBI:29035; /ligand_label=1; /evidence=ECO:0000250; BINDING 106; /ligand=Mn(2+); /ligand_id=ChEBI:CHEBI:29035; /ligand_label=2; /evidence=ECO:0000250; BINDI…	cellular organisms (no rank), Eukaryota (superkingdom), Opisthokonta (clade), Metazoa (kingdom), Eumetazoa (clade), Bilateria (clade), Deuterostomia (clade), Chordata (phylum), Craniata (subphylum), Vertebrata (clade), Gnathostomata (clade), Teleostomi (clade), Euteleostomi (clade), Sarcopterygii (superclass), Dipnotetrapodomorpha (clade), Tetrapoda (clade), Amniota (clade), Mammalia (class), The…	131567 (no rank), 2759 (superkingdom), 33154 (clade), 33208 (kingdom), 6072 (clade), 33213 (clade), 33511 (clade), 7711 (phylum), 89593 (subphylum), 7742 (clade), 7776 (clade), 117570 (clade), 117571 (clade), 8287 (superclass), 1338369 (clade), 32523 (clade), 32524 (clade), 40674 (class), 32525 (clade), 9347 (clade), 1437010 (clade), 314146 (superorder), 314147 (clade), 9989 (order), 1963758 (sub…			SUBUNIT: Homooligomer. Able to homodimerize via its C-terminal domain. Interacts with NME1. Interacts with GSK3; at focal adhesion complexes where paxillin and vinculin are colocalized. Interacts with alpha and beta tubulin. {ECO:0000250|UniProtKB:Q86TP1}.
Txnl1	Up	1.29668	Up	0.629335	Q8CDN6	reviewed	TXNL1_MOUSE	Thioredoxin-like protein 1 (32 kDa thioredoxin-related protein)	289		cytoplasm [GO:0005737]; nucleus [GO:0005634]; proteasome complex [GO:0000502]		cytoplasm [GO:0005737]; nucleus [GO:0005634]; proteasome complex [GO:0000502]	GO:0000502; GO:0005634; GO:0005737			cellular organisms (no rank), Eukaryota (superkingdom), Opisthokonta (clade), Metazoa (kingdom), Eumetazoa (clade), Bilateria (clade), Deuterostomia (clade), Chordata (phylum), Craniata (subphylum), Vertebrata (clade), Gnathostomata (clade), Teleostomi (clade), Euteleostomi (clade), Sarcopterygii (superclass), Dipnotetrapodomorpha (clade), Tetrapoda (clade), Amniota (clade), Mammalia (class), The…	131567 (no rank), 2759 (superkingdom), 33154 (clade), 33208 (kingdom), 6072 (clade), 33213 (clade), 33511 (clade), 7711 (phylum), 89593 (subphylum), 7742 (clade), 7776 (clade), 117570 (clade), 117571 (clade), 8287 (superclass), 1338369 (clade), 32523 (clade), 32524 (clade), 40674 (class), 32525 (clade), 9347 (clade), 1437010 (clade), 314146 (superorder), 314147 (clade), 9989 (order), 1963758 (sub…			SUBUNIT: Component of the 19S regulatory cap of the 26S proteasome. Interacts with PSMD14/RPN11. Interacts with, and reduces EEF1A1 (By similarity). {ECO:0000250}.
Pdlim5	Up	0.700087	Up	1.07213	Q8CI51	reviewed	PDLI5_MOUSE	PDZ and LIM domain protein 5 (Enigma homolog) (Enigma-like PDZ and LIM domains protein)	591	regulation of dendritic spine morphogenesis [GO:0061001]; regulation of synapse assembly [GO:0051963]	cell projection [GO:0042995]; cytosol [GO:0005829]; postsynaptic density [GO:0014069]; presynapse [GO:0098793]; Z disc [GO:0030018]	metal ion binding [GO:0046872]	cell projection [GO:0042995]; cytosol [GO:0005829]; postsynaptic density [GO:0014069]; presynapse [GO:0098793]; Z disc [GO:0030018]; metal ion binding [GO:0046872]; regulation of dendritic spine morphogenesis [GO:0061001]; regulation of synapse assembly [GO:0051963]	GO:0005829; GO:0014069; GO:0030018; GO:0042995; GO:0046872; GO:0051963; GO:0061001; GO:0098793			cellular organisms (no rank), Eukaryota (superkingdom), Opisthokonta (clade), Metazoa (kingdom), Eumetazoa (clade), Bilateria (clade), Deuterostomia (clade), Chordata (phylum), Craniata (subphylum), Vertebrata (clade), Gnathostomata (clade), Teleostomi (clade), Euteleostomi (clade), Sarcopterygii (superclass), Dipnotetrapodomorpha (clade), Tetrapoda (clade), Amniota (clade), Mammalia (class), The…	131567 (no rank), 2759 (superkingdom), 33154 (clade), 33208 (kingdom), 6072 (clade), 33213 (clade), 33511 (clade), 7711 (phylum), 89593 (subphylum), 7742 (clade), 7776 (clade), 117570 (clade), 117571 (clade), 8287 (superclass), 1338369 (clade), 32523 (clade), 32524 (clade), 40674 (class), 32525 (clade), 9347 (clade), 1437010 (clade), 314146 (superorder), 314147 (clade), 9989 (order), 1963758 (sub…			SUBUNIT: Interacts with various PKC isoforms through the LIM domains. Interacts with actin and alpha-actinin through the PDZ domain. Interacts (via LIM domains) with SIPA1L1/SPAR; this interaction may occur preferentially with isoform 1. {ECO:0000250|UniProtKB:Q62920}.
Svil	Up	2.13322	Up	0.890399	Q8K4L3	reviewed	SVIL_MOUSE	Supervillin (Archvillin) (p205/p250)	2170	cytoskeleton organization [GO:0007010]; muscle cell differentiation [GO:0042692]; positive regulation of cytokinesis [GO:0032467]	cell periphery [GO:0071944]; cell projection [GO:0042995]; cleavage furrow [GO:0032154]; costamere [GO:0043034]; cytoplasm [GO:0005737]; focal adhesion [GO:0005925]; microtubule minus-end [GO:0036449]; midbody [GO:0030496]; nucleoplasm [GO:0005654]; podosome [GO:0002102]; sarcolemma [GO:0042383]	actin filament binding [GO:0051015]	cell periphery [GO:0071944]; cell projection [GO:0042995]; cleavage furrow [GO:0032154]; costamere [GO:0043034]; cytoplasm [GO:0005737]; focal adhesion [GO:0005925]; microtubule minus-end [GO:0036449]; midbody [GO:0030496]; nucleoplasm [GO:0005654]; podosome [GO:0002102]; sarcolemma [GO:0042383]; actin filament binding [GO:0051015]; cytoskeleton organization [GO:0007010]; muscle cell differentiat…	GO:0002102; GO:0005654; GO:0005737; GO:0005925; GO:0007010; GO:0030496; GO:0032154; GO:0032467; GO:0036449; GO:0042383; GO:0042692; GO:0042995; GO:0043034; GO:0051015; GO:0071944			cellular organisms (no rank), Eukaryota (superkingdom), Opisthokonta (clade), Metazoa (kingdom), Eumetazoa (clade), Bilateria (clade), Deuterostomia (clade), Chordata (phylum), Craniata (subphylum), Vertebrata (clade), Gnathostomata (clade), Teleostomi (clade), Euteleostomi (clade), Sarcopterygii (superclass), Dipnotetrapodomorpha (clade), Tetrapoda (clade), Amniota (clade), Mammalia (class), The…	131567 (no rank), 2759 (superkingdom), 33154 (clade), 33208 (kingdom), 6072 (clade), 33213 (clade), 33511 (clade), 7711 (phylum), 89593 (subphylum), 7742 (clade), 7776 (clade), 117570 (clade), 117571 (clade), 8287 (superclass), 1338369 (clade), 32523 (clade), 32524 (clade), 40674 (class), 32525 (clade), 9347 (clade), 1437010 (clade), 314146 (superorder), 314147 (clade), 9989 (order), 1963758 (sub…			SUBUNIT: Associates with F-actin (By similarity). Interacts with NEB (By similarity). Interacts with MYH9 (By similarity). Interacts with MYLK (By similarity). Interacts with TASOR (PubMed:31112734). {ECO:0000250|UniProtKB:O46385, ECO:0000269|PubMed:31112734}.; SUBUNIT: [Isoform 2]: Interacts with TRIP6 (By similarity). Interacts with DYNLT1 (By similarity). Interacts with KIF14; at midbody durin…
Psmd2	Up	0.975928	Up	0.729024	Q8VDM4	reviewed	PSMD2_MOUSE	26S proteasome non-ATPase regulatory subunit 2 (26S proteasome regulatory subunit RPN1) (26S proteasome regulatory subunit S2) (26S proteasome subunit p97)	908	regulation of protein catabolic process [GO:0042176]	proteasome accessory complex [GO:0022624]; proteasome complex [GO:0000502]; proteasome regulatory particle [GO:0005838]	enzyme regulator activity [GO:0030234]	proteasome accessory complex [GO:0022624]; proteasome complex [GO:0000502]; proteasome regulatory particle [GO:0005838]; enzyme regulator activity [GO:0030234]; regulation of protein catabolic process [GO:0042176]	GO:0000502; GO:0005838; GO:0022624; GO:0030234; GO:0042176			cellular organisms (no rank), Eukaryota (superkingdom), Opisthokonta (clade), Metazoa (kingdom), Eumetazoa (clade), Bilateria (clade), Deuterostomia (clade), Chordata (phylum), Craniata (subphylum), Vertebrata (clade), Gnathostomata (clade), Teleostomi (clade), Euteleostomi (clade), Sarcopterygii (superclass), Dipnotetrapodomorpha (clade), Tetrapoda (clade), Amniota (clade), Mammalia (class), The…	131567 (no rank), 2759 (superkingdom), 33154 (clade), 33208 (kingdom), 6072 (clade), 33213 (clade), 33511 (clade), 7711 (phylum), 89593 (subphylum), 7742 (clade), 7776 (clade), 117570 (clade), 117571 (clade), 8287 (superclass), 1338369 (clade), 32523 (clade), 32524 (clade), 40674 (class), 32525 (clade), 9347 (clade), 1437010 (clade), 314146 (superorder), 314147 (clade), 9989 (order), 1963758 (sub…			SUBUNIT: Component of the 19S proteasome regulatory particle complex. The 26S proteasome consists of a 20S core particle (CP) and two 19S regulatory subunits (RP). The regulatory particle is made of a lid composed of 9 subunits, a base containing 6 ATPases and few additional components including PSMD2 (By similarity). Interacts with RPGRIP1L (PubMed:26150391). Interacts with CRY1 in a KDM8-depend…
Lmcd1	Up	1.40869	Up	0.809748	Q8VEE1	reviewed	LMCD1_MOUSE	LIM and cysteine-rich domains protein 1	365	negative regulation of transcription by RNA polymerase II [GO:0000122]; positive regulation of calcineurin-NFAT signaling cascade [GO:0070886]; regulation of cardiac muscle hypertrophy [GO:0010611]	cytoplasm [GO:0005737]; nucleus [GO:0005634]	transcription corepressor activity [GO:0003714]; zinc ion binding [GO:0008270]	cytoplasm [GO:0005737]; nucleus [GO:0005634]; transcription corepressor activity [GO:0003714]; zinc ion binding [GO:0008270]; negative regulation of transcription by RNA polymerase II [GO:0000122]; positive regulation of calcineurin-NFAT signaling cascade [GO:0070886]; regulation of cardiac muscle hypertrophy [GO:0010611]	GO:0000122; GO:0003714; GO:0005634; GO:0005737; GO:0008270; GO:0010611; GO:0070886			cellular organisms (no rank), Eukaryota (superkingdom), Opisthokonta (clade), Metazoa (kingdom), Eumetazoa (clade), Bilateria (clade), Deuterostomia (clade), Chordata (phylum), Craniata (subphylum), Vertebrata (clade), Gnathostomata (clade), Teleostomi (clade), Euteleostomi (clade), Sarcopterygii (superclass), Dipnotetrapodomorpha (clade), Tetrapoda (clade), Amniota (clade), Mammalia (class), The…	131567 (no rank), 2759 (superkingdom), 33154 (clade), 33208 (kingdom), 6072 (clade), 33213 (clade), 33511 (clade), 7711 (phylum), 89593 (subphylum), 7742 (clade), 7776 (clade), 117570 (clade), 117571 (clade), 8287 (superclass), 1338369 (clade), 32523 (clade), 32524 (clade), 40674 (class), 32525 (clade), 9347 (clade), 1437010 (clade), 314146 (superorder), 314147 (clade), 9989 (order), 1963758 (sub…			SUBUNIT: Interacts with beta-dystroglycan (By similarity). Interacts with GATA1, GATA4 and GATA6. {ECO:0000250, ECO:0000269|PubMed:16199866}.
Flnc	Up	1.38037	Up	0.867068	Q8VHX6	reviewed	FLNC_MOUSE	Filamin-C (FLN-C) (ABP-280-like protein) (ABP-L) (Actin-binding-like protein) (Filamin-2) (Gamma-filamin)	2726	actin filament-based process [GO:0030029]; muscle cell development [GO:0055001]; sarcomere organization [GO:0045214]	actin cytoskeleton [GO:0015629]; cytosol [GO:0005829]; intercellular bridge [GO:0045171]; sarcolemma [GO:0042383]; sarcoplasm [GO:0016528]; Z disc [GO:0030018]	actin binding [GO:0003779]; actin filament binding [GO:0051015]; ankyrin binding [GO:0030506]	actin cytoskeleton [GO:0015629]; cytosol [GO:0005829]; intercellular bridge [GO:0045171]; sarcolemma [GO:0042383]; sarcoplasm [GO:0016528]; Z disc [GO:0030018]; actin binding [GO:0003779]; actin filament binding [GO:0051015]; ankyrin binding [GO:0030506]; actin filament-based process [GO:0030029]; muscle cell development [GO:0055001]; sarcomere organization [GO:0045214]	GO:0003779; GO:0005829; GO:0015629; GO:0016528; GO:0030018; GO:0030029; GO:0030506; GO:0042383; GO:0045171; GO:0045214; GO:0051015; GO:0055001			cellular organisms (no rank), Eukaryota (superkingdom), Opisthokonta (clade), Metazoa (kingdom), Eumetazoa (clade), Bilateria (clade), Deuterostomia (clade), Chordata (phylum), Craniata (subphylum), Vertebrata (clade), Gnathostomata (clade), Teleostomi (clade), Euteleostomi (clade), Sarcopterygii (superclass), Dipnotetrapodomorpha (clade), Tetrapoda (clade), Amniota (clade), Mammalia (class), The…	131567 (no rank), 2759 (superkingdom), 33154 (clade), 33208 (kingdom), 6072 (clade), 33213 (clade), 33511 (clade), 7711 (phylum), 89593 (subphylum), 7742 (clade), 7776 (clade), 117570 (clade), 117571 (clade), 8287 (superclass), 1338369 (clade), 32523 (clade), 32524 (clade), 40674 (class), 32525 (clade), 9347 (clade), 1437010 (clade), 314146 (superorder), 314147 (clade), 9989 (order), 1963758 (sub…	PTM: Ubiquitinated by FBXL22, leading to proteasomal degradation. {ECO:0000250}.		SUBUNIT: Homodimer; the filamin repeat 24 and the second hinge domain are important for dimer formation (By similarity). Interacts with FLNB, INPPL1, ITGB1A, KCND2, MYOT, MYOZ1 and MYOZ3. Interacts with sarcoglycans SGCD and SGCG. Interacts (via filament repeats 17-18, 20-21 and 24) with USP25 (isoform USP25m only). Interacts with FBLIM1 (By similarity). Interacts with XIRP1; this interaction is …
Clip1	Up	0.647336	Up	1.04725	Q922J3	reviewed	CLIP1_MOUSE	CAP-Gly domain-containing linker protein 1 (Cytoplasmic linker protein 170) (CLIP-170) (Restin)	1391	microtubule bundle formation [GO:0001578]; positive regulation of microtubule polymerization [GO:0031116]; protein transport into plasma membrane raft [GO:0044861]	cytoplasmic vesicle membrane [GO:0030659]; microtubule [GO:0005874]; microtubule cytoskeleton [GO:0015630]; microtubule plus-end [GO:0035371]; nuclear envelope [GO:0005635]; ruffle [GO:0001726]	microtubule binding [GO:0008017]; microtubule plus-end binding [GO:0051010]; tubulin binding [GO:0015631]; zinc ion binding [GO:0008270]	cytoplasmic vesicle membrane [GO:0030659]; microtubule [GO:0005874]; microtubule cytoskeleton [GO:0015630]; microtubule plus-end [GO:0035371]; nuclear envelope [GO:0005635]; ruffle [GO:0001726]; microtubule binding [GO:0008017]; microtubule plus-end binding [GO:0051010]; tubulin binding [GO:0015631]; zinc ion binding [GO:0008270]; microtubule bundle formation [GO:0001578]; positive regulation of …	GO:0001578; GO:0001726; GO:0005635; GO:0005874; GO:0008017; GO:0008270; GO:0015630; GO:0015631; GO:0030659; GO:0031116; GO:0035371; GO:0044861; GO:0051010			cellular organisms (no rank), Eukaryota (superkingdom), Opisthokonta (clade), Metazoa (kingdom), Eumetazoa (clade), Bilateria (clade), Deuterostomia (clade), Chordata (phylum), Craniata (subphylum), Vertebrata (clade), Gnathostomata (clade), Teleostomi (clade), Euteleostomi (clade), Sarcopterygii (superclass), Dipnotetrapodomorpha (clade), Tetrapoda (clade), Amniota (clade), Mammalia (class), The…	131567 (no rank), 2759 (superkingdom), 33154 (clade), 33208 (kingdom), 6072 (clade), 33213 (clade), 33511 (clade), 7711 (phylum), 89593 (subphylum), 7742 (clade), 7776 (clade), 117570 (clade), 117571 (clade), 8287 (superclass), 1338369 (clade), 32523 (clade), 32524 (clade), 40674 (class), 32525 (clade), 9347 (clade), 1437010 (clade), 314146 (superorder), 314147 (clade), 9989 (order), 1963758 (sub…	PTM: Phosphorylated (PubMed:26972003). Phosphorylation induces conformational changes by increasing the affinity of the N-terminus for C-terminus, resulting in inhibition of its function thus decreasing its binding to microtubules and DCTN1. Exhibits a folded, autoinhibited conformation when phosphorylated and an open conformation when dephosphorylated with increased binding affinity to microtubu…		SUBUNIT: Interacts with MTOR; phosphorylates and regulates CLIP1. Interacts (via CAP-Gly domains) with tubulin. Interacts with SLAIN2. Interacts with TUBA1B, MAPRE1 and MAPRE3. Interacts (via zinc finger) with DCTN1 (By similarity). Binds preferentially to tyrosinated microtubules, and only marginally to detyrosinated microtubules (PubMed:16954346). {ECO:0000250|UniProtKB:P30622, ECO:0000269|PubM…
Pacsin3	Up	0.818025	Up	0.538102	Q99JB8	reviewed	PACN3_MOUSE	Protein kinase C and casein kinase II substrate protein 3	424	endocytosis [GO:0006897]; negative regulation of calcium ion transport [GO:0051926]; negative regulation of endocytosis [GO:0045806]; plasma membrane tubulation [GO:0097320]; positive regulation of membrane protein ectodomain proteolysis [GO:0051044]	cytoplasm [GO:0005737]; cytosol [GO:0005829]; plasma membrane [GO:0005886]	calcium channel inhibitor activity [GO:0019855]; cytoskeletal protein binding [GO:0008092]; identical protein binding [GO:0042802]; lipid binding [GO:0008289]	cytoplasm [GO:0005737]; cytosol [GO:0005829]; plasma membrane [GO:0005886]; calcium channel inhibitor activity [GO:0019855]; cytoskeletal protein binding [GO:0008092]; identical protein binding [GO:0042802]; lipid binding [GO:0008289]; endocytosis [GO:0006897]; negative regulation of calcium ion transport [GO:0051926]; negative regulation of endocytosis [GO:0045806]; plasma membrane tubulation [G…	GO:0005737; GO:0005829; GO:0005886; GO:0006897; GO:0008092; GO:0008289; GO:0019855; GO:0042802; GO:0045806; GO:0051044; GO:0051926; GO:0097320			cellular organisms (no rank), Eukaryota (superkingdom), Opisthokonta (clade), Metazoa (kingdom), Eumetazoa (clade), Bilateria (clade), Deuterostomia (clade), Chordata (phylum), Craniata (subphylum), Vertebrata (clade), Gnathostomata (clade), Teleostomi (clade), Euteleostomi (clade), Sarcopterygii (superclass), Dipnotetrapodomorpha (clade), Tetrapoda (clade), Amniota (clade), Mammalia (class), The…	131567 (no rank), 2759 (superkingdom), 33154 (clade), 33208 (kingdom), 6072 (clade), 33213 (clade), 33511 (clade), 7711 (phylum), 89593 (subphylum), 7742 (clade), 7776 (clade), 117570 (clade), 117571 (clade), 8287 (superclass), 1338369 (clade), 32523 (clade), 32524 (clade), 40674 (class), 32525 (clade), 9347 (clade), 1437010 (clade), 314146 (superorder), 314147 (clade), 9989 (order), 1963758 (sub…	PTM: Phosphorylated by casein kinase 2 (CK2) and protein kinase C (PKC).		SUBUNIT: Homodimer. May form heterooligomers with other PACSINs. Interacts (via SH3 domain) with DNM1, SYNJ1 and WASL. Interacts with TRPV4. {ECO:0000269|PubMed:11082044, ECO:0000269|PubMed:16627472, ECO:0000269|PubMed:18174177, ECO:0000269|PubMed:22573331}.
Acp1	Up	0.936328	Up	0.581037	Q9D358	reviewed	PPAC_MOUSE	Low molecular weight phosphotyrosine protein phosphatase (LMW-PTP) (LMW-PTPase) (EC 3.1.3.48) (Low molecular weight cytosolic acid phosphatase) (EC 3.1.3.2)	158		cytoplasmic side of plasma membrane [GO:0009898]; cytosol [GO:0005829]; sarcolemma [GO:0042383]	acid phosphatase activity [GO:0003993]; histone H2AXY142 phosphatase activity [GO:0140793]; non-membrane spanning protein tyrosine phosphatase activity [GO:0004726]; phosphatase activity [GO:0016791]; protein tyrosine phosphatase activity [GO:0004725]; protein tyrosine phosphatase activity, metal-dependent [GO:0030946]	cytoplasmic side of plasma membrane [GO:0009898]; cytosol [GO:0005829]; sarcolemma [GO:0042383]; acid phosphatase activity [GO:0003993]; histone H2AXY142 phosphatase activity [GO:0140793]; non-membrane spanning protein tyrosine phosphatase activity [GO:0004726]; phosphatase activity [GO:0016791]; protein tyrosine phosphatase activity [GO:0004725]; protein tyrosine phosphatase activity, metal-depe…	GO:0003993; GO:0004725; GO:0004726; GO:0005829; GO:0009898; GO:0016791; GO:0030946; GO:0042383; GO:0140793	ACT_SITE 13; /note=Nucleophile; /evidence=ECO:0000250|UniProtKB:P11064; ACT_SITE 19; /evidence=ECO:0000250|UniProtKB:P11064; ACT_SITE 130; /note=Proton donor; /evidence=ECO:0000250|UniProtKB:P11064		cellular organisms (no rank), Eukaryota (superkingdom), Opisthokonta (clade), Metazoa (kingdom), Eumetazoa (clade), Bilateria (clade), Deuterostomia (clade), Chordata (phylum), Craniata (subphylum), Vertebrata (clade), Gnathostomata (clade), Teleostomi (clade), Euteleostomi (clade), Sarcopterygii (superclass), Dipnotetrapodomorpha (clade), Tetrapoda (clade), Amniota (clade), Mammalia (class), The…	131567 (no rank), 2759 (superkingdom), 33154 (clade), 33208 (kingdom), 6072 (clade), 33213 (clade), 33511 (clade), 7711 (phylum), 89593 (subphylum), 7742 (clade), 7776 (clade), 117570 (clade), 117571 (clade), 8287 (superclass), 1338369 (clade), 32523 (clade), 32524 (clade), 40674 (class), 32525 (clade), 9347 (clade), 1437010 (clade), 314146 (superorder), 314147 (clade), 9989 (order), 1963758 (sub…	PTM: [Isoform 2]: Phosphorylated by LCK. Phosphorylation at Tyr-132 increases its phosphatase activity. {ECO:0000250|UniProtKB:P24666}.		SUBUNIT: Interacts with EPHA2; dephosphorylates EPHA2. Interacts with EPHB1. {ECO:0000250|UniProtKB:P24666}.; SUBUNIT: [Isoform 1]: Interacts with the SH3 domain of SPTAN1. There is no interaction observed for isoform 2. {ECO:0000250|UniProtKB:P24666}.
Klhl40	Up	1.0096	Up	0.578454	Q9D783	reviewed	KLH40_MOUSE	Kelch-like protein 40 (Kelch repeat and BTB domain-containing protein 5)	621	negative regulation of proteasomal ubiquitin-dependent protein catabolic process [GO:0032435]; negative regulation of protein ubiquitination [GO:0031397]; positive regulation of proteasomal ubiquitin-dependent protein catabolic process [GO:0032436]; positive regulation of protein ubiquitination [GO:0031398]; proteasome-mediated ubiquitin-dependent protein catabolic process [GO:0043161]; protein u…	A band [GO:0031672]; Cul3-RING ubiquitin ligase complex [GO:0031463]; cytoplasm [GO:0005737]; I band [GO:0031674]		A band [GO:0031672]; Cul3-RING ubiquitin ligase complex [GO:0031463]; cytoplasm [GO:0005737]; I band [GO:0031674]; negative regulation of proteasomal ubiquitin-dependent protein catabolic process [GO:0032435]; negative regulation of protein ubiquitination [GO:0031397]; positive regulation of proteasomal ubiquitin-dependent protein catabolic process [GO:0032436]; positive regulation of protein ubi…	GO:0005737; GO:0016567; GO:0031397; GO:0031398; GO:0031463; GO:0031672; GO:0031674; GO:0032435; GO:0032436; GO:0043161; GO:0048741; GO:0098528			cellular organisms (no rank), Eukaryota (superkingdom), Opisthokonta (clade), Metazoa (kingdom), Eumetazoa (clade), Bilateria (clade), Deuterostomia (clade), Chordata (phylum), Craniata (subphylum), Vertebrata (clade), Gnathostomata (clade), Teleostomi (clade), Euteleostomi (clade), Sarcopterygii (superclass), Dipnotetrapodomorpha (clade), Tetrapoda (clade), Amniota (clade), Mammalia (class), The…	131567 (no rank), 2759 (superkingdom), 33154 (clade), 33208 (kingdom), 6072 (clade), 33213 (clade), 33511 (clade), 7711 (phylum), 89593 (subphylum), 7742 (clade), 7776 (clade), 117570 (clade), 117571 (clade), 8287 (superclass), 1338369 (clade), 32523 (clade), 32524 (clade), 40674 (class), 32525 (clade), 9347 (clade), 1437010 (clade), 314146 (superorder), 314147 (clade), 9989 (order), 1963758 (sub…			SUBUNIT: Component of the BCR(KLHL40) E3 ubiquitin ligase complex, at least composed of CUL3, KLHL40 and RBX1 (PubMed:24361185). Interacts with LMOD3 (PubMed:24960163). {ECO:0000269|PubMed:24361185, ECO:0000269|PubMed:24960163}.
Ehd4	Up	1.39833	Up	0.705959	Q9EQP2	reviewed	EHD4_MOUSE	EH domain-containing protein 4 (PAST homolog 2) (mPAST2)	541	cell migration involved in sprouting angiogenesis [GO:0002042]; cellular response to growth factor stimulus [GO:0071363]; endocytic recycling [GO:0032456]; pinocytosis [GO:0006907]; protein homooligomerization [GO:0051260]; regulation of endocytosis [GO:0030100]	adherens junction [GO:0005912]; early endosome membrane [GO:0031901]; endoplasmic reticulum [GO:0005783]; perinuclear region of cytoplasm [GO:0048471]; plasma membrane [GO:0005886]; recycling endosome membrane [GO:0055038]	ATP binding [GO:0005524]; calcium ion binding [GO:0005509]; GTP binding [GO:0005525]; protein-macromolecule adaptor activity [GO:0030674]	adherens junction [GO:0005912]; early endosome membrane [GO:0031901]; endoplasmic reticulum [GO:0005783]; perinuclear region of cytoplasm [GO:0048471]; plasma membrane [GO:0005886]; recycling endosome membrane [GO:0055038]; ATP binding [GO:0005524]; calcium ion binding [GO:0005509]; GTP binding [GO:0005525]; protein-macromolecule adaptor activity [GO:0030674]; cell migration involved in sprouting…	GO:0002042; GO:0005509; GO:0005524; GO:0005525; GO:0005783; GO:0005886; GO:0005912; GO:0006907; GO:0030100; GO:0030674; GO:0031901; GO:0032456; GO:0048471; GO:0051260; GO:0055038; GO:0071363		BINDING 68..75; /ligand=ATP; /ligand_id=ChEBI:CHEBI:30616; /evidence=ECO:0000250|UniProtKB:Q8BH64; BINDING 223; /ligand=ATP; /ligand_id=ChEBI:CHEBI:30616; /evidence=ECO:0000250|UniProtKB:Q8BH64; BINDING 261; /ligand=ATP; /ligand_id=ChEBI:CHEBI:30616; /evidence=ECO:0000250|UniProtKB:Q8BH64; BINDING 492; /ligand=Ca(2+); /ligand_id=ChEBI:CHEBI:29108; /evidence=ECO:0000255|PROSITE-ProRule:PRU00448; B…	cellular organisms (no rank), Eukaryota (superkingdom), Opisthokonta (clade), Metazoa (kingdom), Eumetazoa (clade), Bilateria (clade), Deuterostomia (clade), Chordata (phylum), Craniata (subphylum), Vertebrata (clade), Gnathostomata (clade), Teleostomi (clade), Euteleostomi (clade), Sarcopterygii (superclass), Dipnotetrapodomorpha (clade), Tetrapoda (clade), Amniota (clade), Mammalia (class), The…	131567 (no rank), 2759 (superkingdom), 33154 (clade), 33208 (kingdom), 6072 (clade), 33213 (clade), 33511 (clade), 7711 (phylum), 89593 (subphylum), 7742 (clade), 7776 (clade), 117570 (clade), 117571 (clade), 8287 (superclass), 1338369 (clade), 32523 (clade), 32524 (clade), 40674 (class), 32525 (clade), 9347 (clade), 1437010 (clade), 314146 (superorder), 314147 (clade), 9989 (order), 1963758 (sub…		Q9QY17; Q9Z2P6	SUBUNIT: Homooligomer, and heterooligomer with EHD1, EHD2 and EHD3. Forms a complex with EHD4 and MICALL1; the complex controls CDH5 trafficking and coordinates angiogenesis (PubMed:33972531). {ECO:0000250|UniProtKB:Q9H223, ECO:0000269|PubMed:33972531}.
Myot	Up	0.737391	Up	1.10769	Q9JIF9	reviewed	MYOTI_MOUSE	Myotilin (Myofibrillar titin-like Ig domains protein) (Titin immunoglobulin domain protein)	496		cytoskeleton [GO:0005856]; sarcolemma [GO:0042383]; Z disc [GO:0030018]	actin binding [GO:0003779]; alpha-actinin binding [GO:0051393]	cytoskeleton [GO:0005856]; sarcolemma [GO:0042383]; Z disc [GO:0030018]; actin binding [GO:0003779]; alpha-actinin binding [GO:0051393]	GO:0003779; GO:0005856; GO:0030018; GO:0042383; GO:0051393			cellular organisms (no rank), Eukaryota (superkingdom), Opisthokonta (clade), Metazoa (kingdom), Eumetazoa (clade), Bilateria (clade), Deuterostomia (clade), Chordata (phylum), Craniata (subphylum), Vertebrata (clade), Gnathostomata (clade), Teleostomi (clade), Euteleostomi (clade), Sarcopterygii (superclass), Dipnotetrapodomorpha (clade), Tetrapoda (clade), Amniota (clade), Mammalia (class), The…	131567 (no rank), 2759 (superkingdom), 33154 (clade), 33208 (kingdom), 6072 (clade), 33213 (clade), 33511 (clade), 7711 (phylum), 89593 (subphylum), 7742 (clade), 7776 (clade), 117570 (clade), 117571 (clade), 8287 (superclass), 1338369 (clade), 32523 (clade), 32524 (clade), 40674 (class), 32525 (clade), 9347 (clade), 1437010 (clade), 314146 (superorder), 314147 (clade), 9989 (order), 1963758 (sub…			SUBUNIT: Homodimer. Interacts with ACTA1, ACTN1, FLNA, FLNB, FLNC, and MYOZ2. Interacts with the C-terminal region of MYOZ1 (By similarity). {ECO:0000250}.
Usp14	Up	2.73041	Up	0.363635	Q9JMA1	reviewed	UBP14_MOUSE	Ubiquitin carboxyl-terminal hydrolase 14 (EC 3.4.19.12) (Deubiquitinating enzyme 14) (Ubiquitin thioesterase 14) (Ubiquitin-specific-processing protease 14)	493	chemical synaptic transmission [GO:0007268]; innate immune response [GO:0045087]; negative regulation of ERAD pathway [GO:1904293]; negative regulation of ubiquitin-dependent protein catabolic process [GO:2000059]; proteasome-mediated ubiquitin-dependent protein catabolic process [GO:0043161]; protein K48-linked deubiquitination [GO:0071108]; regulation of chemotaxis [GO:0050920]	cell surface [GO:0009986]; cytoplasmic vesicle [GO:0031410]; endoplasmic reticulum [GO:0005783]; glutamatergic synapse [GO:0098978]; nucleolus [GO:0005730]; plasma membrane [GO:0005886]; presynaptic cytosol [GO:0099523]; proteasome complex [GO:0000502]; synapse [GO:0045202]	cysteine-type deubiquitinase activity [GO:0004843]; endopeptidase inhibitor activity [GO:0004866]; proteasome binding [GO:0070628]	cell surface [GO:0009986]; cytoplasmic vesicle [GO:0031410]; endoplasmic reticulum [GO:0005783]; glutamatergic synapse [GO:0098978]; nucleolus [GO:0005730]; plasma membrane [GO:0005886]; presynaptic cytosol [GO:0099523]; proteasome complex [GO:0000502]; synapse [GO:0045202]; cysteine-type deubiquitinase activity [GO:0004843]; endopeptidase inhibitor activity [GO:0004866]; proteasome binding [GO:0…	GO:0000502; GO:0004843; GO:0004866; GO:0005730; GO:0005783; GO:0005886; GO:0007268; GO:0009986; GO:0031410; GO:0043161; GO:0045087; GO:0045202; GO:0050920; GO:0070628; GO:0071108; GO:0098978; GO:0099523; GO:1904293; GO:2000059	ACT_SITE 114; /note=Nucleophile; /evidence=ECO:0000255|PROSITE-ProRule:PRU10092, ECO:0000255|PROSITE-ProRule:PRU10093; ACT_SITE 434; /note=Proton acceptor; /evidence=ECO:0000255|PROSITE-ProRule:PRU10092, ECO:0000255|PROSITE-ProRule:PRU10093		cellular organisms (no rank), Eukaryota (superkingdom), Opisthokonta (clade), Metazoa (kingdom), Eumetazoa (clade), Bilateria (clade), Deuterostomia (clade), Chordata (phylum), Craniata (subphylum), Vertebrata (clade), Gnathostomata (clade), Teleostomi (clade), Euteleostomi (clade), Sarcopterygii (superclass), Dipnotetrapodomorpha (clade), Tetrapoda (clade), Amniota (clade), Mammalia (class), The…	131567 (no rank), 2759 (superkingdom), 33154 (clade), 33208 (kingdom), 6072 (clade), 33213 (clade), 33511 (clade), 7711 (phylum), 89593 (subphylum), 7742 (clade), 7776 (clade), 117570 (clade), 117571 (clade), 8287 (superclass), 1338369 (clade), 32523 (clade), 32524 (clade), 40674 (class), 32525 (clade), 9347 (clade), 1437010 (clade), 314146 (superorder), 314147 (clade), 9989 (order), 1963758 (sub…			SUBUNIT: Homodimer (Potential). Associates with the 26S proteasome. Interacts with FANCC, CXCR4 and ERN1. Interacts with TRIM14; this interaction recruits USP14 to cleave ubiquitin chains of CGAS and KDM4D (By similarity). {ECO:0000250|UniProtKB:P54578}.
Fhl3	Up	0.817342	Up	1.04059	Q9R059	reviewed	FHL3_MOUSE	Four and a half LIM domains protein 3 (FHL-3) (Skeletal muscle LIM-protein 2) (SLIM-2)	289	actin cytoskeleton organization [GO:0030036]	nucleus [GO:0005634]; stress fiber [GO:0001725]; Z disc [GO:0030018]	actin binding [GO:0003779]; zinc ion binding [GO:0008270]	nucleus [GO:0005634]; stress fiber [GO:0001725]; Z disc [GO:0030018]; actin binding [GO:0003779]; zinc ion binding [GO:0008270]; actin cytoskeleton organization [GO:0030036]	GO:0001725; GO:0003779; GO:0005634; GO:0008270; GO:0030018; GO:0030036			cellular organisms (no rank), Eukaryota (superkingdom), Opisthokonta (clade), Metazoa (kingdom), Eumetazoa (clade), Bilateria (clade), Deuterostomia (clade), Chordata (phylum), Craniata (subphylum), Vertebrata (clade), Gnathostomata (clade), Teleostomi (clade), Euteleostomi (clade), Sarcopterygii (superclass), Dipnotetrapodomorpha (clade), Tetrapoda (clade), Amniota (clade), Mammalia (class), The…	131567 (no rank), 2759 (superkingdom), 33154 (clade), 33208 (kingdom), 6072 (clade), 33213 (clade), 33511 (clade), 7711 (phylum), 89593 (subphylum), 7742 (clade), 7776 (clade), 117570 (clade), 117571 (clade), 8287 (superclass), 1338369 (clade), 32523 (clade), 32524 (clade), 40674 (class), 32525 (clade), 9347 (clade), 1437010 (clade), 314146 (superorder), 314147 (clade), 9989 (order), 1963758 (sub…		P43267	SUBUNIT: Interacts with SOX15; the interaction recruits FHL3 to FOXK1 promoters where it acts as a transcriptional coactivator of FOXK1. {ECO:0000269|PubMed:17363903}.
Ankrd2	Up	3.9106	Up	0.836302	Q9WV06	reviewed	ANKR2_MOUSE	Ankyrin repeat domain-containing protein 2 (Skeletal muscle ankyrin repeat protein) (mArpp)	328	myotube differentiation [GO:0014902]; negative regulation of myoblast differentiation [GO:0045662]; negative regulation of myotube differentiation [GO:0010832]; negative regulation of transcription by RNA polymerase II [GO:0000122]; regulation of cytokine production [GO:0001817]; regulation of intrinsic apoptotic signaling pathway by p53 class mediator [GO:1902253]; regulation of myoblast prolife…	cytosol [GO:0005829]; euchromatin [GO:0000791]; I band [GO:0031674]; myofibril [GO:0030016]; nucleus [GO:0005634]; PML body [GO:0016605]; sarcomere [GO:0030017]; sarcoplasm [GO:0016528]	chromatin binding [GO:0003682]; protein kinase B binding [GO:0043422]; RNA polymerase II-specific DNA-binding transcription factor binding [GO:0061629]; titin binding [GO:0031432]	cytosol [GO:0005829]; euchromatin [GO:0000791]; I band [GO:0031674]; myofibril [GO:0030016]; nucleus [GO:0005634]; PML body [GO:0016605]; sarcomere [GO:0030017]; sarcoplasm [GO:0016528]; chromatin binding [GO:0003682]; protein kinase B binding [GO:0043422]; RNA polymerase II-specific DNA-binding transcription factor binding [GO:0061629]; titin binding [GO:0031432]; myotube differentiation [GO:001…	GO:0000122; GO:0000791; GO:0001817; GO:0003682; GO:0005634; GO:0005829; GO:0006357; GO:0010832; GO:0014902; GO:0016528; GO:0016605; GO:0030016; GO:0030017; GO:0031432; GO:0031674; GO:0035914; GO:0035994; GO:0043422; GO:0045662; GO:0061629; GO:1902253; GO:2000291			cellular organisms (no rank), Eukaryota (superkingdom), Opisthokonta (clade), Metazoa (kingdom), Eumetazoa (clade), Bilateria (clade), Deuterostomia (clade), Chordata (phylum), Craniata (subphylum), Vertebrata (clade), Gnathostomata (clade), Teleostomi (clade), Euteleostomi (clade), Sarcopterygii (superclass), Dipnotetrapodomorpha (clade), Tetrapoda (clade), Amniota (clade), Mammalia (class), The…	131567 (no rank), 2759 (superkingdom), 33154 (clade), 33208 (kingdom), 6072 (clade), 33213 (clade), 33511 (clade), 7711 (phylum), 89593 (subphylum), 7742 (clade), 7776 (clade), 117570 (clade), 117571 (clade), 8287 (superclass), 1338369 (clade), 32523 (clade), 32524 (clade), 40674 (class), 32525 (clade), 9347 (clade), 1437010 (clade), 314146 (superorder), 314147 (clade), 9989 (order), 1963758 (sub…	PTM: Phosphorylation at Ser-68 by PKB/AKT2 in response to oxidative stress induces translocation to the nucleus and negatively regulates myoblast differentiation. {ECO:0000250}.	P41133	SUBUNIT: Interacts with ID3; both proteins cooperate in myoblast differentiation. Interacts with TTN/titin (By similarity). Interacts (via ANK repeats) with TCAP; the interaction is direct (By similarity). Interacts with TJP1 (via PDZ domains) (By similarity). Interacts with PML; the interaction is direct (By similarity). Interacts with p53/TP53 (By similarity). Interacts with YBX1 (By similarity…
Pla1a	Down	-0.869482	Down	-0.91956	P97823	reviewed	LYPA1_MOUSE	Acyl-protein thioesterase 1 (APT-1) (EC 3.1.2.-) (Lysophospholipase 1) (Lysophospholipase I) (LPL-I) (LysoPLA I) (Palmitoyl-protein hydrolase) (EC 3.1.2.22)	230	fatty acid metabolic process [GO:0006631]; fatty acid transport [GO:0015908]; negative regulation of aggrephagy [GO:1905336]; negative regulation of Golgi to plasma membrane protein transport [GO:0042997]; protein depalmitoylation [GO:0002084]	cytosol [GO:0005829]; endoplasmic reticulum [GO:0005783]; mitochondrion [GO:0005739]; nuclear membrane [GO:0031965]; nucleoplasm [GO:0005654]; plasma membrane [GO:0005886]	lysophospholipase activity [GO:0004622]; palmitoyl-(protein) hydrolase activity [GO:0008474]; phospholipase activity [GO:0004620]	cytosol [GO:0005829]; endoplasmic reticulum [GO:0005783]; mitochondrion [GO:0005739]; nuclear membrane [GO:0031965]; nucleoplasm [GO:0005654]; plasma membrane [GO:0005886]; lysophospholipase activity [GO:0004622]; palmitoyl-(protein) hydrolase activity [GO:0008474]; phospholipase activity [GO:0004620]; fatty acid metabolic process [GO:0006631]; fatty acid transport [GO:0015908]; negative regulati…	GO:0002084; GO:0004620; GO:0004622; GO:0005654; GO:0005739; GO:0005783; GO:0005829; GO:0005886; GO:0006631; GO:0008474; GO:0015908; GO:0031965; GO:0042997; GO:1905336	ACT_SITE 119; /note=Charge relay system; /evidence=ECO:0000269|PubMed:9139730; ACT_SITE 174; /note=Charge relay system; /evidence=ECO:0000269|PubMed:9268342; ACT_SITE 208; /note=Charge relay system; /evidence=ECO:0000269|PubMed:9268342		cellular organisms (no rank), Eukaryota (superkingdom), Opisthokonta (clade), Metazoa (kingdom), Eumetazoa (clade), Bilateria (clade), Deuterostomia (clade), Chordata (phylum), Craniata (subphylum), Vertebrata (clade), Gnathostomata (clade), Teleostomi (clade), Euteleostomi (clade), Sarcopterygii (superclass), Dipnotetrapodomorpha (clade), Tetrapoda (clade), Amniota (clade), Mammalia (class), The…	131567 (no rank), 2759 (superkingdom), 33154 (clade), 33208 (kingdom), 6072 (clade), 33213 (clade), 33511 (clade), 7711 (phylum), 89593 (subphylum), 7742 (clade), 7776 (clade), 117570 (clade), 117571 (clade), 8287 (superclass), 1338369 (clade), 32523 (clade), 32524 (clade), 40674 (class), 32525 (clade), 9347 (clade), 1437010 (clade), 314146 (superorder), 314147 (clade), 9989 (order), 1963758 (sub…			SUBUNIT: Homodimer. {ECO:0000250|UniProtKB:O75608}.
Taco1	Down	-1.21749	Down	-0.817502	Q8K0Z7	reviewed	TACO1_MOUSE	Translational activator of cytochrome c oxidase 1 (Coiled-coil domain-containing protein 44) (Translational activator of mitochondrially-encoded cytochrome c oxidase 1)	294	mitochondrial cytochrome c oxidase assembly [GO:0033617]; motor learning [GO:0061743]; regulation of mitochondrial translation [GO:0070129]	mitochondrion [GO:0005739]	mitochondrial ribosome binding [GO:0097177]; mRNA binding [GO:0003729]; rRNA binding [GO:0019843]	mitochondrion [GO:0005739]; mitochondrial ribosome binding [GO:0097177]; mRNA binding [GO:0003729]; rRNA binding [GO:0019843]; mitochondrial cytochrome c oxidase assembly [GO:0033617]; motor learning [GO:0061743]; regulation of mitochondrial translation [GO:0070129]	GO:0003729; GO:0005739; GO:0019843; GO:0033617; GO:0061743; GO:0070129; GO:0097177			cellular organisms (no rank), Eukaryota (superkingdom), Opisthokonta (clade), Metazoa (kingdom), Eumetazoa (clade), Bilateria (clade), Deuterostomia (clade), Chordata (phylum), Craniata (subphylum), Vertebrata (clade), Gnathostomata (clade), Teleostomi (clade), Euteleostomi (clade), Sarcopterygii (superclass), Dipnotetrapodomorpha (clade), Tetrapoda (clade), Amniota (clade), Mammalia (class), The…	131567 (no rank), 2759 (superkingdom), 33154 (clade), 33208 (kingdom), 6072 (clade), 33213 (clade), 33511 (clade), 7711 (phylum), 89593 (subphylum), 7742 (clade), 7776 (clade), 117570 (clade), 117571 (clade), 8287 (superclass), 1338369 (clade), 32523 (clade), 32524 (clade), 40674 (class), 32525 (clade), 9347 (clade), 1437010 (clade), 314146 (superorder), 314147 (clade), 9989 (order), 1963758 (sub…
Oxct1	Down	-1.10698	Down	-0.838177	Q9D0K2	reviewed	SCOT1_MOUSE	Succinyl-CoA:3-ketoacid coenzyme A transferase 1, mitochondrial (SCOT) (EC 2.8.3.5) (3-oxoacid CoA-transferase 1) (Somatic-type succinyl-CoA:3-oxoacid CoA-transferase) (SCOT-s) (Succinyl-CoA:3-oxoacid CoA transferase)	520	ketone body catabolic process [GO:0046952]; ketone body metabolic process [GO:1902224]; ketone catabolic process [GO:0042182]	mitochondrion [GO:0005739]	succinyl-CoA:3-oxo-acid CoA-transferase activity [GO:0008260]	mitochondrion [GO:0005739]; succinyl-CoA:3-oxo-acid CoA-transferase activity [GO:0008260]; ketone body catabolic process [GO:0046952]; ketone body metabolic process [GO:1902224]; ketone catabolic process [GO:0042182]	GO:0005739; GO:0008260; GO:0042182; GO:0046952; GO:1902224	ACT_SITE 344; /note=5-glutamyl coenzyme A thioester intermediate; /evidence=ECO:0000255|PROSITE-ProRule:PRU10034		cellular organisms (no rank), Eukaryota (superkingdom), Opisthokonta (clade), Metazoa (kingdom), Eumetazoa (clade), Bilateria (clade), Deuterostomia (clade), Chordata (phylum), Craniata (subphylum), Vertebrata (clade), Gnathostomata (clade), Teleostomi (clade), Euteleostomi (clade), Sarcopterygii (superclass), Dipnotetrapodomorpha (clade), Tetrapoda (clade), Amniota (clade), Mammalia (class), The…	131567 (no rank), 2759 (superkingdom), 33154 (clade), 33208 (kingdom), 6072 (clade), 33213 (clade), 33511 (clade), 7711 (phylum), 89593 (subphylum), 7742 (clade), 7776 (clade), 117570 (clade), 117571 (clade), 8287 (superclass), 1338369 (clade), 32523 (clade), 32524 (clade), 40674 (class), 32525 (clade), 9347 (clade), 1437010 (clade), 314146 (superorder), 314147 (clade), 9989 (order), 1963758 (sub…			SUBUNIT: Homodimer. Only one subunit is competent to transfer the CoA moiety to the acceptor carboxylate (3-oxo acid). {ECO:0000250|UniProtKB:Q29551}.
