# Supplementary material for: Knock-in Mouse Model of Hereditary Myopathy with Early Respiratory Failure Carrying the Titin Variant Corresponding to Human p.N31786K
Source: Research Square preprint supplement (doi:10.21203/rs.3.rs-8910535/v1), 2026-02-23
Supplement: Supplementary file 3 [file bdbae5716bfab3e2bfb4dc12.xlsx]

## Sheet: Sheet1
gene_name	gene_id	lsv_id	mean_dpsi_per_lsv_junction	probability_changing	probability_non_changing	Control_mean_psi	HOM_mean_psi	lsv_type	num_junctions	num_exons	de_novo_junctions	seqid	strand	junctions_coords	exons_coords	ir_coords	ucsc_lsv_link
Ppfibp1	ENSMUSG00000016487.16	ENSMUSG00000016487.16:s:146897888-146897980	0.3106;-0.3106	9.989e-01;9.989e-01	2.754e-20;0.000e+00	0.3503;0.6497	0.6613;0.3387	s|1e1.1o1|1e2.1o1	2	3	0;0	chr6	+	146897980-146898307;146897980-146899665	146897888-146897980;146898307-146898399;146899665-146899779		http://genome.ucsc.edu/cgi-bin/hgTracks?db=GRCm39&position=chr6%3A146899779-146897888
Ppfibp1	ENSMUSG00000016487.16	ENSMUSG00000016487.16:t:146899665-146899779	-0.2845;0.2845	9.823e-01;9.823e-01	1.299e-14;6.689e-15	0.6433;0.3567	0.3567;0.6433	t|1e1.1o1|1e2.1o1	2	3	0;0	chr6	+	146897980-146899665;146898399-146899665	146897888-146897980;146898307-146898399;146899665-146899779		http://genome.ucsc.edu/cgi-bin/hgTracks?db=GRCm39&position=chr6%3A146899779-146897888
Ppfibp1	ENSMUSG00000016487.16	ENSMUSG00000016487.16:t:146901813-146902507	0.2166;-0.2166	6.247e-01;6.247e-01	1.135e-06;1.136e-06	0.6347;0.3653	0.8481;0.1519	t|1e1.1o1|1e2.1o1	2	3	0;0	chr6	+	146899779-146902439;146901192-146902439	146899665-146899779;146901043-146901192;146901813-146902507		http://genome.ucsc.edu/cgi-bin/hgTracks?db=GRCm39&position=chr6%3A146902507-146899665
Vps39	ENSMUSG00000027291.16	ENSMUSG00000027291.16:s:120180645-120180710	0.0002;-0.0001;0.2001;-0.1958	4.904e-21;4.880e-21;5.029e-01;4.890e-01	9.898e-01;9.943e-01;4.401e-03;5.722e-03	0.0095;0.0155;0.4771;0.4920	0.0232;0.0007;0.6889;0.2906	s|1e1.1o1|1e2.1o1|1e3.1o1|1e4.1o1	4	5	0;0;0;0	chr2	-	120179636-120180645;120179013-120180645;120177370-120180645;120176873-120180645	120176809-120176873;120177338-120177370;120178948-120179013;120179567-120179636;120180645-120180710		http://genome.ucsc.edu/cgi-bin/hgTracks?db=GRCm39&position=chr2%3A120180710-120176809
Stim1	ENSMUSG00000030987.6	ENSMUSG00000030987.6:s:102076289-102077455	0.3275;-0.3275	9.959e-01;9.959e-01	6.172e-16;0.000e+00	0.1211;0.8789	0.4491;0.5509	s|1e1.1o1|1e2.1o1	2	3	0;0	chr7	+	102076524-102077981;102076524-102080092	102076289-102077455;102077981-102078073;102079958-102080482		http://genome.ucsc.edu/cgi-bin/hgTracks?db=GRCm39&position=chr7%3A102080482-102076289
Stim1	ENSMUSG00000030987.6	ENSMUSG00000030987.6:t:102079958-102080482	-0.3825;0.3825	9.997e-01;9.997e-01	0.000e+00;4.875e-20	0.8105;0.1895	0.4352;0.5648	t|1e1.1o1|1e2.1o1	2	3	0;0	chr7	+	102076524-102080092;102078073-102080092	102076289-102077455;102077981-102078073;102079958-102080482		http://genome.ucsc.edu/cgi-bin/hgTracks?db=GRCm39&position=chr7%3A102080482-102076289
Pik3r1	ENSMUSG00000041417.16	ENSMUSG00000041417.16:t:101826643-101827091	0.2603;-0.0633;-0.0000;-0.1594	9.284e-01;1.951e-08;4.842e-21;1.301e-01	1.700e-17;2.928e-01;1.000e+00;7.250e-06	0.7194;0.0917;0.0070;0.1846	0.9821;0.0060;0.0021;0.0102	t|1e1.1o1|1e2.1o1|1e3.1o1|1e4.1o1	4	5	0;0;0;0	chr13	-	101827091-101837955;101827091-101830884;101827091-101828955;101827091-101828691	101826643-101827091;101828691-101828851;101828955-101829138;101830884-101831108;101837955-101838034		http://genome.ucsc.edu/cgi-bin/hgTracks?db=GRCm39&position=chr13%3A101838034-101826643
Ssr1	ENSMUSG00000021427.11	ENSMUSG00000021427.11:s:38167369-38167462	0.2197;-0.2200;0.0000	6.545e-01;6.564e-01;4.842e-21	2.451e-05;2.303e-05;1.000e+00	0.6487;0.3508;0.0005	0.8760;0.1232;0.0008	s|1e1.1o1|1e2.1o1|1e3.1o1	3	4	0;0;0	chr13	-	38167085-38167369;38163782-38167369;38151459-38167369	38150581-38151459;38155377-38163782;38167071-38167085;38167369-38167462		http://genome.ucsc.edu/cgi-bin/hgTracks?db=GRCm39&position=chr13%3A38167462-38150581
Ssr1	ENSMUSG00000021427.11	ENSMUSG00000021427.11:t:38155377-38163782	-0.2293;0.2293	7.366e-01;7.366e-01	2.228e-06;2.228e-06	0.3772;0.6228	0.1436;0.8564	t|1e1.1o1|1e2.1o1	2	3	0;0	chr13	-	38163782-38167369;38163782-38167071	38155377-38163782;38167071-38167085;38167369-38167462		http://genome.ucsc.edu/cgi-bin/hgTracks?db=GRCm39&position=chr13%3A38167462-38155377
Huwe1	ENSMUSG00000025261.19	ENSMUSG00000025261.19:s:150640804-150640909	-0.3336;0.3336	9.989e-01;9.989e-01	0.000e+00;1.130e-16	0.8480;0.1520	0.5170;0.4830	s|1e1.1o1|1e2.1o1	2	3	0;0	chrX	+	150640909-150642451;150640909-150643163	150640804-150640909;150642451-150642684;150643163-150643542		http://genome.ucsc.edu/cgi-bin/hgTracks?db=GRCm39&position=chrX%3A150643542-150640804
Huwe1	ENSMUSG00000025261.19	ENSMUSG00000025261.19:t:150643163-150643542	0.2228;-0.2228	6.877e-01;6.877e-01	1.389e-08;1.389e-08	0.1083;0.8917	0.3392;0.6608	t|1e1.1o1|1e2.1o1	2	3	0;0	chrX	+	150640909-150643163;150642684-150643163	150640804-150640909;150642451-150642684;150643163-150643542		http://genome.ucsc.edu/cgi-bin/hgTracks?db=GRCm39&position=chrX%3A150643542-150640804
Raph1	ENSMUSG00000026014.16	ENSMUSG00000026014.16:t:60542677-60542754	-0.3381;0.3381	9.816e-01;9.816e-01	2.682e-09;2.669e-09	0.4726;0.5274	0.1410;0.8590	t|1e1.1o1|1e2.1o1	2	3	0;0	chr1	-	60542754-60564751;60542754-60549576	60542677-60542754;60549576-60549650;60564751-60565259		http://genome.ucsc.edu/cgi-bin/hgTracks?db=GRCm39&position=chr1%3A60565259-60542677
Lmo7	ENSMUSG00000033060.18	ENSMUSG00000033060.18:s:102121488-102121850	0.2072;-0.2043;0.0000	5.869e-01;5.613e-01;4.842e-21	1.256e-07;2.037e-07;1.000e+00	0.6625;0.3326;0.0048	0.8709;0.1270;0.0026	s|1e1.1o1|1e2.1o1|1e3.1o1	3	4	0;0;0	chr14	+	102121850-102122727;102121850-102126113;102121850-102133903	102121488-102121850;102122727-102123269;102126113-102126142;102133903-102134020		http://genome.ucsc.edu/cgi-bin/hgTracks?db=GRCm39&position=chr14%3A102134020-102121488
Lmo7	ENSMUSG00000033060.18	ENSMUSG00000033060.18:s:102149435-102150113	0.2013;-0.2013	5.213e-01;5.213e-01	1.757e-04;1.757e-04	0.2760;0.7240	0.4780;0.5220	s|1e1.1o2|1e1.2o2	2	2	0;0	chr14	+	102149596-102150595;102149596-102150676	102149435-102150113;102150595-102150782		http://genome.ucsc.edu/cgi-bin/hgTracks?db=GRCm39&position=chr14%3A102150782-102149435
Pank2	ENSMUSG00000037514.19	ENSMUSG00000037514.19:t:131115831-131116040	-0.2294;0.2294	7.296e-01;7.296e-01	2.871e-06;2.871e-06	0.8719;0.1281	0.6405;0.3595	t|1e1.1o1|1e2.1o1	2	3	0;0	chr2	+	131104735-131115831;131113571-131115831	131104415-131104735;131113479-131113571;131115831-131116040		http://genome.ucsc.edu/cgi-bin/hgTracks?db=GRCm39&position=chr2%3A131116040-131104415
Ablim1	ENSMUSG00000025085.17	ENSMUSG00000025085.17:s:57068245-57068303	0.2924;-0.2923;0.0000	9.905e-01;9.903e-01;4.842e-21	2.824e-20;0.000e+00;1.000e+00	0.4630;0.5367;0.0002	0.7492;0.2507;0.0001	s|1e1.1o1|1e2.1o1|1e3.1o1	3	4	0;0;0	chr19	-	57065929-57068245;57057369-57068245;57056678-57068245	57056523-57056678;57057292-57057369;57065734-57065929;57068245-57068303		http://genome.ucsc.edu/cgi-bin/hgTracks?db=GRCm39&position=chr19%3A57068303-57056523
Ablim1	ENSMUSG00000025085.17	ENSMUSG00000025085.17:t:57057292-57057369	-0.2771;0.2109;0.0504	9.707e-01;6.219e-01;1.768e-20	0.000e+00;2.600e-12;4.717e-01	0.5073;0.4191;0.0714	0.2349;0.6374;0.1287	t|1e1.1o1|1e2.1o1|1e3.1o1	3	4	0;0;0	chr19	-	57057369-57068245;57057369-57065846;57057369-57062287	57057292-57057369;57062287-57062334;57065734-57065929;57068245-57068303		http://genome.ucsc.edu/cgi-bin/hgTracks?db=GRCm39&position=chr19%3A57068303-57057292
Arhgef2	ENSMUSG00000028059.17	ENSMUSG00000028059.17:t:88537094-88537238	0.2382;-0.1605;-0.0209;-0.0081;0.0000;-0.0000;0.0000	7.583e-01;2.164e-01;1.132e-07;7.311e-21;4.842e-21;4.842e-21;4.842e-21	3.017e-06;4.824e-03;5.016e-01;7.614e-01;1.000e+00;1.000e+00;1.000e+00	0.3784;0.4293;0.1437;0.0469;0.0002;0.0055;0.0002	0.6208;0.2692;0.1026;0.0108;0.0002;0.0018;0.0002	t|1e1.1o1|1e2.1o1|1e3.1o1|1e4.1o1|1e5.1o1|1e6.1o1|1e7.1o1	7	8	0;0;0;0;0;0;0	chr3	+	88523961-88537094;88528628-88537094;88528906-88537094;88529904-88537094;88530703-88537094;88536870-88537094;88536997-88537094	88523824-88523961;88528413-88528628;88528743-88528906;88529766-88529904;88530661-88530703;88536749-88536870;88536878-88536997;88537094-88537238		http://genome.ucsc.edu/cgi-bin/hgTracks?db=GRCm39&position=chr3%3A88537238-88523824
Ppfia1	ENSMUSG00000037519.18	ENSMUSG00000037519.18:t:144030495-144031726	0.2257;-0.2257	6.552e-01;6.552e-01	7.373e-05;7.373e-05	0.5321;0.4679	0.7548;0.2452	t|1e1.1o1|1e2.1o1	2	3	0;0	chr7	-	144031726-144034822;144031726-144032764	144030495-144031726;144032764-144032855;144034822-144034987		http://genome.ucsc.edu/cgi-bin/hgTracks?db=GRCm39&position=chr7%3A144034987-144030495
Sorbs1	ENSMUSG00000025006.19	ENSMUSG00000025006.19:t:40322476-40325479	-0.2100;0.0000;0.2038	5.888e-01;4.842e-21;5.311e-01	5.965e-11;1.000e+00;3.889e-12	0.2573;0.0041;0.7380	0.0477;0.0039;0.9470	t|1e1.1o1|1e2.1o1|1e3.1o1	3	4	0;0;0	chr19	-	40325479-40338343;40325479-40329129;40325479-40328489	40322476-40325479;40328489-40329038;40329129-40329194;40338343-40338457		http://genome.ucsc.edu/cgi-bin/hgTracks?db=GRCm39&position=chr19%3A40338457-40322476
Ankrd28	ENSMUSG00000014496.9	ENSMUSG00000014496.9:t:31499058-31500962	-0.2289;0.0183;0.1788	7.128e-01;9.889e-21;3.542e-01	1.088e-05;6.245e-01;2.563e-03	0.6670;0.0056;0.3297	0.4286;0.0526;0.5135	t|1e1.1o1|1e2.1o1|1e3.1o1	3	4	0;0;0	chr14	-	31500962-31552284;31500962-31503660;31500962-31502122	31499058-31500962;31502122-31503506;31503660-31503872;31552284-31552608		http://genome.ucsc.edu/cgi-bin/hgTracks?db=GRCm39&position=chr14%3A31552608-31499058
Ss18	ENSMUSG00000037013.18	ENSMUSG00000037013.18:t:14769553-14769675	-0.2605;0.2605	8.084e-01;8.084e-01	1.487e-04;1.487e-04	0.5019;0.4981	0.2331;0.7669	t|1e1.1o1|1e2.1o1	2	3	0;0	chr18	-	14769675-14773314;14769675-14770449	14769553-14769675;14770449-14770541;14772027-14773418		http://genome.ucsc.edu/cgi-bin/hgTracks?db=GRCm39&position=chr18%3A14773418-14769553
Plekha1	ENSMUSG00000040268.18	ENSMUSG00000040268.18:t:130512562-130515042	0.0000;-0.2188;0.0608;0.1280	4.842e-21;6.482e-01;7.524e-05;4.274e-02	1.000e+00;3.934e-05;2.455e-01;1.575e-02	0.0010;0.9622;0.0095;0.0278	0.0050;0.7417;0.0948;0.1602	t|1e1.1o1|1e2.1o3|1e2.2o3|1e2.3o3	4	3	0;0;0;0	chr7	+	130510155-130512562;130511358-130512562;130511388-130512562;130511465-130512562	130510066-130510630;130511318-130511551;130512562-130515042		http://genome.ucsc.edu/cgi-bin/hgTracks?db=GRCm39&position=chr7%3A130515042-130510066
2210408F21Rik	ENSMUSG00000087380.9	ENSMUSG00000087380.9:t:31261938-31262217	0.1931;0.0204;0.0000;-0.2187	4.506e-01;7.125e-09;4.842e-21;6.414e-01	8.687e-04;5.819e-01;1.000e+00;2.309e-04	0.1231;0.0371;0.0005;0.8388	0.3235;0.0612;0.0007;0.6145	t|1e1.1o1|1e2.1o1|1e3.1o1|1e4.1o1	4	5	0;0;0;0	chr6	+	31197454-31261938;31221293-31261938;31226871-31261938;31254890-31261938	31197244-31199021;31221040-31221293;31226753-31226871;31254783-31254890;31261938-31262217		http://genome.ucsc.edu/cgi-bin/hgTracks?db=GRCm39&position=chr6%3A31262217-31197244
Itgb1	ENSMUSG00000025809.16	ENSMUSG00000025809.16:s:129452501-129452667	0.3954;-0.3954	1.000e+00;1.000e+00	2.438e-20;0.000e+00	0.2375;0.7625	0.6212;0.3788	s|1e1.1o1|1e2.1o1	2	3	0;0	chr8	+	129452667-129453464;129452667-129458504	129452501-129452667;129453464-129453544;129458504-129459681		http://genome.ucsc.edu/cgi-bin/hgTracks?db=GRCm39&position=chr8%3A129459681-129452501
Itgb1	ENSMUSG00000025809.16	ENSMUSG00000025809.16:t:129458504-129459681	-0.3654;0.3654	1.000e+00;1.000e+00	0.000e+00;2.554e-20	0.6144;0.3856	0.2555;0.7445	t|1e1.1o1|1e2.1o1	2	3	0;0	chr8	+	129452667-129458504;129453544-129458504	129452501-129452667;129453464-129453544;129458504-129459681		http://genome.ucsc.edu/cgi-bin/hgTracks?db=GRCm39&position=chr8%3A129459681-129452501
Pcmtd1	ENSMUSG00000051285.18	ENSMUSG00000051285.18:s:7159144-7159440	-0.2258;0.2247;0.0000	7.174e-01;7.090e-01;4.842e-21	2.252e-09;2.719e-09;1.000e+00	0.8502;0.1496;0.0002	0.6240;0.3744;0.0014	s|1e1.1o1|1e2.1o1|1e3.1o1	3	4	0;0;0	chr1	+	7159440-7190418;7159440-7217861;7159440-7239739	7159144-7159440;7190418-7190839;7217861-7217963;7239739-7243852		http://genome.ucsc.edu/cgi-bin/hgTracks?db=GRCm39&position=chr1%3A7243852-7159144
Pcmtd1	ENSMUSG00000051285.18	ENSMUSG00000051285.18:t:7217861-7217963	0.2493;-0.2493	8.316e-01;8.316e-01	2.849e-07;2.846e-07	0.2538;0.7462	0.5101;0.4899	t|1e1.1o1|1e2.1o1	2	3	0;0	chr1	+	7159440-7217861;7190839-7217861	7159144-7159440;7190418-7190839;7217861-7217963		http://genome.ucsc.edu/cgi-bin/hgTracks?db=GRCm39&position=chr1%3A7217963-7159144
Zfp207	ENSMUSG00000017421.19	ENSMUSG00000017421.19:s:80282661-80282818	0.2427;-0.2427	7.930e-01;7.930e-01	5.498e-06;5.498e-06	0.4779;0.5221	0.7209;0.2791	s|1e1.1o1|1e2.1o1	2	3	0;0	chr11	+	80282818-80283910;80282818-80285112	80282661-80282818;80283910-80285109;80285112-80285357		http://genome.ucsc.edu/cgi-bin/hgTracks?db=GRCm39&position=chr11%3A80285357-80282661
Anxa7	ENSMUSG00000021814.18	ENSMUSG00000021814.18:s:20517939-20518003	0.5302;-0.5302	1.000e+00;1.000e+00	1.909e-20;0.000e+00	0.2856;0.7144	0.8041;0.1959	s|1e1.1o1|1e2.1o1	2	3	0;0	chr14	-	20517591-20517939;20515014-20517939	20514912-20515014;20517350-20517591;20517939-20518003		http://genome.ucsc.edu/cgi-bin/hgTracks?db=GRCm39&position=chr14%3A20518003-20514912
Anxa7	ENSMUSG00000021814.18	ENSMUSG00000021814.18:t:20514912-20515014	-0.5599;0.5599	1.000e+00;1.000e+00	0.000e+00;1.799e-20	0.7061;0.2939	0.1568;0.8432	t|1e1.1o1|1e2.1o1	2	3	0;0	chr14	-	20515014-20517939;20515014-20517526	20514912-20515014;20517350-20517591;20517939-20518003		http://genome.ucsc.edu/cgi-bin/hgTracks?db=GRCm39&position=chr14%3A20518003-20514912
Ankrd10	ENSMUSG00000031508.15	ENSMUSG00000031508.15:s:11677669-11678530	0.0527;0.2350;-0.3093	3.586e-06;7.476e-01;9.747e-01	3.428e-01;1.078e-05;6.579e-09	0.0111;0.0488;0.9411	0.0816;0.2849;0.6411	s|1e1.1o1|1e2.1o1|1e3.1o1	3	4	0;0;0	chr8	-	11673858-11678439;11670373-11678439;11669297-11678439	11669062-11669297;11670262-11670373;11673697-11674626;11677669-11678530		http://genome.ucsc.edu/cgi-bin/hgTracks?db=GRCm39&position=chr8%3A11678530-11669062
Ankrd10	ENSMUSG00000031508.15	ENSMUSG00000031508.15:t:11669062-11669297	-0.2546;0.1108;0.1327	8.399e-01;2.913e-02;1.134e-01	6.459e-06;4.767e-02;2.651e-02	0.5902;0.1758;0.2319	0.3360;0.2963;0.3665	t|1e1.1o1|1e2.1o1|1e3.1o1	3	4	0;0;0	chr8	-	11669297-11678439;11669297-11673697;11669297-11670262	11669062-11669297;11670262-11670373;11673697-11674626;11677669-11678530		http://genome.ucsc.edu/cgi-bin/hgTracks?db=GRCm39&position=chr8%3A11678530-11669062
Ankrd10	ENSMUSG00000031508.15	ENSMUSG00000031508.15:t:11682866-11683018	-0.2039;0.1969;0.0001	5.221e-01;4.749e-01;4.856e-21	6.189e-04;1.161e-03;9.976e-01	0.7924;0.1956;0.0129	0.5832;0.3987;0.0183	t|1e1.1o1|1e2.1o1|1e3.1o1	3	4	0;0;0	chr8	-	11683018-11685411;11683018-11684811;11683018-11683653	11682866-11683018;11683653-11683950;11684811-11685036;11685411-11685757		http://genome.ucsc.edu/cgi-bin/hgTracks?db=GRCm39&position=chr8%3A11685757-11682866
Stim2	ENSMUSG00000039156.20	ENSMUSG00000039156.20:s:54267045-54267212	0.2819;-0.2819	9.190e-01;9.190e-01	6.755e-07;6.754e-07	0.4065;0.5935	0.6961;0.3039	s|1e1.1o1|1e2.1o1	2	3	0;0	chr5	+	54267212-54267458;54267212-54267879	54267045-54267212;54267458-54267481;54267879-54267979		http://genome.ucsc.edu/cgi-bin/hgTracks?db=GRCm39&position=chr5%3A54267979-54267045
Stim2	ENSMUSG00000039156.20	ENSMUSG00000039156.20:t:54267879-54267979	-0.2671;0.2671	8.719e-01;8.719e-01	4.587e-07;4.587e-07	0.5534;0.4466	0.2721;0.7279	t|1e1.1o1|1e2.1o1	2	3	0;0	chr5	+	54267212-54267879;54267481-54267879	54267045-54267212;54267458-54267481;54267879-54267979		http://genome.ucsc.edu/cgi-bin/hgTracks?db=GRCm39&position=chr5%3A54267979-54267045
Rapgef1	ENSMUSG00000039844.21	ENSMUSG00000039844.21:s:29597210-29597412	0.2145;0.0604;-0.2874	6.171e-01;2.060e-04;9.879e-01	2.557e-07;1.988e-01;6.661e-16	0.2731;0.2894;0.4322	0.4817;0.3653;0.1513	s|1e1.1o2|1e1.2o2|1e2.1o1	3	3	0;0;0	chr2	+	29597412-29600165;29597412-29600168;29597412-29612236	29597210-29597412;29600165-29600320;29612236-29612321		http://genome.ucsc.edu/cgi-bin/hgTracks?db=GRCm39&position=chr2%3A29612321-29597210
Ift20	ENSMUSG00000001105.16	ENSMUSG00000001105.16:t:78429638-78429788	0.0000;-0.2339;0.2371	4.842e-21;7.249e-01;7.425e-01	1.000e+00;3.157e-05;3.182e-05	0.0075;0.4019;0.5919	0.0050;0.1685;0.8266	t|1e2.1o1|2e1.1o1|2e2.1o1	3	3	0;0;0	chr11	+	78429564-78429638;78427402-78429660;78429564-78429660	78427187-78427402;78429336-78429564;78429638-78429788		http://genome.ucsc.edu/cgi-bin/hgTracks?db=GRCm39&position=chr11%3A78429788-78427187
Dcaf6	ENSMUSG00000026571.13	ENSMUSG00000026571.13:s:165216227-165216484	0.2921;-0.0000;-0.0210;-0.2442	9.803e-01;4.844e-21;1.052e-20;8.528e-01	3.608e-15;9.997e-01;5.585e-01;3.396e-13	0.4653;0.0259;0.1042;0.4081	0.7497;0.0229;0.0612;0.1638	s|1e1.1o1|1e2.1o1|1e3.1o1|1e4.1o1	4	5	0;0;0;0	chr1	-	165201804-165216227;165198817-165216227;165195074-165216227;165185115-165216227	165184998-165185115;165194611-165195074;165198692-165198817;165201631-165201804;165216227-165216484		http://genome.ucsc.edu/cgi-bin/hgTracks?db=GRCm39&position=chr1%3A165216484-165184998
Nrep	ENSMUSG00000042834.16	ENSMUSG00000042834.16:t:33596431-33596488	0.2976;-0.2976	9.802e-01;9.802e-01	2.474e-15;0.000e+00	0.4849;0.5151	0.7769;0.2231	t|1e1.1o1|1e2.1o1	2	3	0;0	chr18	-	33596472-33596906;33596472-33596653	33596431-33596488;33596653-33596792;33596906-33597082		http://genome.ucsc.edu/cgi-bin/hgTracks?db=GRCm39&position=chr18%3A33597082-33596431
Myl6	ENSMUSG00000090841.3	ENSMUSG00000090841.3:s:128329408-128329662	0.2705;0.0000;-0.2748;0.0000;0.0000;0.0000	9.985e-01;4.842e-21;9.981e-01;4.842e-21;4.842e-21;4.842e-21	2.927e-20;1.000e+00;0.000e+00;1.000e+00;1.000e+00;1.000e+00	0.2689;0.0004;0.7236;0.0034;0.0009;0.0031	0.5359;0.0001;0.4568;0.0001;0.0001;0.0060	s|1e1.1o1|1e2.1o1|1e3.1o2|1e3.2o2|1e4.1o2|1e4.2o2	6	5	0;0;0;0;0;0	chr10	-	128329222-128329408;128328914-128329408;128328614-128329408;128328578-128329408;128328404-128329408;128328271-128329408	128328097-128328404;128328471-128328614;128328808-128328914;128329203-128329222;128329408-128329662		http://genome.ucsc.edu/cgi-bin/hgTracks?db=GRCm39&position=chr10%3A128329662-128328097
Myl6	ENSMUSG00000090841.3	ENSMUSG00000090841.3:t:128326729-128326902	-0.2156;0.1976;0.0018;0.0000	6.204e-01;4.874e-01;5.342e-21;4.842e-21	9.911e-05;7.125e-04;9.260e-01;1.000e+00	0.6466;0.3326;0.0176;0.0003	0.4304;0.5394;0.0343;0.0032	t|1e1.1o1|1e2.1o1|1e3.1o2|1e3.2o2	4	4	0;0;0;0	chr10	-	128326902-128327928;128326902-128327589;128326902-128327159;128326902-128327155	128326729-128326902;128327155-128327216;128327589-128327633;128327734-128328005		http://genome.ucsc.edu/cgi-bin/hgTracks?db=GRCm39&position=chr10%3A128328005-128326729
Mprip	ENSMUSG00000005417.18	ENSMUSG00000005417.18:s:59662443-59662528	-0.2336;0.2336	7.313e-01;7.313e-01	3.572e-05;3.572e-05	0.5664;0.4336	0.3313;0.6687	s|1e1.1o1|1e2.1o1	2	3	0;0	chr11	+	59662528-59662978;59662528-59666342	59662443-59662528;59662978-59663043;59666342-59671686		http://genome.ucsc.edu/cgi-bin/hgTracks?db=GRCm39&position=chr11%3A59671686-59662443
Smtn	ENSMUSG00000020439.19	ENSMUSG00000020439.19:t:3474633-3474726	0.2060;-0.2060	5.734e-01;5.734e-01	2.401e-09;2.247e-09	0.6104;0.3896	0.8162;0.1838	t|1e1.1o1|1e2.1o1	2	3	0;0	chr11	-	3474726-3476165;3474726-3474883	3474633-3474726;3474883-3474945;3476165-3476240		http://genome.ucsc.edu/cgi-bin/hgTracks?db=GRCm39&position=chr11%3A3476240-3474633
Ktn1	ENSMUSG00000021843.18	ENSMUSG00000021843.18:t:47963683-47963766	-0.2732;0.2732	9.732e-01;9.732e-01	0.000e+00;2.901e-20	0.3698;0.6302	0.1015;0.8985	t|1e1.1o1|1e2.1o1	2	3	0;0	chr14	+	47962427-47963683;47963457-47963683	47962225-47962427;47963386-47963457;47963683-47963766		http://genome.ucsc.edu/cgi-bin/hgTracks?db=GRCm39&position=chr14%3A47963766-47962225
Fmo1	ENSMUSG00000040181.15	ENSMUSG00000040181.15:t:162686994-162687283	-0.2372;0.1750;0.0298	7.213e-01;3.427e-01;1.392e-07	7.225e-05;4.144e-03;5.080e-01	0.9067;0.0907;0.0036	0.6633;0.2726;0.0655	t|1e1.1o1|1e2.1o2|1e2.2o2	3	3	0;0;0	chr1	-	162687131-162693808;162687131-162687370;162687131-162687335	162686994-162687283;162687335-162687538;162693808-162694179		http://genome.ucsc.edu/cgi-bin/hgTracks?db=GRCm39&position=chr1%3A162694179-162686994
Camk2b	ENSMUSG00000057897.16	ENSMUSG00000057897.16:s:5929673-5929721	-0.1755;-0.0342;0.0000;0.2128	3.178e-01;1.515e-20;4.842e-21;6.107e-01	2.135e-03;4.765e-01;1.000e+00;5.388e-04	0.6185;0.0824;0.0003;0.2984	0.4409;0.0406;0.0041;0.5142	s|1e1.1o1|1e2.1o1|1e3.1o1|1e4.1o1	4	5	0;0;0;0	chr11	-	5928512-5929673;5927940-5929673;5926893-5929673;5922888-5929673	5922813-5922888;5926765-5926893;5927812-5927940;5928399-5928512;5929673-5929721		http://genome.ucsc.edu/cgi-bin/hgTracks?db=GRCm39&position=chr11%3A5929721-5922813
Camk2b	ENSMUSG00000057897.16	ENSMUSG00000057897.16:s:5938101-5938143	-0.2247;0.1711;0.0477	7.103e-01;2.640e-01;1.795e-20	2.471e-07;1.001e-03;4.688e-01	0.6517;0.3320;0.0208	0.4203;0.5035;0.0731	s|1e1.1o1|1e2.1o2|1e2.2o2	3	3	0;0;0	chr11	-	5937131-5938101;5932761-5938101;5932758-5938101	5932721-5932761;5937057-5937131;5938101-5938143		http://genome.ucsc.edu/cgi-bin/hgTracks?db=GRCm39&position=chr11%3A5938143-5932721
Camk2b	ENSMUSG00000057897.16	ENSMUSG00000057897.16:t:5922813-5922888	0.2008;-0.2008	5.172e-01;5.172e-01	1.428e-04;1.428e-04	0.2416;0.7584	0.4425;0.5575	t|1e1.1o1|1e2.1o1	2	3	0;0	chr11	-	5922888-5929673;5922888-5926765	5922813-5922888;5926765-5926893;5929673-5929721		http://genome.ucsc.edu/cgi-bin/hgTracks?db=GRCm39&position=chr11%3A5929721-5922813
Gopc	ENSMUSG00000019861.16	ENSMUSG00000019861.16:s:52234845-52235033	0.2523;-0.2526;0.0000	8.192e-01;8.206e-01;4.842e-21	8.843e-06;8.425e-06;1.000e+00	0.5660;0.4332;0.0008	0.8250;0.1740;0.0010	s|1e1.1o1|1e2.1o1|2e2.1o1	3	3	0;0;0	chr10	-	52233461-52234869;52230843-52234869;52230843-52234845	52230668-52230843;52233438-52233461;52234845-52235033		http://genome.ucsc.edu/cgi-bin/hgTracks?db=GRCm39&position=chr10%3A52235033-52230668
Dcn	ENSMUSG00000019929.17	ENSMUSG00000019929.17:t:97319199-97319613	-0.2278;0.2279;0.0000	7.454e-01;7.455e-01;4.842e-21	0.000e+00;3.752e-19;1.000e+00	0.7965;0.2034;0.0001	0.5712;0.4287;0.0001	t|1e1.1o1|1e2.1o1|1e3.1o1	3	4	0;0;0	chr10	+	97315651-97319201;97318409-97319201;97318878-97319201	97315471-97315651;97318229-97318409;97318715-97318878;97319199-97319613		http://genome.ucsc.edu/cgi-bin/hgTracks?db=GRCm39&position=chr10%3A97319613-97315471
Tacc2	ENSMUSG00000030852.19	ENSMUSG00000030852.19:t:130203567-130203667	-0.0062;-0.2237;0.2362	6.746e-21;7.240e-01;7.996e-01	7.998e-01;2.220e-16;3.039e-20	0.0470;0.5466;0.4087	0.0271;0.3304;0.6423	t|1e1.1o1|1e2.1o1|1e3.1o1	3	4	0;0;0	chr7	+	130179246-130203567;130191756-130203567;130198149-130203567	130179168-130179246;130191700-130191756;130198048-130198149;130203567-130203667		http://genome.ucsc.edu/cgi-bin/hgTracks?db=GRCm39&position=chr7%3A130203667-130179168
Arhgef11	ENSMUSG00000041977.19	ENSMUSG00000041977.19:s:87596086-87596157	0.2199;-0.2199	6.533e-01;6.533e-01	1.791e-04;1.791e-04	0.6028;0.3972	0.8267;0.1733	s|1e1.1o1|1e2.1o1	2	3	0;0	chr3	+	87596157-87602705;87596157-87604652	87596086-87596157;87602705-87602824;87604652-87604697		http://genome.ucsc.edu/cgi-bin/hgTracks?db=GRCm39&position=chr3%3A87604697-87596086
Morf4l2	ENSMUSG00000031422.17	ENSMUSG00000031422.17:s:135640554-135641236	-0.2345;0.2345	7.781e-01;7.781e-01	1.650e-08;1.647e-08	0.6608;0.3392	0.4298;0.5702	s|1e1.1o1|1e2.1o1	2	3	0;0	chrX	-	135636371-135640554;135635250-135640554	135633691-135635250;135636295-135636371;135640554-135641236		http://genome.ucsc.edu/cgi-bin/hgTracks?db=GRCm39&position=chrX%3A135641236-135633691
Morf4l2	ENSMUSG00000031422.17	ENSMUSG00000031422.17:t:135633691-135635250	0.0000;0.1989;-0.2005	4.842e-21;4.936e-01;5.076e-01	1.000e+00;2.362e-08;2.126e-08	0.0007;0.1977;0.8013	0.0016;0.3978;0.6009	t|1e1.1o1|1e2.1o1|1e3.1o1	3	4	0;0;0	chrX	-	135635250-135643573;135635250-135640554;135635250-135636295	135633691-135635250;135636295-135636371;135640554-135641236;135643573-135643667		http://genome.ucsc.edu/cgi-bin/hgTracks?db=GRCm39&position=chrX%3A135643667-135633691
Inppl1	ENSMUSG00000032737.14	ENSMUSG00000032737.14:s:101473100-101473766	-0.2679;0.2679	8.963e-01;8.963e-01	1.358e-06;1.359e-06	0.4565;0.5435	0.1845;0.8155	s|1e1.1o1|1e2.1o1	2	3	0;0	chr7	-	101472853-101473100;101472610-101473100	101471839-101472610;101472720-101472853;101473100-101473766		http://genome.ucsc.edu/cgi-bin/hgTracks?db=GRCm39&position=chr7%3A101473766-101471839
Cep350	ENSMUSG00000033671.19	ENSMUSG00000033671.19:s:155770340-155770500	0.2466;-0.2466	7.918e-01;7.918e-01	2.066e-05;2.066e-05	0.4437;0.5563	0.6926;0.3074	s|1e1.1o1|1e2.1o1	2	3	0;0	chr1	-	155763004-155770340;155761852-155770340	155761653-155761852;155762882-155763004;155770340-155770500		http://genome.ucsc.edu/cgi-bin/hgTracks?db=GRCm39&position=chr1%3A155770500-155761653
Cep350	ENSMUSG00000033671.19	ENSMUSG00000033671.19:t:155761653-155761852	-0.2930;0.2930	9.638e-01;9.638e-01	1.986e-10;1.962e-10	0.4912;0.5088	0.1926;0.8074	t|1e1.1o1|1e2.1o1	2	3	0;0	chr1	-	155761852-155770340;155761852-155762882	155761653-155761852;155762882-155763004;155770340-155770500		http://genome.ucsc.edu/cgi-bin/hgTracks?db=GRCm39&position=chr1%3A155770500-155761653
Etl4	ENSMUSG00000036617.18	ENSMUSG00000036617.18:t:20748270-20749627	-0.3386;0.3248;0.0000	9.979e-01;9.940e-01;4.842e-21	1.998e-15;2.523e-13;1.000e+00	0.5851;0.4144;0.0005	0.2556;0.7339;0.0136	t|1e1.1o1|1e2.1o1|1e3.1o1	3	4	0;0;0	chr2	+	20718259-20748270;20727534-20748270;20742366-20748270	20718122-20718259;20727189-20727534;20742125-20742366;20748270-20749627		http://genome.ucsc.edu/cgi-bin/hgTracks?db=GRCm39&position=chr2%3A20749627-20718122
Etl4	ENSMUSG00000036617.18	ENSMUSG00000036617.18:t:20765026-20765075	0.2033;-0.2033	5.538e-01;5.538e-01	7.496e-08;7.498e-08	0.7692;0.2308	0.9598;0.0402	t|1e1.1o1|1e2.1o1	2	3	0;0	chr2	+	20749102-20765026;20764462-20765026	20748270-20749627;20764358-20764462;20765026-20765075		http://genome.ucsc.edu/cgi-bin/hgTracks?db=GRCm39&position=chr2%3A20765075-20748270
Lims2	ENSMUSG00000024395.10	ENSMUSG00000024395.10:t:32074690-32074952	0.0000;-0.3651;0.3218;0.0000;0.0264;0.0000	4.842e-21;9.990e-01;9.827e-01;4.842e-21;1.215e-20;4.842e-21	9.999e-01;4.319e-14;7.430e-10;1.000e+00;5.530e-01;1.000e+00	0.0068;0.5957;0.3687;0.0003;0.0226;0.0003	0.0109;0.2367;0.6865;0.0004;0.0628;0.0004	t|1e2.1o1|2e1.1o1|2e2.1o1|2e3.1o1|2e4.1o1|2e5.1o1	6	6	0;0;0;0;0;0	chr18	+	32064603-32074690;32055529-32074793;32064603-32074793;32068610-32074793;32070578-32074793;32072564-32074793	32055343-32055529;32064378-32064603;32068567-32068610;32070329-32070578;32072471-32072564;32074690-32074952		http://genome.ucsc.edu/cgi-bin/hgTracks?db=GRCm39&position=chr18%3A32074952-32055343
Neb	ENSMUSG00000026950.19	ENSMUSG00000026950.19:s:52077423-52077527	0.3252;-0.3252	1.000e+00;1.000e+00	2.701e-20;0.000e+00	0.4887;0.5113	0.8016;0.1984	s|1e1.1o1|1e2.1o1	2	3	0;0	chr2	-	52076128-52077423;52075387-52077423	52075283-52075387;52076024-52076128;52077423-52077527		http://genome.ucsc.edu/cgi-bin/hgTracks?db=GRCm39&position=chr2%3A52077527-52075283
Neb	ENSMUSG00000026950.19	ENSMUSG00000026950.19:t:52073744-52073848	0.3172;-0.3172	1.000e+00;1.000e+00	2.751e-20;0.000e+00	0.4600;0.5400	0.7706;0.2294	t|1e1.1o1|1e2.1o1	2	3	0;0	chr2	-	52073848-52076024;52073848-52075283	52073744-52073848;52075283-52075387;52076024-52076128		http://genome.ucsc.edu/cgi-bin/hgTracks?db=GRCm39&position=chr2%3A52076128-52073744
Dnajc13	ENSMUSG00000032560.15	ENSMUSG00000032560.15:s:104089960-104090103	0.2520;-0.2520	7.900e-01;7.900e-01	1.318e-04;1.318e-04	0.5046;0.4954	0.7575;0.2425	s|1e1.1o1|1e2.1o1	2	3	0;0	chr9	-	104087082-104089960;104086586-104089960	104086504-104086586;104087068-104087082;104089960-104090103		http://genome.ucsc.edu/cgi-bin/hgTracks?db=GRCm39&position=chr9%3A104090103-104086504
Dnajc13	ENSMUSG00000032560.15	ENSMUSG00000032560.15:t:104086504-104086586	-0.2122;0.2122	6.018e-01;6.018e-01	2.437e-03;2.437e-03	0.4576;0.5424	0.2398;0.7602	t|1e1.1o1|1e2.1o1	2	3	0;0	chr9	-	104086586-104089960;104086586-104087068	104086504-104086586;104087068-104087082;104089960-104090103		http://genome.ucsc.edu/cgi-bin/hgTracks?db=GRCm39&position=chr9%3A104090103-104086504
Dysf	ENSMUSG00000033788.16	ENSMUSG00000033788.16:s:84040303-84040417	-0.2361;0.2361	7.441e-01;7.441e-01	2.299e-05;2.299e-05	0.4808;0.5192	0.2416;0.7584	s|1e1.1o1|1e2.1o1	2	3	0;0	chr6	+	84040417-84041453;84040417-84041858	84040303-84040417;84041453-84041545;84041858-84042069		http://genome.ucsc.edu/cgi-bin/hgTracks?db=GRCm39&position=chr6%3A84042069-84040303
Dysf	ENSMUSG00000033788.16	ENSMUSG00000033788.16:t:84041858-84042069	0.2723;-0.2723	8.669e-01;8.669e-01	1.813e-05;1.813e-05	0.4597;0.5403	0.7375;0.2625	t|1e1.1o1|1e2.1o1	2	3	0;0	chr6	+	84040417-84041858;84041545-84041858	84040303-84040417;84041453-84041545;84041858-84042069		http://genome.ucsc.edu/cgi-bin/hgTracks?db=GRCm39&position=chr6%3A84042069-84040303
Crem	ENSMUSG00000063889.17	ENSMUSG00000063889.17:t:3273422-3273578	0.0000;0.1038;-0.0000;-0.0095;-0.2404;0.1550	4.842e-21;2.409e-02;4.842e-21;7.874e-21;7.407e-01;2.675e-01	1.000e+00;6.535e-02;1.000e+00;7.276e-01;1.370e-04;1.774e-02	0.0028;0.0614;0.0070;0.0472;0.4149;0.4581	0.0009;0.1825;0.0009;0.0173;0.1655;0.6338	t|1e1.1o1|1e2.1o1|1e3.1o1|1e4.1o1|1e5.1o1|1e6.1o1	6	7	0;0;0;0;0;0	chr18	-	3273578-3337380;3273578-3295040;3273578-3287904;3273578-3281688;3273578-3280949;3273578-3276694	3273422-3273578;3276694-3276775;3280949-3281132;3281688-3281769;3287632-3288092;3294184-3295182;3337380-3337748		http://genome.ucsc.edu/cgi-bin/hgTracks?db=GRCm39&position=chr18%3A3337748-3273422
Apod	ENSMUSG00000022548.15	ENSMUSG00000022548.15:s:31133370-31133626	0.2025;-0.2025	5.268e-01;5.268e-01	2.366e-03;2.366e-03	0.5419;0.4581	0.7666;0.2334	s|1e1.1o1|1e2.1o1	2	3	0;0	chr16	-	31133286-31133370;31129982-31133370	31129832-31130166;31133217-31133286;31133370-31133626		http://genome.ucsc.edu/cgi-bin/hgTracks?db=GRCm39&position=chr16%3A31133626-31129832
Ptk2	ENSMUSG00000022607.19	ENSMUSG00000022607.19:s:73148706-73148762	0.2159;-0.2159	6.238e-01;6.238e-01	2.443e-04;2.443e-04	0.2355;0.7645	0.4585;0.5415	s|1e1.1o1|1e2.1o1	2	3	0;0	chr15	-	73147490-73148706;73146433-73148706	73146336-73146433;73147470-73147490;73148706-73148762		http://genome.ucsc.edu/cgi-bin/hgTracks?db=GRCm39&position=chr15%3A73148762-73146336
Macf1	ENSMUSG00000028649.23	ENSMUSG00000028649.23:s:123259066-123259140	0.3172;-0.3172	9.872e-01;9.872e-01	1.089e-09;1.089e-09	0.4046;0.5954	0.7197;0.2803	s|1e1.1o1|1e2.1o1	2	3	0;0	chr4	-	123257867-123259066;123254820-123259066	123254703-123254820;123257850-123257867;123259066-123259140		http://genome.ucsc.edu/cgi-bin/hgTracks?db=GRCm39&position=chr4%3A123259140-123254703
Macf1	ENSMUSG00000028649.23	ENSMUSG00000028649.23:s:123281021-123281224	-0.2683;0.2683	8.963e-01;8.963e-01	6.515e-06;6.515e-06	0.7089;0.2911	0.4348;0.5652	s|1e1.1o1|1e2.1o1	2	3	0;0	chr4	-	123280350-123281021;123279479-123281021	123279248-123279479;123280342-123280350;123281021-123281224		http://genome.ucsc.edu/cgi-bin/hgTracks?db=GRCm39&position=chr4%3A123281224-123279248
Macf1	ENSMUSG00000028649.23	ENSMUSG00000028649.23:s:123438535-123438624	0.2527;-0.2527	8.877e-01;8.877e-01	4.598e-09;4.584e-09	0.6214;0.3786	0.8753;0.1247	s|1e1.1o1|1e2.1o1	2	3	0;0	chr4	-	123436380-123438535;123433666-123438535	123432673-123433666;123436285-123436380;123438535-123438624		http://genome.ucsc.edu/cgi-bin/hgTracks?db=GRCm39&position=chr4%3A123438624-123432673
Macf1	ENSMUSG00000028649.23	ENSMUSG00000028649.23:t:123254703-123254820	-0.2479;0.2479	8.025e-01;8.025e-01	3.771e-06;3.771e-06	0.5125;0.4875	0.2652;0.7348	t|1e1.1o1|1e2.1o1	2	3	0;0	chr4	-	123254820-123259066;123254820-123257850	123254703-123254820;123257850-123257867;123259066-123259140		http://genome.ucsc.edu/cgi-bin/hgTracks?db=GRCm39&position=chr4%3A123259140-123254703
Macf1	ENSMUSG00000028649.23	ENSMUSG00000028649.23:t:123279248-123279479	0.2244;-0.2244	6.997e-01;6.997e-01	8.011e-06;8.011e-06	0.2294;0.7706	0.4564;0.5436	t|1e1.1o1|1e2.1o1	2	3	0;0	chr4	-	123279479-123281021;123279479-123280342	123279248-123279479;123280342-123280350;123281021-123281224		http://genome.ucsc.edu/cgi-bin/hgTracks?db=GRCm39&position=chr4%3A123281224-123279248
Macf1	ENSMUSG00000028649.23	ENSMUSG00000028649.23:t:123432673-123433666	-0.3508;0.3508	9.985e-01;9.985e-01	4.201e-13;4.704e-13	0.5632;0.4368	0.2161;0.7839	t|1e1.1o1|1e2.1o1	2	3	0;0	chr4	-	123433666-123438535;123433666-123436285	123432673-123433666;123436285-123436380;123438535-123438624		http://genome.ucsc.edu/cgi-bin/hgTracks?db=GRCm39&position=chr4%3A123438624-123432673
Macf1	ENSMUSG00000028649.23	ENSMUSG00000028649.23:t:123448097-123448158	-0.0006;-0.2077;0.0808;0.1445;-0.0003	5.026e-21;5.782e-01;2.510e-06;1.378e-01;4.929e-21	9.735e-01;7.489e-04;1.357e-01;1.262e-02;9.872e-01	0.0301;0.8104;0.0192;0.1217;0.0197	0.0072;0.5938;0.1097;0.2693;0.0162	t|1e1.1o1|1e2.1o1|1e3.1o1|1e4.1o1|1e5.1o1	5	6	0;0;0;0;0	chr4	-	123448158-123577763;123448158-123558259;123448158-123507380;123448158-123466410;123448158-123458256	123448097-123448158;123458256-123458487;123466410-123466853;123507380-123507536;123558259-123558545;123577571-123578153		http://genome.ucsc.edu/cgi-bin/hgTracks?db=GRCm39&position=chr4%3A123578153-123448097
Tenm3	ENSMUSG00000031561.17	ENSMUSG00000031561.17:s:48788228-48788809	0.3371;-0.3371	9.926e-01;9.926e-01	1.368e-09;1.369e-09	0.1192;0.8808	0.4582;0.5418	s|1e1.1o1|1e2.1o1	2	3	0;0	chr8	-	48766299-48788624;48763804-48788624	48763658-48763804;48766273-48766299;48788228-48788809		http://genome.ucsc.edu/cgi-bin/hgTracks?db=GRCm39&position=chr8%3A48788809-48763658
Tenm3	ENSMUSG00000031561.17	ENSMUSG00000031561.17:t:48763658-48763804	-0.3557;0.3557	9.942e-01;9.942e-01	1.661e-09;1.674e-09	0.8504;0.1496	0.4912;0.5088	t|1e1.1o1|1e2.1o1	2	3	0;0	chr8	-	48763804-48788624;48763804-48766273	48763658-48763804;48766273-48766299;48788228-48788809		http://genome.ucsc.edu/cgi-bin/hgTracks?db=GRCm39&position=chr8%3A48788809-48763658
Rnps1	ENSMUSG00000034681.18	ENSMUSG00000034681.18:s:24633539-24633708	0.0698;0.1183;-0.2022	8.128e-04;2.880e-02;5.285e-01	1.869e-01;3.730e-02;3.387e-06	0.2524;0.3380;0.4122	0.3339;0.4601;0.2077	s|1e1.1o1|1e2.1o1|1e3.1o1	3	4	0;0;0	chr17	+	24633708-24634015;24633708-24637012;24633708-24637431	24633539-24633708;24634015-24635812;24637012-24637202;24637431-24637586		http://genome.ucsc.edu/cgi-bin/hgTracks?db=GRCm39&position=chr17%3A24637586-24633539
Smg7	ENSMUSG00000042772.16	ENSMUSG00000042772.16:t:152746511-152746542	-0.2008;0.2005;0.0000	4.964e-01;4.945e-01;4.842e-21	3.182e-04;3.263e-04;1.000e+00	0.8366;0.1628;0.0007	0.6392;0.3599;0.0010	t|1e1.1o1|1e2.1o1|1e3.1o1	3	4	0;0;0	chr1	-	152746542-152778260;152746542-152753792;152746542-152746831	152746511-152746542;152746831-152746909;152753792-152753919;152778260-152778397		http://genome.ucsc.edu/cgi-bin/hgTracks?db=GRCm39&position=chr1%3A152778397-152746511
Phldb1	ENSMUSG00000048537.17	ENSMUSG00000048537.17:s:44610644-44610746	0.2789;-0.2789	9.181e-01;9.181e-01	5.271e-05;5.271e-05	0.3917;0.6083	0.6765;0.3235	s|1e1.1o1|1e2.1o1	2	3	0;0	chr9	-	44610168-44610644;44609517-44610644	44609223-44609517;44610124-44610168;44610644-44610746		http://genome.ucsc.edu/cgi-bin/hgTracks?db=GRCm39&position=chr9%3A44610746-44609223
Phldb1	ENSMUSG00000048537.17	ENSMUSG00000048537.17:t:44609223-44609517	-0.2711;0.2711	8.683e-01;8.683e-01	7.264e-06;7.264e-06	0.6722;0.3278	0.4022;0.5978	t|1e1.1o1|1e2.1o1	2	3	0;0	chr9	-	44609517-44610644;44609517-44610124	44609223-44609517;44610124-44610168;44610644-44610746		http://genome.ucsc.edu/cgi-bin/hgTracks?db=GRCm39&position=chr9%3A44610746-44609223
Phldb1	ENSMUSG00000048537.17	ENSMUSG00000048537.17:t:44629571-44629696	-0.2719;0.1742;0.0837	8.407e-01;3.718e-01;2.185e-03	5.260e-05;9.621e-03;1.150e-01	0.6306;0.3192;0.0442	0.3489;0.5116;0.1377	t|1e1.1o1|1e2.1o2|1e2.2o2	3	3	0;0;0	chr9	-	44629696-44637307;44629696-44632567;44629696-44632551	44629571-44629696;44632551-44632721;44637307-44637477		http://genome.ucsc.edu/cgi-bin/hgTracks?db=GRCm39&position=chr9%3A44637477-44629571
Plin3	ENSMUSG00000024197.11	ENSMUSG00000024197.11:t:56594794-56594876	0.2776;-0.2776	8.673e-01;8.673e-01	1.220e-05;1.220e-05	0.1328;0.8672	0.4061;0.5939	t|1e1.1o1|1e2.1o1	2	3	0;0	chr17	-	56594876-56599733;56594876-56597454	56594794-56594876;56597454-56597511;56599733-56599873		http://genome.ucsc.edu/cgi-bin/hgTracks?db=GRCm39&position=chr17%3A56599873-56594794
R3hdm1	ENSMUSG00000056211.14	ENSMUSG00000056211.14:s:128080926-128081136	0.2036;-0.0000;-0.1980	5.285e-01;4.842e-21;4.766e-01	5.306e-05;1.000e+00;7.024e-05	0.5831;0.0080;0.4080	0.7913;0.0023;0.2049	s|1e1.1o1|1e2.1o1|1e3.1o1	3	4	0;0;0	chr1	+	128081136-128089939;128081136-128090506;128081136-128095630	128080926-128081136;128089939-128089980;128090506-128090595;128095630-128095744		http://genome.ucsc.edu/cgi-bin/hgTracks?db=GRCm39&position=chr1%3A128095744-128080926
Fry	ENSMUSG00000056602.14	ENSMUSG00000056602.14:s:150381176-150381380	0.2184;-0.2184	6.370e-01;6.370e-01	2.723e-05;2.723e-05	0.5036;0.4964	0.7185;0.2815	s|1e1.1o1|1e2.1o1	2	3	0;0	chr5	+	150381380-150384854;150381380-150389709	150381176-150381380;150384111-150387794;150389709-150389906		http://genome.ucsc.edu/cgi-bin/hgTracks?db=GRCm39&position=chr5%3A150389906-150381176
Fry	ENSMUSG00000056602.14	ENSMUSG00000056602.14:t:150233735-150233934	-0.0000;-0.1823;-0.0001;0.2130	4.842e-21;3.506e-01;4.863e-21;6.035e-01	1.000e+00;4.794e-04;9.969e-01;8.075e-06	0.0174;0.3557;0.0242;0.6044	0.0088;0.1702;0.0048;0.8169	t|1e1.1o1|1e2.1o1|1e3.1o1|1e4.1o1	4	5	0;0;0;0	chr5	+	150042276-150233735;150120200-150233735;150183803-150233735;150219149-150233735	150042110-150042276;150119931-150120200;150181007-150183803;150218853-150219149;150233735-150233934		http://genome.ucsc.edu/cgi-bin/hgTracks?db=GRCm39&position=chr5%3A150233934-150042110
Zfp385a	ENSMUSG00000000552.11	ENSMUSG00000000552.11:t:103228717-103228827	0.2107;-0.2107	5.928e-01;5.928e-01	1.608e-04;1.608e-04	0.6778;0.3222	0.8903;0.1097	t|1e1.1o1|1e2.1o1	2	3	0;0	chr15	-	103228827-103241492;103228827-103231818	103228717-103228827;103231818-103231937;103241492-103241628		http://genome.ucsc.edu/cgi-bin/hgTracks?db=GRCm39&position=chr15%3A103241628-103228717
Acss2	ENSMUSG00000027605.19	ENSMUSG00000027605.19:t:155397774-155397911	0.0000;0.2126;-0.2129	4.842e-21;5.840e-01;5.866e-01	1.000e+00;3.171e-05;3.135e-05	0.0005;0.0974;0.9021	0.0009;0.3076;0.6915	t|1e1.1o1|1e2.1o1|1e3.1o1	3	4	0;0;0	chr2	+	155364096-155397774;155392389-155397774;155393148-155397774	155363901-155367211;155392275-155392389;155393110-155394307;155397774-155397911		http://genome.ucsc.edu/cgi-bin/hgTracks?db=GRCm39&position=chr2%3A155397911-155363901
Naca	ENSMUSG00000061315.15	ENSMUSG00000061315.15:s:127872358-127872429	0.2451;-0.2451	9.062e-01;9.062e-01	3.029e-20;0.000e+00	0.3799;0.6201	0.6210;0.3790	s|1e1.1o1|1e2.1o1	2	3	0;0	chr10	+	127872429-127875040;127872429-127882037	127872358-127872429;127875040-127880955;127882037-127882122		http://genome.ucsc.edu/cgi-bin/hgTracks?db=GRCm39&position=chr10%3A127882122-127872358
Clasp1	ENSMUSG00000064302.15	ENSMUSG00000064302.15:s:118466996-118467099	0.2379;-0.2379	7.969e-01;7.969e-01	4.372e-07;4.372e-07	0.3929;0.6071	0.6331;0.3669	s|1e1.1o1|1e2.1o2	2	3	0;0	chr1	+	118467099-118469405;118467099-118470832	118466996-118467099;118469405-118469428;118470832-118471076		http://genome.ucsc.edu/cgi-bin/hgTracks?db=GRCm39&position=chr1%3A118471076-118466996
Clasp1	ENSMUSG00000064302.15	ENSMUSG00000064302.15:t:118470832-118471076	-0.2672;0.2651;0.0000	9.034e-01;8.959e-01;4.842e-21	4.208e-07;2.736e-07;1.000e+00	0.6749;0.3149;0.0099	0.4131;0.5758;0.0112	t|1e1.1o1|1e2.1o1|2e2.1o1	3	3	0;0;0	chr1	+	118467099-118470832;118469428-118470832;118469428-118470835	118466996-118467099;118469405-118469428;118470832-118471076		http://genome.ucsc.edu/cgi-bin/hgTracks?db=GRCm39&position=chr1%3A118471076-118466996
Ctsa	ENSMUSG00000017760.17	ENSMUSG00000017760.17:t:164675950-164675982	-0.3101;0.3101	9.777e-01;9.777e-01	4.736e-08;4.738e-08	0.4330;0.5670	0.1235;0.8765	t|1e1.1o1|1e2.1o1	2	3	0;0	chr2	+	164675116-164675950;164675770-164675950	164674793-164675116;164675727-164675770;164675950-164675982		http://genome.ucsc.edu/cgi-bin/hgTracks?db=GRCm39&position=chr2%3A164675982-164674793
Lims1	ENSMUSG00000019920.19	ENSMUSG00000019920.19:t:58234843-58235002	-0.2245;0.0000;0.2244	6.852e-01;4.842e-21;6.858e-01	4.287e-05;1.000e+00;1.834e-05	0.5005;0.0051;0.4933	0.2728;0.0055;0.7201	t|1e1.1o1|1e2.1o1|1e3.1o1	3	4	0;0;0	chr10	+	58159509-58234843;58207521-58234843;58230422-58234843	58159288-58159509;58207276-58207521;58230195-58230422;58234843-58235002		http://genome.ucsc.edu/cgi-bin/hgTracks?db=GRCm39&position=chr10%3A58235002-58159288
Dnm1l	ENSMUSG00000022789.16	ENSMUSG00000022789.16:s:16163844-16164009	0.2112;-0.2020;0.0000;-0.0026	5.733e-01;5.227e-01;4.849e-21;7.845e-21	5.886e-04;1.748e-03;9.989e-01;7.193e-01	0.1620;0.7712;0.0171;0.0456	0.3784;0.5592;0.0126;0.0383	s|1e1.1o1|1e2.1o1|1e3.1o1|2e2.1o1	4	4	0;0;0;0	chr16	-	16160599-16163862;16159332-16163862;16158931-16163862;16159332-16163844	16158860-16158931;16159286-16159332;16160561-16160599;16163844-16164009		http://genome.ucsc.edu/cgi-bin/hgTracks?db=GRCm39&position=chr16%3A16164009-16158860
Dnm1l	ENSMUSG00000022789.16	ENSMUSG00000022789.16:t:16159286-16159332	-0.2112;-0.0032;0.2162	5.787e-01;7.995e-21;5.969e-01	1.166e-03;7.120e-01;4.807e-04	0.7745;0.0473;0.1831	0.5507;0.0399;0.4027	t|1e1.1o2|1e1.2o2|1e2.1o1	3	3	0;0;0	chr16	-	16159332-16163862;16159332-16163844;16159332-16160561	16159286-16159332;16160561-16160599;16163844-16164009		http://genome.ucsc.edu/cgi-bin/hgTracks?db=GRCm39&position=chr16%3A16164009-16159286
Postn	ENSMUSG00000027750.17	ENSMUSG00000027750.17:s:54284981-54285027	-0.3755;0.3755	1.000e+00;1.000e+00	0.000e+00;2.522e-20	0.4952;0.5048	0.1264;0.8736	s|1e1.1o1|1e2.1o1	2	3	0;0	chr3	+	54285027-54287833;54285027-54290809	54284981-54285027;54285905-54287913;54290528-54290898		http://genome.ucsc.edu/cgi-bin/hgTracks?db=GRCm39&position=chr3%3A54290898-54284981
Postn	ENSMUSG00000027750.17	ENSMUSG00000027750.17:s:54292629-54292706	-0.2714;0.2714	9.490e-01;9.490e-01	8.549e-15;8.346e-15	0.6210;0.3790	0.3530;0.6470	s|1e1.1o1|1e2.1o1	2	3	0;0	chr3	+	54292706-54293092;54292706-54296760	54292629-54292706;54293092-54293175;54296310-54296801		http://genome.ucsc.edu/cgi-bin/hgTracks?db=GRCm39&position=chr3%3A54296801-54292629
Postn	ENSMUSG00000027750.17	ENSMUSG00000027750.17:t:54290528-54290898	0.4166;-0.4166	1.000e+00;1.000e+00	2.364e-20;0.000e+00	0.3597;0.6403	0.7661;0.2339	t|1e1.1o1|1e2.1o1	2	3	0;0	chr3	+	54285027-54290809;54287913-54290809	54284981-54285027;54285905-54287913;54290528-54290898		http://genome.ucsc.edu/cgi-bin/hgTracks?db=GRCm39&position=chr3%3A54290898-54284981
Postn	ENSMUSG00000027750.17	ENSMUSG00000027750.17:t:54296310-54296801	0.0001;0.2816;-0.2935	4.858e-21;9.816e-01;9.914e-01	9.973e-01;2.275e-17;0.000e+00	0.0182;0.4209;0.5619	0.0283;0.6988;0.2724	t|1e1.1o1|1e2.1o1|1e3.1o1	3	4	0;0;0	chr3	+	54291994-54296760;54292706-54296760;54293175-54296760	54291905-54292133;54292629-54292706;54293092-54293175;54296310-54296801		http://genome.ucsc.edu/cgi-bin/hgTracks?db=GRCm39&position=chr3%3A54296801-54291905
Atp2b1	ENSMUSG00000019943.11	ENSMUSG00000019943.11:s:98854577-98854759	0.2024;-0.2025;0.0000	5.421e-01;5.429e-01;4.842e-21	2.424e-03;2.394e-03;1.000e+00	0.5071;0.4921;0.0008	0.7160;0.2831;0.0009	s|1e1.1o1|1e2.1o1|1e3.1o1	3	4	0;0;0	chr10	+	98854759-98855140;98854759-98858670;98854759-98859094	98854577-98854759;98854899-98855293;98858670-98858795;98859094-98862005		http://genome.ucsc.edu/cgi-bin/hgTracks?db=GRCm39&position=chr10%3A98862005-98854577
App	ENSMUSG00000022892.12	ENSMUSG00000022892.12:s:84840464-84840631	0.2173;-0.2173	6.774e-01;6.774e-01	7.840e-13;0.000e+00	0.5092;0.4908	0.7274;0.2726	s|1e1.1o1|1e2.1o1	2	3	0;0	chr16	-	84837195-84840464;84827253-84840464	84827120-84827253;84837139-84837195;84840464-84840631		http://genome.ucsc.edu/cgi-bin/hgTracks?db=GRCm39&position=chr16%3A84840631-84827120
App	ENSMUSG00000022892.12	ENSMUSG00000022892.12:t:84827120-84827253	0.0047;-0.2096;0.1872	5.692e-21;6.270e-01;3.815e-01	8.378e-01;0.000e+00;2.741e-09	0.0706;0.4331;0.4964	0.0914;0.2258;0.6822	t|1e1.1o1|1e2.1o1|1e3.1o1	3	4	0;0;0	chr16	-	84827253-84853212;84827253-84840464;84827253-84837139	84827120-84827253;84837139-84837195;84840464-84840631;84853212-84853414		http://genome.ucsc.edu/cgi-bin/hgTracks?db=GRCm39&position=chr16%3A84853414-84827120
Itga7	ENSMUSG00000025348.11	ENSMUSG00000025348.11:t:128778677-128778884	-0.2088;0.2088	5.753e-01;5.753e-01	5.412e-04;5.412e-04	0.3371;0.6629	0.1246;0.8754	t|1e1.1o1|1e2.1o1	2	3	0;0	chr10	+	128777445-128778677;128777810-128778677	128777314-128777445;128777691-128777810;128778677-128778884		http://genome.ucsc.edu/cgi-bin/hgTracks?db=GRCm39&position=chr10%3A128778884-128777314
Atosa	ENSMUSG00000034858.18	ENSMUSG00000034858.18:t:74911547-74911731	-0.2792;0.2792	9.209e-01;9.209e-01	3.705e-07;3.704e-07	0.7826;0.2174	0.4996;0.5004	t|1e1.1o1|1e2.1o1	2	3	0;0	chr9	+	74861112-74911547;74883558-74911547	74860996-74861112;74883393-74883558;74911547-74911731		http://genome.ucsc.edu/cgi-bin/hgTracks?db=GRCm39&position=chr9%3A74911731-74860996
Sec31a	ENSMUSG00000035325.17	ENSMUSG00000035325.17:t:100516153-100516211	-0.3030;0.1915;0.0990	9.571e-01;4.302e-01;2.109e-02	3.938e-08;1.039e-03;7.454e-02	0.6393;0.2506;0.1111	0.3266;0.4492;0.2219	t|1e1.1o1|1e2.1o2|1e3.1o1	3	4	0;0;0	chr5	-	100516211-100523067;100516211-100521284;100516211-100517455	100516153-100516211;100517455-100517493;100521239-100521574;100523067-100523190		http://genome.ucsc.edu/cgi-bin/hgTracks?db=GRCm39&position=chr5%3A100523190-100516153
Atxn2	ENSMUSG00000042605.17	ENSMUSG00000042605.17:t:121948727-121949014	-0.2120;0.2120	5.921e-01;5.921e-01	2.910e-04;2.910e-04	0.7450;0.2550	0.5269;0.4731	t|1e1.1o1|1e2.1o1	2	3	0;0	chr5	+	121941143-121948914;121944338-121948914	121941011-121941498;121943642-121947119;121948727-121949014		http://genome.ucsc.edu/cgi-bin/hgTracks?db=GRCm39&position=chr5%3A121949014-121941011
Pstk	ENSMUSG00000063179.14	ENSMUSG00000063179.14:t:130975794-130975992	-0.3849;0.3849	9.992e-01;9.992e-01	1.328e-12;1.331e-12	0.7243;0.2757	0.3475;0.6525	t|1e1.1o1|1e2.1o1	2	3	0;0	chr7	+	130973118-130975794;130975559-130975794	130972870-130973559;130974764-130975584;130975794-130975992		http://genome.ucsc.edu/cgi-bin/hgTracks?db=GRCm39&position=chr7%3A130975992-130972870
Ank3	ENSMUSG00000069601.15	ENSMUSG00000069601.15:t:69763525-69763648	-0.2779;-0.0183;0.0000;0.3109	9.634e-01;1.023e-20;4.842e-21;9.948e-01	3.044e-12;5.909e-01;1.000e+00;3.667e-20	0.5436;0.0833;0.0003;0.3729	0.2700;0.0514;0.0002;0.6806	t|1e1.1o1|1e2.1o1|1e3.1o1|1e4.1o1	4	5	0;0;0;0	chr10	+	69740100-69763525;69740340-69763525;69756321-69763525;69762021-69763525	69740028-69740100;69740278-69740340;69756268-69756321;69761325-69762168;69763525-69763648		http://genome.ucsc.edu/cgi-bin/hgTracks?db=GRCm39&position=chr10%3A69763648-69740028
Tjap1	ENSMUSG00000012296.17	ENSMUSG00000012296.17:t:46571021-46571128	-0.2252;0.2252	7.234e-01;7.234e-01	7.000e-07;7.000e-07	0.8630;0.1370	0.6434;0.3566	t|1e1.1o1|1e2.1o1	2	3	0;0	chr17	-	46571128-46572062;46571128-46571806	46571021-46571128;46571239-46571835;46572062-46572128		http://genome.ucsc.edu/cgi-bin/hgTracks?db=GRCm39&position=chr17%3A46572128-46571021
Rtn4	ENSMUSG00000020458.17	ENSMUSG00000020458.17:s:29643147-29643693	0.3532;-0.3532	9.992e-01;9.992e-01	3.608e-20;0.000e+00	0.4721;0.5279	0.8191;0.1809	s|1e1.1o1|1e2.1o1	2	3	0;0	chr11	+	29643693-29655535;29643693-29683633	29643147-29643693;29655535-29655591;29683633-29683840		http://genome.ucsc.edu/cgi-bin/hgTracks?db=GRCm39&position=chr11%3A29683840-29643147
Meg3	ENSMUSG00000021268.19	ENSMUSG00000021268.19:t:109515914-109516014	0.0000;0.3571;-0.3564;0.0000	4.842e-21;9.998e-01;9.997e-01;4.842e-21	1.000e+00;1.184e-18;0.000e+00;1.000e+00	0.0045;0.1659;0.8195;0.0071	0.0005;0.5164;0.4699;0.0112	t|1e1.1o1|1e2.1o1|1e3.1o1|2e2.1o1	4	4	0;0;0;0	chr12	+	109510625-109515914;109512425-109515914;109515806-109515914;109512425-109515954	109510525-109510625;109511281-109512425;109515592-109515806;109515914-109516014		http://genome.ucsc.edu/cgi-bin/hgTracks?db=GRCm39&position=chr12%3A109516014-109510525
Osgepl1	ENSMUSG00000026096.15	ENSMUSG00000026096.15:t:53362326-53363223	-0.2383;0.2383	7.385e-01;7.385e-01	4.009e-04;4.009e-04	0.4300;0.5700	0.1939;0.8061	t|1e1.1o1|1e2.1o1	2	3	0;0	chr1	+	53360369-53362326;53360726-53362326	53360239-53360369;53360655-53360726;53362326-53363223		http://genome.ucsc.edu/cgi-bin/hgTracks?db=GRCm39&position=chr1%3A53363223-53360239
S100a16	ENSMUSG00000074457.11	ENSMUSG00000074457.11:t:90449301-90449479	0.2256;0.0000;0.0000;-0.0008;-0.0020;-0.1467;0.0000	7.320e-01;4.842e-21;4.842e-21;5.084e-21;5.467e-21;4.564e-02;4.842e-21	2.811e-09;1.000e+00;1.000e+00;9.657e-01;9.179e-01;3.710e-03;1.000e+00	0.6957;0.0014;0.0036;0.0362;0.0417;0.2229;0.0027	0.9183;0.0017;0.0016;0.0016;0.0044;0.0733;0.0016	t|1e1.1o1|1e2.1o1|1e3.1o1|1e4.1o3|1e4.2o3|1e4.3o3|2e1.1o1	7	5	0;0;0;0;0;0;0	chr3	+	90444724-90449301;90446328-90449301;90446772-90449301;90448497-90449301;90448501-90449301;90448624-90449301;90444724-90449307	90444561-90444724;90446192-90446328;90446595-90446772;90448453-90448624;90449301-90449479		http://genome.ucsc.edu/cgi-bin/hgTracks?db=GRCm39&position=chr3%3A90449479-90444561
Utrn	ENSMUSG00000019820.12	ENSMUSG00000019820.12:t:12640983-12641076	0.3096;0.0218;-0.3737	9.427e-01;5.966e-09;9.942e-01	2.829e-06;5.766e-01;5.211e-09	0.3642;0.0009;0.6349	0.6802;0.0581;0.2570	t|1e1.1o1|1e2.1o1|1e3.1o1	3	4	0;0;0	chr10	-	12641076-12737312;12641076-12702513;12641076-12689190	12640983-12641076;12688155-12689359;12702513-12702682;12737107-12737479		http://genome.ucsc.edu/cgi-bin/hgTracks?db=GRCm39&position=chr10%3A12737479-12640983
Zmynd11	ENSMUSG00000021156.18	ENSMUSG00000021156.18:s:9770809-9770968	0.0557;-0.2355;0.1657;0.0000	7.630e-06;7.463e-01;2.689e-01;4.842e-21	2.976e-01;3.606e-05;7.515e-03;1.000e+00	0.0608;0.4274;0.5137;0.0005	0.1261;0.1872;0.6869;0.0004	s|1e1.1o1|1e2.1o1|1e3.1o1|1e4.1o1	4	5	0;0;0;0	chr13	-	9763063-9770809;9760343-9770809;9748741-9770809;9741146-9770809	9740939-9741309;9748664-9748741;9760182-9760343;9762268-9766093;9770809-9770968		http://genome.ucsc.edu/cgi-bin/hgTracks?db=GRCm39&position=chr13%3A9770968-9740939
Smap1	ENSMUSG00000026155.14	ENSMUSG00000026155.14:s:23915455-23915530	0.2071;-0.2013;-0.0000	5.509e-01;5.063e-01;4.842e-21	1.996e-04;2.946e-04;1.000e+00	0.3530;0.6429;0.0059	0.5644;0.4348;0.0008	s|1e1.1o1|1e2.1o2|1e2.2o2	3	3	0;0;0	chr1	-	23910599-23915455;23905378-23915455;23905374-23915455	23905298-23905378;23910519-23910599;23915455-23915530		http://genome.ucsc.edu/cgi-bin/hgTracks?db=GRCm39&position=chr1%3A23915530-23905298
Smap1	ENSMUSG00000026155.14	ENSMUSG00000026155.14:t:23905298-23905378	-0.2725;0.2778;0.0000;-0.0000	9.325e-01;9.431e-01;4.842e-21;4.842e-21	2.450e-09;9.672e-10;1.000e+00;1.000e+00	0.5437;0.4505;0.0004;0.0049	0.2718;0.7274;0.0004;0.0004	t|1e1.1o1|1e2.1o1|1e3.1o1|2e1.1o1	4	4	0;0;0;0	chr1	-	23905378-23915455;23905378-23910519;23905378-23909005;23905374-23915455	23905298-23905378;23909005-23909055;23910519-23910599;23915455-23915530		http://genome.ucsc.edu/cgi-bin/hgTracks?db=GRCm39&position=chr1%3A23915530-23905298
Slc12a6	ENSMUSG00000027130.16	ENSMUSG00000027130.16:t:112163728-112163822	0.2101;-0.2101	5.821e-01;5.821e-01	8.154e-04;8.153e-04	0.4625;0.5375	0.6804;0.3196	t|1e1.1o1|1e2.1o1	2	3	0;0	chr2	+	112097437-112163728;112146630-112163728	112096170-112097437;112146586-112146630;112163728-112163822		http://genome.ucsc.edu/cgi-bin/hgTracks?db=GRCm39&position=chr2%3A112163822-112096170
Ube4b	ENSMUSG00000028960.21	ENSMUSG00000028960.21:s:149465640-149465868	0.2880;-0.2880	9.207e-01;9.207e-01	8.986e-07;8.984e-07	0.5278;0.4722	0.8178;0.1822	s|1e1.1o1|1e2.1o1	2	3	0;0	chr4	-	149465228-149465640;149457426-149465640	149457285-149457426;149465132-149465228;149465640-149465868		http://genome.ucsc.edu/cgi-bin/hgTracks?db=GRCm39&position=chr4%3A149465868-149457285
Ube4b	ENSMUSG00000028960.21	ENSMUSG00000028960.21:t:149457285-149457426	-0.2250;0.0517;0.1550	6.966e-01;2.631e-03;2.436e-01	6.622e-06;2.597e-01;1.383e-02	0.3482;0.1203;0.5294	0.1252;0.1780;0.6897	t|1e1.1o1|1e2.1o1|1e3.1o1	3	4	0;0;0	chr4	-	149457426-149465640;149457426-149464491;149457426-149463729	149457285-149457426;149463729-149463866;149464491-149464795;149465640-149465868		http://genome.ucsc.edu/cgi-bin/hgTracks?db=GRCm39&position=chr4%3A149465868-149457285
Mtus1	ENSMUSG00000045636.17	ENSMUSG00000045636.17:t:41475417-41475939	-0.2060;0.2081;0.0000	5.424e-01;5.589e-01;4.842e-21	4.422e-05;3.587e-05;1.000e+00	0.6117;0.3859;0.0019	0.4094;0.5902;0.0004	t|1e1.1o1|1e2.1o1|1e3.1o1	3	4	0;0;0	chr8	-	41475631-41501085;41475631-41494510;41475631-41492322	41475417-41475939;41492322-41492624;41494510-41494903;41501085-41501123		http://genome.ucsc.edu/cgi-bin/hgTracks?db=GRCm39&position=chr8%3A41501123-41475417
