# Supplementary material for: Knock-in Mouse Model of Hereditary Myopathy with Early Respiratory Failure Carrying the Titin Variant Corresponding to Human p.N31786K
Source: Research Square preprint supplement (doi:10.21203/rs.3.rs-8910535/v1), 2026-02-23
Supplement: Supplementary file 4 [file df208ccb80bccc7cbf650ab5.xlsx]

## Sheet: Sheet1
Geneid	baseMean	log2FoldChange	lfcSE	pvalue	padj	GeneName	reg_type
ENSMUSG00000000085.17	899.624	0.42782	0.0992933	5.7859e-06	7.37403e-05	Scmh1	Up regulation
ENSMUSG00000000182.10	1.87564	0.935997	0.856085	0.00621673	0.0279558	Fgf23	Up regulation
ENSMUSG00000000214.12	56.8797	7.13678	0.634087	1.01437e-32	6.38828e-30	Th	Up regulation
ENSMUSG00000000223.14	484.049	0.707581	0.349628	0.00419926	0.0203432	Drp2	Up regulation
ENSMUSG00000000296.9	701.032	0.522014	0.142992	5.40217e-05	0.00050705	Tpd52l1	Up regulation
ENSMUSG00000000340.11	918.648	0.717267	0.217046	7.72569e-05	0.00069604	Dbt	Up regulation
ENSMUSG00000000374.9	1752.67	0.27225	0.114375	0.0112885	0.045219	Trappc10	Up regulation
ENSMUSG00000000439.10	1093.1	0.687042	0.182524	1.47712e-05	0.000166878	Mkrn2	Up regulation
ENSMUSG00000000441.18	3122.31	0.492665	0.162907	0.0006019	0.00403576	Raf1	Up regulation
ENSMUSG00000000538.19	2660.05	0.403659	0.104945	4.73899e-05	0.000453206	Tom1l2	Up regulation
ENSMUSG00000000561.15	225.332	0.347368	0.135901	0.00519502	0.0242043	Wdr77	Up regulation
ENSMUSG00000000567.6	456.377	1.03367	0.503923	0.00158516	0.00907344	Sox9	Up regulation
ENSMUSG00000000628.11	13194.5	0.357036	0.144621	0.00633843	0.0283549	Hk2	Up regulation
ENSMUSG00000000631.21	21643.7	0.950731	0.244453	4.45747e-06	5.85434e-05	Myo18a	Up regulation
ENSMUSG00000000708.15	2701.75	0.933149	0.085494	4.54102e-29	1.92219e-26	Kat2b	Up regulation
ENSMUSG00000000711.4	1536.22	0.477341	0.159711	0.000733891	0.00476245	Rab5b	Up regulation
ENSMUSG00000000738.19	2762.91	0.574927	0.191008	0.000408895	0.00290696	Spg7	Up regulation
ENSMUSG00000000740.13	3323.51	0.721218	0.13148	2.9007e-09	8.46315e-08	Rpl13	Up regulation
ENSMUSG00000000743.10	621.413	0.3084	0.122828	0.00693163	0.0305117	Chmp1a	Up regulation
ENSMUSG00000000751.14	1348.52	0.511672	0.114462	1.7174e-06	2.49549e-05	Rpa1	Up regulation
ENSMUSG00000000826.17	1410.57	0.360682	0.124248	0.00173941	0.00980424	Dnajc5	Up regulation
ENSMUSG00000000827.19	806.034	0.233216	0.0683087	0.000481945	0.00335501	Tpd52l2	Up regulation
ENSMUSG00000000959.8	967.531	0.267015	0.11336	0.0122748	0.0484481	Oxa1l	Up regulation
ENSMUSG00000001016.13	476.051	0.300858	0.0791142	8.8009e-05	0.000784426	Ilf2	Up regulation
ENSMUSG00000001017.17	1187.36	0.207404	0.0799925	0.00754746	0.0326437	Chtop	Up regulation
ENSMUSG00000001018.16	1108.33	0.3903	0.143108	0.00259265	0.0136288	Snapin	Up regulation
ENSMUSG00000001052.16	1055.71	0.311356	0.0672669	2.20452e-06	3.13797e-05	Sec24b	Up regulation
ENSMUSG00000001127.13	1191.98	0.508232	0.0898638	3.49874e-09	1.00491e-07	Araf	Up regulation
ENSMUSG00000001134.10	209.192	0.374692	0.125738	0.00127599	0.00756194	Uxt	Up regulation
ENSMUSG00000001138.14	426.308	0.691007	0.118002	3.76163e-10	1.30725e-08	Cnnm3	Up regulation
ENSMUSG00000001150.8	1345.05	0.264175	0.0803933	0.000699477	0.00457361	Mcm3ap	Up regulation
ENSMUSG00000001151.11	8158.92	0.904014	0.0837236	1.61793e-28	6.6312e-26	Pcnt	Up regulation
ENSMUSG00000001156.10	302.857	0.830075	0.148107	1.05085e-09	3.35403e-08	Mxd1	Up regulation
ENSMUSG00000001289.13	1516.76	0.460445	0.133899	0.000169611	0.00137117	Pfdn5	Up regulation
ENSMUSG00000001333.10	1744.27	0.671213	0.180634	1.92399e-05	0.000208824	Sync	Up regulation
ENSMUSG00000001348.16	77.4111	2.19841	0.574624	7.57213e-07	1.19877e-05	Acp5	Up regulation
ENSMUSG00000001366.15	1103.47	0.856446	0.112975	1.60988e-15	1.49368e-13	Fbxo9	Up regulation
ENSMUSG00000001419.18	6480.47	0.612519	0.113207	7.57574e-09	2.01248e-07	Mef2d	Up regulation
ENSMUSG00000001420.14	43.6161	0.504548	0.242628	0.0083813	0.0355417	Tmem79	Up regulation
ENSMUSG00000001507.17	293.684	0.930413	0.32819	0.000221278	0.00172097	Itga3	Up regulation
ENSMUSG00000001508.16	2752.58	0.68905	0.160093	1.42256e-06	2.1074e-05	Sgca	Up regulation
ENSMUSG00000001604.15	8166.09	0.396378	0.174406	0.00883184	0.0369726	Tcea3	Up regulation
ENSMUSG00000001674.12	351.891	0.259539	0.10917	0.0118678	0.0471008	Ddx18	Up regulation
ENSMUSG00000001687.16	3965.29	0.559244	0.16074	8.45913e-05	0.00075579	Ubl3	Up regulation
ENSMUSG00000001767.6	998.771	0.55548	0.136988	8.55156e-06	0.000103327	Crnkl1	Up regulation
ENSMUSG00000001785.14	561.543	0.641704	0.10991	5.36051e-10	1.81645e-08	Pwp1	Up regulation
ENSMUSG00000001802.17	250.701	0.318729	0.126093	0.00634688	0.0283731	Lrp3	Up regulation
ENSMUSG00000001844.11	428.825	0.902062	0.110854	1.834e-17	2.28771e-15	Zdhhc4	Up regulation
ENSMUSG00000001847.15	3430.52	0.276797	0.106676	0.0061381	0.027689	Rac1	Up regulation
ENSMUSG00000001864.14	171.57	0.590655	0.251729	0.00282872	0.0146169	Aif1l	Up regulation
ENSMUSG00000001891.17	10442.7	0.460888	0.208175	0.0074445	0.0323072	Ugp2	Up regulation
ENSMUSG00000001909.17	643.746	0.787546	0.089614	8.01112e-20	1.3699e-17	Trmt1	Up regulation
ENSMUSG00000001911.17	14485.5	0.396202	0.142009	0.0020862	0.0114102	Nfix	Up regulation
ENSMUSG00000001924.16	3589.66	0.248931	0.0949047	0.00618583	0.0278508	Uba1	Up regulation
ENSMUSG00000001962.9	463.722	0.399783	0.122669	0.00044317	0.00312141	Fam50a	Up regulation
ENSMUSG00000001964.15	291.914	0.589997	0.103069	1.42221e-09	4.40851e-08	Emd	Up regulation
ENSMUSG00000002014.13	772.5	0.409798	0.121418	0.000279254	0.00209246	Ssr4	Up regulation
ENSMUSG00000002028.14	3562.48	0.393983	0.103532	5.86549e-05	0.000544561	Kmt2a	Up regulation
ENSMUSG00000002031.14	288.066	0.243641	0.101428	0.0116667	0.0464528	Ift46	Up regulation
ENSMUSG00000002052.7	3186.99	0.422189	0.0963718	4.29509e-06	5.67571e-05	Supt6	Up regulation
ENSMUSG00000002076.13	29.1962	2.79565	0.430642	1.89603e-13	1.19994e-11	Hsf2bp	Up regulation
ENSMUSG00000002083.14	54.3028	0.656898	0.304357	0.00356469	0.0177451	Bbc3	Up regulation
ENSMUSG00000002102.16	4670.94	0.396505	0.0958995	1.46552e-05	0.000166039	Psmc3	Up regulation
ENSMUSG00000002104.12	431.281	0.281176	0.108293	0.00601719	0.0272292	Rapsn	Up regulation
ENSMUSG00000002107.20	2106.7	0.577359	0.255115	0.00375608	0.0185406	Celf2	Up regulation
ENSMUSG00000002221.12	566.894	0.430002	0.0782679	1.38843e-08	3.45383e-07	Paxip1	Up regulation
ENSMUSG00000002222.15	4220.95	0.773241	0.159669	7.67863e-08	1.59766e-06	Rmnd5a	Up regulation
ENSMUSG00000002250.17	886.17	0.388443	0.112966	0.000246457	0.00188904	Ppard	Up regulation
ENSMUSG00000002265.18	5077.72	0.921984	0.320987	0.000199391	0.00157639	Peg3	Up regulation
ENSMUSG00000002307.17	421.003	0.295699	0.119137	0.00787992	0.0338312	Daxx	Up regulation
ENSMUSG00000002319.17	442.7	0.470769	0.173248	0.00177212	0.00995605	Ipo4	Up regulation
ENSMUSG00000002341.9	1.65543	0.866489	0.841123	0.0082319	0.0350001	Ncan	Up regulation
ENSMUSG00000002342.18	791.211	0.2719	0.105747	0.00667459	0.0295769	Tmem161a	Up regulation
ENSMUSG00000002455.15	1678.92	0.302716	0.063317	1.07943e-06	1.64631e-05	Prpf6	Up regulation
ENSMUSG00000002496.11	2819.66	0.504705	0.109945	1.013e-06	1.55141e-05	Tsc2	Up regulation
ENSMUSG00000002688.9	157.273	0.850531	0.25657	4.99727e-05	0.000473695	Prkd1	Up regulation
ENSMUSG00000002718.15	1698.75	0.407214	0.177394	0.00790307	0.0339035	Cse1l	Up regulation
ENSMUSG00000002748.8	4065.34	0.278788	0.0432508	7.76743e-11	3.09792e-09	Baz1b	Up regulation
ENSMUSG00000002769.10	40.5858	2.27946	0.562216	2.62826e-07	4.73582e-06	Gnmt	Up regulation
ENSMUSG00000002803.15	342.266	0.348601	0.137339	0.00543144	0.0250259	Btbd6	Up regulation
ENSMUSG00000002804.5	143.372	0.759546	0.166805	3.35709e-07	5.87685e-06	Nudt14	Up regulation
ENSMUSG00000002831.16	8271	1.48096	0.112158	7.58704e-41	9.3288e-38	Plin4	Up regulation
ENSMUSG00000002833.12	1224.29	0.349441	0.134644	0.0046054	0.0219038	Hdgfl2	Up regulation
ENSMUSG00000002910.12	1110.87	2.03147	0.60629	5.44627e-06	6.99991e-05	Arrdc2	Up regulation
ENSMUSG00000002957.12	2442.69	0.342863	0.100084	0.00031761	0.00233648	Ap2a2	Up regulation
ENSMUSG00000002968.10	1496.64	0.521839	0.142656	5.25442e-05	0.000495162	Med25	Up regulation
ENSMUSG00000002981.11	1566.49	0.406422	0.093003	4.89474e-06	6.37675e-05	Clptm1	Up regulation
ENSMUSG00000002996.18	1560.68	0.50086	0.135908	5.31722e-05	0.00050035	Hbp1	Up regulation
ENSMUSG00000003031.15	1078.73	0.352675	0.130496	0.003324	0.0167373	Cdkn1b	Up regulation
ENSMUSG00000003154.17	1472.33	0.406694	0.155253	0.00327979	0.0165405	Foxj2	Up regulation
ENSMUSG00000003226.8	6606.71	0.429103	0.129987	0.000329231	0.00241402	Ranbp2	Up regulation
ENSMUSG00000003234.17	1090.09	0.276193	0.0864367	0.000923789	0.00576024	Abcf3	Up regulation
ENSMUSG00000003235.14	1569.42	0.502627	0.100401	1.29043e-07	2.50528e-06	Eif2b5	Up regulation
ENSMUSG00000003308.16	1622.65	0.64013	0.130615	1.00092e-07	2.01755e-06	Keap1	Up regulation
ENSMUSG00000003344.16	695.741	0.619263	0.142289	1.60505e-06	2.34412e-05	Btbd2	Up regulation
ENSMUSG00000003360.16	2580.83	0.370951	0.122492	0.00110959	0.00670979	Ddx23	Up regulation
ENSMUSG00000003380.12	928.414	0.410572	0.0916333	2.87624e-06	3.96728e-05	Rabac1	Up regulation
ENSMUSG00000003429.12	1407.89	0.469939	0.113282	9.33583e-06	0.000111757	Rps11	Up regulation
ENSMUSG00000003435.10	3257.59	0.542954	0.102129	1.93047e-08	4.68483e-07	Supt5	Up regulation
ENSMUSG00000003437.15	1037.27	0.277241	0.093912	0.00206741	0.0113201	Paf1	Up regulation
ENSMUSG00000003477.6	307.028	4.64912	0.227609	1.44251e-97	3.72471e-93	Inmt	Up regulation
ENSMUSG00000003526.13	502.69	2.38795	0.148514	2.35598e-60	1.21667e-56	Prodh	Up regulation
ENSMUSG00000003531.16	437.133	0.605829	0.178357	9.00453e-05	0.000799814	Dgcr6	Up regulation
ENSMUSG00000003534.18	676.309	0.453381	0.203366	0.00743368	0.0322868	Ddr1	Up regulation
ENSMUSG00000003541.7	70.4789	0.537518	0.194777	0.00110086	0.00666636	Ier3	Up regulation
ENSMUSG00000003660.11	3766.82	0.450189	0.0779256	2.40794e-09	7.09764e-08	Snrnp200	Up regulation
ENSMUSG00000003662.11	818.308	0.28111	0.0795723	0.000269444	0.00203728	Ciao1	Up regulation
ENSMUSG00000003721.15	695.72	0.459043	0.168057	0.00180616	0.0101167	Insig2	Up regulation
ENSMUSG00000003752.10	218.807	0.636347	0.232095	0.000726273	0.00471895	Itpkc	Up regulation
ENSMUSG00000003809.15	606.772	0.729554	0.162105	4.81611e-07	8.05942e-06	Gcdh	Up regulation
ENSMUSG00000003810.15	5405.89	1.04949	0.199213	6.10548e-09	1.65915e-07	Mast2	Up regulation
ENSMUSG00000003813.16	2591.9	0.636767	0.146947	1.59704e-06	2.33375e-05	Rad23a	Up regulation
ENSMUSG00000003849.9	368.757	0.815909	0.332797	0.000938938	0.00584482	Nqo1	Up regulation
ENSMUSG00000003865.17	11943.5	0.496928	0.158477	0.000405309	0.00288544	Gys1	Up regulation
ENSMUSG00000003882.6	14.8814	0.963621	0.461474	0.00172897	0.00976461	Il7r	Up regulation
ENSMUSG00000003949.17	371.446	0.682234	0.216263	0.000151884	0.00125297	Hlf	Up regulation
ENSMUSG00000003970.10	6544.44	0.634717	0.144054	1.15343e-06	1.74169e-05	Rpl8	Up regulation
ENSMUSG00000003992.16	370.294	0.350591	0.126264	0.00268766	0.014042	Ssbp2	Up regulation
ENSMUSG00000004032.11	840.093	0.638854	0.167351	1.48235e-05	0.000167363	Gstm5	Up regulation
ENSMUSG00000004056.17	3090.86	0.489121	0.181541	0.00172414	0.00974584	Akt2	Up regulation
ENSMUSG00000004071.14	1569.24	0.408505	0.164938	0.00485518	0.0228937	Cdip1	Up regulation
ENSMUSG00000004085.15	19504.8	0.955472	0.114848	4.0654e-18	5.49595e-16	Map3k20	Up regulation
ENSMUSG00000004264.18	1961.82	0.316602	0.107378	0.00181344	0.0101418	Phb2	Up regulation
ENSMUSG00000004328.16	57.6584	2.06055	0.257451	2.13879e-17	2.62979e-15	Hif3a	Up regulation
ENSMUSG00000004347.18	99.887	0.511844	0.180025	0.000971224	0.00600473	Pde1c	Up regulation
ENSMUSG00000004356.9	1088.65	0.508597	0.0838541	2.96415e-10	1.04274e-08	Utp20	Up regulation
ENSMUSG00000004393.11	550.152	0.62612	0.165033	1.7386e-05	0.000191684	Ddx56	Up regulation
ENSMUSG00000004394.13	1075.41	0.485984	0.136502	9.36044e-05	0.000827159	Tmed4	Up regulation
ENSMUSG00000004535.13	3536.81	0.50752	0.123014	8.30911e-06	0.00010106	Tax1bp1	Up regulation
ENSMUSG00000004558.16	20719.1	0.799838	0.148866	4.21292e-09	1.17475e-07	Ndrg2	Up regulation
ENSMUSG00000004897.18	4818.22	0.425576	0.151916	0.00173885	0.00980324	Hdgf	Up regulation
ENSMUSG00000004934.15	509.478	0.519728	0.135826	2.72145e-05	0.000281985	Pias4	Up regulation
ENSMUSG00000004937.7	1907.26	0.472082	0.104034	1.5736e-06	2.3034e-05	Sgta	Up regulation
ENSMUSG00000004951.11	2374.04	0.844523	0.404223	0.00234632	0.0125772	Hspb1	Up regulation
ENSMUSG00000004996.10	305.734	0.387096	0.136499	0.00189461	0.0105161	Mri1	Up regulation
ENSMUSG00000005148.9	283.291	0.911268	0.252771	1.47741e-05	0.000166878	Klf5	Up regulation
ENSMUSG00000005198.16	3138.47	0.538788	0.136071	1.40918e-05	0.000160293	Polr2a	Up regulation
ENSMUSG00000005262.14	878.275	0.429832	0.0980588	4.07692e-06	5.4235e-05	Ufd1	Up regulation
ENSMUSG00000005312.16	2502.36	0.353819	0.0997772	0.000193876	0.00153891	Ubqln1	Up regulation
ENSMUSG00000005362.15	814.331	0.832839	0.165283	2.38604e-08	5.69935e-07	Crbn	Up regulation
ENSMUSG00000005371.16	1562.95	0.30186	0.0902058	0.000497381	0.00344775	Fbxo11	Up regulation
ENSMUSG00000005474.10	80.2438	0.869151	0.487722	0.00452588	0.0215933	Myl10	Up regulation
ENSMUSG00000005506.17	2211.76	0.40028	0.104647	5.25399e-05	0.000495162	Celf1	Up regulation
ENSMUSG00000005533.11	1608.08	0.863411	0.100582	4.24498e-19	6.56345e-17	Igf1r	Up regulation
ENSMUSG00000005534.11	4446.71	0.847182	0.153898	1.80599e-09	5.46687e-08	Insr	Up regulation
ENSMUSG00000005580.12	2485.27	0.582414	0.169312	8.65489e-05	0.000771944	Adcy9	Up regulation
ENSMUSG00000005583.17	20833.5	0.574573	0.170897	0.000120132	0.0010234	Mef2c	Up regulation
ENSMUSG00000005610.18	16733	0.366934	0.135201	0.00301261	0.0153946	Eif4g2	Up regulation
ENSMUSG00000005615.16	3292	0.507195	0.231402	0.00626818	0.0281431	Pcyt1a	Up regulation
ENSMUSG00000005621.12	1046.96	0.211625	0.0780185	0.00525301	0.0243822	Zfp592	Up regulation
ENSMUSG00000005625.16	5056.21	0.781402	0.115227	6.55166e-13	3.74271e-11	Psmd4	Up regulation
ENSMUSG00000005698.16	1171.38	0.221568	0.0800459	0.00433281	0.0208377	Ctcf	Up regulation
ENSMUSG00000005705.11	53.2121	1.01227	0.929773	0.00376759	0.0185867	Agrp	Up regulation
ENSMUSG00000005718.9	162.215	0.849152	0.287581	0.000179007	0.00143634	Tfap4	Up regulation
ENSMUSG00000005779.13	1367.67	0.59406	0.146279	6.71349e-06	8.37198e-05	Psmb4	Up regulation
ENSMUSG00000005802.13	844.114	0.405883	0.154432	0.00321164	0.0162622	Slc30a4	Up regulation
ENSMUSG00000005871.16	3420.19	0.187945	0.054028	0.000421537	0.00298697	Apc	Up regulation
ENSMUSG00000005886.15	1625.34	0.292126	0.0553188	8.2835e-08	1.70974e-06	Ncoa2	Up regulation
ENSMUSG00000005893.15	1464.17	0.394398	0.0851939	1.53969e-06	2.26403e-05	Nr2c2	Up regulation
ENSMUSG00000005936.20	1062.16	0.416836	0.0924605	2.44661e-06	3.43523e-05	Kctd20	Up regulation
ENSMUSG00000005981.12	2889.88	0.315501	0.100287	0.00095017	0.00589485	Trap1	Up regulation
ENSMUSG00000006005.19	7419.75	0.496726	0.107266	8.74831e-07	1.35751e-05	Tpr	Up regulation
ENSMUSG00000006010.15	710.168	0.483919	0.118886	1.20748e-05	0.000140316	Odr4	Up regulation
ENSMUSG00000006014.18	548.164	1.70033	0.470746	5.41619e-06	6.97166e-05	Prg4	Up regulation
ENSMUSG00000006024.14	1902.75	0.447282	0.15849	0.00145817	0.00844769	Napa	Up regulation
ENSMUSG00000006127.10	635.79	0.582776	0.115107	5.9455e-08	1.27719e-06	Inpp5k	Up regulation
ENSMUSG00000006134.5	841.54	0.279324	0.105505	0.0052232	0.0242797	Crkl	Up regulation
ENSMUSG00000006215.13	974.009	0.423334	0.133898	0.000550156	0.00374255	Zbtb17	Up regulation
ENSMUSG00000006273.15	1145.82	0.471452	0.174148	0.00181994	0.0101716	Atp6v1b2	Up regulation
ENSMUSG00000006289.15	686.344	0.312218	0.104006	0.0015525	0.00891617	Osgep	Up regulation
ENSMUSG00000006299.14	2287.56	0.456603	0.11701	2.85161e-05	0.000293586	Aamp	Up regulation
ENSMUSG00000006301.18	1070.84	0.894649	0.161238	1.31843e-09	4.12144e-08	Tmbim1	Up regulation
ENSMUSG00000006333.15	4244.84	0.582513	0.130039	1.0877e-06	1.655e-05	Rps9	Up regulation
ENSMUSG00000006378.16	14.742	0.645843	0.33259	0.00640365	0.0285922	Gcat	Up regulation
ENSMUSG00000006392.17	519.195	0.283723	0.107499	0.00526836	0.0244403	Med8	Up regulation
ENSMUSG00000006418.18	720.793	0.407358	0.140642	0.00142064	0.00827855	Rnf114	Up regulation
ENSMUSG00000006435.17	1904.99	0.549231	0.180361	0.000415148	0.00294898	Neurl1a	Up regulation
ENSMUSG00000006462.8	160.492	1.28483	0.230367	1.29661e-09	4.06308e-08	A530013C23Rik	Up regulation
ENSMUSG00000006494.12	2981.46	0.662878	0.362685	0.00787403	0.0338126	Pdk1	Up regulation
ENSMUSG00000006587.7	196.591	1.62704	0.437292	4.34736e-06	5.73891e-05	Snai3	Up regulation
ENSMUSG00000006673.15	1655.82	0.243565	0.0798161	0.00165778	0.00942852	Qrich1	Up regulation
ENSMUSG00000006705.14	371.558	0.259436	0.109667	0.0122479	0.0483567	Pknox1	Up regulation
ENSMUSG00000006740.15	9580.7	0.567799	0.202235	0.000814232	0.00520532	Kif5b	Up regulation
ENSMUSG00000006920.15	1190.73	0.846859	0.0932399	4.99423e-21	1.0154e-18	Ezh1	Up regulation
ENSMUSG00000006941.6	351.154	0.410761	0.145018	0.00170406	0.00965561	Eif1b	Up regulation
ENSMUSG00000006998.17	5257.8	0.729024	0.116398	2.51173e-11	1.09553e-09	Psmd2	Up regulation
ENSMUSG00000007029.17	1364.21	0.415094	0.162856	0.00384596	0.0189294	Vars1	Up regulation
ENSMUSG00000007030.9	474.499	0.450817	0.139002	0.000359513	0.00260466	Vwa7	Up regulation
ENSMUSG00000007033.5	1078.64	0.971794	0.396283	0.000647376	0.00429163	Hspa1l	Up regulation
ENSMUSG00000007034.16	2.25335	1.70804	1.0086	0.000277043	0.00208254	Slc44a4	Up regulation
ENSMUSG00000007036.16	1504.22	0.353288	0.142621	0.00630082	0.0282336	Abhd16a	Up regulation
ENSMUSG00000007080.15	222.287	0.574194	0.140342	6.576e-06	8.25469e-05	Pole	Up regulation
ENSMUSG00000007097.15	63201.9	0.784613	0.19883	4.86079e-06	6.33571e-05	Atp1a2	Up regulation
ENSMUSG00000007216.7	220.4	0.701787	0.190418	1.90759e-05	0.000207306	Zfp775	Up regulation
ENSMUSG00000007415.16	1220.94	0.400778	0.115631	0.000209758	0.00164525	Gatad1	Up regulation
ENSMUSG00000007570.17	152.178	0.32762	0.145354	0.0126814	0.0497187	Fance	Up regulation
ENSMUSG00000007589.10	324.757	0.367504	0.084061	5.8467e-06	7.44416e-05	Tinf2	Up regulation
ENSMUSG00000007613.16	1013.33	0.973583	0.131869	7.09994e-15	5.89477e-13	Tgfbr1	Up regulation
ENSMUSG00000007653.13	23.7131	2.15845	0.620396	2.63948e-06	3.67012e-05	Gabrb2	Up regulation
ENSMUSG00000007656.15	1673.91	0.642145	0.234972	0.000728247	0.00473059	Arpp19	Up regulation
ENSMUSG00000007739.11	1712.66	0.485358	0.12224	1.82813e-05	0.000200017	Cct4	Up regulation
ENSMUSG00000007892.9	10024.2	0.750669	0.164455	3.28005e-07	5.75759e-06	Rplp1	Up regulation
ENSMUSG00000008035.13	985.675	1.62806	0.275058	1.52311e-10	5.65873e-09	Mid1ip1	Up regulation
ENSMUSG00000008090.15	1074.67	0.846151	0.438574	0.00346505	0.017336	Fgfrl1	Up regulation
ENSMUSG00000008305.20	1029.96	0.972675	0.218466	3.68107e-07	6.37485e-06	Tle1	Up regulation
ENSMUSG00000008333.13	316.927	0.418986	0.1409	0.00104781	0.0063917	Snrpb2	Up regulation
ENSMUSG00000008348.10	1304.79	0.794706	0.216864	1.50724e-05	0.000169653	Ubc	Up regulation
ENSMUSG00000008429.9	1186.65	0.582985	0.128929	8.88707e-07	1.37739e-05	Herpud2	Up regulation
ENSMUSG00000008604.12	1761.03	0.342142	0.148761	0.0105955	0.0429426	Ubqln4	Up regulation
ENSMUSG00000008668.16	2070.21	0.647547	0.137544	2.54183e-07	4.58969e-06	Rps18	Up regulation
ENSMUSG00000008682.14	2029.19	0.45356	0.104556	4.40774e-06	5.79823e-05	Rpl10	Up regulation
ENSMUSG00000008683.17	1928.11	0.648255	0.180375	3.46336e-05	0.000345413	Rps15a	Up regulation
ENSMUSG00000008690.16	1343.87	0.391566	0.12155	0.000525738	0.00360656	Ncaph2	Up regulation
ENSMUSG00000008813.14	14.0134	2.06092	0.727954	1.92691e-05	0.000209053	Tppp2	Up regulation
ENSMUSG00000008855.18	2178.56	0.451212	0.145398	0.000578591	0.00390073	Hdac5	Up regulation
ENSMUSG00000009112.5	2485.31	0.367877	0.11524	0.000650136	0.00430771	Bcl2l13	Up regulation
ENSMUSG00000009214.10	132.297	0.751378	0.483192	0.010405	0.0422965	Mymk	Up regulation
ENSMUSG00000009470.18	2008.34	0.257803	0.0765843	0.000535489	0.00366372	Tnpo1	Up regulation
ENSMUSG00000009471.5	460.622	0.71632	0.37817	0.00560144	0.0256399	Myod1	Up regulation
ENSMUSG00000009487.11	25.0787	0.886316	0.635924	0.00832412	0.0353282	Otog	Up regulation
ENSMUSG00000009535.14	794.677	0.493791	0.171894	0.000974296	0.00601849	Rnmt	Up regulation
ENSMUSG00000009549.15	1822.13	0.449095	0.13828	0.000357223	0.00259243	Srp14	Up regulation
ENSMUSG00000009647.14	1554.13	0.531012	0.237231	0.00496445	0.0233237	Mcu	Up regulation
ENSMUSG00000009739.19	434.035	0.369544	0.135459	0.00285421	0.014722	Pou6f1	Up regulation
ENSMUSG00000009894.16	681.72	0.35846	0.162127	0.0123314	0.0486122	Snap47	Up regulation
ENSMUSG00000009927.10	2420	0.650024	0.140803	3.92592e-07	6.72222e-06	Rps25	Up regulation
ENSMUSG00000010045.3	333.078	0.319968	0.133726	0.00913011	0.0380056	Tmem115	Up regulation
ENSMUSG00000010392.9	510.754	0.211774	0.0816706	0.00746318	0.0323659	Gosr1	Up regulation
ENSMUSG00000010406.13	966.109	0.472217	0.149148	0.000417927	0.00296464	Mrpl52	Up regulation
ENSMUSG00000010453.13	1924.89	0.397515	0.08082	3.61972e-07	6.29392e-06	Kansl3	Up regulation
ENSMUSG00000010492.11	942.788	0.910784	0.424389	0.00170513	0.00965952	Uckl1os	Up regulation
ENSMUSG00000010517.8	1901.77	0.663296	0.157451	2.41944e-06	3.40448e-05	Faf1	Up regulation
ENSMUSG00000010755.18	1310.65	0.578116	0.0673416	1.31876e-18	1.90233e-16	Cars1	Up regulation
ENSMUSG00000010936.12	734.485	0.49168	0.136272	7.55451e-05	0.000682284	Vac14	Up regulation
ENSMUSG00000011096.18	1670.4	0.392474	0.142837	0.00241378	0.0128694	Akt1s1	Up regulation
ENSMUSG00000011148.15	13721.4	0.498815	0.22399	0.00597207	0.027063	Adss1	Up regulation
ENSMUSG00000011179.9	2128.54	0.494169	0.216616	0.00531215	0.0246036	Odc1	Up regulation
ENSMUSG00000011306.8	566.617	0.320463	0.108705	0.00178882	0.0100346	Sugp1	Up regulation
ENSMUSG00000011382.9	836.08	0.841898	0.360366	0.00121837	0.00726717	Dhdh	Up regulation
ENSMUSG00000011427.17	416.684	0.312773	0.103352	0.00143081	0.00831906	Zfp790	Up regulation
ENSMUSG00000012114.18	1113.04	0.255867	0.0805302	0.00104725	0.0063917	Med15	Up regulation
ENSMUSG00000012296.17	975.554	0.627497	0.132775	2.58095e-07	4.65706e-06	Tjap1	Up regulation
ENSMUSG00000012405.17	555.729	0.384292	0.117851	0.000474904	0.00331419	Rpl15	Up regulation
ENSMUSG00000012535.15	1426.84	0.305341	0.111967	0.00375795	0.0185463	Tnpo3	Up regulation
ENSMUSG00000012705.17	15.9592	1.66032	0.557	3.84923e-05	0.000378362	Retn	Up regulation
ENSMUSG00000012848.16	3092.29	0.800629	0.157527	2.04341e-08	4.94497e-07	Rps5	Up regulation
ENSMUSG00000013089.16	468.613	0.797154	0.139605	6.11503e-10	2.04529e-08	Etv5	Up regulation
ENSMUSG00000013160.8	688.341	0.465184	0.127049	7.12519e-05	0.000648044	Atp6v0d1	Up regulation
ENSMUSG00000013419.8	2989.22	0.653243	0.165529	8.08424e-06	9.87432e-05	Zbtb47	Up regulation
ENSMUSG00000013539.15	765.985	1.33406	0.223101	1.2985e-10	4.93792e-09	Tango2	Up regulation
ENSMUSG00000013646.18	615.017	0.387272	0.11488	0.000316653	0.00233142	Sh3bp5l	Up regulation
ENSMUSG00000013736.17	519.693	0.409076	0.129312	0.00058797	0.00395673	Trnt1	Up regulation
ENSMUSG00000013822.8	291.812	0.408954	0.160077	0.00390034	0.0191538	Elof1	Up regulation
ENSMUSG00000013973.13	538.182	0.461317	0.124628	6.22429e-05	0.000574196	Dedd	Up regulation
ENSMUSG00000013997.11	305.481	0.323721	0.121668	0.00425301	0.0205457	Nit1	Up regulation
ENSMUSG00000014077.14	1214.93	0.425712	0.136201	0.0006138	0.00410169	Chp1	Up regulation
ENSMUSG00000014243.6	351.888	0.45238	0.202978	0.00748343	0.0324428	Zswim7	Up regulation
ENSMUSG00000014353.16	690.488	0.235277	0.0742183	0.00113775	0.00684801	Tmem87b	Up regulation
ENSMUSG00000014355.11	2220.41	0.252674	0.091537	0.00406755	0.0198295	Anapc1	Up regulation
ENSMUSG00000014402.16	984.491	0.421713	0.0791276	3.62989e-08	8.28713e-07	Tsg101	Up regulation
ENSMUSG00000014470.5	663.989	0.501814	0.100059	1.23753e-07	2.41347e-06	Rnf166	Up regulation
ENSMUSG00000014496.9	2916.88	0.422076	0.176452	0.00570455	0.0260611	Ankrd28	Up regulation
ENSMUSG00000014504.17	747.926	0.397139	0.177796	0.00971096	0.0399533	Srp19	Up regulation
ENSMUSG00000014592.23	1286.18	1.10937	0.294702	6.49785e-06	8.16315e-05	Camta1	Up regulation
ENSMUSG00000014609.17	174.187	0.696136	0.291732	0.00165473	0.00941325	Chrne	Up regulation
ENSMUSG00000014748.14	781.579	0.36668	0.156292	0.00841684	0.0356573	Tex261	Up regulation
ENSMUSG00000014763.9	801.187	0.297814	0.082123	0.000178151	0.00143036	Fam120b	Up regulation
ENSMUSG00000014769.11	2021.84	0.719209	0.185654	8.23859e-06	0.000100249	Psmb1	Up regulation
ENSMUSG00000014771.14	211.431	0.565434	0.126771	1.31307e-06	1.95416e-05	Pdcd2	Up regulation
ENSMUSG00000014776.8	2200.56	0.629839	0.273929	0.00272139	0.0141843	Nol3	Up regulation
ENSMUSG00000014850.16	1002.87	0.638984	0.195771	0.000124429	0.00105479	Msh3	Up regulation
ENSMUSG00000014859.10	958.949	0.359632	0.127662	0.0022822	0.0122794	E2f4	Up regulation
ENSMUSG00000014873.16	256.454	0.256094	0.105528	0.0105044	0.042621	Surf2	Up regulation
ENSMUSG00000014905.5	840.586	0.654749	0.148074	9.69217e-07	1.49232e-05	Dnajb9	Up regulation
ENSMUSG00000014956.16	8611.58	0.897767	0.148737	7.1907e-11	2.90111e-09	Ppp1cb	Up regulation
ENSMUSG00000014959.13	1302.64	0.338298	0.140588	0.00815162	0.0347217	Gorasp2	Up regulation
ENSMUSG00000015023.8	896.609	0.464768	0.118955	2.672e-05	0.000277418	Ddx19a	Up regulation
ENSMUSG00000015087.15	3426.05	0.410407	0.126598	0.000446193	0.00313928	Rabl6	Up regulation
ENSMUSG00000015090.14	5.0566	1.08064	0.59303	0.00225789	0.0121714	Ptgds	Up regulation
ENSMUSG00000015095.13	1490.38	0.315293	0.131981	0.00939892	0.0388925	Fbxw5	Up regulation
ENSMUSG00000015149.15	1343.7	0.333121	0.103235	0.000671458	0.0044342	Sirt2	Up regulation
ENSMUSG00000015189.13	709.333	0.372764	0.113311	0.000453073	0.00318682	Casd1	Up regulation
ENSMUSG00000015214.15	1115.11	0.744333	0.138735	5.22651e-09	1.43263e-07	Mtmr1	Up regulation
ENSMUSG00000015342.7	243.302	0.997656	0.228879	5.57634e-07	9.13042e-06	Xk	Up regulation
ENSMUSG00000015357.11	2003.07	0.454224	0.142928	0.000442151	0.00311508	Clpx	Up regulation
ENSMUSG00000015363.14	826.993	0.623654	0.0944223	4.42339e-12	2.19647e-10	Trabd	Up regulation
ENSMUSG00000015488.15	498.904	0.367606	0.119818	0.000989014	0.00610065	Cacfd1	Up regulation
ENSMUSG00000015522.20	2370.22	0.891397	0.0687097	7.95921e-40	8.56312e-37	Arnt	Up regulation
ENSMUSG00000015536.15	608.796	0.469307	0.227384	0.0103076	0.0419416	Mocs2	Up regulation
ENSMUSG00000015542.18	151.905	0.364462	0.118607	0.000987503	0.00609279	Nat9	Up regulation
ENSMUSG00000015597.18	959.601	0.727457	0.0883688	1.19075e-17	1.5146e-15	Zfp318	Up regulation
ENSMUSG00000015671.12	1113.5	0.350936	0.128814	0.00313978	0.0159622	Psma2	Up regulation
ENSMUSG00000015711.9	1358.7	0.754393	0.150623	3.47157e-08	7.96086e-07	Prune1	Up regulation
ENSMUSG00000015749.13	1503.18	0.337618	0.130376	0.00492789	0.0231984	Anp32e	Up regulation
ENSMUSG00000015837.16	10383	0.897606	0.11067	2.28997e-17	2.80234e-15	Sqstm1	Up regulation
ENSMUSG00000015839.7	1275.09	0.436387	0.120886	0.000101642	0.000887551	Nfe2l2	Up regulation
ENSMUSG00000015850.12	1691.88	1.83569	0.412408	1.70337e-07	3.22455e-06	Adamtsl4	Up regulation
ENSMUSG00000015944.10	2450.51	0.766427	0.209018	1.62653e-05	0.000181029	Castor2	Up regulation
ENSMUSG00000015971.6	554.635	0.297911	0.118121	0.00699215	0.0307309	Actr8	Up regulation
ENSMUSG00000016239.12	105.845	1.3497	0.352161	4.28463e-06	5.66512e-05	Lonrf3	Up regulation
ENSMUSG00000016308.14	469.818	0.357368	0.112575	0.000724497	0.00470978	Ube2a	Up regulation
ENSMUSG00000016327.10	835.069	1.40868	0.505271	0.000111108	0.000957264	Atp1b4	Up regulation
ENSMUSG00000016346.19	4.46132	0.864985	0.609778	0.00875479	0.0367225	Kcnq2	Up regulation
ENSMUSG00000016487.16	2923.12	0.79389	0.34104	0.00142391	0.00829575	Ppfibp1	Up regulation
ENSMUSG00000016534.16	2356.21	0.608266	0.173921	6.10321e-05	0.000564236	Lamp2	Up regulation
ENSMUSG00000017009.4	937.143	0.450399	0.192715	0.00571909	0.0260962	Sdc4	Up regulation
ENSMUSG00000017119.21	3334.06	0.339388	0.105356	0.000666714	0.00440625	Nbr1	Up regulation
ENSMUSG00000017204.5	3.84753	1.67216	1.03345	0.000313351	0.00230974	Gsdma	Up regulation
ENSMUSG00000017210.15	1063.25	0.282962	0.0958636	0.00203058	0.0111547	Med24	Up regulation
ENSMUSG00000017221.15	2275.08	0.461784	0.143751	0.000377187	0.00271291	Psmd3	Up regulation
ENSMUSG00000017264.17	933.937	0.28708	0.0695424	2.37021e-05	0.000249393	Exosc10	Up regulation
ENSMUSG00000017288.16	576.983	0.255207	0.0818335	0.00128104	0.00758317	Vps53	Up regulation
ENSMUSG00000017404.13	1766.09	0.513261	0.193091	0.00169321	0.00959832	Rpl19	Up regulation
ENSMUSG00000017428.17	2890.48	0.812608	0.147093	1.73209e-09	5.2741e-08	Psmd11	Up regulation
ENSMUSG00000017478.16	1369.24	0.249174	0.0803563	0.00138418	0.00809901	Zc3h18	Up regulation
ENSMUSG00000017491.10	308.832	0.618651	0.228171	0.000863052	0.00544862	Rarb	Up regulation
ENSMUSG00000017548.16	696.852	0.248231	0.0882732	0.00351829	0.0175547	Suz12	Up regulation
ENSMUSG00000017692.9	253.573	0.547401	0.296832	0.0119527	0.047387	Rhbdl3	Up regulation
ENSMUSG00000017707.10	3496.3	0.449641	0.127649	0.000131844	0.00111108	Serinc3	Up regulation
ENSMUSG00000017737.3	110.718	0.990018	0.78164	0.00570881	0.0260713	Mmp9	Up regulation
ENSMUSG00000017767.4	9.70002	0.675901	0.371881	0.00769577	0.033174	Spata25	Up regulation
ENSMUSG00000017801.16	208.005	0.297374	0.119043	0.00749131	0.0324607	Mlx	Up regulation
ENSMUSG00000017802.15	771.278	0.29694	0.110487	0.00436096	0.0209457	Retreg3	Up regulation
ENSMUSG00000017831.9	964.137	0.328092	0.104338	0.000908498	0.00568273	Rab5a	Up regulation
ENSMUSG00000017858.13	255.907	0.332038	0.107868	0.00111667	0.00674154	Ift52	Up regulation
ENSMUSG00000017999.17	639.354	0.469512	0.140655	0.000232517	0.0017938	Ddx27	Up regulation
ENSMUSG00000018076.13	2358.27	0.520886	0.124283	5.77625e-06	7.36641e-05	Med13l	Up regulation
ENSMUSG00000018126.16	45.0361	1.24071	0.367255	2.39868e-05	0.000251978	Baiap2l2	Up regulation
ENSMUSG00000018166.9	401.343	0.639895	0.281858	0.00282705	0.0146111	Erbb3	Up regulation
ENSMUSG00000018286.7	2232.63	0.251259	0.100477	0.00870086	0.0365487	Psmb6	Up regulation
ENSMUSG00000018339.13	2349.84	0.963649	0.226535	9.15711e-07	1.41669e-05	Gpx3	Up regulation
ENSMUSG00000018377.11	3004.52	0.661003	0.219975	0.000277965	0.00208698	Vezf1	Up regulation
ENSMUSG00000018401.18	573.418	0.440205	0.109028	1.77213e-05	0.000194467	Mtmr4	Up regulation
ENSMUSG00000018412.17	1286.2	0.34748	0.106012	0.000529202	0.00362935	Kansl1	Up regulation
ENSMUSG00000018427.9	389.37	0.326521	0.138442	0.00972758	0.0400153	Ypel2	Up regulation
ENSMUSG00000018501.18	8324.61	0.336825	0.0889293	8.15291e-05	0.000730351	Ncor1	Up regulation
ENSMUSG00000018541.11	355.034	0.222421	0.0819933	0.0051104	0.0238877	Cwc25	Up regulation
ENSMUSG00000018547.9	1662.56	0.651197	0.164218	7.53144e-06	9.26927e-05	Pip4k2b	Up regulation
ENSMUSG00000018559.17	1268.75	0.331498	0.118825	0.00280255	0.0145131	Ctdnep1	Up regulation
ENSMUSG00000018566.15	6335.08	0.909343	0.162729	1.03763e-09	3.32003e-08	Slc2a4	Up regulation
ENSMUSG00000018567.15	1318.99	0.557113	0.153639	4.88545e-05	0.000464973	Gabarap	Up regulation
ENSMUSG00000018581.16	4.96311	0.840079	0.658861	0.0111544	0.044751	Dnah11	Up regulation
ENSMUSG00000018648.16	130.114	0.506941	0.209457	0.00344136	0.0172408	Dusp14	Up regulation
ENSMUSG00000018707.14	17136.8	0.383689	0.167477	0.00896032	0.0374073	Dync1h1	Up regulation
ENSMUSG00000018733.11	158.285	0.667336	0.140897	2.0014e-07	3.72859e-06	Pex12	Up regulation
ENSMUSG00000018765.7	2331.86	0.52188	0.107835	2.69442e-07	4.83479e-06	Fxr2	Up regulation
ENSMUSG00000018800.15	1065.93	1.14174	0.334012	2.29868e-05	0.000242956	Abca5	Up regulation
ENSMUSG00000018809.3	168.104	0.613388	0.158693	1.38467e-05	0.000157713	Smyd4	Up regulation
ENSMUSG00000018932.10	3152.83	0.813507	0.183789	5.2521e-07	8.66546e-06	Map2k3	Up regulation
ENSMUSG00000019102.11	15.3156	2.65838	0.642318	6.86751e-08	1.44756e-06	Aldh3a1	Up regulation
ENSMUSG00000019132.12	1817.02	0.516794	0.162993	0.00032279	0.00237187	BC005537	Up regulation
ENSMUSG00000019189.14	374.282	0.402638	0.13427	0.00104926	0.00639889	Rnf145	Up regulation
ENSMUSG00000019210.11	1564.58	0.334377	0.0980675	0.000348947	0.00254094	Atp6v1e1	Up regulation
ENSMUSG00000019232.15	2.57275	2.11994	0.929364	4.30561e-05	0.000417952	Etnppl	Up regulation
ENSMUSG00000019278.6	474.655	1.29885	0.195783	2.04797e-12	1.0814e-10	Dpep1	Up regulation
ENSMUSG00000019368.14	1.70925	1.58665	1.09978	0.000381282	0.00274007	Sec14l4	Up regulation
ENSMUSG00000019373.12	1622.19	0.487773	0.154832	0.000405253	0.00288544	Cops3	Up regulation
ENSMUSG00000019487.12	3227.43	0.493764	0.0936799	3.33311e-08	7.67745e-07	Trip10	Up regulation
ENSMUSG00000019494.15	999.51	0.41383	0.129259	0.000503959	0.00348586	Cops6	Up regulation
ENSMUSG00000019505.8	3186.14	0.412849	0.123488	0.000308266	0.00228128	Ubb	Up regulation
ENSMUSG00000019528.19	4401.54	0.968062	0.13124	7.44142e-15	6.15849e-13	Gyg1	Up regulation
ENSMUSG00000019558.15	2836.12	0.412132	0.160283	0.00366381	0.0181371	Slc6a8	Up regulation
ENSMUSG00000019578.12	974.328	0.861853	0.147343	2.34073e-10	8.44135e-09	Ubxn6	Up regulation
ENSMUSG00000019715.15	794.307	0.539285	0.130464	6.67994e-06	8.34846e-05	Gle1	Up regulation
ENSMUSG00000019731.14	1539.77	0.664224	0.138766	1.58034e-07	3.01374e-06	Slc35e1	Up regulation
ENSMUSG00000019782.11	1779.69	0.568327	0.271307	0.00602758	0.0272667	Rwdd1	Up regulation
ENSMUSG00000019787.10	44326.6	0.739898	0.23987	0.000156197	0.00128404	Trdn	Up regulation
ENSMUSG00000019791.13	994.648	0.534399	0.167037	0.000265804	0.00201666	Hint3	Up regulation
ENSMUSG00000019795.18	2023.1	0.413991	0.138942	0.00105437	0.00642476	Pcmt1	Up regulation
ENSMUSG00000019802.14	1478.16	0.315632	0.0839689	9.93686e-05	0.000870352	Sec63	Up regulation
ENSMUSG00000019841.17	3110.66	0.77627	0.239854	8.10684e-05	0.000726828	Rev3l	Up regulation
ENSMUSG00000019848.15	755.652	1.05891	0.239582	4.14314e-07	7.05208e-06	Popdc3	Up regulation
ENSMUSG00000019849.12	890.895	0.303953	0.120208	0.00671138	0.0297056	Prep	Up regulation
ENSMUSG00000019854.18	758.233	0.412825	0.170264	0.00547462	0.0251844	Reps1	Up regulation
ENSMUSG00000019857.8	295.876	0.418398	0.13836	0.000892712	0.00560845	Asf1a	Up regulation
ENSMUSG00000019866.16	251.643	0.619469	0.323329	0.00753554	0.0326031	Crybg1	Up regulation
ENSMUSG00000019878.9	1248.56	0.93545	0.181365	1.11054e-08	2.82236e-07	Hsf2	Up regulation
ENSMUSG00000019893.14	32.3807	1.07512	0.599632	0.00242159	0.012903	Ros1	Up regulation
ENSMUSG00000019894.15	8.70885	1.94976	0.503644	1.24224e-06	1.86271e-05	Slc6a15	Up regulation
ENSMUSG00000019923.15	961.226	0.648302	0.110283	4.06088e-10	1.4037e-08	Zwint	Up regulation
ENSMUSG00000019943.11	3315.77	0.346736	0.116953	0.00152001	0.00875296	Atp2b1	Up regulation
ENSMUSG00000019947.11	1557.29	0.847853	0.160501	6.25619e-09	1.68804e-07	Arid5b	Up regulation
ENSMUSG00000019951.11	1087.98	0.653807	0.235381	0.000602107	0.00403608	Bltp3b	Up regulation
ENSMUSG00000019996.18	171.672	0.601376	0.194129	0.00026656	0.0020208	Map7	Up regulation
ENSMUSG00000020029.7	11984.9	0.811403	0.289154	0.000319574	0.00234958	Nudt4	Up regulation
ENSMUSG00000020034.8	1105.62	0.719783	0.109119	2.89171e-12	1.49036e-10	Tcp11l2	Up regulation
ENSMUSG00000020038.11	427.785	0.871788	0.101962	5.66412e-19	8.60314e-17	Cry1	Up regulation
ENSMUSG00000020042.16	77.5013	0.548247	0.244426	0.00452326	0.0215847	Abtb3	Up regulation
ENSMUSG00000020061.19	117375	0.830485	0.351021	0.00115507	0.00693765	Mybpc1	Up regulation
ENSMUSG00000020063.17	423.392	0.494305	0.0872366	3.57593e-09	1.02251e-07	Sirt1	Up regulation
ENSMUSG00000020067.9	16418	0.890896	0.174512	1.53036e-08	3.77415e-07	Mypn	Up regulation
ENSMUSG00000020074.8	2064.26	0.275757	0.110818	0.00831507	0.0353072	Ccar1	Up regulation
ENSMUSG00000020075.9	2051.55	0.3642	0.116917	0.000859025	0.00543117	Ddx21	Up regulation
ENSMUSG00000020076.8	1773.48	0.277992	0.0678997	2.82715e-05	0.000291416	Ddx50	Up regulation
ENSMUSG00000020088.11	2105.33	0.498289	0.134847	5.18897e-05	0.00048953	Sar1a	Up regulation
ENSMUSG00000020091.17	3640.1	0.499733	0.177302	0.0011179	0.00674741	Eif4ebp2	Up regulation
ENSMUSG00000020107.11	651.699	0.508462	0.126499	1.30323e-05	0.000149715	Anapc16	Up regulation
ENSMUSG00000020108.5	350.653	0.576363	0.290329	0.0076115	0.0328822	Ddit4	Up regulation
ENSMUSG00000020109.14	2030.56	0.644116	0.209906	0.000241054	0.00185466	Dnajb12	Up regulation
ENSMUSG00000020111.17	1877.26	0.562793	0.264878	0.00573068	0.0261203	Micu1	Up regulation
ENSMUSG00000020130.10	974.788	0.331697	0.142664	0.0103887	0.0422369	Tbc1d15	Up regulation
ENSMUSG00000020132.11	1665.43	0.264256	0.0966361	0.00424207	0.0205121	Rab21	Up regulation
ENSMUSG00000020160.19	220.381	0.338265	0.143992	0.00948338	0.0391793	Meis1	Up regulation
ENSMUSG00000020173.18	1303.91	0.491811	0.17868	0.00142724	0.00830733	Cobl	Up regulation
ENSMUSG00000020184.16	1611.59	0.4247	0.134807	0.000567465	0.00383875	Mdm2	Up regulation
ENSMUSG00000020190.14	7412.47	1.52555	0.218058	1.68889e-13	1.0848e-11	Mknk2	Up regulation
ENSMUSG00000020212.15	92.6416	0.528131	0.160702	0.000202519	0.00159679	Mdm1	Up regulation
ENSMUSG00000020216.14	8218.83	0.418171	0.185617	0.0083475	0.03541	Jsrp1	Up regulation
ENSMUSG00000020220.17	6061.38	0.425819	0.146248	0.00123301	0.00733923	Vps13d	Up regulation
ENSMUSG00000020224.16	229.129	0.447286	0.105139	6.64651e-06	8.31087e-05	Llph	Up regulation
ENSMUSG00000020250.12	2284.37	0.393243	0.154457	0.00431844	0.020784	Txnrd1	Up regulation
ENSMUSG00000020255.9	1422.94	0.630655	0.173563	3.22717e-05	0.000326907	Nopchap1	Up regulation
ENSMUSG00000020267.7	1415.35	0.440941	0.132551	0.000282615	0.00211335	Hint1	Up regulation
ENSMUSG00000020271.18	1375.65	0.480664	0.106564	1.70303e-06	2.47601e-05	Fbxw11	Up regulation
ENSMUSG00000020275.10	309.896	0.392698	0.123049	0.000579779	0.00390772	Rel	Up regulation
ENSMUSG00000020283.6	528.083	0.493885	0.18333	0.00168333	0.00955491	Pex13	Up regulation
ENSMUSG00000020284.17	106.601	0.348023	0.129831	0.00362018	0.0179521	Cfap410	Up regulation
ENSMUSG00000020289.16	368.105	0.28232	0.106669	0.00518155	0.0241634	Nprl3	Up regulation
ENSMUSG00000020300.15	4019.08	0.452858	0.204192	0.00767351	0.0331168	Cpeb4	Up regulation
ENSMUSG00000020303.3	221.899	1.32275	0.178121	7.78584e-15	6.40249e-13	Stc2	Up regulation
ENSMUSG00000020311.18	950.215	0.413479	0.18607	0.00922803	0.0383267	Erlec1	Up regulation
ENSMUSG00000020334.7	130.597	0.732487	0.489404	0.0123704	0.0486991	Slc22a4	Up regulation
ENSMUSG00000020354.16	1546.69	0.485385	0.182071	0.00191232	0.0105984	Sgcd	Up regulation
ENSMUSG00000020359.14	598.785	0.546413	0.136759	1.16026e-05	0.000135134	Phykpl	Up regulation
ENSMUSG00000020368.16	5247.93	0.447917	0.206016	0.0087663	0.0367638	Canx	Up regulation
ENSMUSG00000020372.16	4669.13	0.816145	0.148737	2.12548e-09	6.33009e-08	Rack1	Up regulation
ENSMUSG00000020375.10	1235.63	0.300326	0.103867	0.00231205	0.0124219	Rufy1	Up regulation
ENSMUSG00000020385.17	1146.08	0.461045	0.195898	0.00519099	0.0241987	Clk4	Up regulation
ENSMUSG00000020387.16	495.074	0.883502	0.200138	4.82422e-07	8.06775e-06	Jade2	Up regulation
ENSMUSG00000020393.17	4406.67	0.891371	0.447791	0.00264166	0.013847	Kremen1	Up regulation
ENSMUSG00000020409.11	1649.19	0.38926	0.0960815	2.17055e-05	0.000231021	Slu7	Up regulation
ENSMUSG00000020412.17	760.722	0.251863	0.106074	0.0122568	0.0483845	Ascc2	Up regulation
ENSMUSG00000020427.12	830.842	0.736703	0.216837	5.10253e-05	0.000482433	Igfbp3	Up regulation
ENSMUSG00000020430.13	766.315	0.401364	0.122874	0.000428432	0.00303084	Pes1	Up regulation
ENSMUSG00000020435.18	54.2146	1.18803	0.453939	0.000269049	0.00203594	Osbp2	Up regulation
ENSMUSG00000020448.17	403.77	0.407015	0.129032	0.000612738	0.00409758	Rnf185	Up regulation
ENSMUSG00000020453.18	452.637	0.597797	0.0937509	2.35369e-11	1.03358e-09	Patz1	Up regulation
ENSMUSG00000020454.18	1126.28	0.40734	0.1151	0.000154653	0.00127297	Eif4enif1	Up regulation
ENSMUSG00000020457.14	978.619	0.566645	0.129634	1.9709e-06	2.83513e-05	Drg1	Up regulation
ENSMUSG00000020458.17	11498.9	0.725201	0.226142	0.000106912	0.000926991	Rtn4	Up regulation
ENSMUSG00000020460.16	2592.7	0.474354	0.179851	0.00220151	0.0119222	Rps27a	Up regulation
ENSMUSG00000020463.16	1000.31	0.25237	0.0988651	0.00749083	0.0324607	Ppp4r3b	Up regulation
ENSMUSG00000020471.12	393.908	0.778104	0.134632	4.2687e-10	1.46767e-08	Pold2	Up regulation
ENSMUSG00000020472.15	815.36	0.50118	0.124682	1.35786e-05	0.000154933	Zkscan17	Up regulation
ENSMUSG00000020495.14	276.726	0.265138	0.111964	0.0119461	0.047368	Smg8	Up regulation
ENSMUSG00000020521.8	594.415	0.324247	0.137574	0.00986258	0.0404546	Rnft1	Up regulation
ENSMUSG00000020530.15	1330.68	0.435894	0.0828333	4.85844e-08	1.07039e-06	Ggnbp2	Up regulation
ENSMUSG00000020532.19	747.061	0.295961	0.123583	0.00997512	0.040806	Acaca	Up regulation
ENSMUSG00000020541.13	274.338	0.628298	0.268698	0.0024608	0.0130661	Tom1l1	Up regulation
ENSMUSG00000020547.6	2366.3	0.451886	0.191824	0.00540499	0.0249263	Bzw2	Up regulation
ENSMUSG00000020549.15	852.578	0.393945	0.0994764	3.11452e-05	0.000316864	Elac2	Up regulation
ENSMUSG00000020572.9	2899.26	0.502139	0.214548	0.00437128	0.0209875	Nampt	Up regulation
ENSMUSG00000020590.17	2006.32	0.466374	0.150882	0.000555893	0.00377531	Snx13	Up regulation
ENSMUSG00000020594.15	3138.95	0.299763	0.111517	0.00430931	0.0207619	Pum2	Up regulation
ENSMUSG00000020598.17	99.7902	1.7867	0.717632	8.59216e-05	0.00076688	Nrcam	Up regulation
ENSMUSG00000020604.14	67.9261	0.741121	0.449599	0.00894286	0.0373526	Arsg	Up regulation
ENSMUSG00000020610.18	950.155	0.479699	0.177075	0.00173348	0.00978005	Amz2	Up regulation
ENSMUSG00000020611.15	1366.26	0.501948	0.123199	1.07114e-05	0.000126004	Gna13	Up regulation
ENSMUSG00000020634.13	4004.18	0.585576	0.225614	0.0014252	0.00830138	Ubxn2a	Up regulation
ENSMUSG00000020650.16	608.193	0.656818	0.212873	0.000215083	0.00168089	Bcap29	Up regulation
ENSMUSG00000020659.18	267.744	0.465326	0.161869	0.00112615	0.00678765	Cbll1	Up regulation
ENSMUSG00000020687.14	978.16	0.340048	0.118957	0.00218786	0.0118682	Cdc27	Up regulation
ENSMUSG00000020694.18	1750.05	0.485512	0.10196	4.9255e-07	8.19468e-06	Tlk2	Up regulation
ENSMUSG00000020697.18	976.664	0.302466	0.12064	0.00716453	0.031318	Lig3	Up regulation
ENSMUSG00000020704.14	4.42192	1.70018	0.738672	0.000156519	0.00128549	Asic2	Up regulation
ENSMUSG00000020705.7	1457.22	0.374345	0.0780019	7.3743e-07	1.17104e-05	Ddx42	Up regulation
ENSMUSG00000020706.14	981.315	0.299776	0.110504	0.00400426	0.0195748	Ftsj3	Up regulation
ENSMUSG00000020708.13	1729.09	0.325835	0.119762	0.00353253	0.017619	Psmc5	Up regulation
ENSMUSG00000020715.10	657.401	0.374715	0.101404	9.95082e-05	0.000871279	Ern1	Up regulation
ENSMUSG00000020718.13	95.2925	0.335911	0.142242	0.00927431	0.0384817	Polg2	Up regulation
ENSMUSG00000020720.14	2125.38	0.44401	0.149694	0.000942858	0.00586357	Psmd12	Up regulation
ENSMUSG00000020773.12	517.997	0.565997	0.307706	0.0111647	0.0447852	Trim47	Up regulation
ENSMUSG00000020777.17	4070.58	0.598266	0.215037	0.000760772	0.00491958	Acox1	Up regulation
ENSMUSG00000020780.16	2076.71	0.464039	0.116738	2.02305e-05	0.000217655	Srp68	Up regulation
ENSMUSG00000020782.19	256.673	0.609155	0.148072	4.9232e-06	6.41058e-05	Llgl2	Up regulation
ENSMUSG00000020794.14	2323.88	0.373743	0.160625	0.00856413	0.0361229	Ube2g1	Up regulation
ENSMUSG00000020798.15	9.5558	0.705559	0.428761	0.0101352	0.0413661	Spns3	Up regulation
ENSMUSG00000020806.16	573.381	0.695335	0.189461	2.08337e-05	0.00022266	Rhbdf2	Up regulation
ENSMUSG00000020817.17	2581.17	0.477637	0.0862583	8.30243e-09	2.18085e-07	Rabep1	Up regulation
ENSMUSG00000020818.17	375.385	0.258516	0.0947934	0.0044165	0.021181	Mfsd11	Up regulation
ENSMUSG00000020821.18	25895.2	0.727839	0.1933	1.24836e-05	0.000144418	Kif1c	Up regulation
ENSMUSG00000020844.7	1204.89	0.550508	0.18639	0.000557857	0.00378466	Nxn	Up regulation
ENSMUSG00000020847.16	245.226	0.625381	0.263174	0.00224167	0.0121016	Rph3al	Up regulation
ENSMUSG00000020848.8	32.037	0.792378	0.40713	0.00388946	0.0191113	Doc2b	Up regulation
ENSMUSG00000020849.14	9301.07	0.425355	0.159431	0.00259468	0.0136367	Ywhae	Up regulation
ENSMUSG00000020859.18	11125	0.625806	0.119897	2.016e-08	4.88323e-07	Spag9	Up regulation
ENSMUSG00000020873.16	625.707	0.511622	0.154423	0.000201608	0.00159099	Slc35b1	Up regulation
ENSMUSG00000020882.19	5376.1	0.664977	0.200544	9.17031e-05	0.000812582	Cacnb1	Up regulation
ENSMUSG00000020892.11	3.44123	0.837588	0.705476	0.0116533	0.0464207	Aloxe3	Up regulation
ENSMUSG00000020899.17	591.059	0.6504	0.175171	2.14196e-05	0.000228355	Pfas	Up regulation
ENSMUSG00000020900.16	6943.98	0.849379	0.610445	0.00959934	0.0395634	Myh10	Up regulation
ENSMUSG00000020903.14	390.937	0.277466	0.0903811	0.00140582	0.008207	Stx8	Up regulation
ENSMUSG00000020908.16	25122.8	1.94333	1.05927	0.000110638	0.000954166	Myh3	Up regulation
ENSMUSG00000020936.9	1771.64	0.389264	0.0716528	2.41282e-08	5.75798e-07	Nmt1	Up regulation
ENSMUSG00000020941.8	315.403	0.491408	0.206764	0.00418695	0.020295	Map3k14	Up regulation
ENSMUSG00000020946.14	1179.92	0.31915	0.126636	0.00647069	0.0288019	Gosr2	Up regulation
ENSMUSG00000020954.17	6853.5	0.308329	0.0888076	0.000307458	0.00227606	Strn3	Up regulation
ENSMUSG00000020955.10	613.929	0.655489	0.142901	4.40671e-07	7.42726e-06	Ap4s1	Up regulation
ENSMUSG00000020956.15	152.881	0.533455	0.117481	1.08355e-06	1.64967e-05	Dtd2	Up regulation
ENSMUSG00000020962.15	1117.2	0.497444	0.104273	4.39641e-07	7.41474e-06	Gtf2a1	Up regulation
ENSMUSG00000020964.16	2715.33	0.404359	0.0980309	1.47041e-05	0.000166451	Sel1l	Up regulation
ENSMUSG00000020988.10	609.135	0.513605	0.214933	0.00361879	0.0179487	L2hgdh	Up regulation
ENSMUSG00000021000.18	2466.08	0.659401	0.178509	2.21632e-05	0.000235118	Mia2	Up regulation
ENSMUSG00000021003.11	167.763	0.284063	0.121811	0.0123064	0.048543	Galc	Up regulation
ENSMUSG00000021009.16	1947.72	0.518474	0.197343	0.0018054	0.0101166	Ptpn21	Up regulation
ENSMUSG00000021012.17	1632.55	0.398912	0.113238	0.000171433	0.00138331	Zc3h14	Up regulation
ENSMUSG00000021013.17	106.126	0.486875	0.178562	0.00158358	0.00907113	Ttc8	Up regulation
ENSMUSG00000021024.15	1549.32	0.50696	0.136151	4.41958e-05	0.000427525	Psma6	Up regulation
ENSMUSG00000021033.12	579.73	0.432247	0.155643	0.00180886	0.0101272	Gstz1	Up regulation
ENSMUSG00000021039.10	1857.88	0.620228	0.101464	1.11795e-10	4.35392e-09	Snw1	Up regulation
ENSMUSG00000021056.9	1.76419	1.16527	0.994742	0.00188975	0.0104981	Tex21	Up regulation
ENSMUSG00000021061.16	17549.4	1.32494	0.180946	1.68252e-14	1.29299e-12	Sptb	Up regulation
ENSMUSG00000021067.9	1304.14	0.498989	0.217621	0.00503245	0.0235788	Sav1	Up regulation
ENSMUSG00000021071.18	10.9248	1.61989	0.642086	0.000127598	0.00107776	Trim9	Up regulation
ENSMUSG00000021091.9	141.852	3.63362	0.318001	2.0217e-33	1.33852e-30	Serpina3n	Up regulation
ENSMUSG00000021094.11	629.632	0.654114	0.162055	5.48392e-06	7.04129e-05	Dhrs7	Up regulation
ENSMUSG00000021096.12	5112.09	0.621101	0.128868	1.67394e-07	3.17582e-06	Ppm1a	Up regulation
ENSMUSG00000021103.13	544.964	0.484924	0.104355	8.67285e-07	1.34742e-05	Mnat1	Up regulation
ENSMUSG00000021112.10	1679.72	0.57565	0.163059	6.38377e-05	0.000584937	Pals1	Up regulation
ENSMUSG00000021114.10	1554.95	0.448916	0.145886	0.000638992	0.00424695	Atp6v1d	Up regulation
ENSMUSG00000021133.10	1876.24	0.437198	0.130779	0.000271843	0.00205302	Susd6	Up regulation
ENSMUSG00000021136.14	27.1121	0.791496	0.323779	0.0010269	0.00629075	Smoc1	Up regulation
ENSMUSG00000021140.10	4253.61	0.380882	0.118352	0.000559613	0.00379359	Pcnx	Up regulation
ENSMUSG00000021143.11	1536.94	0.262064	0.0981538	0.00517774	0.02415	Pacs2	Up regulation
ENSMUSG00000021144.15	1309.6	0.472681	0.143525	0.000267873	0.00202956	Mta1	Up regulation
ENSMUSG00000021149.9	1544.89	0.42653	0.129817	0.000352421	0.00256407	Gtpbp4	Up regulation
ENSMUSG00000021156.18	2996.93	0.473175	0.0934738	1.14617e-07	2.26264e-06	Zmynd11	Up regulation
ENSMUSG00000021178.10	2867.27	0.609043	0.157793	1.44881e-05	0.000164366	Psmc1	Up regulation
ENSMUSG00000021180.10	573.055	1.01503	0.253227	2.55817e-06	3.57631e-05	Rps6ka5	Up regulation
ENSMUSG00000021192.17	1199.29	0.392295	0.0913745	7.42903e-06	9.15633e-05	Golga5	Up regulation
ENSMUSG00000021193.11	1173.3	0.600908	0.105095	1.38582e-09	4.31643e-08	Pitrm1	Up regulation
ENSMUSG00000021200.15	7829.79	0.725446	0.18343	5.71767e-06	7.30509e-05	Asb2	Up regulation
ENSMUSG00000021215.16	1379.81	0.849946	0.194419	6.24285e-07	1.01e-05	Net1	Up regulation
ENSMUSG00000021218.11	3141.48	0.414065	0.101264	1.63325e-05	0.000181312	Gdi2	Up regulation
ENSMUSG00000021238.12	2955.36	1.0075	0.18446	2.08058e-09	6.21789e-08	Aldh6a1	Up regulation
ENSMUSG00000021254.10	790.773	0.192253	0.0702666	0.00511506	0.0239008	Gpatch2l	Up regulation
ENSMUSG00000021258.11	1815.09	0.753902	0.380619	0.00402075	0.0196442	Ccnk	Up regulation
ENSMUSG00000021271.6	346.273	0.30773	0.0862659	0.00021555	0.00168352	Zfp839	Up regulation
ENSMUSG00000021273.12	1630.74	1.27422	0.271011	1.14427e-07	2.26061e-06	Fdft1	Up regulation
ENSMUSG00000021282.18	3677.56	0.909938	0.128748	7.12229e-14	4.94367e-12	Eif5	Up regulation
ENSMUSG00000021286.9	301.546	0.574498	0.133334	2.50549e-06	3.50837e-05	Zfyve21	Up regulation
ENSMUSG00000021356.11	66.6447	0.618962	0.254836	0.00198705	0.0109538	Irf4	Up regulation
ENSMUSG00000021367.9	52.251	0.91919	0.250671	1.14415e-05	0.000133575	Edn1	Up regulation
ENSMUSG00000021371.6	1483.35	0.354062	0.118329	0.00134745	0.00793082	Mcur1	Up regulation
ENSMUSG00000021375.12	6030.22	0.658622	0.219603	0.000286294	0.00213715	Kif13a	Up regulation
ENSMUSG00000021377.16	2007.2	0.596284	0.115472	3.21501e-08	7.41866e-07	Dek	Up regulation
ENSMUSG00000021395.12	620.024	0.324805	0.11096	0.00187834	0.0104437	Spin1	Up regulation
ENSMUSG00000021451.17	1668.43	0.557874	0.250868	0.00454879	0.0216825	Sema4d	Up regulation
ENSMUSG00000021456.9	1020.64	1.16246	0.634959	0.00174207	0.00981711	Fbp2	Up regulation
ENSMUSG00000021460.18	1476.44	0.255339	0.0760762	0.000558998	0.00379041	Auh	Up regulation
ENSMUSG00000021477.10	2064.46	0.392408	0.106119	9.05616e-05	0.000803571	Ctsl	Up regulation
ENSMUSG00000021481.12	409.855	0.436869	0.186352	0.00600803	0.0272021	Zfp346	Up regulation
ENSMUSG00000021488.9	5902.24	0.251652	0.0756666	0.000630452	0.00419884	Nsd1	Up regulation
ENSMUSG00000021500.19	2451.13	0.452345	0.0962789	8.13376e-07	1.27906e-05	Ddx46	Up regulation
ENSMUSG00000021536.8	1320.46	0.587344	0.123972	3.0442e-07	5.39865e-06	Adcy2	Up regulation
ENSMUSG00000021546.19	4989.97	0.251907	0.103228	0.0102575	0.041776	Hnrnpk	Up regulation
ENSMUSG00000021552.8	555.714	0.551527	0.0729122	6.71203e-15	5.59069e-13	Gkap1	Up regulation
ENSMUSG00000021565.17	14.709	3.22631	0.510086	2.25442e-13	1.40269e-11	Slc6a19	Up regulation
ENSMUSG00000021585.11	3362.66	0.386275	0.13811	0.00214387	0.0116811	Cast	Up regulation
ENSMUSG00000021595.19	1466.9	0.63997	0.102837	4.97074e-11	2.06453e-09	Nsun2	Up regulation
ENSMUSG00000021597.17	328.193	0.331362	0.130286	0.0057672	0.0262498	Slf1	Up regulation
ENSMUSG00000021646.10	800.564	0.463712	0.160595	0.00109117	0.00661544	Mccc2	Up regulation
ENSMUSG00000021660.15	1293.73	0.73897	0.110585	1.49172e-12	8.02454e-11	Btf3	Up regulation
ENSMUSG00000021661.17	264.58	0.365844	0.102606	0.000170756	0.00137913	Ankra2	Up regulation
ENSMUSG00000021669.17	2059.81	0.498476	0.140771	9.38789e-05	0.000829017	Cert1	Up regulation
ENSMUSG00000021671.10	314.348	0.264258	0.0824067	0.000922437	0.0057532	Poc5	Up regulation
ENSMUSG00000021686.7	1167.24	0.288705	0.0710439	3.11029e-05	0.000316558	Ap3b1	Up regulation
ENSMUSG00000021690.11	2791.82	0.806132	0.13	2.93159e-11	1.26173e-09	Jmy	Up regulation
ENSMUSG00000021699.18	5695.9	0.620972	0.286551	0.0040125	0.0196114	Pde4d	Up regulation
ENSMUSG00000021709.15	4286.66	0.760698	0.207809	1.69867e-05	0.000187763	Erbin	Up regulation
ENSMUSG00000021712.16	824.57	0.571791	0.199228	0.000655225	0.00433809	Trim23	Up regulation
ENSMUSG00000021731.11	1039.2	0.389059	0.109146	0.000153707	0.00126558	Mrps30	Up regulation
ENSMUSG00000021750.17	78.0159	1.56716	0.326406	6.01796e-08	1.28847e-06	Fam107a	Up regulation
ENSMUSG00000021751.14	6.87495	0.824754	0.652816	0.0119981	0.0475303	Acox2	Up regulation
ENSMUSG00000021756.13	6044.93	0.472764	0.0747855	7.22987e-11	2.91234e-09	Il6st	Up regulation
ENSMUSG00000021765.10	268.215	0.830752	0.440257	0.00400094	0.0195623	Fst	Up regulation
ENSMUSG00000021785.9	1222.73	0.592124	0.147409	8.20311e-06	9.98645e-05	Ngly1	Up regulation
ENSMUSG00000021792.16	1076.09	1.1879	0.500458	0.000509476	0.00351461	Prxl2a	Up regulation
ENSMUSG00000021807.7	1922.22	0.706733	0.210917	6.78752e-05	0.000619076	Rtraf	Up regulation
ENSMUSG00000021811.8	307.984	0.46459	0.151333	0.000601902	0.00403576	Dnajc9	Up regulation
ENSMUSG00000021814.18	1261.96	0.856392	0.332004	0.000578142	0.00389872	Anxa7	Up regulation
ENSMUSG00000021830.15	684.941	0.493623	0.180882	0.0015178	0.00874214	Txndc16	Up regulation
ENSMUSG00000021843.18	14005.5	0.910491	0.184574	3.67977e-08	8.38616e-07	Ktn1	Up regulation
ENSMUSG00000021846.11	532.365	0.372469	0.135732	0.00268383	0.0140253	Peli2	Up regulation
ENSMUSG00000021866.16	2604.06	0.961944	0.161715	1.20381e-10	4.63629e-09	Anxa11	Up regulation
ENSMUSG00000021870.18	4385.95	0.479268	0.230037	0.00937375	0.0388009	Slmap	Up regulation
ENSMUSG00000021901.11	1415.59	0.374062	0.121914	0.000959214	0.00593954	Bap1	Up regulation
ENSMUSG00000021902.8	186.235	0.797864	0.264498	0.000164826	0.00134173	Phf7	Up regulation
ENSMUSG00000021903.12	950.722	0.941499	0.16546	5.63899e-10	1.90249e-08	Galnt15	Up regulation
ENSMUSG00000021917.17	599.182	0.404499	0.119976	0.000290557	0.00216397	Spcs1	Up regulation
ENSMUSG00000021922.18	8.90187	0.814604	0.495491	0.00711457	0.0311629	Itih4	Up regulation
ENSMUSG00000021930.15	971.717	0.526967	0.163575	0.000256059	0.00195346	Spryd7	Up regulation
ENSMUSG00000021938.13	614.263	0.284835	0.0752651	0.000100125	0.000876085	Pspc1	Up regulation
ENSMUSG00000021950.16	59.5045	3.18919	0.347005	5.13334e-23	1.32548e-20	Anxa8	Up regulation
ENSMUSG00000021952.18	2843.92	0.870722	0.685705	0.00981118	0.0403014	Xpo4	Up regulation
ENSMUSG00000021991.10	49.6012	1.07408	0.571322	0.00205924	0.0112891	Cacna2d3	Up regulation
ENSMUSG00000021996.17	1239.52	0.478907	0.193853	0.00345529	0.0173039	Esd	Up regulation
ENSMUSG00000022009.2	247.792	0.417414	0.109622	5.16476e-05	0.000487603	Nufip1	Up regulation
ENSMUSG00000022010.20	3672.58	0.714678	0.131239	3.73338e-09	1.0605e-07	Tsc22d1	Up regulation
ENSMUSG00000022015.9	1.78654	0.854917	0.939805	0.00500453	0.0234821	Tnfsf11	Up regulation
ENSMUSG00000022016.18	1640.14	0.292702	0.11802	0.00800986	0.0342705	Akap11	Up regulation
ENSMUSG00000022018.8	1568.87	1.45419	0.437443	2.1598e-05	0.000229972	Rgcc	Up regulation
ENSMUSG00000022024.11	1861.49	0.663228	0.170658	9.92698e-06	0.000117905	Sugt1	Up regulation
ENSMUSG00000022051.16	1344.27	0.515228	0.108229	4.15965e-07	7.07551e-06	Bnip3l	Up regulation
ENSMUSG00000022064.11	865.598	0.380893	0.150751	0.00483724	0.0228216	Pibf1	Up regulation
ENSMUSG00000022091.7	1442.87	0.769962	0.204877	1.1121e-05	0.000130229	Sorbs3	Up regulation
ENSMUSG00000022092.12	448.184	0.511411	0.0993108	5.76001e-08	1.24252e-06	Ppp3cc	Up regulation
ENSMUSG00000022100.15	1182.42	0.35861	0.128264	0.00244613	0.0129989	Xpo7	Up regulation
ENSMUSG00000022105.7	882.236	1.14907	0.111363	3.76178e-26	1.33059e-23	Rb1	Up regulation
ENSMUSG00000022124.16	1854.48	0.412724	0.0872947	8.69958e-07	1.35076e-05	Fbxl3	Up regulation
ENSMUSG00000022125.8	217.357	0.309424	0.120806	0.00599173	0.0271378	Cln5	Up regulation
ENSMUSG00000022139.18	8935.42	0.560369	0.148901	2.79068e-05	0.000288348	Mbnl2	Up regulation
ENSMUSG00000022141.8	4102.38	0.407618	0.0732067	1.02369e-08	2.6275e-07	Nipbl	Up regulation
ENSMUSG00000022144.5	43.3372	2.22704	0.34942	1.79006e-12	9.53014e-11	Gdnf	Up regulation
ENSMUSG00000022151.17	929.302	0.680246	0.119536	1.05999e-09	3.379e-08	Ttc33	Up regulation
ENSMUSG00000022191.17	1703.89	0.610391	0.116536	1.9903e-08	4.82549e-07	Drosha	Up regulation
ENSMUSG00000022195.8	934.447	0.530357	0.158921	0.000166814	0.00135492	6030458C11Rik	Up regulation
ENSMUSG00000022201.17	2774.89	0.556867	0.0847882	8.51968e-12	4.01435e-10	Zfr	Up regulation
ENSMUSG00000022214.16	3552.02	0.441237	0.0976918	2.06602e-06	2.9637e-05	Dcaf11	Up regulation
ENSMUSG00000022253.18	942.585	0.783413	0.155627	2.77052e-08	6.50935e-07	Nadk2	Up regulation
ENSMUSG00000022255.17	5695.82	0.641356	0.197158	0.000127989	0.00108044	Mtdh	Up regulation
ENSMUSG00000022262.9	9.15858	0.84121	0.634586	0.0106498	0.043136	Dnah5	Up regulation
ENSMUSG00000022265.8	3452.24	0.496464	0.162157	0.000521076	0.00357838	Ank	Up regulation
ENSMUSG00000022270.17	7424.87	1.6379	0.268032	4.75285e-11	1.97941e-09	Retreg1	Up regulation
ENSMUSG00000022295.9	605.489	0.42271	0.125707	0.000273354	0.0020596	Atp6v1c1	Up regulation
ENSMUSG00000022312.12	2175.55	0.759485	0.148204	1.84538e-08	4.49948e-07	Eif3h	Up regulation
ENSMUSG00000022314.11	2765.36	0.281944	0.101807	0.00360068	0.0178898	Rad21	Up regulation
ENSMUSG00000022336.4	2526.97	0.915227	0.202949	2.95682e-07	5.25089e-06	Eif3e	Up regulation
ENSMUSG00000022338.9	461.843	0.524355	0.17445	0.000539535	0.00368554	Eny2	Up regulation
ENSMUSG00000022350.8	1006.76	0.459233	0.0808882	4.11581e-09	1.1539e-07	Washc5	Up regulation
ENSMUSG00000022357.3	1366.54	1.96608	0.199589	1.73499e-24	5.53075e-22	Klhl38	Up regulation
ENSMUSG00000022358.8	11115.9	1.8935	0.147808	4.85542e-39	4.6434e-36	Fbxo32	Up regulation
ENSMUSG00000022364.15	166.034	0.545873	0.211685	0.00181262	0.0101416	Tbc1d31	Up regulation
ENSMUSG00000022365.7	1154.25	0.304262	0.122286	0.00750093	0.0324926	Derl1	Up regulation
ENSMUSG00000022378.15	993.408	0.361798	0.146769	0.00626558	0.0281373	Cyrib	Up regulation
ENSMUSG00000022383.14	500.686	0.705228	0.28918	0.00137795	0.00807343	Ppara	Up regulation
ENSMUSG00000022386.13	266.929	0.286618	0.121734	0.0114937	0.0458771	Trmu	Up regulation
ENSMUSG00000022387.18	1803.49	0.34255	0.101132	0.000365959	0.00264207	Brd1	Up regulation
ENSMUSG00000022389.16	5213.15	0.500851	0.192562	0.00213375	0.0116382	Tef	Up regulation
ENSMUSG00000022412.15	661.002	0.321374	0.104119	0.0011337	0.00682677	Mief1	Up regulation
ENSMUSG00000022426.7	494.161	0.249675	0.105068	0.0122767	0.0484482	Josd1	Up regulation
ENSMUSG00000022433.22	1456.24	0.619746	0.175086	4.90344e-05	0.00046617	Csnk1e	Up regulation
ENSMUSG00000022441.18	571.068	1.37827	0.359247	4.11193e-06	5.46445e-05	Efcab6	Up regulation
ENSMUSG00000022449.15	1164.5	0.545843	0.291488	0.0112848	0.0452111	Adamts20	Up regulation
ENSMUSG00000022462.8	4078.05	1.00136	0.144228	1.77816e-13	1.13368e-11	Slc38a2	Up regulation
ENSMUSG00000022477.14	33359	0.342608	0.13822	0.00657631	0.0292065	Aco2	Up regulation
ENSMUSG00000022490.8	1524.6	1.4574	0.320323	2.12037e-07	3.92474e-06	Ppp1r1a	Up regulation
ENSMUSG00000022508.6	2119.73	0.663254	0.203857	0.000115806	0.000991976	Bcl6	Up regulation
ENSMUSG00000022510.15	588.205	2.29265	0.292608	3.92035e-17	4.58043e-15	Trp63	Up regulation
ENSMUSG00000022521.11	4717.27	0.459781	0.116791	2.42964e-05	0.000254403	Crebbp	Up regulation
ENSMUSG00000022526.9	360.868	0.466691	0.135987	0.0001681	0.00136194	Zfp251	Up regulation
ENSMUSG00000022533.15	2307.4	0.975284	0.220701	4.28755e-07	7.25483e-06	Atp13a3	Up regulation
ENSMUSG00000022536.15	1470.53	0.193307	0.0621842	0.00155002	0.00890588	Glyr1	Up regulation
ENSMUSG00000022538.21	578.944	0.413395	0.09507	5.21375e-06	6.7447e-05	Lsg1	Up regulation
ENSMUSG00000022548.15	826.183	2.13593	0.197112	3.31852e-29	1.45505e-26	Apod	Up regulation
ENSMUSG00000022553.17	1055.72	0.77595	0.203328	8.59969e-06	0.000103811	Maf1	Up regulation
ENSMUSG00000022557.12	530.349	0.442972	0.175759	0.00361684	0.0179425	Bop1	Up regulation
ENSMUSG00000022558.17	654.76	0.429698	0.116308	7.59033e-05	0.00068528	Mroh1	Up regulation
ENSMUSG00000022564.8	1379.81	0.444046	0.202822	0.00860764	0.0362515	Grina	Up regulation
ENSMUSG00000022565.16	134276	0.543464	0.194115	0.000943633	0.00586697	Plec	Up regulation
ENSMUSG00000022610.11	2454.78	0.671828	0.161372	2.89817e-06	3.99106e-05	Mapk12	Up regulation
ENSMUSG00000022635.10	2208.71	0.392766	0.168261	0.00767204	0.033116	Zcrb1	Up regulation
ENSMUSG00000022637.12	1173.11	0.716201	0.108917	3.37377e-12	1.70812e-10	Cblb	Up regulation
ENSMUSG00000022680.15	2297.31	0.37462	0.150263	0.00546796	0.0251656	Pdxdc1	Up regulation
ENSMUSG00000022698.18	6686.24	0.480484	0.158577	0.000630677	0.00419926	Naa50	Up regulation
ENSMUSG00000022707.18	2649.59	0.72553	0.295877	0.0012352	0.00734889	Gbe1	Up regulation
ENSMUSG00000022710.18	2998.58	0.379681	0.0836993	2.5764e-06	3.59596e-05	Usp7	Up regulation
ENSMUSG00000022723.17	4744.42	0.337043	0.141347	0.00868597	0.036504	Crybg3	Up regulation
ENSMUSG00000022759.16	58.7779	1.18467	0.243505	5.14394e-08	1.1218e-06	Lrrc74b	Up regulation
ENSMUSG00000022800.15	2066.46	0.642157	0.152551	2.72137e-06	3.77381e-05	Fyttd1	Up regulation
ENSMUSG00000022802.3	158.021	0.569408	0.111393	4.97136e-08	1.08969e-06	Lmln	Up regulation
ENSMUSG00000022812.15	4322.21	0.71724	0.140758	2.52108e-08	5.98316e-07	Gsk3b	Up regulation
ENSMUSG00000022837.15	170.352	0.661508	0.157613	2.61707e-06	3.64485e-05	Iqcb1	Up regulation
ENSMUSG00000022841.16	1311.19	0.353148	0.0783549	3.33058e-06	4.51438e-05	Ap2m1	Up regulation
ENSMUSG00000022848.9	1431.02	0.374828	0.131123	0.00187206	0.0104178	Slc49a4	Up regulation
ENSMUSG00000022867.12	4802.24	0.711426	0.257584	0.000505181	0.00349151	Usp25	Up regulation
ENSMUSG00000022897.16	3852.14	0.845942	0.137094	3.28824e-11	1.40108e-09	Dyrk1a	Up regulation
ENSMUSG00000022905.13	5666.61	0.539507	0.232541	0.00384633	0.0189294	Kpna1	Up regulation
ENSMUSG00000022940.18	691.55	0.609481	0.172078	5.1192e-05	0.000483654	Pigp	Up regulation
ENSMUSG00000022952.18	443.294	0.586474	0.227701	0.0015047	0.00867641	Runx1	Up regulation
ENSMUSG00000022962.16	1120.48	0.619106	0.118196	1.89307e-08	4.60705e-07	Gart	Up regulation
ENSMUSG00000022972.11	617.417	0.406581	0.124958	0.000436365	0.00307684	Cfap298	Up regulation
ENSMUSG00000022982.11	2155.37	0.475885	0.154625	0.000552081	0.00375435	Sod1	Up regulation
ENSMUSG00000022987.13	519.161	0.903287	0.183594	3.9612e-08	8.90959e-07	Zfp641	Up regulation
ENSMUSG00000022992.18	611.343	0.284336	0.0804364	0.000264422	0.00201146	Kansl2	Up regulation
ENSMUSG00000022995.18	3677.31	0.667682	0.406738	0.0116584	0.0464269	Enah	Up regulation
ENSMUSG00000023027.14	950.439	0.557621	0.138664	9.75119e-06	0.00011603	Atf1	Up regulation
ENSMUSG00000023043.8	42.5769	3.47861	0.619431	8.13849e-12	3.87005e-10	Krt18	Up regulation
ENSMUSG00000023055.11	2514.51	0.753113	0.10949	3.63636e-13	2.16846e-11	Calcoco1	Up regulation
ENSMUSG00000023067.15	474.8	2.42604	0.20849	1.5912e-33	1.08122e-30	Cdkn1a	Up regulation
ENSMUSG00000023074.12	851.25	0.551803	0.272367	0.0076763	0.0331233	Mospd1	Up regulation
ENSMUSG00000023078.7	21.1191	1.73916	0.832476	0.000191035	0.00151963	Cxcl13	Up regulation
ENSMUSG00000023087.17	663.91	0.505583	0.171338	0.000713257	0.00464841	Noct	Up regulation
ENSMUSG00000023088.18	2153.86	0.66846	0.0950875	1.7867e-13	1.13632e-11	Abcc1	Up regulation
ENSMUSG00000023110.13	789.816	0.311788	0.130585	0.00956482	0.0394589	Prmt5	Up regulation
ENSMUSG00000023118.16	2753.32	0.786587	0.114633	3.68406e-13	2.19184e-11	Sympk	Up regulation
ENSMUSG00000023150.15	3076.54	0.223408	0.0723978	0.00156073	0.00895746	Ivns1abp	Up regulation
ENSMUSG00000023153.10	1043.67	1.0116	0.208761	5.44138e-08	1.17871e-06	Tmem52	Up regulation
ENSMUSG00000023156.5	483.97	0.323649	0.132954	0.00804339	0.0343969	Rpp14	Up regulation
ENSMUSG00000023170.15	1455.83	0.812764	0.137355	1.69628e-10	6.26605e-09	Gps2	Up regulation
ENSMUSG00000023175.16	9524.46	0.537497	0.190397	0.000904755	0.00566344	Bsg	Up regulation
ENSMUSG00000023267.11	49.6237	2.99245	0.430724	5.78612e-15	4.85076e-13	Gabrr2	Up regulation
ENSMUSG00000023286.17	826.673	0.459379	0.117912	2.88228e-05	0.00029639	Ube2j2	Up regulation
ENSMUSG00000023307.15	1235.01	0.437687	0.146073	0.000883951	0.00556152	Marchf5	Up regulation
ENSMUSG00000023460.15	5685.07	0.901859	0.220732	2.06242e-06	2.96019e-05	Rab12	Up regulation
ENSMUSG00000023572.17	411.866	0.6393	0.125783	3.90432e-08	8.81238e-07	Ccndbp1	Up regulation
ENSMUSG00000023755.11	35.7812	0.630805	0.191159	0.000113559	0.000976425	Rhebl1	Up regulation
ENSMUSG00000023800.16	271.579	0.907804	0.38757	0.00101655	0.00623475	Tiam2	Up regulation
ENSMUSG00000023809.12	4984.48	0.411475	0.12956	0.000556739	0.00377807	Rps6ka2	Up regulation
ENSMUSG00000023826.18	497.884	0.849948	0.180022	1.168e-07	2.29694e-06	Prkn	Up regulation
ENSMUSG00000023830.15	6672.89	0.487293	0.207539	0.00461466	0.0219398	Igf2r	Up regulation
ENSMUSG00000023845.8	5938.56	0.985168	0.135919	1.94664e-14	1.48272e-12	Lnpep	Up regulation
ENSMUSG00000023883.14	1929.9	0.776843	0.169466	2.74099e-07	4.91152e-06	Phf10	Up regulation
ENSMUSG00000023892.9	269.768	0.443513	0.202211	0.00854547	0.036072	Zfp51	Up regulation
ENSMUSG00000023912.11	267.173	0.601718	0.236818	0.00155351	0.00892	Slc25a27	Up regulation
ENSMUSG00000023921.10	1460.45	0.404856	0.188893	0.0116857	0.0465141	Mmut	Up regulation
ENSMUSG00000023927.16	2409.26	0.499374	0.230989	0.00701762	0.0308167	Satb1	Up regulation
ENSMUSG00000023944.15	39152.2	0.680846	0.166036	3.66577e-06	4.92475e-05	Hsp90ab1	Up regulation
ENSMUSG00000023959.11	7519.23	0.577328	0.193268	0.000435651	0.00307265	Clic5	Up regulation
ENSMUSG00000023977.16	5170.14	0.615577	0.135709	6.92648e-07	1.10776e-05	Ubr2	Up regulation
ENSMUSG00000023980.8	431.557	0.259827	0.109752	0.0121762	0.0481253	Taf8	Up regulation
ENSMUSG00000024002.19	2613.23	0.342452	0.101484	0.000383275	0.00275057	Brd4	Up regulation
ENSMUSG00000024014.9	544.845	1.69397	0.375238	1.76723e-07	3.32834e-06	Pim1	Up regulation
ENSMUSG00000024039.16	13.999	2.4584	0.56122	4.34258e-08	9.67469e-07	Cbs	Up regulation
ENSMUSG00000024048.16	3110.48	1.27377	0.486694	0.000228395	0.00176728	Myl12a	Up regulation
ENSMUSG00000024049.16	71111.3	1.36162	0.137422	3.21986e-24	9.89762e-22	Myom1	Up regulation
ENSMUSG00000024059.11	3573.53	0.759611	0.216548	3.10307e-05	0.000316197	Clip4	Up regulation
ENSMUSG00000024065.9	116.296	0.590625	0.160217	3.21672e-05	0.000326105	Ehd3	Up regulation
ENSMUSG00000024066.10	1240.64	1.01265	0.149221	5.34832e-13	3.11034e-11	Xdh	Up regulation
ENSMUSG00000024073.17	7332.69	0.341417	0.0792568	8.75407e-06	0.000105576	Birc6	Up regulation
ENSMUSG00000024081.10	967.664	0.454493	0.131714	0.000167728	0.00135978	Cebpz	Up regulation
ENSMUSG00000024083.17	6310.4	0.78438	0.250712	0.00011619	0.000994084	Pja2	Up regulation
ENSMUSG00000024087.5	53.0072	1.69505	0.362791	8.79103e-08	1.80296e-06	Cyp1b1	Up regulation
ENSMUSG00000024096.18	1493.03	0.540876	0.0841634	2.40683e-11	1.05512e-09	Ralbp1	Up regulation
ENSMUSG00000024101.16	554.064	0.524078	0.141831	4.48741e-05	0.000433244	Washc1	Up regulation
ENSMUSG00000024104.12	1598.4	0.443368	0.0600377	5.07042e-14	3.58694e-12	Washc2	Up regulation
ENSMUSG00000024122.17	2199.99	0.972816	0.161888	8.30691e-11	3.29989e-09	Pdpk1	Up regulation
ENSMUSG00000024127.16	1994.07	0.832274	0.403153	0.00258544	0.0135964	Prepl	Up regulation
ENSMUSG00000024164.16	2310.63	0.87338	0.313297	0.000290506	0.00216397	C3	Up regulation
ENSMUSG00000024197.11	728.192	0.732841	0.176288	2.30918e-06	3.26714e-05	Plin3	Up regulation
ENSMUSG00000024201.13	1011.7	0.424015	0.118585	0.000123635	0.00104875	Kdm4b	Up regulation
ENSMUSG00000024210.4	1387.95	0.487679	0.163609	0.00071259	0.00464641	Ip6k3	Up regulation
ENSMUSG00000024218.14	324.648	0.215253	0.0865909	0.0100263	0.0409829	Taf11	Up regulation
ENSMUSG00000024220.15	463.655	0.326499	0.0930392	0.000249505	0.00190831	Zfp523	Up regulation
ENSMUSG00000024222.19	1662.84	3.43414	0.202654	2.32779e-67	1.50265e-63	Fkbp5	Up regulation
ENSMUSG00000024236.19	20590.3	0.890399	0.140244	9.90907e-12	4.61845e-10	Svil	Up regulation
ENSMUSG00000024240.14	938.279	0.328745	0.0827416	3.94074e-05	0.000386428	Epc1	Up regulation
ENSMUSG00000024277.15	1231.58	0.414083	0.0775559	3.58243e-08	8.19326e-07	Mapre2	Up regulation
ENSMUSG00000024286.9	1995.4	0.466386	0.126882	6.69482e-05	0.000611269	Ccny	Up regulation
ENSMUSG00000024335.21	3187.87	0.228871	0.0828345	0.00431656	0.0207789	Brd2	Up regulation
ENSMUSG00000024350.7	874.959	0.439569	0.108702	1.73159e-05	0.000190992	Dnajc18	Up regulation
ENSMUSG00000024353.6	18.2063	0.717156	0.377606	0.00551916	0.0253397	Mzb1	Up regulation
ENSMUSG00000024360.9	3160.39	0.637316	0.134346	2.24291e-07	4.12284e-06	Etf1	Up regulation
ENSMUSG00000024369.17	176.864	0.369584	0.138103	0.00332717	0.01675	Nelfe	Up regulation
ENSMUSG00000024382.14	437.91	0.274095	0.0959687	0.00283147	0.0146267	Ercc3	Up regulation
ENSMUSG00000024384.5	1703.45	0.203081	0.0636939	0.00115605	0.00694032	Iws1	Up regulation
ENSMUSG00000024387.14	1429.05	0.328771	0.142239	0.0108961	0.0438987	Csnk2b	Up regulation
ENSMUSG00000024392.18	5228.04	0.650849	0.134199	1.22795e-07	2.39659e-06	Bag6	Up regulation
ENSMUSG00000024400.17	1355.96	0.230266	0.0913273	0.00872631	0.0366318	Wdr33	Up regulation
ENSMUSG00000024404.8	3845.19	1.05425	0.236862	3.5963e-07	6.26586e-06	Riok3	Up regulation
ENSMUSG00000024425.5	1601.14	0.322749	0.116106	0.00299463	0.0153178	Ndfip1	Up regulation
ENSMUSG00000024454.17	765.488	0.326144	0.126117	0.00522342	0.0242797	Hdac3	Up regulation
ENSMUSG00000024456.18	5402.1	0.465468	0.225167	0.0104208	0.0423342	Diaph1	Up regulation
ENSMUSG00000024471.13	46292.8	1.10769	0.183049	7.01958e-11	2.84095e-09	Myot	Up regulation
ENSMUSG00000024474.9	2318.04	0.279138	0.115644	0.0100777	0.0411603	Ik	Up regulation
ENSMUSG00000024481.6	348.679	2.34488	0.290398	4.87582e-18	6.52324e-16	Lvrn	Up regulation
ENSMUSG00000024483.20	2343.55	0.379026	0.0704373	3.376e-08	7.75814e-07	Ankhd1	Up regulation
ENSMUSG00000024491.17	1069.14	0.314932	0.0995771	0.000899754	0.00564171	Rbm27	Up regulation
ENSMUSG00000024493.10	1679	0.325607	0.0978829	0.000487728	0.00338721	Lars1	Up regulation
ENSMUSG00000024498.17	1766.62	0.297058	0.0959439	0.00120385	0.00719719	Tcerg1	Up regulation
ENSMUSG00000024515.14	1559.96	0.541274	0.112766	2.92711e-07	5.20172e-06	Smad4	Up regulation
ENSMUSG00000024524.18	180.325	2.46164	0.927482	8.39908e-06	0.000101866	Gnal	Up regulation
ENSMUSG00000024528.9	375.39	0.396902	0.11496	0.000224698	0.00174302	Srfbp1	Up regulation
ENSMUSG00000024548.12	1327.34	1.24259	0.146249	1.36394e-18	1.95657e-16	Setbp1	Up regulation
ENSMUSG00000024561.12	858.985	0.323034	0.0814193	4.1258e-05	0.00040216	Mbd1	Up regulation
ENSMUSG00000024566.11	1011.4	0.190689	0.0688425	0.0046299	0.0220082	Atp9b	Up regulation
ENSMUSG00000024571.16	1039.02	0.587372	0.109359	1.09291e-08	2.78303e-07	Naa12	Up regulation
ENSMUSG00000024576.15	6594.95	0.670872	0.0847416	2.05931e-16	2.09344e-14	Csnk1a1	Up regulation
ENSMUSG00000024580.9	513.47	0.374399	0.138791	0.00305478	0.0155792	Grpel2	Up regulation
ENSMUSG00000024583.4	1753.53	0.629335	0.150325	3.21729e-06	4.3723e-05	Txnl1	Up regulation
ENSMUSG00000024587.11	1980.35	0.373608	0.0916457	2.09797e-05	0.000224035	Nars1	Up regulation
ENSMUSG00000024588.11	3488.64	0.377028	0.144526	0.00390665	0.0191704	Fech	Up regulation
ENSMUSG00000024597.12	3704.22	0.952105	0.209337	2.37871e-07	4.33761e-06	Slc12a2	Up regulation
ENSMUSG00000024603.9	1183.02	0.358507	0.124629	0.00190776	0.0105754	Dctn4	Up regulation
ENSMUSG00000024608.12	2968.35	0.645687	0.191057	7.91339e-05	0.000711213	Rps14	Up regulation
ENSMUSG00000024622.9	817.872	0.227412	0.085994	0.00617303	0.0278126	Hmgxb3	Up regulation
ENSMUSG00000024642.19	978.759	0.421271	0.17542	0.00558454	0.0255761	Tle4	Up regulation
ENSMUSG00000024654.9	1214.54	0.883201	0.235545	8.72488e-06	0.000105273	Asrgl1	Up regulation
ENSMUSG00000024661.8	17122.7	0.765183	0.199476	8.19909e-06	9.98627e-05	Fth1	Up regulation
ENSMUSG00000024687.12	3102.76	0.519369	0.113554	1.00656e-06	1.54246e-05	Osbp	Up regulation
ENSMUSG00000024695.17	2319.26	0.583791	0.180017	0.000175682	0.00141493	Zfp91	Up regulation
ENSMUSG00000024712.10	1175.98	0.528674	0.129094	8.38669e-06	0.000101777	Rfk	Up regulation
ENSMUSG00000024735.14	4286.08	0.485991	0.119829	1.27084e-05	0.000146624	Prpf19	Up regulation
ENSMUSG00000024740.11	6216.61	0.747196	0.122269	6.17863e-11	2.52035e-09	Ddb1	Up regulation
ENSMUSG00000024750.12	7046.8	0.57833	0.17424	0.000137642	0.00115316	Zfand5	Up regulation
ENSMUSG00000024780.8	2904.46	0.318603	0.11661	0.00351436	0.0175419	Cdc37l1	Up regulation
ENSMUSG00000024803.10	457.604	1.63255	0.227075	3.66916e-14	2.68389e-12	Ankrd1	Up regulation
ENSMUSG00000024805.17	1149.74	0.61969	0.273935	0.00313715	0.015952	Pcgf5	Up regulation
ENSMUSG00000024810.17	121.105	0.565445	0.225665	0.0020347	0.0111711	Il33	Up regulation
ENSMUSG00000024811.13	6994.83	0.313125	0.111335	0.00281557	0.0145664	Tnks2	Up regulation
ENSMUSG00000024830.18	526.538	0.517693	0.109867	5.20707e-07	8.6187e-06	Rps6kb2	Up regulation
ENSMUSG00000024845.20	709.46	0.526783	0.149935	8.89443e-05	0.000791395	Tmem134	Up regulation
ENSMUSG00000024853.11	4507.52	0.256015	0.077714	0.00069618	0.00455667	Sf3b2	Up regulation
ENSMUSG00000024892.18	1093.09	0.633257	0.227327	0.000641335	0.00425833	Pcx	Up regulation
ENSMUSG00000024896.10	207.366	0.433616	0.170346	0.00353528	0.0176293	Minpp1	Up regulation
ENSMUSG00000024908.16	3015.57	0.253819	0.0899426	0.00335585	0.0168648	Ppp6r3	Up regulation
ENSMUSG00000024912.7	7.29452	1.23831	0.607543	0.00095541	0.00592166	Fosl1	Up regulation
ENSMUSG00000024924.15	8530.34	0.587625	0.269548	0.00446267	0.021358	Vldlr	Up regulation
ENSMUSG00000024974.11	1749.59	0.309467	0.0891353	0.000306153	0.00226769	Smc3	Up regulation
ENSMUSG00000024976.15	826.991	0.293259	0.0983271	0.00177394	0.0099618	Shoc2	Up regulation
ENSMUSG00000024982.11	559.53	0.366797	0.101669	0.000144766	0.00120309	Zdhhc6	Up regulation
ENSMUSG00000024990.14	164.835	2.87633	1.00862	1.67134e-06	2.43405e-05	Rbp4	Up regulation
ENSMUSG00000024991.9	11039.1	0.398913	0.103637	4.79883e-05	0.000457911	Eif3a	Up regulation
ENSMUSG00000025006.19	8039.36	1.21931	0.423368	0.00012043	0.0010256	Sorbs1	Up regulation
ENSMUSG00000025019.18	1554.8	0.373181	0.0938785	3.22939e-05	0.000327005	Lcor	Up regulation
ENSMUSG00000025020.12	47.9735	0.869288	0.291827	0.000156523	0.00128549	Slit1	Up regulation
ENSMUSG00000025024.8	623.41	0.484494	0.10008	3.33708e-07	5.84693e-06	Smndc1	Up regulation
ENSMUSG00000025025.15	1328.77	0.905263	0.138912	3.24777e-12	1.65025e-10	Mxi1	Up regulation
ENSMUSG00000025075.15	47.692	0.881767	0.352862	0.000691248	0.00453589	Habp2	Up regulation
ENSMUSG00000025085.17	11687.3	0.822201	0.678747	0.0124631	0.0489816	Ablim1	Up regulation
ENSMUSG00000025103.9	5958.43	0.559111	0.125527	1.40186e-06	2.07792e-05	Btbd1	Up regulation
ENSMUSG00000025130.12	4638.45	0.319953	0.133922	0.00921897	0.0383014	P4hb	Up regulation
ENSMUSG00000025139.15	1082.92	0.403636	0.112864	0.000136841	0.0011472	Tollip	Up regulation
ENSMUSG00000025141.4	1578.11	0.511764	0.198299	0.0021391	0.011665	Myadml2	Up regulation
ENSMUSG00000025142.19	551.408	0.444837	0.208289	0.00978126	0.0402041	Aspscr1	Up regulation
ENSMUSG00000025155.16	718.962	0.333511	0.0901369	0.000116868	0.0009979	Dus1l	Up regulation
ENSMUSG00000025156.18	673.429	0.2555	0.10519	0.0104623	0.0424894	Gps1	Up regulation
ENSMUSG00000025172.4	19139.5	0.836302	0.660163	0.0113968	0.0455606	Ankrd2	Up regulation
ENSMUSG00000025178.10	646.938	0.458006	0.176185	0.00267448	0.0139878	Pi4k2a	Up regulation
ENSMUSG00000025184.11	514.022	0.266876	0.0971386	0.00404725	0.0197475	R3hcc1l	Up regulation
ENSMUSG00000025193.15	279.671	0.58756	0.143458	5.99197e-06	7.60662e-05	Cutc	Up regulation
ENSMUSG00000025220.9	2357.47	0.466637	0.0876578	2.92981e-08	6.84003e-07	Oga	Up regulation
ENSMUSG00000025224.17	2708.2	0.301724	0.103562	0.00214575	0.0116889	Gbf1	Up regulation
ENSMUSG00000025228.6	1571.59	0.472458	0.140903	0.000216803	0.00169075	Actr1a	Up regulation
ENSMUSG00000025229.16	210.587	0.757149	0.354487	0.00267918	0.0140039	Pitx3	Up regulation
ENSMUSG00000025234.12	3209.55	0.574968	0.162346	6.13707e-05	0.00056696	Arih1	Up regulation
ENSMUSG00000025236.12	588.562	0.497708	0.147856	0.000179948	0.00144299	Adpgk	Up regulation
ENSMUSG00000025239.4	2277.88	0.630052	0.149084	2.68586e-06	3.72858e-05	Limd1	Up regulation
ENSMUSG00000025257.6	9.9353	0.895068	0.482688	0.00358618	0.017828	Ribc1	Up regulation
ENSMUSG00000025260.11	670.617	0.425357	0.169027	0.00399816	0.0195524	Hsd17b10	Up regulation
ENSMUSG00000025261.19	12163.9	0.313132	0.0959229	0.000637588	0.00423981	Huwe1	Up regulation
ENSMUSG00000025262.9	765.651	0.242574	0.0831688	0.00257677	0.0135619	Fam120c	Up regulation
ENSMUSG00000025266.12	1250.71	0.373214	0.109884	0.000308851	0.00228309	Gnl3l	Up regulation
ENSMUSG00000025268.16	1203.64	0.733667	0.416827	0.00720784	0.0314647	Maged2	Up regulation
ENSMUSG00000025287.16	538.512	0.33049	0.144117	0.011336	0.0453667	Acot9	Up regulation
ENSMUSG00000025290.18	6377.76	0.515476	0.16828	0.000467787	0.00327194	Rps24	Up regulation
ENSMUSG00000025323.11	514.168	0.753952	0.143758	9.82824e-09	2.53266e-07	Sp4	Up regulation
ENSMUSG00000025326.13	5188.76	0.415707	0.164548	0.00408326	0.0198857	Ube3a	Up regulation
ENSMUSG00000025329.4	7.52312	1.09825	0.674604	0.00291755	0.0149859	Padi1	Up regulation
ENSMUSG00000025348.11	2921.42	0.477941	0.203362	0.00480827	0.0227107	Itga7	Up regulation
ENSMUSG00000025351.15	1683.77	0.730955	0.142317	1.92281e-08	4.67063e-07	Cd63	Up regulation
ENSMUSG00000025362.7	2950.07	0.48368	0.215237	0.00610997	0.027591	Rps26	Up regulation
ENSMUSG00000025364.14	1472.63	0.520547	0.174988	0.000609352	0.00407724	Pa2g4	Up regulation
ENSMUSG00000025369.16	2708.1	0.244432	0.0888399	0.00428253	0.0206536	Smarcc2	Up regulation
ENSMUSG00000025373.15	489.554	0.273446	0.105784	0.00638519	0.0285147	Rnf41	Up regulation
ENSMUSG00000025381.4	541.554	0.359596	0.101935	0.000202529	0.00159679	Cnpy2	Up regulation
ENSMUSG00000025404.16	5714.19	0.514716	0.134584	2.82232e-05	0.000291035	R3hdm2	Up regulation
ENSMUSG00000025410.11	1761.62	0.321712	0.0996063	0.000695713	0.00455477	Dctn2	Up regulation
ENSMUSG00000025423.17	927.46	0.494092	0.183828	0.00171272	0.00969188	Pias2	Up regulation
ENSMUSG00000025451.16	1230.25	0.290052	0.119726	0.00946188	0.0391092	Paip1	Up regulation
ENSMUSG00000025465.14	1768.66	0.697514	0.164771	1.89097e-06	2.72622e-05	Echs1	Up regulation
ENSMUSG00000025474.10	570.979	0.325008	0.103356	0.000919782	0.0057408	Tubgcp2	Up regulation
ENSMUSG00000025477.15	2275.21	0.62871	0.279723	0.0031434	0.0159744	Inpp5a	Up regulation
ENSMUSG00000025479.10	56.8645	1.9847	0.746575	3.46869e-05	0.000345811	Cyp2e1	Up regulation
ENSMUSG00000025487.16	1303.3	0.356759	0.142322	0.00571768	0.0260962	Psmd13	Up regulation
ENSMUSG00000025495.16	334.815	0.259059	0.0990831	0.00614443	0.0277098	Ptdss2	Up regulation
ENSMUSG00000025508.14	7551.18	0.804855	0.143967	1.20613e-09	3.79335e-08	Rplp2	Up regulation
ENSMUSG00000025509.16	6859.93	1.18659	0.172585	3.55355e-13	2.12398e-11	Pnpla2	Up regulation
ENSMUSG00000025521.16	158.085	0.413698	0.18351	0.00850139	0.0359506	Tmem192	Up regulation
ENSMUSG00000025544.14	2383.42	0.440873	0.129566	0.000215014	0.00168086	Tm9sf2	Up regulation
ENSMUSG00000025577.8	75.8266	0.73024	0.376387	0.00479049	0.0226424	Cbx2	Up regulation
ENSMUSG00000025579.15	4861.61	0.466463	0.223601	0.00991199	0.040625	Gaa	Up regulation
ENSMUSG00000025591.7	407.31	0.694721	0.170429	3.83636e-06	5.12991e-05	Tma16	Up regulation
ENSMUSG00000025610.8	507.087	1.63491	0.343293	6.50209e-08	1.37841e-06	Map3k7cl	Up regulation
ENSMUSG00000025612.6	1223.82	0.741519	0.0934699	1.31364e-16	1.41923e-14	Bach1	Up regulation
ENSMUSG00000025616.15	1801.78	0.531107	0.12488	4.13706e-06	5.49218e-05	Usp16	Up regulation
ENSMUSG00000025630.9	584.941	0.586993	0.193601	0.000357629	0.00259465	Hprt1	Up regulation
ENSMUSG00000025646.10	270.331	0.320509	0.100492	0.000803656	0.00515046	Atrip	Up regulation
ENSMUSG00000025650.14	383.492	1.55881	0.353917	3.53942e-07	6.17972e-06	Col7a1	Up regulation
ENSMUSG00000025702.16	932.12	0.419564	0.107281	3.35715e-05	0.000337165	Marchf8	Up regulation
ENSMUSG00000025723.13	14.2828	0.893514	0.398082	0.00137425	0.00805549	Nmb	Up regulation
ENSMUSG00000025738.9	123.186	0.570425	0.193205	0.000505602	0.00349348	Fbxl16	Up regulation
ENSMUSG00000025782.13	746.201	0.285039	0.10032	0.00285677	0.0147323	Taf3	Up regulation
ENSMUSG00000025786.18	1688.07	0.56058	0.136478	6.62299e-06	8.29352e-05	Zdhhc3	Up regulation
ENSMUSG00000025793.18	973.314	0.472173	0.135401	0.000132961	0.00111903	Hgs	Up regulation
ENSMUSG00000025794.10	2578.08	0.780649	0.14385	3.28212e-09	9.469e-08	Rpl14	Up regulation
ENSMUSG00000025815.15	92.7157	0.845665	0.237387	1.98174e-05	0.000213834	Dhtkd1	Up regulation
ENSMUSG00000025825.13	1716.07	0.346375	0.147009	0.00898742	0.0374902	Iscu	Up regulation
ENSMUSG00000025857.11	442.068	0.448786	0.111296	1.72881e-05	0.000190768	Dnaaf5	Up regulation
ENSMUSG00000025858.13	772.765	0.545543	0.21652	0.0021527	0.0117193	Get4	Up regulation
ENSMUSG00000025862.15	3277.45	0.484761	0.184915	0.00218475	0.0118563	Stag2	Up regulation
ENSMUSG00000025898.7	1749.64	0.423891	0.127565	0.000313117	0.00230868	Cwf19l2	Up regulation
ENSMUSG00000025911.15	500.233	1.08897	0.198603	1.91935e-09	5.76273e-08	Adhfe1	Up regulation
ENSMUSG00000025917.10	1566.72	0.655811	0.209483	0.000184804	0.00147643	Cops5	Up regulation
ENSMUSG00000025920.20	1415.72	0.643156	0.376496	0.0110469	0.0444266	Stau2	Up regulation
ENSMUSG00000025934.16	12.0963	1.51391	0.452408	1.82116e-05	0.000199508	Gsta3	Up regulation
ENSMUSG00000025956.11	227.829	0.518708	0.139157	4.07003e-05	0.000397324	Mettl21a	Up regulation
ENSMUSG00000025967.17	3031.17	0.58971	0.174697	0.000105656	0.0009169	Eef1b2	Up regulation
ENSMUSG00000026000.17	673.113	0.386105	0.16783	0.0086426	0.0363602	Lancl1	Up regulation
ENSMUSG00000026003.6	10474.3	0.407572	0.18872	0.0110831	0.0445271	Acadl	Up regulation
ENSMUSG00000026004.16	1145.02	0.570928	0.227094	0.00193551	0.0107108	Kansl1l	Up regulation
ENSMUSG00000026018.13	3.19909	1.55718	0.867884	0.000482157	0.00335501	Ica1l	Up regulation
ENSMUSG00000026021.16	1210.23	0.469396	0.10872	4.42413e-06	5.81351e-05	Sumo1	Up regulation
ENSMUSG00000026024.15	981.201	0.412904	0.0973387	8.42768e-06	0.000102117	Als2	Up regulation
ENSMUSG00000026037.15	489.392	0.503941	0.128722	2.07218e-05	0.000221577	Orc2	Up regulation
ENSMUSG00000026073.14	8.83529	1.50439	0.51668	6.55414e-05	0.00059906	Il1r2	Up regulation
ENSMUSG00000026082.12	918.368	0.760719	0.156625	7.43721e-08	1.55369e-06	Rev1	Up regulation
ENSMUSG00000026087.12	1452.91	0.448842	0.203516	0.00807476	0.0344807	Mrpl30	Up regulation
ENSMUSG00000026095.16	44.5719	0.651694	0.223008	0.000380911	0.00273817	Asnsd1	Up regulation
ENSMUSG00000026131.22	67822.6	0.434959	0.104624	1.08888e-05	0.000127858	Dst	Up regulation
ENSMUSG00000026135.18	714.387	0.449102	0.143455	0.000533788	0.00365499	Zfp142	Up regulation
ENSMUSG00000026141.14	107.485	0.830084	0.658326	0.011748	0.0467258	Col19a1	Up regulation
ENSMUSG00000026153.16	971.633	0.495563	0.131032	3.73506e-05	0.000369188	Fam135a	Up regulation
ENSMUSG00000026167.15	5.77082	0.803825	0.61135	0.0124931	0.0490623	Wnt10a	Up regulation
ENSMUSG00000026170.7	629.336	0.696508	0.436829	0.0116105	0.0463002	Cyp27a1	Up regulation
ENSMUSG00000026174.10	381.811	0.367565	0.12664	0.00168817	0.00957395	Cnot9	Up regulation
ENSMUSG00000026199.19	252.628	0.423896	0.142099	0.000991106	0.00611064	Ankzf1	Up regulation
ENSMUSG00000026207.17	16978.8	0.551939	0.151626	4.76055e-05	0.000454863	Speg	Up regulation
ENSMUSG00000026208.10	116480	1.02428	0.241168	9.0855e-07	1.40645e-05	Des	Up regulation
ENSMUSG00000026209.16	652.56	0.274815	0.105158	0.00585735	0.0266038	Dnpep	Up regulation
ENSMUSG00000026213.16	332.43	0.63016	0.116884	7.64677e-09	2.02926e-07	Stk11ip	Up regulation
ENSMUSG00000026229.18	3633.67	0.672283	0.174036	1.05003e-05	0.00012386	Psmd1	Up regulation
ENSMUSG00000026234.13	11006.5	0.552546	0.116711	3.79356e-07	6.54284e-06	Ncl	Up regulation
ENSMUSG00000026251.14	140.374	1.2769	0.412723	5.78298e-05	0.000538293	Chrnd	Up regulation
ENSMUSG00000026253.15	36.4602	2.49072	0.462564	3.0477e-10	1.06777e-08	Chrng	Up regulation
ENSMUSG00000026254.18	1222.8	0.254718	0.0919375	0.00391892	0.0192121	Eif4e2	Up regulation
ENSMUSG00000026269.15	1378.42	0.392291	0.133514	0.00134089	0.00789761	Rnpepl1	Up regulation
ENSMUSG00000026275.14	618.273	0.39478	0.110849	0.000151288	0.00125005	Ppp1r7	Up regulation
ENSMUSG00000026283.14	254.93	0.331567	0.107781	0.00112582	0.00678726	Ing5	Up regulation
ENSMUSG00000026313.17	2542.69	0.648403	0.0991381	5.94541e-12	2.89108e-10	Hdac4	Up regulation
ENSMUSG00000026342.11	476.306	0.926628	0.260224	1.71211e-05	0.000189005	Slc35f5	Up regulation
ENSMUSG00000026353.10	2771.3	0.458159	0.121858	5.0322e-05	0.000476831	Ubxn4	Up regulation
ENSMUSG00000026361.10	1871.94	0.580022	0.109253	1.60881e-08	3.9563e-07	Cdc73	Up regulation
ENSMUSG00000026374.15	831.728	0.311162	0.0931044	0.000487946	0.00338781	Tsn	Up regulation
ENSMUSG00000026393.11	3292.76	0.636742	0.284484	0.00312061	0.0158804	Nek7	Up regulation
ENSMUSG00000026404.13	295.667	0.895356	0.174113	1.24807e-08	3.14404e-07	Ddx59	Up regulation
ENSMUSG00000026414.15	401.58	1.67844	0.361017	1.00624e-07	2.02511e-06	Tnnt2	Up regulation
ENSMUSG00000026434.13	2417.47	0.484165	0.141386	0.000156909	0.00128825	Nucks1	Up regulation
ENSMUSG00000026435.16	47.6848	0.609992	0.286539	0.00463184	0.0220094	Slc45a3	Up regulation
ENSMUSG00000026455.15	718.057	0.417685	0.104707	2.44907e-05	0.000256333	Klhl12	Up regulation
ENSMUSG00000026456.19	1304.87	0.320032	0.124919	0.00573526	0.0261366	Cyb5r1	Up regulation
ENSMUSG00000026457.15	6705.86	0.597153	0.16103	2.84866e-05	0.0002934	Adipor1	Up regulation
ENSMUSG00000026458.14	145.066	0.599511	0.316313	0.00855944	0.0361133	Ppfia4	Up regulation
ENSMUSG00000026459.6	446.651	0.727182	0.251766	0.000317163	0.00233451	Myog	Up regulation
ENSMUSG00000026466.17	3966.47	0.780286	0.152103	1.67916e-08	4.12144e-07	Tor1aip1	Up regulation
ENSMUSG00000026471.15	477.152	0.770307	0.125596	4.97322e-11	2.06453e-09	Mr1	Up regulation
ENSMUSG00000026473.17	5909.63	3.02472	0.207245	6.1814e-51	1.5961e-47	Glul	Up regulation
ENSMUSG00000026479.14	153.683	1.11984	0.556317	0.00138327	0.00809549	Lamc2	Up regulation
ENSMUSG00000026491.14	2143.98	0.530214	0.181866	0.000701385	0.00458377	Ahctf1	Up regulation
ENSMUSG00000026492.12	475.383	0.437607	0.188138	0.00627981	0.0281855	Tfb2m	Up regulation
ENSMUSG00000026495.9	668.49	0.714296	0.146462	7.97869e-08	1.65343e-06	Efcab2	Up regulation
ENSMUSG00000026510.11	526.187	0.309658	0.110864	0.00302765	0.0154622	Trp53bp2	Up regulation
ENSMUSG00000026516.9	790.609	0.250353	0.101685	0.0097101	0.0399533	Nvl	Up regulation
ENSMUSG00000026553.18	4202.4	0.35818	0.086227	1.61105e-05	0.00017977	Copa	Up regulation
ENSMUSG00000026554.16	6844.72	0.759659	0.140187	3.6659e-09	1.04363e-07	Dcaf8	Up regulation
ENSMUSG00000026558.14	662.535	1.0512	0.331114	5.91585e-05	0.000548092	Uck2	Up regulation
ENSMUSG00000026564.10	5661.6	0.582762	0.238279	0.00222473	0.0120303	Styxl2	Up regulation
ENSMUSG00000026571.13	6835.77	0.765925	0.198195	7.26319e-06	8.97334e-05	Dcaf6	Up regulation
ENSMUSG00000026578.7	397.353	0.709079	0.171907	2.92173e-06	4.01287e-05	Ccdc181	Up regulation
ENSMUSG00000026585.14	791.32	0.545765	0.119302	8.57537e-07	1.33549e-05	Kifap3	Up regulation
ENSMUSG00000026586.17	2944.03	0.518812	0.239296	0.00629449	0.0282317	Prrx1	Up regulation
ENSMUSG00000026603.14	3037.39	0.821269	0.552277	0.00925585	0.0384175	Smyd2	Up regulation
ENSMUSG00000026604.18	1721.34	0.342966	0.144219	0.00861056	0.0362579	Ptpn14	Up regulation
ENSMUSG00000026609.16	8.06429	1.46764	0.662236	0.000359044	0.00260331	Ush2a	Up regulation
ENSMUSG00000026615.15	12313.9	0.479388	0.194224	0.00346832	0.0173456	Eprs1	Up regulation
ENSMUSG00000026618.12	2199.51	0.365882	0.0754495	5.9609e-07	9.68638e-06	Iars2	Up regulation
ENSMUSG00000026626.12	3181.99	0.268943	0.0929247	0.00255477	0.0134626	Ppp2r5a	Up regulation
ENSMUSG00000026634.17	718.227	0.561262	0.121663	6.5051e-07	1.04718e-05	Angel2	Up regulation
ENSMUSG00000026663.7	1861.4	0.739609	0.219211	5.51548e-05	0.000516184	Atf6	Up regulation
ENSMUSG00000026672.12	3879.49	0.839716	0.155441	3.27092e-09	9.45782e-08	Optn	Up regulation
ENSMUSG00000026688.6	2393.98	0.998218	0.217007	1.81335e-07	3.40776e-06	Mgst3	Up regulation
ENSMUSG00000026696.16	395.497	0.300152	0.11368	0.00494908	0.0232642	Vamp4	Up regulation
ENSMUSG00000026718.18	529.802	0.257762	0.0947231	0.00450625	0.0215195	Stam	Up regulation
ENSMUSG00000026730.13	330.27	0.422185	0.180045	0.00645718	0.0287704	Pter	Up regulation
ENSMUSG00000026739.14	1349.46	0.596928	0.147533	7.05328e-06	8.74328e-05	Bmi1	Up regulation
ENSMUSG00000026743.17	972.885	0.330516	0.110495	0.00149456	0.00863141	Mllt10	Up regulation
ENSMUSG00000026750.7	2157.03	0.459247	0.170997	0.00206752	0.0113201	Psmb7	Up regulation
ENSMUSG00000026753.6	1116.89	0.334499	0.144445	0.0105148	0.0426556	Ppp6c	Up regulation
ENSMUSG00000026764.16	45.7933	0.650322	0.360412	0.00869203	0.0365235	Kif5c	Up regulation
ENSMUSG00000026778.14	2331.8	0.922795	0.141132	2.79058e-12	1.444e-10	Prkcq	Up regulation
ENSMUSG00000026790.20	912.141	0.441648	0.127224	0.000166444	0.00135277	Odf2	Up regulation
ENSMUSG00000026791.15	163.646	0.340016	0.133549	0.00551755	0.0253368	Slc2a8	Up regulation
ENSMUSG00000026812.17	2473.76	0.994709	0.111699	2.56169e-20	4.75866e-18	Tsc1	Up regulation
ENSMUSG00000026822.15	23.9998	2.61534	0.452862	2.45e-11	1.07223e-09	Lcn2	Up regulation
ENSMUSG00000026831.17	5.55676	2.35495	0.892842	1.19724e-05	0.00013919	Pierce1	Up regulation
ENSMUSG00000026853.16	8735.74	0.51696	0.146742	9.06467e-05	0.00080393	Crat	Up regulation
ENSMUSG00000026867.20	1998.06	0.329419	0.0702798	1.55009e-06	2.27673e-05	Gapvd1	Up regulation
ENSMUSG00000026878.18	2506.87	0.458736	0.119229	3.52524e-05	0.000350637	Rab14	Up regulation
ENSMUSG00000026885.14	83.8514	0.579847	0.238817	0.00236971	0.0126815	Ttll11	Up regulation
ENSMUSG00000026917.16	539.179	0.273427	0.0925901	0.00208719	0.0114132	Wdr5	Up regulation
ENSMUSG00000026924.18	2088.73	0.201976	0.0681091	0.00244133	0.012976	Sec16a	Up regulation
ENSMUSG00000026926.15	2976.73	0.349591	0.137202	0.00526183	0.0244143	Pmpca	Up regulation
ENSMUSG00000026933.19	2201.27	1.00888	0.191918	6.4237e-09	1.72061e-07	Camsap1	Up regulation
ENSMUSG00000026950.19	884971	0.864739	0.207504	1.53302e-06	2.2555e-05	Neb	Up regulation
ENSMUSG00000026977.18	1413.02	0.274375	0.0779357	0.000288352	0.00214941	Marchf7	Up regulation
ENSMUSG00000026981.16	4.13992	1.23655	0.71538	0.00160069	0.00915425	Il1rn	Up regulation
ENSMUSG00000026991.21	690.085	0.632999	0.172209	2.70137e-05	0.000280242	Pkp4	Up regulation
ENSMUSG00000027012.16	1626.67	0.21653	0.0799267	0.00524293	0.0243485	Dync1i2	Up regulation
ENSMUSG00000027018.12	301.56	0.341703	0.151311	0.0118056	0.0469046	Hat1	Up regulation
ENSMUSG00000027022.15	176182	1.51182	0.244989	3.89146e-11	1.64185e-09	Xirp2	Up regulation
ENSMUSG00000027067.17	977.421	0.299701	0.100051	0.00166164	0.00944632	Ssrp1	Up regulation
ENSMUSG00000027074.15	653.136	0.514938	0.135595	3.14202e-05	0.000319033	Slc43a3	Up regulation
ENSMUSG00000027075.17	302.296	1.17327	0.466642	0.000365472	0.00263968	Slc43a1	Up regulation
ENSMUSG00000027079.16	116.317	0.563026	0.199274	0.000788665	0.00506444	Clp1	Up regulation
ENSMUSG00000027091.15	2398.81	0.374171	0.0928095	2.53495e-05	0.000264464	Zc3h15	Up regulation
ENSMUSG00000027104.19	679.831	0.340218	0.102785	0.000487123	0.00338391	Atf2	Up regulation
ENSMUSG00000027107.4	540.323	0.774386	0.308275	0.00088568	0.00556969	Chrna1	Up regulation
ENSMUSG00000027130.16	608.851	0.290887	0.0804155	0.000189032	0.00150648	Slc12a6	Up regulation
ENSMUSG00000027131.4	476.719	0.356538	0.149631	0.00800592	0.0342593	Emc4	Up regulation
ENSMUSG00000027170.13	1265.25	0.382688	0.169753	0.00988112	0.0405113	Eif3m	Up regulation
ENSMUSG00000027171.11	30.7447	2.58152	0.461998	7.82051e-11	3.11145e-09	Prrg4	Up regulation
ENSMUSG00000027177.15	13524.1	0.810972	0.172662	1.43603e-07	2.76921e-06	Hipk3	Up regulation
ENSMUSG00000027193.13	751.055	0.190261	0.0754452	0.00961133	0.0396002	Api5	Up regulation
ENSMUSG00000027194.17	938.16	0.27199	0.094317	0.00261405	0.0137302	Ttc17	Up regulation
ENSMUSG00000027208.15	117.542	0.680951	0.285609	0.00175943	0.00989547	Fgf7	Up regulation
ENSMUSG00000027236.9	1046.05	0.669617	0.22122	0.000248793	0.001904	Eif3j1	Up regulation
ENSMUSG00000027238.18	9.1515	0.743628	0.385539	0.00471597	0.0223392	Frmd5	Up regulation
ENSMUSG00000027243.9	137.957	0.300635	0.1298	0.0120575	0.0477217	Harbi1	Up regulation
ENSMUSG00000027244.15	921.814	0.843269	0.245759	3.29509e-05	0.000331964	Atg13	Up regulation
ENSMUSG00000027253.16	998.022	0.410675	0.1645	0.00454864	0.0216825	Lrp4	Up regulation
ENSMUSG00000027255.15	2419.58	0.53224	0.15741	0.00014079	0.00117534	Arfgap2	Up regulation
ENSMUSG00000027257.14	4346.94	0.538102	0.161754	0.000166104	0.00135128	Pacsin3	Up regulation
ENSMUSG00000027272.6	2296.43	0.358843	0.119545	0.00127879	0.00757328	Ubr1	Up regulation
ENSMUSG00000027282.18	1742.67	0.436708	0.145875	0.000896111	0.00562489	Mtch2	Up regulation
ENSMUSG00000027288.17	53781.1	0.89886	0.19758	2.49725e-07	4.52819e-06	Zfp106	Up regulation
ENSMUSG00000027293.14	1783.8	0.705959	0.234099	0.000223714	0.00173782	Ehd4	Up regulation
ENSMUSG00000027304.10	1635.22	0.482101	0.100392	4.11093e-07	7.01111e-06	Rtf1	Up regulation
ENSMUSG00000027324.2	129.428	0.33467	0.147305	0.0117568	0.046748	Rpusd2	Up regulation
ENSMUSG00000027332.12	2986.68	0.715007	0.163936	9.79123e-07	1.50577e-05	Ivd	Up regulation
ENSMUSG00000027341.11	220.064	0.380284	0.116986	0.00050149	0.00347157	Tmem230	Up regulation
ENSMUSG00000027353.15	58.7116	0.521267	0.163602	0.000298631	0.00221643	Mcm8	Up regulation
ENSMUSG00000027363.16	1372.5	0.183954	0.0652375	0.00402716	0.0196644	Usp8	Up regulation
ENSMUSG00000027365.15	2505.08	0.39918	0.132751	0.00103918	0.00635242	Trpm7	Up regulation
ENSMUSG00000027367.17	4232.34	0.421032	0.117983	0.000128965	0.00108824	Stard7	Up regulation
ENSMUSG00000027375.15	106.726	0.978584	0.449619	0.00133754	0.00787966	Mal	Up regulation
ENSMUSG00000027378.17	614.695	0.555559	0.105517	2.36801e-08	5.66152e-07	Nphp1	Up regulation
ENSMUSG00000027381.18	287.819	0.42044	0.128347	0.000376468	0.00270849	Bcl2l11	Up regulation
ENSMUSG00000027405.17	783.751	0.318644	0.0865898	0.000134086	0.0011274	Nop56	Up regulation
ENSMUSG00000027423.16	1538.91	0.355758	0.113165	0.00081007	0.00518384	Snx5	Up regulation
ENSMUSG00000027425.19	782.875	0.63578	0.128855	8.63662e-08	1.77412e-06	Kat14	Up regulation
ENSMUSG00000027427.14	375.414	0.333221	0.11905	0.00270553	0.0141111	Polr3f	Up regulation
ENSMUSG00000027438.15	498.475	0.881752	0.285144	0.000103353	0.000900367	Napb	Up regulation
ENSMUSG00000027452.12	1524.24	0.763896	0.431993	0.00642219	0.0286551	Acss1	Up regulation
ENSMUSG00000027485.16	4.67313	2.81919	0.804417	3.98593e-07	6.8174e-06	Bpifb1	Up regulation
ENSMUSG00000027488.13	3397.94	1.05655	0.165559	8.32107e-12	3.94954e-10	Snta1	Up regulation
ENSMUSG00000027502.12	824.756	0.299387	0.0990677	0.00152549	0.00877861	Rtf2	Up regulation
ENSMUSG00000027506.16	701.976	0.3265	0.138621	0.00981036	0.0403014	Tpd52	Up regulation
ENSMUSG00000027508.16	247.862	0.560476	0.281873	0.00808684	0.0345141	Pag1	Up regulation
ENSMUSG00000027510.18	2878.11	0.468809	0.187721	0.00337727	0.0169658	Rbm38	Up regulation
ENSMUSG00000027519.11	1473.22	0.304209	0.0934844	0.000683447	0.00449727	Rab22a	Up regulation
ENSMUSG00000027520.17	536.77	1.33062	0.239168	1.42094e-09	4.40851e-08	Zdbf2	Up regulation
ENSMUSG00000027523.21	23113.5	0.353576	0.118494	0.00138688	0.00811115	Gnas	Up regulation
ENSMUSG00000027544.17	1269.75	0.846963	0.347602	0.000903439	0.00565657	Nfatc2	Up regulation
ENSMUSG00000027546.16	968.731	0.666883	0.349338	0.00641424	0.0286246	Atp9a	Up regulation
ENSMUSG00000027556.16	3.15365	1.8009	0.876089	0.00016165	0.00132088	Car1	Up regulation
ENSMUSG00000027559.6	50580.6	1.3991	0.421726	2.40337e-05	0.000252368	Car3	Up regulation
ENSMUSG00000027562.13	240.369	0.508403	0.214441	0.00390668	0.0191704	Car2	Up regulation
ENSMUSG00000027566.16	1910.24	0.80705	0.115145	1.23277e-13	8.1619e-12	Psma7	Up regulation
ENSMUSG00000027589.15	1039.44	0.455569	0.122926	6.312e-05	0.000581042	Pcmtd2	Up regulation
ENSMUSG00000027597.16	210.8	0.731548	0.197952	1.63329e-05	0.000181312	Ahcy	Up regulation
ENSMUSG00000027598.17	1266.85	0.255639	0.0805963	0.00106766	0.00649017	Itch	Up regulation
ENSMUSG00000027602.10	3514.12	1.22773	0.136177	1.37408e-20	2.58979e-18	Map1lc3a	Up regulation
ENSMUSG00000027612.8	4.6596	1.30527	0.712944	0.00111213	0.00672195	Mmp24	Up regulation
ENSMUSG00000027613.16	727.004	0.538975	0.192663	0.000972216	0.00600708	Eif6	Up regulation
ENSMUSG00000027618.18	1095.65	0.347867	0.123319	0.00237666	0.0127108	Nfs1	Up regulation
ENSMUSG00000027628.11	524.31	0.331603	0.128205	0.00509942	0.023858	Aar2	Up regulation
ENSMUSG00000027630.14	1957.03	0.832015	0.158888	8.29636e-09	2.18085e-07	Tbl1xr1	Up regulation
ENSMUSG00000027637.4	541.407	0.311694	0.0924006	0.000435318	0.00307113	Rab5if	Up regulation
ENSMUSG00000027651.17	1076.27	0.444845	0.133083	0.000261411	0.00199053	Rprd1b	Up regulation
ENSMUSG00000027665.14	2616.75	0.486201	0.203715	0.00418413	0.0202878	Pik3ca	Up regulation
ENSMUSG00000027667.14	463.991	0.376484	0.148153	0.00474264	0.022445	Zfp639	Up regulation
ENSMUSG00000027680.16	12749.3	0.467312	0.195468	0.00455406	0.0217015	Fxr1	Up regulation
ENSMUSG00000027692.17	3691.22	0.402427	0.172401	0.00732026	0.0318611	Tnik	Up regulation
ENSMUSG00000027706.9	2289.52	0.645268	0.143888	7.56799e-07	1.19877e-05	Sec62	Up regulation
ENSMUSG00000027742.14	1754.25	0.457018	0.193608	0.00520004	0.024219	Cog6	Up regulation
ENSMUSG00000027782.11	4068.89	0.42348	0.174759	0.00521045	0.0242456	Kpna4	Up regulation
ENSMUSG00000027796.3	26.0156	0.652036	0.393821	0.0119695	0.0474463	Smad9	Up regulation
ENSMUSG00000027805.17	2533.45	0.896255	0.200681	3.71903e-07	6.43195e-06	Pfn2	Up regulation
ENSMUSG00000027810.15	688.209	0.522528	0.15406	0.000142961	0.00119039	Eif2a	Up regulation
ENSMUSG00000027820.13	249.184	0.566515	0.250765	0.00398615	0.0195047	Mme	Up regulation
ENSMUSG00000027823.10	1454.37	0.353404	0.125435	0.00234421	0.0125692	Gmps	Up regulation
ENSMUSG00000027824.6	20.6914	1.65876	0.31817	6.97956e-09	1.86369e-07	Vmn2r1	Up regulation
ENSMUSG00000027868.12	6061.8	0.949236	0.329671	0.000185055	0.00147798	Tbx15	Up regulation
ENSMUSG00000027884.17	692.697	0.947508	0.147526	5.9941e-12	2.90928e-10	Clcc1	Up regulation
ENSMUSG00000027905.16	357.023	0.530338	0.143894	4.49629e-05	0.00043369	Ddx20	Up regulation
ENSMUSG00000027947.12	324.181	1.63686	0.142096	7.39784e-32	4.34136e-29	Il6ra	Up regulation
ENSMUSG00000028029.12	1639.22	0.378328	0.136134	0.00235019	0.0125927	Aimp1	Up regulation
ENSMUSG00000028033.17	548.411	0.984684	0.117266	2.16002e-18	2.99859e-16	Kcnq5	Up regulation
ENSMUSG00000028035.14	2833.48	0.826028	0.40023	0.0026346	0.0138156	Dnajb4	Up regulation
ENSMUSG00000028036.7	88.238	2.03971	0.316644	2.06002e-12	1.08554e-10	Ptgfr	Up regulation
ENSMUSG00000028048.12	366.469	0.288653	0.106024	0.00405055	0.0197599	Gba1	Up regulation
ENSMUSG00000028053.14	4731.02	0.381556	0.0848091	3.04314e-06	4.16191e-05	Ash1l	Up regulation
ENSMUSG00000028080.17	2574.75	0.430428	0.0862599	2.11872e-07	3.9245e-06	Lrba	Up regulation
ENSMUSG00000028081.7	3687.66	0.526998	0.170015	0.00038898	0.00278609	Rps3a1	Up regulation
ENSMUSG00000028089.6	721.927	0.620235	0.0878966	1.92927e-13	1.21799e-11	Chd1l	Up regulation
ENSMUSG00000028098.14	2862.94	0.644722	0.316426	0.00508522	0.0237959	Rnf115	Up regulation
ENSMUSG00000028104.15	738.731	0.463131	0.148895	0.000529948	0.00363351	Polr3gl	Up regulation
ENSMUSG00000028106.14	1654.24	0.52666	0.0794251	6.71925e-12	3.23087e-10	Rprd2	Up regulation
ENSMUSG00000028124.17	363.069	0.523037	0.15364	0.000136154	0.00114243	Gclm	Up regulation
ENSMUSG00000028125.15	41.8191	0.63161	0.367921	0.0113187	0.0453045	Abca4	Up regulation
ENSMUSG00000028126.17	745.504	0.472447	0.0996309	5.85831e-07	9.53166e-06	Pip5k1a	Up regulation
ENSMUSG00000028134.12	800.479	0.316439	0.107494	0.00184209	0.0102776	Ptbp2	Up regulation
ENSMUSG00000028139.6	73.2708	0.888036	0.39494	0.00137825	0.00807343	Riiad1	Up regulation
ENSMUSG00000028149.13	1483.48	0.255199	0.0788232	0.00085174	0.00539411	Rap1gds1	Up regulation
ENSMUSG00000028150.15	1822.8	2.25853	0.19658	1.43253e-32	8.80698e-30	Rorc	Up regulation
ENSMUSG00000028158.15	96.9513	0.407945	0.180919	0.0087345	0.0366602	Mttp	Up regulation
ENSMUSG00000028177.15	6.19919	0.844668	0.579764	0.00893604	0.0373301	1810013D15Rik	Up regulation
ENSMUSG00000028179.13	84.8977	1.77197	0.287501	2.59432e-11	1.12396e-09	Cth	Up regulation
ENSMUSG00000028211.12	560.905	1.13387	0.221422	1.38481e-08	3.44815e-07	Trp53inp1	Up regulation
ENSMUSG00000028234.7	3003.76	0.742933	0.126674	2.86969e-10	1.01504e-08	Rps20	Up regulation
ENSMUSG00000028238.7	16.588	2.75535	0.530244	4.24636e-10	1.46194e-08	Atp6v0d2	Up regulation
ENSMUSG00000028259.14	25.3883	0.516979	0.265724	0.0108588	0.0437965	Fhl5	Up regulation
ENSMUSG00000028262.14	3.15095	2.90617	1.28521	3.60071e-06	4.84744e-05	Clca3a2	Up regulation
ENSMUSG00000028266.18	346.502	0.448265	0.0952687	8.04077e-07	1.26598e-05	Lmo4	Up regulation
ENSMUSG00000028273.17	8739.32	1.07213	0.199826	3.64152e-09	1.03783e-07	Pdlim5	Up regulation
ENSMUSG00000028277.14	852.941	0.562039	0.133248	4.0428e-06	5.38088e-05	Ube2j1	Up regulation
ENSMUSG00000028280.10	11.6004	3.11736	0.733491	1.33034e-08	3.32857e-07	Gabrr1	Up regulation
ENSMUSG00000028284.14	2832.83	0.442763	0.15861	0.00163986	0.00933896	Map3k7	Up regulation
ENSMUSG00000028291.8	1030.02	0.595729	0.142853	4.13443e-06	5.49151e-05	Akirin2	Up regulation
ENSMUSG00000028333.11	2060.01	0.644374	0.147506	1.30723e-06	1.94771e-05	Anp32b	Up regulation
ENSMUSG00000028345.16	451.851	0.33062	0.141273	0.0100295	0.0409829	Tex10	Up regulation
ENSMUSG00000028347.15	54.4379	1.24609	0.590047	0.000806637	0.005167	Tmeff1	Up regulation
ENSMUSG00000028367.6	392.409	0.265803	0.102858	0.0065631	0.0291529	Txn1	Up regulation
ENSMUSG00000028394.10	465.626	0.587187	0.147226	9.51448e-06	0.00011358	Pole3	Up regulation
ENSMUSG00000028396.6	1633.93	0.909426	0.357632	0.000569665	0.00385061	2310002L09Rik	Up regulation
ENSMUSG00000028399.19	710.489	0.879547	0.254323	2.75144e-05	0.000284749	Ptprd	Up regulation
ENSMUSG00000028416.14	4875.49	0.59521	0.184476	0.000175736	0.00141493	Bag1	Up regulation
ENSMUSG00000028417.4	42.3407	1.26293	0.399016	4.71341e-05	0.000451093	Tal2	Up regulation
ENSMUSG00000028420.14	1186.36	0.916971	0.146644	1.80985e-11	8.14147e-10	Tmem38b	Up regulation
ENSMUSG00000028423.16	1036.89	0.344429	0.0750727	2.35555e-06	3.32364e-05	Nfx1	Up regulation
ENSMUSG00000028426.11	3410.3	0.446249	0.121747	7.78285e-05	0.000700701	Rad23b	Up regulation
ENSMUSG00000028431.12	1322.98	0.380367	0.0714631	4.63233e-08	1.02837e-06	Elp1	Up regulation
ENSMUSG00000028433.15	2783.62	0.722794	0.132883	3.7425e-09	1.06192e-07	Ubap2	Up regulation
ENSMUSG00000028436.9	925.093	0.313433	0.0956248	0.000607766	0.00407018	Dcaf12	Up regulation
ENSMUSG00000028437.15	1030.06	0.302968	0.126686	0.00979964	0.0402717	Ubap1	Up regulation
ENSMUSG00000028439.15	808.476	0.574495	0.174507	0.000154766	0.00127309	Fam219a	Up regulation
ENSMUSG00000028445.8	200.885	0.782783	0.257657	0.000159932	0.00130932	Enho	Up regulation
ENSMUSG00000028452.8	7048.34	0.413679	0.153816	0.0025842	0.0135955	Vcp	Up regulation
ENSMUSG00000028455.16	1104.46	0.365233	0.144723	0.00524824	0.0243644	Stoml2	Up regulation
ENSMUSG00000028458.13	1112.16	0.451658	0.159939	0.00141733	0.00826674	Tesk1	Up regulation
ENSMUSG00000028461.13	574.602	0.579553	0.260376	0.00410375	0.0199666	Ccdc107	Up regulation
ENSMUSG00000028495.15	567.023	0.531761	0.15352	0.000104167	0.000906541	Rps6	Up regulation
ENSMUSG00000028514.17	7029.68	0.397433	0.121171	0.000416683	0.00295663	Usp24	Up regulation
ENSMUSG00000028522.17	1244.14	0.21362	0.0610064	0.000366007	0.00264207	Mier1	Up regulation
ENSMUSG00000028538.13	1119.74	0.380359	0.135214	0.00209908	0.0114686	St3gal3	Up regulation
ENSMUSG00000028572.14	800.553	1.066	0.338462	6.32519e-05	0.000581569	Hook1	Up regulation
ENSMUSG00000028573.19	176.037	0.909498	0.13999	3.7005e-12	1.86622e-10	Fggy	Up regulation
ENSMUSG00000028576.13	222.682	0.545807	0.13851	1.46613e-05	0.000166039	Ift74	Up regulation
ENSMUSG00000028577.14	1233.85	0.409297	0.103542	2.97305e-05	0.000303908	Plaa	Up regulation
ENSMUSG00000028580.16	1827.69	0.314981	0.0789334	3.86493e-05	0.000379743	Pum1	Up regulation
ENSMUSG00000028582.15	708.587	0.399592	0.10148	3.32624e-05	0.000334581	Cc2d1b	Up regulation
ENSMUSG00000028600.17	598.529	0.534584	0.177851	0.000510968	0.00352208	Podn	Up regulation
ENSMUSG00000028619.16	334.185	0.313839	0.105666	0.00171012	0.00968353	Tceanc2	Up regulation
ENSMUSG00000028633.8	522.306	0.466378	0.160058	0.000989953	0.00610499	Ctps1	Up regulation
ENSMUSG00000028639.15	16851.4	0.457169	0.129656	0.000124895	0.00105805	Ybx1	Up regulation
ENSMUSG00000028644.18	6.33249	0.714133	0.446017	0.0107827	0.0435636	Ermap	Up regulation
ENSMUSG00000028645.12	309.926	1.20118	0.275795	5.48727e-07	9.00743e-06	Slc2a1	Up regulation
ENSMUSG00000028646.17	642.842	0.335406	0.0862752	5.46743e-05	0.000512244	Rragc	Up regulation
ENSMUSG00000028647.14	211.393	0.466428	0.169896	0.00166646	0.00946748	Mycbp	Up regulation
ENSMUSG00000028653.17	225.509	0.416117	0.160202	0.00333373	0.0167765	Trit1	Up regulation
ENSMUSG00000028654.14	35.0476	1.33073	0.408718	3.22432e-05	0.000326747	Mycl	Up regulation
ENSMUSG00000028655.12	6.13635	1.20765	0.653405	0.00147404	0.0085301	Mfsd2a	Up regulation
ENSMUSG00000028668.6	2863.78	0.514313	0.123394	6.64119e-06	8.30825e-05	Eloa	Up regulation
ENSMUSG00000028669.16	677.909	0.546812	0.162622	0.000139191	0.00116426	Pithd1	Up regulation
ENSMUSG00000028676.18	986.097	0.292825	0.103623	0.00291509	0.0149792	Srsf10	Up regulation
ENSMUSG00000028683.15	392.123	0.539365	0.150513	6.35347e-05	0.000583196	Eif2b3	Up regulation
ENSMUSG00000028692.15	2002.7	0.365712	0.127814	0.0019366	0.0107146	Akr1a1	Up regulation
ENSMUSG00000028696.13	321.757	0.495744	0.166998	0.000709909	0.0046301	Ipp	Up regulation
ENSMUSG00000028700.15	1562.43	0.71907	0.230062	0.000145786	0.00121079	Pomgnt1	Up regulation
ENSMUSG00000028737.16	491.518	0.329011	0.123517	0.0041254	0.0200682	Aldh4a1	Up regulation
ENSMUSG00000028750.13	1.79279	1.19556	0.896286	0.00220856	0.0119504	Pla2g2c	Up regulation
ENSMUSG00000028756.13	10253.7	0.892989	0.162373	1.74689e-09	5.30839e-08	Pink1	Up regulation
ENSMUSG00000028789.17	58.1463	1.33258	0.19887	1.33865e-12	7.2464e-11	Azin2	Up regulation
ENSMUSG00000028793.16	552.27	0.691103	0.143237	1.14906e-07	2.26662e-06	Rnf19b	Up regulation
ENSMUSG00000028798.17	1672.67	0.48509	0.129733	4.70046e-05	0.000450188	Eif3i	Up regulation
ENSMUSG00000028809.17	3407.32	0.580377	0.0599681	5.32423e-23	1.36116e-20	Srrm1	Up regulation
ENSMUSG00000028821.9	1201.47	0.546179	0.0977886	4.1686e-09	1.16617e-07	Syf2	Up regulation
ENSMUSG00000028822.12	515.375	0.448732	0.0895967	1.74258e-07	3.28672e-06	Tmem50a	Up regulation
ENSMUSG00000028826.15	1307.85	1.04001	0.151344	3.03215e-13	1.83356e-11	Maco1	Up regulation
ENSMUSG00000028834.14	4828.92	1.26869	0.298097	8.31975e-07	1.30276e-05	Trim63	Up regulation
ENSMUSG00000028837.9	705.476	0.433213	0.139567	0.000634763	0.00422211	Psmb2	Up regulation
ENSMUSG00000028840.11	172.686	0.693263	0.227549	0.000211347	0.0016552	Zfp593	Up regulation
ENSMUSG00000028841.15	1255.77	1.67524	0.23593	6.38493e-14	4.45582e-12	Cnksr1	Up regulation
ENSMUSG00000028857.17	268.79	0.381232	0.173347	0.0114181	0.0456176	Tmem222	Up regulation
ENSMUSG00000028861.14	1279.54	0.429232	0.131128	0.000362736	0.00262402	Mrps15	Up regulation
ENSMUSG00000028862.7	265.847	0.529205	0.262149	0.00864744	0.0363717	Map3k6	Up regulation
ENSMUSG00000028869.14	1109.1	0.40461	0.109767	8.92505e-05	0.000793573	Gnl2	Up regulation
ENSMUSG00000028878.12	1065.44	0.636932	0.113755	2.25974e-09	6.69137e-08	Fam76a	Up regulation
ENSMUSG00000028884.15	294.928	0.429363	0.15149	0.00154166	0.00886177	Rpa2	Up regulation
ENSMUSG00000028901.14	402.158	0.388491	0.0976752	2.97658e-05	0.000304148	Gmeb1	Up regulation
ENSMUSG00000028907.8	768.067	0.412275	0.139517	0.00115093	0.00691767	Utp11	Up regulation
ENSMUSG00000028909.18	49.3807	1.17687	0.315152	7.01018e-06	8.7024e-05	Ptpru	Up regulation
ENSMUSG00000028932.9	1892.89	0.461576	0.122028	4.50934e-05	0.000434461	Psmc2	Up regulation
ENSMUSG00000028936.16	3566.19	0.823397	0.22092	1.08594e-05	0.000127601	Rpl22	Up regulation
ENSMUSG00000028948.17	460.206	0.326426	0.113538	0.00219979	0.0119179	Nol9	Up regulation
ENSMUSG00000028953.11	3339.14	0.412854	0.148143	0.00193887	0.0107248	Abcf2	Up regulation
ENSMUSG00000028954.12	1146.22	0.540428	0.0647465	1.29404e-17	1.62992e-15	Nub1	Up regulation
ENSMUSG00000028960.21	2145.31	0.741112	0.075212	3.99575e-24	1.1997e-21	Ube4b	Up regulation
ENSMUSG00000028970.10	276.165	0.447656	0.197544	0.00696852	0.0306464	Abcb1b	Up regulation
ENSMUSG00000028986.13	1181.81	0.740324	0.14981	5.16658e-08	1.12484e-06	Klhl7	Up regulation
ENSMUSG00000028991.16	2617.35	0.45869	0.106511	4.93734e-06	6.42575e-05	Mtor	Up regulation
ENSMUSG00000029003.12	92.089	0.525398	0.181896	0.000784029	0.00504345	Mad2l2	Up regulation
ENSMUSG00000029005.5	6.70386	0.839502	0.563263	0.00864331	0.0363602	Draxin	Up regulation
ENSMUSG00000029014.15	1483.71	0.722562	0.142311	2.71808e-08	6.4036e-07	Dnajc2	Up regulation
ENSMUSG00000029020.14	14823.9	0.467289	0.121589	3.42128e-05	0.000341786	Mfn2	Up regulation
ENSMUSG00000029022.19	199.508	0.366677	0.152202	0.00712536	0.0311868	Miip	Up regulation
ENSMUSG00000029026.18	3.92964	1.36699	0.704419	0.000777711	0.00500905	Trp73	Up regulation
ENSMUSG00000029028.15	927.639	0.534663	0.153613	9.62867e-05	0.000847382	Lrrc47	Up regulation
ENSMUSG00000029029.15	181.309	0.391596	0.158396	0.00533918	0.0246919	Wrap73	Up regulation
ENSMUSG00000029030.15	1577.19	0.537742	0.11674	7.72489e-07	1.21922e-05	Tprg1l	Up regulation
ENSMUSG00000029034.10	448.609	0.319306	0.0874288	0.000148978	0.00123452	Ints11	Up regulation
ENSMUSG00000029038.10	674.543	0.480405	0.178601	0.00182864	0.0102132	Ssu72	Up regulation
ENSMUSG00000029048.4	910.181	0.314986	0.117608	0.00418378	0.0202878	Rer1	Up regulation
ENSMUSG00000029053.17	67.8163	0.700419	0.269078	0.000861535	0.00544303	Prkcz	Up regulation
ENSMUSG00000029076.15	1984.13	0.424075	0.104893	1.88736e-05	0.000205367	Sdf4	Up regulation
ENSMUSG00000029086.16	88.5257	0.615615	0.253872	0.00203852	0.0111876	Prom1	Up regulation
ENSMUSG00000029095.18	1421.64	0.288898	0.112551	0.00637164	0.0284591	Ablim2	Up regulation
ENSMUSG00000029096.16	1108.83	0.713248	0.175762	3.84817e-06	5.14305e-05	Htra3	Up regulation
ENSMUSG00000029131.15	1452.6	0.77358	0.100789	9.16313e-16	8.63508e-14	Dnajb6	Up regulation
ENSMUSG00000029134.15	24.0295	0.805845	0.382645	0.00250451	0.01326	Plb1	Up regulation
ENSMUSG00000029136.10	48.2461	0.931529	0.276552	3.5113e-05	0.000349789	Rbks	Up regulation
ENSMUSG00000029147.12	1257.78	0.446567	0.125319	0.000114872	0.000984766	Ppm1g	Up regulation
ENSMUSG00000029152.14	1833.29	0.497973	0.107143	8.00133e-07	1.26054e-05	Ociad1	Up regulation
ENSMUSG00000029169.12	1554.13	0.206792	0.08132	0.00871845	0.0366061	Dhx15	Up regulation
ENSMUSG00000029176.14	1069.18	0.263137	0.0992103	0.00543411	0.0250338	Anapc4	Up regulation
ENSMUSG00000029190.20	4890.58	0.334012	0.136412	0.00740949	0.0321926	D5Ertd579e	Up regulation
ENSMUSG00000029196.10	659.199	0.425486	0.170277	0.00419683	0.0203352	Tada2b	Up regulation
ENSMUSG00000029199.12	720.177	0.454024	0.154668	0.000986589	0.00608861	Lias	Up regulation
ENSMUSG00000029205.13	14.0026	1.31632	0.592377	0.000533455	0.00365367	Chrna9	Up regulation
ENSMUSG00000029217.17	206.549	0.465196	0.203214	0.00601422	0.0272205	Tec	Up regulation
ENSMUSG00000029227.16	1363.32	0.307862	0.115835	0.00456805	0.0217583	Fip1l1	Up regulation
ENSMUSG00000029229.9	604.047	0.305402	0.0770915	4.5187e-05	0.000434876	Chic2	Up regulation
ENSMUSG00000029250.6	1369.84	0.34162	0.142606	0.00826946	0.0351425	Polr2b	Up regulation
ENSMUSG00000029267.18	547.378	0.267556	0.100537	0.00521851	0.0242733	Mtf2	Up regulation
ENSMUSG00000029287.15	1855.68	0.654248	0.137835	2.02837e-07	3.77339e-06	Tgfbr3	Up regulation
ENSMUSG00000029304.15	246.858	1.31115	0.807244	0.00135536	0.00796322	Spp1	Up regulation
ENSMUSG00000029306.9	164.585	0.922194	1.13518	0.00103369	0.00632489	Ibsp	Up regulation
ENSMUSG00000029310.14	963.137	0.309481	0.106859	0.00220102	0.0119221	Nudt9	Up regulation
ENSMUSG00000029313.19	2820.57	0.717643	0.123893	4.89994e-10	1.66915e-08	Aff1	Up regulation
ENSMUSG00000029319.9	1147.74	0.493658	0.12794	2.77065e-05	0.000286508	Coq2	Up regulation
ENSMUSG00000029321.2	43.9208	0.861112	0.334786	0.00058427	0.00393388	Slc10a6	Up regulation
ENSMUSG00000029368.11	3.98846	0.871921	0.819946	0.00863729	0.0363526	Alb	Up regulation
ENSMUSG00000029385.15	346.495	0.530939	0.102325	4.15253e-08	9.3075e-07	Ccng2	Up regulation
ENSMUSG00000029388.15	609.217	0.43567	0.144596	0.000846202	0.00536524	Eif2b1	Up regulation
ENSMUSG00000029390.14	2014.55	0.530577	0.179437	0.000612375	0.0040964	Tmed2	Up regulation
ENSMUSG00000029392.13	3833.37	0.914731	0.278575	4.92312e-05	0.000467696	Rilpl1	Up regulation
ENSMUSG00000029402.9	186.575	0.383361	0.154412	0.00539794	0.0249116	Snrnp35	Up regulation
ENSMUSG00000029404.16	1015.43	0.585716	0.115547	5.65782e-08	1.22354e-06	Arl6ip4	Up regulation
ENSMUSG00000029415.5	598.038	0.319029	0.115777	0.00327076	0.0164988	Sdad1	Up regulation
ENSMUSG00000029416.18	348.907	0.452072	0.13239	0.00019383	0.00153891	Slc15a4	Up regulation
ENSMUSG00000029422.16	2441.25	0.391256	0.11148	0.000186935	0.00149115	Rsrc2	Up regulation
ENSMUSG00000029432.13	9675.08	0.452132	0.144047	0.000510949	0.00352208	Nipsnap2	Up regulation
ENSMUSG00000029434.13	1513.75	0.564813	0.136811	5.90302e-06	7.50107e-05	Vps33a	Up regulation
ENSMUSG00000029438.10	786.245	0.779979	0.121815	8.49031e-12	4.00783e-10	Bcl7a	Up regulation
ENSMUSG00000029458.15	1488.46	0.377149	0.112684	0.000362316	0.00262202	Brap	Up regulation
ENSMUSG00000029461.18	1601.33	0.367803	0.131966	0.00240913	0.0128499	Fam168a	Up regulation
ENSMUSG00000029472.14	7778.24	0.617498	0.330847	0.00852775	0.0360444	Anapc5	Up regulation
ENSMUSG00000029474.8	356.05	0.311403	0.119434	0.00521498	0.0242624	Rnf34	Up regulation
ENSMUSG00000029490.5	50.1443	0.839995	0.288912	0.0002129	0.00166585	Slc49a3	Up regulation
ENSMUSG00000029499.12	479.538	0.852056	0.126763	8.53685e-13	4.79196e-11	Pxmp2	Up regulation
ENSMUSG00000029501.16	1160.04	0.516912	0.0910811	2.95849e-09	8.6123e-08	Ankle2	Up regulation
ENSMUSG00000029502.15	4037.06	0.468469	0.147053	0.000398788	0.00284607	Golga3	Up regulation
ENSMUSG00000029504.6	263.021	0.445417	0.134055	0.000279849	0.00209509	Ddx51	Up regulation
ENSMUSG00000029512.12	1947.63	0.447421	0.155176	0.00120478	0.00720107	Ulk1	Up regulation
ENSMUSG00000029518.16	637.371	0.509831	0.146485	0.000110612	0.000954166	Rab35	Up regulation
ENSMUSG00000029528.20	2667.82	0.42189	0.123553	0.000227477	0.00176122	Pxn	Up regulation
ENSMUSG00000029577.14	6107.03	0.623698	0.157603	8.93426e-06	0.000107498	Ube3b	Up regulation
ENSMUSG00000029578.16	1003.04	0.445517	0.0579525	4.92401e-15	4.18233e-13	Wipi2	Up regulation
ENSMUSG00000029598.13	934.019	0.511394	0.200585	0.00234434	0.0125692	Plbd2	Up regulation
ENSMUSG00000029613.16	1185.02	0.458534	0.209127	0.00794519	0.0340616	Eif2ak1	Up regulation
ENSMUSG00000029614.14	2561.69	0.526848	0.139151	3.07502e-05	0.000313586	Rpl6	Up regulation
ENSMUSG00000029623.15	1860.23	0.286965	0.10705	0.00461412	0.0219398	Pdap1	Up regulation
ENSMUSG00000029624.11	400.548	0.37346	0.102829	0.000127999	0.00108044	Ptcd1	Up regulation
ENSMUSG00000029629.18	1480.36	0.312931	0.0732473	1.14755e-05	0.000133895	Phf14	Up regulation
ENSMUSG00000029650.11	131.183	0.533175	0.228455	0.00382156	0.018835	Slc46a3	Up regulation
ENSMUSG00000029651.17	31.6447	1.18268	0.543146	0.000822117	0.00524704	Mtus2	Up regulation
ENSMUSG00000029681.13	563.036	0.322898	0.124955	0.0053225	0.0246383	Bcl7b	Up regulation
ENSMUSG00000029684.15	905.522	0.144965	0.0525299	0.00519425	0.0242043	Wasl	Up regulation
ENSMUSG00000029686.16	1931.21	0.639289	0.132625	1.51411e-07	2.90244e-06	Cul1	Up regulation
ENSMUSG00000029705.18	3947.81	0.467757	0.149465	0.000484719	0.00336958	Cux1	Up regulation
ENSMUSG00000029755.11	1.66477	0.746943	0.90567	0.00724396	0.0316117	Dlx5	Up regulation
ENSMUSG00000029769.18	738.925	1.42794	0.277739	1.31339e-08	3.29572e-07	Ccdc136	Up regulation
ENSMUSG00000029777.11	2107.35	0.529092	0.112759	5.36115e-07	8.82846e-06	Gars1	Up regulation
ENSMUSG00000029804.18	1467.52	0.457381	0.159906	0.0012286	0.00731973	Herc3	Up regulation
ENSMUSG00000029810.16	383.768	0.573014	0.160272	5.4525e-05	0.000511031	Tmem176b	Up regulation
ENSMUSG00000029815.13	697.438	0.401206	0.181836	0.0101906	0.0415623	Malsu1	Up regulation
ENSMUSG00000029816.11	107.333	1.56953	0.31073	1.81126e-08	4.42046e-07	Gpnmb	Up regulation
ENSMUSG00000029823.17	7446.09	0.288857	0.122326	0.0111944	0.0448835	Luc7l2	Up regulation
ENSMUSG00000029843.5	7.08047	1.0951	0.580861	0.00192031	0.0106354	Slc13a4	Up regulation
ENSMUSG00000029875.6	5.88748	2.88805	0.73096	7.59474e-08	1.58404e-06	Ccdc184	Up regulation
ENSMUSG00000029993.17	771.237	0.471212	0.148452	0.000408771	0.00290688	Nfu1	Up regulation
ENSMUSG00000029994.18	523.51	0.687829	0.373675	0.00699696	0.0307364	Anxa4	Up regulation
ENSMUSG00000030007.9	2710.03	0.637762	0.125323	3.80485e-08	8.63482e-07	Cct7	Up regulation
ENSMUSG00000030016.16	2669.69	0.438918	0.125818	0.000158523	0.00129951	Zfp638	Up regulation
ENSMUSG00000030051.11	168.995	0.291992	0.12468	0.0116467	0.0464017	Aplf	Up regulation
ENSMUSG00000030057.16	11890	0.799729	0.15915	2.77473e-08	6.51329e-07	Cnbp	Up regulation
ENSMUSG00000030079.16	484.346	0.610494	0.126542	1.73214e-07	3.2718e-06	Ruvbl1	Up regulation
ENSMUSG00000030083.12	563.373	0.554925	0.096764	1.65243e-09	5.05537e-08	Abtb1	Up regulation
ENSMUSG00000030087.12	1396.72	2.09371	0.111519	2.0571e-80	2.65582e-76	Klf15	Up regulation
ENSMUSG00000030094.9	725.926	0.597454	0.0976295	1.22372e-10	4.70204e-09	Xpc	Up regulation
ENSMUSG00000030095.11	736.612	0.384964	0.153174	0.00492407	0.0231846	Tmem43	Up regulation
ENSMUSG00000030096.9	3524.92	0.532093	0.13587	1.75479e-05	0.000193222	Slc6a6	Up regulation
ENSMUSG00000030105.9	2431.39	0.632052	0.164648	1.4043e-05	0.000159826	Arl8b	Up regulation
ENSMUSG00000030126.18	2248.85	0.5045	0.214998	0.00425094	0.0205396	Tmcc1	Up regulation
ENSMUSG00000030138.9	1843.92	0.282948	0.110447	0.00660042	0.0292935	Bms1	Up regulation
ENSMUSG00000030144.5	5.22429	0.868621	0.561967	0.00715307	0.0312831	Clec4d	Up regulation
ENSMUSG00000030157.6	2203.13	0.608751	0.256531	0.00242821	0.0129223	Clec2d	Up regulation
ENSMUSG00000030166.15	279.702	0.470367	0.114086	1.04033e-05	0.000122828	Rad52	Up regulation
ENSMUSG00000030168.14	2854.17	0.489788	0.187565	0.00219265	0.0118917	Adipor2	Up regulation
ENSMUSG00000030172.16	2998.97	0.33343	0.113544	0.00175995	0.00989624	Erc1	Up regulation
ENSMUSG00000030177.15	281.196	0.330269	0.118473	0.00283465	0.0146387	Ccdc77	Up regulation
ENSMUSG00000030189.16	19599.4	1.36362	0.239144	6.56761e-10	2.1658e-08	Ybx3	Up regulation
ENSMUSG00000030201.16	3811.41	0.345885	0.145129	0.0083849	0.0355478	Lrp6	Up regulation
ENSMUSG00000030203.18	1006.63	0.460357	0.108054	6.01346e-06	7.62266e-05	Dusp16	Up regulation
ENSMUSG00000030213.13	2989.85	0.521938	0.0911827	2.15513e-09	6.40364e-08	Atf7ip	Up regulation
ENSMUSG00000030216.13	1317.95	0.3	0.0982014	0.00136596	0.00801238	Wbp11	Up regulation
ENSMUSG00000030224.11	2608.9	0.520775	0.171808	0.00050579	0.00349385	Strap	Up regulation
ENSMUSG00000030232.20	1374.3	0.437577	0.106754	1.3828e-05	0.000157569	Aebp2	Up regulation
ENSMUSG00000030269.15	520.271	0.854385	0.142471	9.61506e-11	3.77311e-09	Mtmr14	Up regulation
ENSMUSG00000030278.12	47.8487	1.01363	0.522413	0.00214334	0.0116807	Cidec	Up regulation
ENSMUSG00000030283.8	32.0258	2.02145	0.708885	2.05627e-05	0.000220585	St8sia1	Up regulation
ENSMUSG00000030286.7	860.241	0.354717	0.115079	0.000999569	0.00615547	Emc3	Up regulation
ENSMUSG00000030304.12	1428.65	0.363009	0.149086	0.00676269	0.0299006	Ergic2	Up regulation
ENSMUSG00000030317.9	558.196	0.989641	0.311014	6.26846e-05	0.000577445	Timp4	Up regulation
ENSMUSG00000030401.17	6852.42	0.538599	0.271359	0.00898299	0.0374777	Rtn2	Up regulation
ENSMUSG00000030409.17	6207.92	0.616533	0.162803	1.87738e-05	0.000204447	Dmpk	Up regulation
ENSMUSG00000030410.17	817.735	0.662094	0.225873	0.000353774	0.00257313	Dmwd	Up regulation
ENSMUSG00000030417.16	1433.84	0.616766	0.181228	8.32271e-05	0.000744632	Pdcd5	Up regulation
ENSMUSG00000030421.10	1016.88	0.823273	0.126395	3.67331e-12	1.85614e-10	Uri1	Up regulation
ENSMUSG00000030431.9	89.3976	0.408773	0.163024	0.00445513	0.0213277	Tmem238	Up regulation
ENSMUSG00000030432.13	1127.48	0.357121	0.11718	0.0011093	0.00670959	Rpl28	Up regulation
ENSMUSG00000030433.16	1306.29	0.542992	0.238089	0.00420035	0.0203447	Sbk2	Up regulation
ENSMUSG00000030470.16	12423.5	0.972681	0.708746	0.00602957	0.0272709	Csrp3	Up regulation
ENSMUSG00000030521.12	679.433	0.377149	0.136087	0.00241896	0.0128916	Mphosph10	Up regulation
ENSMUSG00000030530.16	1784.98	0.555147	0.169086	0.000176966	0.00142261	Furin	Up regulation
ENSMUSG00000030557.18	4651.91	0.388526	0.156725	0.00531938	0.024632	Mef2a	Up regulation
ENSMUSG00000030591.18	3478.75	0.947681	0.134324	7.77754e-14	5.38402e-12	Psmd8	Up regulation
ENSMUSG00000030592.20	201790	0.994282	0.274486	1.23719e-05	0.000143382	Ryr1	Up regulation
ENSMUSG00000030595.16	598.453	0.938555	0.130976	3.48713e-14	2.55799e-12	Nfkbib	Up regulation
ENSMUSG00000030598.16	90.2776	0.872776	0.25672	3.47874e-05	0.000346679	Fbxo17	Up regulation
ENSMUSG00000030603.17	1747.72	0.429008	0.12774	0.00026856	0.00203298	Psmc4	Up regulation
ENSMUSG00000030655.16	5278.86	0.672399	0.147195	4.44907e-07	7.48888e-06	Smg1	Up regulation
ENSMUSG00000030662.11	7051.91	0.964123	0.235254	1.81475e-06	2.62661e-05	Ipo5	Up regulation
ENSMUSG00000030701.18	682.702	0.756459	0.401452	0.00503689	0.0235911	Plekhb1	Up regulation
ENSMUSG00000030732.14	49.5565	0.701585	0.242756	0.000346139	0.00252334	Chrdl2	Up regulation
ENSMUSG00000030738.12	7013.3	0.71667	0.0877011	2.05873e-17	2.54347e-15	Eif3c	Up regulation
ENSMUSG00000030739.20	3939.71	0.737073	0.375849	0.00445191	0.0213191	Myh14	Up regulation
ENSMUSG00000030744.14	4103.86	0.577015	0.170227	0.000107211	0.000928958	Rps3	Up regulation
ENSMUSG00000030750.14	258.965	0.418099	0.130674	0.000496488	0.00344341	Nsmce1	Up regulation
ENSMUSG00000030753.16	3702.41	0.812687	0.192681	1.3715e-06	2.03526e-05	Thap12	Up regulation
ENSMUSG00000030801.11	462.815	0.506402	0.157879	0.000300773	0.00223168	Kat8	Up regulation
ENSMUSG00000030814.18	408.055	0.411231	0.184589	0.00919989	0.038243	Bcl7c	Up regulation
ENSMUSG00000030826.20	737.1	0.43012	0.122895	0.000159194	0.00130411	Bcat2	Up regulation
ENSMUSG00000030835.7	2412.55	0.806353	0.165664	6.16852e-08	1.31417e-06	Nomo1	Up regulation
ENSMUSG00000030852.19	44278.9	1.08183	0.133214	2.46054e-17	2.98279e-15	Tacc2	Up regulation
ENSMUSG00000030861.16	2701.5	0.792102	0.173252	2.7788e-07	4.96893e-06	Acadsb	Up regulation
ENSMUSG00000030876.8	585.009	0.436103	0.208584	0.0113758	0.045491	Mettl9	Up regulation
ENSMUSG00000030880.15	402.298	0.481122	0.106537	1.65571e-06	2.41265e-05	Polr3e	Up regulation
ENSMUSG00000030905.6	83.1596	1.28704	0.2503	1.32834e-08	3.32678e-07	Crym	Up regulation
ENSMUSG00000030917.14	283.192	0.83252	0.496687	0.00630577	0.028248	Ldaf1	Up regulation
ENSMUSG00000030935.16	6.80425	0.962047	0.678128	0.00606721	0.0274171	Acsm3	Up regulation
ENSMUSG00000030942.9	792.022	0.447067	0.121676	7.48595e-05	0.000677039	Thumpd1	Up regulation
ENSMUSG00000030965.20	737.716	0.528242	0.172385	0.000435221	0.00307113	Abraxas2	Up regulation
ENSMUSG00000030967.16	2748.65	0.868245	0.215562	2.80349e-06	3.87728e-05	Zranb1	Up regulation
ENSMUSG00000030972.7	5.59149	0.988667	0.77258	0.00576206	0.026231	Acsm5	Up regulation
ENSMUSG00000030986.14	1643.57	0.470132	0.198899	0.00482603	0.0227789	Dhx32	Up regulation
ENSMUSG00000030987.6	7099.33	0.512902	0.16057	0.000303937	0.00225322	Stim1	Up regulation
ENSMUSG00000030996.9	4103.51	0.49062	0.146324	0.000196253	0.00155442	Art1	Up regulation
ENSMUSG00000031026.16	23.1997	1.64838	0.318638	8.72337e-09	2.27982e-07	Trim66	Up regulation
ENSMUSG00000031029.7	2083.3	0.740091	0.114589	6.70981e-12	3.23087e-10	Eif3f	Up regulation
ENSMUSG00000031065.15	2898.81	0.348669	0.153112	0.0109109	0.0439517	Cdk16	Up regulation
ENSMUSG00000031068.9	1728.88	0.593586	0.205963	0.000566604	0.00383393	Glrx3	Up regulation
ENSMUSG00000031095.16	558.009	0.472481	0.101941	9.87403e-07	1.5176e-05	Cul4b	Up regulation
ENSMUSG00000031133.13	2067.9	0.360704	0.145398	0.00603206	0.0272729	Arhgef6	Up regulation
ENSMUSG00000031137.18	571.294	0.481921	0.226378	0.0082887	0.0352115	Fgf13	Up regulation
ENSMUSG00000031145.16	507.782	0.292957	0.125386	0.0117734	0.0467867	Prickle3	Up regulation
ENSMUSG00000031146.7	267.042	0.723951	0.341936	0.00312988	0.0159245	Plp2	Up regulation
ENSMUSG00000031167.17	1080.39	0.802619	0.225755	2.2689e-05	0.0002403	Rbm3	Up regulation
ENSMUSG00000031174.18	113.213	0.420422	0.186475	0.00821939	0.0349527	Rpgr	Up regulation
ENSMUSG00000031204.4	441.988	0.773015	0.252926	0.000154705	0.00127299	Asb12	Up regulation
ENSMUSG00000031221.8	1171.03	0.577892	0.148715	1.53741e-05	0.000172522	Igbp1	Up regulation
ENSMUSG00000031309.16	2349.63	0.447815	0.186018	0.00480846	0.0227107	Rps6ka3	Up regulation
ENSMUSG00000031320.10	3287.73	0.601895	0.152337	1.02841e-05	0.000121532	Rps4x	Up regulation
ENSMUSG00000031371.15	207.838	0.315615	0.132482	0.009553	0.0394227	Haus7	Up regulation
ENSMUSG00000031379.14	105.828	0.80104	0.199952	3.5888e-06	4.83392e-05	Pir	Up regulation
ENSMUSG00000031380.11	158.699	0.724973	0.32169	0.00216705	0.011785	Vegfd	Up regulation
ENSMUSG00000031382.15	1809.37	1.5063	0.256777	2.42158e-10	8.70858e-09	Asb11	Up regulation
ENSMUSG00000031393.18	1823.48	0.756549	0.0977794	5.94156e-16	5.68211e-14	Mecp2	Up regulation
ENSMUSG00000031399.16	313.738	0.550546	0.107991	5.98172e-08	1.28284e-06	Fam3a	Up regulation
ENSMUSG00000031410.15	1.50797	0.841688	0.828147	0.00934518	0.0387136	Nxf7	Up regulation
ENSMUSG00000031425.16	145.946	0.939713	0.320411	0.000158148	0.00129718	Plp1	Up regulation
ENSMUSG00000031431.14	3497.4	0.859313	0.293593	0.000190526	0.00151698	Tsc22d3	Up regulation
ENSMUSG00000031432.4	453.941	0.479241	0.226435	0.0086552	0.0363894	Prps1	Up regulation
ENSMUSG00000031446.15	2967.38	0.420516	0.102861	1.58495e-05	0.000177318	Cul4a	Up regulation
ENSMUSG00000031447.8	7016.05	0.539937	0.116941	7.23739e-07	1.15143e-05	Lamp1	Up regulation
ENSMUSG00000031450.9	5.34651	1.18622	0.654609	0.0016705	0.00948833	Grk1	Up regulation
ENSMUSG00000031451.7	2118.98	0.653782	0.154986	2.46972e-06	3.46391e-05	Gas6	Up regulation
ENSMUSG00000031490.7	1452.92	1.72608	0.12548	2.74142e-44	4.71908e-41	Eif4ebp1	Up regulation
ENSMUSG00000031508.15	899.124	0.425939	0.187187	0.00758355	0.0327888	Ankrd10	Up regulation
ENSMUSG00000031516.12	459.4	0.33151	0.132701	0.00653665	0.0290543	Dctn6	Up regulation
ENSMUSG00000031519.5	2667.06	0.731538	0.154032	1.42078e-07	2.74184e-06	Asb5	Up regulation
ENSMUSG00000031529.6	1306.37	0.352797	0.0828668	1.04546e-05	0.000123377	Tnks	Up regulation
ENSMUSG00000031534.16	334.749	0.481946	0.1272	3.92387e-05	0.000384948	Smim19	Up regulation
ENSMUSG00000031536.7	1420.73	0.466798	0.152937	0.000630846	0.00419929	Polb	Up regulation
ENSMUSG00000031545.7	1182.95	0.393431	0.127815	0.000846311	0.00536524	Gpat4	Up regulation
ENSMUSG00000031556.7	368.612	0.548692	0.184969	0.000539985	0.0036863	Tm2d2	Up regulation
ENSMUSG00000031561.17	1287.23	0.644704	0.244453	0.00096644	0.00597855	Tenm3	Up regulation
ENSMUSG00000031565.20	2494.49	0.350272	0.145184	0.00760551	0.0328672	Fgfr1	Up regulation
ENSMUSG00000031575.19	966.503	0.342335	0.115114	0.00150426	0.00867578	Ash2l	Up regulation
ENSMUSG00000031577.11	202.686	0.318268	0.107188	0.0016855	0.009563	Tti2	Up regulation
ENSMUSG00000031584.17	742.484	0.607546	0.135073	8.6707e-07	1.34742e-05	Gsr	Up regulation
ENSMUSG00000031590.9	539.729	0.417948	0.0883941	8.45605e-07	1.32009e-05	Frg1	Up regulation
ENSMUSG00000031596.16	2486.48	0.674716	0.390958	0.00949468	0.0392075	Slc7a2	Up regulation
ENSMUSG00000031603.15	1.76228	1.29125	0.932884	0.00145881	0.00844949	Fgf20	Up regulation
ENSMUSG00000031608.14	273.737	0.5281	0.240145	0.00556808	0.0255415	Galnt7	Up regulation
ENSMUSG00000031609.4	380.212	0.467933	0.207842	0.00653738	0.0290543	Sap30	Up regulation
ENSMUSG00000031617.17	241.48	0.521465	0.161984	0.000265985	0.00201703	Tmem184c	Up regulation
ENSMUSG00000031628.10	176.281	0.852812	0.326206	0.000524664	0.00360014	Casp3	Up regulation
ENSMUSG00000031631.16	511.88	0.372463	0.143254	0.00409203	0.0199208	Cfap97	Up regulation
ENSMUSG00000031636.8	9109.03	1.0224	0.297266	2.39394e-05	0.000251583	Pdlim3	Up regulation
ENSMUSG00000031666.16	2302.23	1.18222	0.147429	6.62612e-17	7.40662e-15	Rbl2	Up regulation
ENSMUSG00000031671.12	189.945	0.433457	0.124617	0.000169481	0.00137067	Setd6	Up regulation
ENSMUSG00000031696.10	2193.99	0.468533	0.150483	0.000509468	0.00351461	Vps35	Up regulation
ENSMUSG00000031701.7	5247.82	0.486727	0.207991	0.00472472	0.0223725	Dnaja2	Up regulation
ENSMUSG00000031711.8	563.744	0.287094	0.0714148	3.76499e-05	0.0003717	Zfp330	Up regulation
ENSMUSG00000031714.11	1244.69	0.390856	0.0991565	3.41273e-05	0.000341286	Gab1	Up regulation
ENSMUSG00000031715.15	2070.38	0.37983	0.135679	0.0021933	0.0118928	Smarca5	Up regulation
ENSMUSG00000031722.11	78.0475	1.13016	0.531973	0.0010545	0.00642476	Hp	Up regulation
ENSMUSG00000031725.9	6.7478	1.77426	0.614075	3.66889e-05	0.000363117	Ces1f	Up regulation
ENSMUSG00000031728.11	240.192	0.567008	0.203109	0.000859298	0.00543156	Zfp821	Up regulation
ENSMUSG00000031729.7	926.744	0.273516	0.0982779	0.00355344	0.0177028	Ist1	Up regulation
ENSMUSG00000031731.17	1570.02	0.277296	0.0820255	0.00047847	0.00333485	Ap1g1	Up regulation
ENSMUSG00000031751.15	2625.99	0.423468	0.168041	0.00399701	0.0195511	Amfr	Up regulation
ENSMUSG00000031762.8	152.075	3.44303	0.271978	1.00104e-39	1.03392e-36	Mt2	Up regulation
ENSMUSG00000031765.9	638.673	2.14788	0.195751	7.11689e-30	3.46727e-27	Mt1	Up regulation
ENSMUSG00000031770.17	2092.75	0.545054	0.164474	0.000167435	0.00135826	Herpud1	Up regulation
ENSMUSG00000031775.6	37.1181	0.781072	0.456593	0.00689648	0.0303881	Pllp	Up regulation
ENSMUSG00000031776.18	1114.48	0.347221	0.153501	0.0114135	0.0456096	Arl2bp	Up regulation
ENSMUSG00000031778.14	308.056	1.36411	0.417391	2.95887e-05	0.000303178	Cx3cl1	Up regulation
ENSMUSG00000031780.3	5.15251	2.10678	0.852059	3.3969e-05	0.000339975	Ccl17	Up regulation
ENSMUSG00000031783.11	1132.79	0.525114	0.127879	8.16116e-06	9.94945e-05	Polr2c	Up regulation
ENSMUSG00000031791.9	19291.1	0.525448	0.15254	0.000115814	0.000991976	Tmem38a	Up regulation
ENSMUSG00000031808.8	2324.18	0.453947	0.175738	0.00286328	0.0147571	Slc27a1	Up regulation
ENSMUSG00000031812.17	2547.59	0.742577	0.161286	2.78788e-07	4.98171e-06	Map1lc3b	Up regulation
ENSMUSG00000031822.21	1789.85	0.433825	0.149595	0.00122732	0.00731425	Gse1	Up regulation
ENSMUSG00000031835.17	1800.08	0.272916	0.0730021	0.000124965	0.00105829	Mbtps1	Up regulation
ENSMUSG00000031878.19	645.937	0.325264	0.127608	0.00582348	0.0264732	Nae1	Up regulation
ENSMUSG00000031880.8	596.92	1.1885	0.745412	0.00219748	0.0119104	Rrad	Up regulation
ENSMUSG00000031904.6	245.271	0.505906	0.154139	0.000232237	0.0017927	Slc7a6	Up regulation
ENSMUSG00000031913.10	1667.58	0.570623	0.161064	6.25307e-05	0.000576439	Vps4a	Up regulation
ENSMUSG00000031934.15	246.967	0.695125	0.303495	0.00217151	0.011798	Panx1	Up regulation
ENSMUSG00000031948.15	2213.92	0.850841	0.133315	8.34282e-12	3.94954e-10	Kars1	Up regulation
ENSMUSG00000031950.8	756.003	0.451196	0.0861121	5.04897e-08	1.10296e-06	Gabarapl2	Up regulation
ENSMUSG00000031962.7	632.039	0.668593	0.146871	4.88808e-07	8.1429e-06	Cdh15	Up regulation
ENSMUSG00000031967.16	875.687	0.314292	0.129599	0.00856456	0.0361229	Afg3l1	Up regulation
ENSMUSG00000031970.18	2.83853	1.83015	1.11985	0.000162624	0.00132674	Dbndd1	Up regulation
ENSMUSG00000031972.6	707206	0.358134	0.158831	0.0110667	0.0444753	Acta1	Up regulation
ENSMUSG00000031985.10	2896	0.661365	0.157555	2.61118e-06	3.64057e-05	Gnpat	Up regulation
ENSMUSG00000031987.7	7052.75	0.338022	0.14884	0.0116148	0.0463103	Egln1	Up regulation
ENSMUSG00000031993.8	1317.97	0.252383	0.0805604	0.0012311	0.00732957	Snx19	Up regulation
ENSMUSG00000032002.11	1909.57	0.340304	0.0870878	4.93648e-05	0.000468793	Dcun1d5	Up regulation
ENSMUSG00000032009.9	1330.78	0.417595	0.137909	0.000884543	0.00556389	Sesn3	Up regulation
ENSMUSG00000032010.16	6012.8	0.810736	0.244876	5.6008e-05	0.00052341	Usp2	Up regulation
ENSMUSG00000032050.19	7771.32	0.572431	0.201228	0.000707999	0.00462115	Rdx	Up regulation
ENSMUSG00000032062.4	102.523	0.724577	0.386767	0.00572567	0.0261174	2310030G06Rik	Up regulation
ENSMUSG00000032078.18	656.859	0.753636	0.103076	1.57216e-14	1.23389e-12	Zpr1	Up regulation
ENSMUSG00000032097.11	3455.59	0.304545	0.110582	0.00347618	0.0173748	Ddx6	Up regulation
ENSMUSG00000032122.16	59.0569	0.595686	0.237065	0.00173217	0.00977913	Slc37a2	Up regulation
ENSMUSG00000032127.10	673.906	0.545915	0.094786	1.50968e-09	4.64066e-08	Vps11	Up regulation
ENSMUSG00000032202.12	96.251	0.821394	0.262574	0.000104987	0.00091233	Rab27a	Up regulation
ENSMUSG00000032216.16	17805.5	0.48272	0.090714	2.69832e-08	6.36868e-07	Nedd4	Up regulation
ENSMUSG00000032238.18	4579.3	1.13107	0.293415	4.50073e-06	5.90515e-05	Rora	Up regulation
ENSMUSG00000032245.13	228.954	1.10581	0.132659	4.29579e-18	5.77717e-16	Cln6	Up regulation
ENSMUSG00000032253.14	3291.8	0.725562	0.115604	2.34038e-11	1.02949e-09	Phip	Up regulation
ENSMUSG00000032262.14	6.9821	1.20276	0.569451	0.000902491	0.00565475	Elovl4	Up regulation
ENSMUSG00000032263.15	541.776	0.839145	0.140868	1.26085e-10	4.82506e-09	Bckdhb	Up regulation
ENSMUSG00000032267.9	3492.7	1.22848	0.349566	1.51371e-05	0.000170307	Usp28	Up regulation
ENSMUSG00000032288.10	302.25	0.373911	0.109947	0.000302989	0.00224748	Imp3	Up regulation
ENSMUSG00000032299.11	220.921	0.334064	0.105069	0.000787167	0.00505859	Commd4	Up regulation
ENSMUSG00000032301.14	2485.76	0.517987	0.157954	0.000219496	0.00171072	Psma4	Up regulation
ENSMUSG00000032307.17	1103.15	0.61567	0.159543	1.40446e-05	0.000159826	Ube2q2	Up regulation
ENSMUSG00000032309.16	650.987	0.272842	0.113833	0.0107781	0.0435526	Fbxo22	Up regulation
ENSMUSG00000032324.12	2289.33	0.646414	0.258262	0.00143143	0.00832082	Tspan3	Up regulation
ENSMUSG00000032340.9	1571.09	0.602705	0.135282	1.08877e-06	1.65566e-05	Neo1	Up regulation
ENSMUSG00000032350.10	388.209	0.553014	0.135568	7.81311e-06	9.5794e-05	Gclc	Up regulation
ENSMUSG00000032355.17	2936.59	1.3523	0.197225	4.68148e-13	2.74106e-11	Mlip	Up regulation
ENSMUSG00000032380.10	1366.95	1.5956	0.104979	2.89109e-53	1.06644e-49	Dapk2	Up regulation
ENSMUSG00000032386.16	683.885	0.261808	0.0968549	0.00469721	0.0222544	Trip4	Up regulation
ENSMUSG00000032394.7	27.9401	1.21279	0.826906	0.00214253	0.0116788	Igdcc3	Up regulation
ENSMUSG00000032399.9	10122.7	0.788606	0.119472	2.21569e-12	1.16047e-10	Rpl4	Up regulation
ENSMUSG00000032407.15	1908.06	0.348551	0.110137	0.000778646	0.00501382	U2surp	Up regulation
ENSMUSG00000032410.14	1367.7	0.290622	0.124683	0.0120495	0.0477121	Xrn1	Up regulation
ENSMUSG00000032411.16	2172.5	1.61146	0.277254	2.91221e-10	1.02727e-08	Tfdp2	Up regulation
ENSMUSG00000032423.14	2390.48	0.389827	0.1004	4.3748e-05	0.00042403	Syncrip	Up regulation
ENSMUSG00000032425.16	275.709	0.69224	0.204589	6.36647e-05	0.000583629	Zfp949	Up regulation
ENSMUSG00000032435.10	1580.41	0.507112	0.17872	0.00101371	0.0062277	Dync1li1	Up regulation
ENSMUSG00000032437.11	3153.69	0.749695	0.183124	2.87204e-06	3.96572e-05	Stt3b	Up regulation
ENSMUSG00000032449.14	1279.41	0.995808	0.175605	6.30866e-10	2.09647e-08	Slc25a36	Up regulation
ENSMUSG00000032478.15	212.942	0.48743	0.160454	0.000592006	0.00397767	Nme6	Up regulation
ENSMUSG00000032479.16	34177	0.950446	0.184046	1.06518e-08	2.72763e-07	Map4	Up regulation
ENSMUSG00000032481.18	1482.17	0.334901	0.0908928	0.000123464	0.00104763	Smarcc1	Up regulation
ENSMUSG00000032485.15	625.821	0.546948	0.152936	6.26231e-05	0.000577084	Scap	Up regulation
ENSMUSG00000032495.9	3313.69	0.95235	0.310795	9.96297e-05	0.000872047	Lrrc2	Up regulation
ENSMUSG00000032496.8	8.83044	0.861384	0.665425	0.0100628	0.0411077	Ltf	Up regulation
ENSMUSG00000032497.20	3497.4	0.543379	0.0984577	6.20121e-09	1.67666e-07	Lrrfip2	Up regulation
ENSMUSG00000032518.7	12985.6	0.397744	0.118326	0.000311558	0.0022985	Rpsa	Up regulation
ENSMUSG00000032519.12	275.11	0.468715	0.13572	0.00015352	0.00126485	Slc25a38	Up regulation
ENSMUSG00000032523.12	1905.04	0.517149	0.201539	0.00217172	0.011798	Hhatl	Up regulation
ENSMUSG00000032527.14	1384.33	0.39302	0.135999	0.00155656	0.00893552	Pccb	Up regulation
ENSMUSG00000032530.15	22.8064	2.93276	0.642465	5.73836e-09	1.56463e-07	Lyzl4	Up regulation
ENSMUSG00000032532.8	7.68766	0.837556	0.630912	0.0107859	0.0435636	Cck	Up regulation
ENSMUSG00000032565.10	80.7871	1.48408	0.243423	6.25913e-11	2.54916e-09	Nudt16	Up regulation
ENSMUSG00000032570.18	1160.03	0.57052	0.0940771	2.03472e-10	7.38938e-09	Atp2c1	Up regulation
ENSMUSG00000032601.14	6367.41	0.489195	0.194311	0.00287451	0.0147854	Prkar2a	Up regulation
ENSMUSG00000032604.17	1272.93	0.469896	0.12168	3.12672e-05	0.00031773	Qars1	Up regulation
ENSMUSG00000032612.15	2374.86	0.346463	0.155499	0.0124732	0.0490063	Usp4	Up regulation
ENSMUSG00000032633.13	1128.09	0.495299	0.0937909	3.12533e-08	7.23575e-07	Flcn	Up regulation
ENSMUSG00000032641.19	69.6051	0.504084	0.156707	0.000295027	0.00219346	Gpr19	Up regulation
ENSMUSG00000032643.13	5154.03	1.04059	0.197552	6.11074e-09	1.65915e-07	Fhl3	Up regulation
ENSMUSG00000032652.14	306.033	0.541255	0.189479	0.000798666	0.00512611	Crebl2	Up regulation
ENSMUSG00000032666.17	2265.7	0.965057	0.203581	9.30746e-08	1.89683e-06	1700025G04Rik	Up regulation
ENSMUSG00000032667.18	717.473	0.740715	0.251098	0.000246658	0.0018899	Pon2	Up regulation
ENSMUSG00000032745.19	831.646	0.492146	0.132206	4.8234e-05	0.000459746	Gpbp1	Up regulation
ENSMUSG00000032788.16	353.027	0.266563	0.106871	0.00843695	0.0357132	Pdxk	Up regulation
ENSMUSG00000032802.9	737.239	0.490685	0.218417	0.00591157	0.0268076	Srxn1	Up regulation
ENSMUSG00000032807.6	3.98779	1.39981	0.955221	0.000941253	0.00585641	Alox12b	Up regulation
ENSMUSG00000032816.17	1897.04	0.556273	0.276657	0.0078081	0.0335854	Igdcc4	Up regulation
ENSMUSG00000032834.12	436.953	0.401743	0.116225	0.000216127	0.00168752	Pwp2	Up regulation
ENSMUSG00000032845.17	5132.26	0.937061	0.216258	6.56184e-07	1.055e-05	Alpk2	Up regulation
ENSMUSG00000032867.9	1176.07	0.530693	0.197717	0.00143327	0.00832775	Fbxw8	Up regulation
ENSMUSG00000032883.16	566.053	0.79852	0.252006	9.6819e-05	0.000851197	Acsl3	Up regulation
ENSMUSG00000032897.18	1296.33	0.303353	0.110149	0.00349191	0.0174366	Nfyc	Up regulation
ENSMUSG00000032899.15	9.47121	1.27128	0.452478	0.000135535	0.00113809	Styk1	Up regulation
ENSMUSG00000032998.17	1300.27	0.501367	0.100941	1.59247e-07	3.03239e-06	Foxj3	Up regulation
ENSMUSG00000033004.17	6934.6	0.781305	0.212729	1.51656e-05	0.000170479	Mycbp2	Up regulation
ENSMUSG00000033014.13	799.265	0.39187	0.0831992	1.05407e-06	1.61095e-05	Trim33	Up regulation
ENSMUSG00000033022.9	38.0867	1.52758	0.425841	8.15727e-06	9.94941e-05	Cdo1	Up regulation
ENSMUSG00000033039.11	1682.6	1.27021	0.384004	2.94095e-05	0.000301702	Micall1	Up regulation
ENSMUSG00000033047.6	1497.05	0.617192	0.161618	1.64325e-05	0.000182339	Eif3l	Up regulation
ENSMUSG00000033060.18	6582.67	0.659477	0.155737	2.23383e-06	3.1727e-05	Lmo7	Up regulation
ENSMUSG00000033102.16	288.125	0.436777	0.184218	0.00560298	0.0256424	Cdc14b	Up regulation
ENSMUSG00000033105.13	139.348	0.868253	0.143808	7.33379e-11	2.94503e-09	Lss	Up regulation
ENSMUSG00000033124.17	1163.77	0.638629	0.244262	0.00106231	0.00646475	Atg9a	Up regulation
ENSMUSG00000033152.14	852.793	0.429624	0.181998	0.00596978	0.0270574	Podxl2	Up regulation
ENSMUSG00000033166.12	694.038	0.522018	0.129993	1.22468e-05	0.000141995	Dis3	Up regulation
ENSMUSG00000033228.9	3446.67	0.380896	0.0777805	4.37317e-07	7.38037e-06	Scaf11	Up regulation
ENSMUSG00000033237.20	1461.26	0.3133	0.0656786	1.09622e-06	1.66405e-05	Arid2	Up regulation
ENSMUSG00000033294.12	236.081	0.309378	0.118778	0.00529638	0.024557	Noc4l	Up regulation
ENSMUSG00000033307.8	669.459	0.469747	0.150445	0.000491262	0.003409	Mif	Up regulation
ENSMUSG00000033319.6	744.162	0.433415	0.117232	7.36765e-05	0.000667275	Fem1c	Up regulation
ENSMUSG00000033323.15	763.124	0.707115	0.34163	0.00374288	0.0184825	Ctdp1	Up regulation
ENSMUSG00000033326.16	1309.12	0.346516	0.103083	0.000394637	0.00282035	Kdm4a	Up regulation
ENSMUSG00000033365.15	4474.29	0.950595	0.129478	9.55551e-15	7.73457e-13	Ipo13	Up regulation
ENSMUSG00000033373.17	276.522	0.564872	0.10744	2.33288e-08	5.58787e-07	Fntb	Up regulation
ENSMUSG00000033416.16	1712.39	1.46017	0.142715	1.22409e-25	4.15884e-23	Gucd1	Up regulation
ENSMUSG00000033417.17	1220.71	0.424914	0.0969466	4.19292e-06	5.56049e-05	Cacul1	Up regulation
ENSMUSG00000033423.17	1338.82	0.421586	0.118912	0.000140385	0.00117234	Eri3	Up regulation
ENSMUSG00000033444.15	3027.12	0.569248	0.0866924	7.9647e-12	3.7944e-10	Specc1l	Up regulation
ENSMUSG00000033458.18	297.21	0.313936	0.123696	0.00628715	0.0282048	Fan1	Up regulation
ENSMUSG00000033486.15	88.1664	0.460121	0.202609	0.00646558	0.0287899	Catsper2	Up regulation
ENSMUSG00000033502.16	1382.63	0.685953	0.294708	0.00202507	0.0111301	Cdc14a	Up regulation
ENSMUSG00000033543.18	691.372	0.580829	0.15363	2.32578e-05	0.000245318	Gtf2a2	Up regulation
ENSMUSG00000033565.20	3608.03	0.363474	0.165022	0.0123049	0.048543	Rbfox2	Up regulation
ENSMUSG00000033579.17	32.6932	0.943444	0.566295	0.00455444	0.0217015	Fa2h	Up regulation
ENSMUSG00000033623.14	1798.31	0.506865	0.189255	0.00164894	0.00938428	Pcgf3	Up regulation
ENSMUSG00000033629.7	399.113	0.411421	0.0932522	3.93766e-06	5.25448e-05	Hacd3	Up regulation
ENSMUSG00000033633.16	22.3657	1.08695	0.345127	6.16424e-05	0.000569005	Clec18a	Up regulation
ENSMUSG00000033644.6	47.9486	0.515328	0.237169	0.00632379	0.0283189	Piwil2	Up regulation
ENSMUSG00000033671.19	5138.91	0.620339	0.108149	1.11268e-09	3.52521e-08	Cep350	Up regulation
ENSMUSG00000033713.13	7163.01	0.444023	0.114796	3.51614e-05	0.000349866	Foxn3	Up regulation
ENSMUSG00000033731.11	3.68471	2.50224	1.13651	1.31703e-05	0.000150981	3300002A11Rik	Up regulation
ENSMUSG00000033737.15	80.708	0.764644	0.324295	0.00142751	0.00830733	Fndc3c1	Up regulation
ENSMUSG00000033739.9	74.697	0.357757	0.161633	0.0122969	0.0485206	Fkbpl	Up regulation
ENSMUSG00000033763.15	2947.32	0.773508	0.226403	4.2053e-05	0.000408983	Mtss2	Up regulation
ENSMUSG00000033768.18	44.5443	0.459963	0.223261	0.0108836	0.0438676	Nrxn2	Up regulation
ENSMUSG00000033793.13	607.485	0.442842	0.166819	0.00246645	0.0130934	Atp6v1h	Up regulation
ENSMUSG00000033813.16	522.733	0.237055	0.0754245	0.00124211	0.00737854	Tcea1	Up regulation
ENSMUSG00000033849.4	465.823	0.844508	0.592533	0.0093535	0.0387294	B3galt2	Up regulation
ENSMUSG00000033863.3	4908.21	0.62655	0.148715	2.89966e-06	3.99106e-05	Klf9	Up regulation
ENSMUSG00000033916.6	1320.59	0.423466	0.125785	0.00026847	0.00203289	Chmp2a	Up regulation
ENSMUSG00000033918.17	659.023	0.297878	0.127159	0.0113736	0.0454893	Parl	Up regulation
ENSMUSG00000034006.18	832.32	1.03012	0.512132	0.00175218	0.009859	Slc66a2	Up regulation
ENSMUSG00000034024.9	2617.94	0.486384	0.122805	1.8944e-05	0.000206046	Cct2	Up regulation
ENSMUSG00000034032.16	661.611	0.266394	0.110273	0.0104678	0.0425048	Rpap1	Up regulation
ENSMUSG00000034066.14	508.156	0.556384	0.129502	2.93975e-06	4.03547e-05	Farp2	Up regulation
ENSMUSG00000034075.11	3195.56	0.51406	0.140424	5.43188e-05	0.000509404	Zdhhc5	Up regulation
ENSMUSG00000034088.16	13985.5	0.501335	0.136815	5.75529e-05	0.000535908	Hdlbp	Up regulation
ENSMUSG00000034135.16	2186.41	0.679004	0.075035	1.1538e-20	2.20684e-18	Sik3	Up regulation
ENSMUSG00000034157.13	1121.74	0.450178	0.17734	0.00331262	0.016693	Cipc	Up regulation
ENSMUSG00000034158.10	2142.89	0.51714	0.0819497	5.9424e-11	2.43554e-09	Lrrc58	Up regulation
ENSMUSG00000034175.14	265.052	0.447483	0.151104	0.000939838	0.00584901	Rhbdd3	Up regulation
ENSMUSG00000034189.6	428.536	0.423389	0.131827	0.000463361	0.00324605	Hsdl1	Up regulation
ENSMUSG00000034194.19	325.496	0.336004	0.120566	0.0027746	0.0144064	R3hcc1	Up regulation
ENSMUSG00000034220.8	9643.54	0.665768	0.21882	0.000239777	0.00184634	Gpc1	Up regulation
ENSMUSG00000034235.18	426.419	0.632188	0.141101	8.2534e-07	1.29551e-05	Usp54	Up regulation
ENSMUSG00000034297.15	4150.04	0.382136	0.112917	0.00030954	0.00228688	Med13	Up regulation
ENSMUSG00000034300.18	684.263	0.337733	0.105046	0.000685992	0.00451172	Fam53c	Up regulation
ENSMUSG00000034341.18	1067.71	0.420835	0.159957	0.00295683	0.0151575	Wbp2	Up regulation
ENSMUSG00000034354.19	3132.73	0.38037	0.110903	0.000264573	0.00201146	Mtmr3	Up regulation
ENSMUSG00000034361.11	410.811	1.32057	0.305732	6.24866e-07	1.01031e-05	Cpne2	Up regulation
ENSMUSG00000034377.11	4950.42	0.751055	0.158007	1.29684e-07	2.51583e-06	Tulp4	Up regulation
ENSMUSG00000034430.17	767.374	0.584795	0.0911793	1.995e-11	8.86626e-10	Zxdc	Up regulation
ENSMUSG00000034457.11	929.085	2.73549	0.23553	1.05714e-33	7.3774e-31	Eda2r	Up regulation
ENSMUSG00000034460.10	1424.45	0.931241	0.123745	2.37479e-15	2.16677e-13	Six4	Up regulation
ENSMUSG00000034485.11	10601.5	0.377623	0.163483	0.00878596	0.0368283	Uaca	Up regulation
ENSMUSG00000034522.11	612.998	0.434791	0.176953	0.0044898	0.0214589	Zfp395	Up regulation
ENSMUSG00000034543.16	938.543	0.270762	0.0881511	0.00142929	0.00831395	Morc2a	Up regulation
ENSMUSG00000034563.17	78.5419	0.823936	0.225934	1.49678e-05	0.00016877	Ccpg1	Up regulation
ENSMUSG00000034610.15	1238.1	0.365754	0.111396	0.000478511	0.00333485	Tut4	Up regulation
ENSMUSG00000034614.15	685.138	1.42819	0.229324	2.87532e-11	1.24153e-09	Pik3ip1	Up regulation
ENSMUSG00000034617.8	436.948	0.576907	0.15455	2.87981e-05	0.000296253	Mtrr	Up regulation
ENSMUSG00000034621.15	2161.98	0.632712	0.161612	1.02009e-05	0.000120769	Gpatch8	Up regulation
ENSMUSG00000034640.10	615.119	0.554596	0.205699	0.00122536	0.0073055	Tiparp	Up regulation
ENSMUSG00000034648.10	1011.61	1.16938	0.420349	0.00017415	0.00140303	Lrrn1	Up regulation
ENSMUSG00000034663.14	821.08	0.550467	0.12543	1.99701e-06	2.87109e-05	Bmp2k	Up regulation
ENSMUSG00000034681.18	1090.42	0.474086	0.0946121	1.48961e-07	2.85759e-06	Rnps1	Up regulation
ENSMUSG00000034707.8	1554.07	0.252179	0.0837547	0.00184863	0.0103078	Gns	Up regulation
ENSMUSG00000034723.12	858.793	0.547084	0.19362	0.000854526	0.00540537	Tmx4	Up regulation
ENSMUSG00000034729.17	688.246	0.356039	0.121436	0.00162049	0.00925111	Mrps10	Up regulation
ENSMUSG00000034780.7	228.521	1.31112	0.28905	2.4346e-07	4.42391e-06	B3galt1	Up regulation
ENSMUSG00000034795.15	121.873	1.56313	0.231844	9.27356e-13	5.1942e-11	Ccdc122	Up regulation
ENSMUSG00000034810.8	608.585	0.874065	0.171507	1.63833e-08	4.02507e-07	Scn7a	Up regulation
ENSMUSG00000034825.15	6.58007	1.24562	0.736553	0.00162202	0.00925776	Nrip3	Up regulation
ENSMUSG00000034839.6	63.5645	0.663028	0.229005	0.000396701	0.00283353	Larp6	Up regulation
ENSMUSG00000034842.17	2637.08	0.835592	0.334673	0.000780386	0.00502377	Art3	Up regulation
ENSMUSG00000034855.14	17.8565	2.51944	0.538398	9.79583e-09	2.52685e-07	Cxcl10	Up regulation
ENSMUSG00000034858.18	1781.76	0.622556	0.192603	0.000150506	0.00124558	Atosa	Up regulation
ENSMUSG00000034892.9	906.564	0.469541	0.191702	0.00384174	0.0189216	Rps29	Up regulation
ENSMUSG00000034898.18	6958.33	0.868812	0.116006	3.20593e-15	2.81566e-13	Filip1	Up regulation
ENSMUSG00000034908.17	1192.65	0.446324	0.0573995	2.45361e-15	2.20748e-13	Sidt2	Up regulation
ENSMUSG00000034910.6	746.901	1.16059	0.143659	3.94187e-17	4.58482e-15	Pygo1	Up regulation
ENSMUSG00000034917.9	31.1411	4.37757	0.496745	4.49306e-23	1.18383e-20	Tjp3	Up regulation
ENSMUSG00000034940.16	1935.8	0.662082	0.145243	4.89555e-07	8.1501e-06	Synrg	Up regulation
ENSMUSG00000034994.11	30752.2	1.03581	0.11184	1.03247e-21	2.29823e-19	Eef2	Up regulation
ENSMUSG00000034998.19	755.629	0.318164	0.101238	0.000950773	0.00589575	Foxn2	Up regulation
ENSMUSG00000035049.5	1706.2	0.437755	0.163117	0.00232512	0.0124869	Rrp12	Up regulation
ENSMUSG00000035064.18	1725.14	0.649155	0.320583	0.00516015	0.024081	Eef2k	Up regulation
ENSMUSG00000035093.17	1801.89	0.360867	0.123068	0.00158394	0.00907113	Secisbp2l	Up regulation
ENSMUSG00000035105.6	1356.89	1.47793	0.280012	6.31658e-09	1.69835e-07	Egln3	Up regulation
ENSMUSG00000035126.21	83.3884	1.12599	0.713653	0.00280759	0.014528	Dnai4	Up regulation
ENSMUSG00000035139.15	599.249	0.242767	0.083422	0.00262943	0.0137997	Secisbp2	Up regulation
ENSMUSG00000035142.19	85.9705	0.60143	0.169474	5.19498e-05	0.000489918	Nubpl	Up regulation
ENSMUSG00000035164.9	781.759	0.404398	0.135984	0.00112705	0.00679149	Zc3h12c	Up regulation
ENSMUSG00000035184.16	164.829	1.01931	0.167439	5.21376e-11	2.15399e-09	Fam124a	Up regulation
ENSMUSG00000035189.18	76.6073	0.811766	0.343117	0.00121579	0.00725512	Ano4	Up regulation
ENSMUSG00000035226.6	76.1535	0.949055	0.274715	2.4802e-05	0.000259276	Rims4	Up regulation
ENSMUSG00000035227.8	1036.36	0.485744	0.18096	0.00180785	0.0101238	Spcs2	Up regulation
ENSMUSG00000035235.14	138.117	0.465695	0.212278	0.0076452	0.0330111	Trim13	Up regulation
ENSMUSG00000035242.17	1638.42	0.402432	0.140978	0.00165912	0.0094341	Oaz1	Up regulation
ENSMUSG00000035247.18	12348	0.817469	0.108458	2.3948e-15	2.17456e-13	Hectd1	Up regulation
ENSMUSG00000035268.15	1240.92	0.313186	0.0749745	1.74595e-05	0.00019233	Pkig	Up regulation
ENSMUSG00000035283.6	17.8132	1.01894	0.380496	0.000305822	0.00226589	Adrb1	Up regulation
ENSMUSG00000035296.15	3337.72	0.539257	0.11362	3.87183e-07	6.64724e-06	Sgcg	Up regulation
ENSMUSG00000035297.15	1880.06	0.730002	0.186809	6.8615e-06	8.53836e-05	Cops4	Up regulation
ENSMUSG00000035394.12	16.5197	0.908646	0.341239	0.00039749	0.00283838	Cfap53	Up regulation
ENSMUSG00000035399.13	166.404	0.540429	0.178377	0.000457793	0.00321388	Oser1	Up regulation
ENSMUSG00000035437.16	1822.18	0.33609	0.0721593	1.74336e-06	2.52753e-05	Rabgap1	Up regulation
ENSMUSG00000035443.11	212.599	0.501577	0.167658	0.000638271	0.00424325	Thyn1	Up regulation
ENSMUSG00000035459.19	242.164	0.751969	0.385338	0.0043469	0.0208977	Stab2	Up regulation
ENSMUSG00000035469.18	601.571	0.420851	0.0945959	3.16068e-06	4.30443e-05	Rcbtb1	Up regulation
ENSMUSG00000035498.11	2.76827	1.74023	0.978612	0.000243321	0.00186877	Cdcp1	Up regulation
ENSMUSG00000035521.14	192.552	0.335476	0.140206	0.00855583	0.0361039	Gnptg	Up regulation
ENSMUSG00000035529.11	553.346	0.362125	0.143554	0.00533982	0.0246919	Prdm4	Up regulation
ENSMUSG00000035530.14	5809.79	1.03778	0.194433	4.1753e-09	1.16678e-07	Eif1	Up regulation
ENSMUSG00000035569.18	6982.12	0.29151	0.104928	0.00338991	0.0170219	Ankrd11	Up regulation
ENSMUSG00000035572.17	486.55	0.386601	0.104354	9.06644e-05	0.00080393	Dcaf10	Up regulation
ENSMUSG00000035629.20	1072.01	0.360061	0.101789	0.000194921	0.00154483	Rubcn	Up regulation
ENSMUSG00000035757.18	422.939	0.482599	0.109545	2.74686e-06	3.80303e-05	Selenoo	Up regulation
ENSMUSG00000035765.11	1753.51	0.761788	0.21588	2.84168e-05	0.000292798	Dym	Up regulation
ENSMUSG00000035770.9	3134.87	0.515287	0.175832	0.000722899	0.00470176	Dync1li2	Up regulation
ENSMUSG00000035781.16	1910.86	0.478895	0.127587	4.59811e-05	0.000441368	R3hdm4	Up regulation
ENSMUSG00000035790.16	270.795	0.54077	0.218392	0.00249235	0.0132091	Cep19	Up regulation
ENSMUSG00000035828.12	785.635	0.830486	0.182356	2.74926e-07	4.92294e-06	Pim3	Up regulation
ENSMUSG00000035829.14	145.045	0.685203	0.278763	0.00140159	0.00818601	Ppp1r26	Up regulation
ENSMUSG00000035860.10	46.4888	3.42084	0.428462	1.08429e-18	1.5729e-16	Cdhr3	Up regulation
ENSMUSG00000035877.18	1524.45	0.269392	0.0982843	0.00409278	0.0199208	Zhx3	Up regulation
ENSMUSG00000035890.10	841.285	0.666897	0.209286	0.000144757	0.00120309	Rnf126	Up regulation
ENSMUSG00000035916.9	16.8415	0.70228	0.401008	0.00816054	0.0347425	Ptprq	Up regulation
ENSMUSG00000035923.5	2565.69	1.06276	0.157132	6.57072e-13	3.74531e-11	Myf6	Up regulation
ENSMUSG00000035934.17	803.697	0.514609	0.212343	0.003283	0.0165535	Pknox2	Up regulation
ENSMUSG00000035949.16	852.747	0.330544	0.0664901	3.71703e-07	6.43195e-06	Fbxw2	Up regulation
ENSMUSG00000035963.9	103.566	4.03483	1.71329	2.44293e-07	4.43592e-06	Cimap1d	Up regulation
ENSMUSG00000035983.5	19.9572	0.773623	0.256739	0.000179003	0.00143634	Gm7008	Up regulation
ENSMUSG00000035992.16	3312.19	0.561754	0.1804	0.000308341	0.00228128	Fnip1	Up regulation
ENSMUSG00000036002.13	628.909	0.901463	0.252719	1.74175e-05	0.000191949	Atosb	Up regulation
ENSMUSG00000036022.16	44.3648	0.532036	0.195591	0.00127709	0.00756498	Pabir2	Up regulation
ENSMUSG00000036052.15	5010.02	0.475058	0.140369	0.000190929	0.00151963	Dnajb5	Up regulation
ENSMUSG00000036062.14	53.1653	0.720549	0.387019	0.0059632	0.0270323	Phf24	Up regulation
ENSMUSG00000036073.19	565.964	0.835787	0.231029	1.63238e-05	0.000181312	Galt	Up regulation
ENSMUSG00000036087.19	5629.93	0.585851	0.115912	6.11001e-08	1.30494e-06	Slain2	Up regulation
ENSMUSG00000036097.10	1355.76	0.249888	0.0712412	0.000325834	0.00239084	Slf2	Up regulation
ENSMUSG00000036099.17	1027.12	0.80891	0.113313	4.80728e-14	3.44802e-12	Vezt	Up regulation
ENSMUSG00000036104.13	1997.03	0.469724	0.149306	0.000453519	0.00318908	Rab3gap1	Up regulation
ENSMUSG00000036114.4	174.61	0.354337	0.142416	0.00608596	0.027497	Rpp25l	Up regulation
ENSMUSG00000036139.7	303.208	0.498337	0.103947	3.89066e-07	6.6707e-06	Hoxc9	Up regulation
ENSMUSG00000036181.3	5718.27	0.497428	0.143655	0.000126618	0.00107019	H1f2	Up regulation
ENSMUSG00000036198.13	9.45342	1.8291	0.582986	1.67684e-05	0.000185668	Arhgap36	Up regulation
ENSMUSG00000036202.17	1352.88	0.367644	0.132803	0.00255187	0.0134528	Rif1	Up regulation
ENSMUSG00000036242.16	242.776	0.738414	0.298824	0.0011195	0.00675545	Armh4	Up regulation
ENSMUSG00000036257.16	2767.07	0.520141	0.224417	0.00424901	0.0205341	Pnpla8	Up regulation
ENSMUSG00000036275.14	1551.9	0.705399	0.194467	2.36916e-05	0.000249385	9530068E07Rik	Up regulation
ENSMUSG00000036282.16	714.91	0.351144	0.0889847	4.02094e-05	0.000393214	Naa30	Up regulation
ENSMUSG00000036309.15	4848.03	0.539788	0.150756	6.41089e-05	0.000587006	Skp1	Up regulation
ENSMUSG00000036371.7	13399.5	0.541231	0.131083	6.74168e-06	8.4014e-05	Serbp1	Up regulation
ENSMUSG00000036390.9	447.413	0.641359	0.38771	0.0124811	0.04903	Gadd45a	Up regulation
ENSMUSG00000036395.16	107.795	0.877673	0.518665	0.00531135	0.0246036	Glb1l2	Up regulation
ENSMUSG00000036442.9	429.387	0.248744	0.103753	0.0116335	0.0463705	Thap11	Up regulation
ENSMUSG00000036499.10	2805.85	0.379201	0.169354	0.0104396	0.0424036	Eea1	Up regulation
ENSMUSG00000036503.14	1049.81	0.851156	0.137108	2.57071e-11	1.1156e-09	Rnf13	Up regulation
ENSMUSG00000036510.18	1.73787	1.47098	0.99397	0.000688164	0.00452028	Cdh8	Up regulation
ENSMUSG00000036523.17	22.7363	0.822276	0.440812	0.00431222	0.0207619	Greb1	Up regulation
ENSMUSG00000036550.17	3555.24	0.45135	0.107242	7.95233e-06	9.72241e-05	Cnot1	Up regulation
ENSMUSG00000036561.10	2652.34	0.81731	0.122676	1.36108e-12	7.35136e-11	Ppp6r2	Up regulation
ENSMUSG00000036568.8	699.151	0.42014	0.0949409	3.53942e-06	4.77239e-05	Bicral	Up regulation
ENSMUSG00000036578.8	36.6362	0.773092	0.476152	0.00846924	0.0358205	Fxyd7	Up regulation
ENSMUSG00000036617.18	5621.2	0.405765	0.15177	0.00281684	0.01457	Etl4	Up regulation
ENSMUSG00000036620.15	757.752	0.41816	0.177311	0.0063595	0.0284196	Mgat4b	Up regulation
ENSMUSG00000036693.13	1144.69	0.516261	0.0980403	2.99216e-08	6.97092e-07	Nop14	Up regulation
ENSMUSG00000036698.12	4213.86	0.364724	0.155778	0.00860037	0.0362268	Ago2	Up regulation
ENSMUSG00000036707.17	5653.98	0.6946	0.142598	8.94821e-08	1.83229e-06	Cab39	Up regulation
ENSMUSG00000036712.17	1329.54	0.753542	0.0911559	8.0966e-18	1.06123e-15	Cyld	Up regulation
ENSMUSG00000036721.15	234.623	0.34004	0.119225	0.00223243	0.0120655	Zscan12	Up regulation
ENSMUSG00000036745.16	4536.3	1.09137	0.330234	3.60162e-05	0.000357512	Ttll7	Up regulation
ENSMUSG00000036781.14	420.571	0.443322	0.168206	0.00260051	0.0136646	Rps27l	Up regulation
ENSMUSG00000036817.15	1186.31	0.423945	0.0969191	4.38643e-06	5.77867e-05	Sun1	Up regulation
ENSMUSG00000036822.7	795.244	0.236546	0.0960576	0.0101002	0.0412391	Topors	Up regulation
ENSMUSG00000036833.17	1309.12	0.796069	0.234089	4.17475e-05	0.000406165	Pnpla7	Up regulation
ENSMUSG00000036840.6	198.189	0.341328	0.110493	0.00103573	0.00633433	Siah1a	Up regulation
ENSMUSG00000036855.4	6.94525	1.95133	0.8238	6.50538e-05	0.000595025	Gjd4	Up regulation
ENSMUSG00000036864.17	133.462	0.426323	0.194933	0.00945179	0.0390738	Proser3	Up regulation
ENSMUSG00000036890.14	448.515	0.743278	0.155487	1.16429e-07	2.29315e-06	Gtdc1	Up regulation
ENSMUSG00000036955.17	946.14	0.369842	0.100912	0.00011451	0.000982317	Kifbp	Up regulation
ENSMUSG00000036972.15	4.85477	0.930213	0.692959	0.0073193	0.0318611	Zic4	Up regulation
ENSMUSG00000036980.14	615.384	0.340811	0.119681	0.00225581	0.0121627	Taf6	Up regulation
ENSMUSG00000037017.16	451.145	0.341799	0.0897409	7.33614e-05	0.000664654	Zscan21	Up regulation
ENSMUSG00000037035.6	53.0457	1.22007	0.308348	2.88549e-06	3.97578e-05	Inhbb	Up regulation
ENSMUSG00000037086.4	3.25085	0.869204	0.634117	0.00911403	0.0379509	Prr32	Up regulation
ENSMUSG00000037098.19	5260.71	0.474926	0.21965	0.00790134	0.0339017	Rab11fip3	Up regulation
ENSMUSG00000037143.18	7.75062	1.40587	0.811749	0.000879369	0.00553539	Cfap61	Up regulation
ENSMUSG00000037148.9	2063.82	0.575449	0.173825	0.000144157	0.00119916	Arhgap10	Up regulation
ENSMUSG00000037149.11	3141.74	0.737414	0.165145	5.52686e-07	9.06665e-06	Ddx1	Up regulation
ENSMUSG00000037157.9	5.85762	0.808266	0.860446	0.00896682	0.0374224	Il22ra1	Up regulation
ENSMUSG00000037174.19	1677.01	0.197119	0.0777974	0.0091529	0.0380882	Elf2	Up regulation
ENSMUSG00000037185.10	176.653	1.3696	0.537094	0.000221624	0.00172314	Krt80	Up regulation
ENSMUSG00000037196.7	34.3765	1.54708	0.411732	4.39936e-06	5.79275e-05	Pacrg	Up regulation
ENSMUSG00000037197.12	1087.58	0.388116	0.114758	0.000303189	0.00224832	Rbm17	Up regulation
ENSMUSG00000037225.14	399.777	0.748035	0.224172	6.14895e-05	0.000567854	Fgf2	Up regulation
ENSMUSG00000037236.17	1048.69	0.639934	0.109465	5.17111e-10	1.75688e-08	Matr3	Up regulation
ENSMUSG00000037270.19	4191.67	0.376818	0.148743	0.00483994	0.0228301	Bltp1	Up regulation
ENSMUSG00000037275.15	617.326	0.306553	0.114967	0.00447591	0.0213984	Gemin5	Up regulation
ENSMUSG00000037280.13	19.0026	0.8662	0.370608	0.00114121	0.0068672	Galnt6	Up regulation
ENSMUSG00000037286.16	1638.62	0.445709	0.091556	3.63028e-07	6.3038e-06	Stag1	Up regulation
ENSMUSG00000037300.20	692.084	0.2399	0.0790503	0.00177042	0.00995079	Ttc13	Up regulation
ENSMUSG00000037316.10	262.602	0.543412	0.131708	6.74599e-06	8.40271e-05	Bag4	Up regulation
ENSMUSG00000037339.18	1555.16	0.456246	0.15417	0.000903219	0.00565657	Fam53a	Up regulation
ENSMUSG00000037341.15	318.406	0.707297	0.326853	0.00292808	0.015025	Slc9a7	Up regulation
ENSMUSG00000037351.10	4768.43	0.83744	0.308147	0.000395767	0.00282765	Actr1b	Up regulation
ENSMUSG00000037363.10	169.956	0.502502	0.169025	0.000675	0.00445417	Letm2	Up regulation
ENSMUSG00000037376.15	283.112	0.373413	0.153	0.00634553	0.0283719	Trmt6	Up regulation
ENSMUSG00000037415.8	1299.39	0.711177	0.107749	2.91849e-12	1.50116e-10	Ranbp10	Up regulation
ENSMUSG00000037443.14	2222.84	0.45726	0.129406	0.000121352	0.00103243	Cep85	Up regulation
ENSMUSG00000037447.17	646.439	1.03301	0.439373	0.000751094	0.00486065	Arid5a	Up regulation
ENSMUSG00000037470.15	3350.57	0.657214	0.165594	7.21426e-06	8.92142e-05	Uggt1	Up regulation
ENSMUSG00000037487.8	7182.19	0.324934	0.0941041	0.000309397	0.00228648	Ubr5	Up regulation
ENSMUSG00000037519.18	1846.46	0.391313	0.0916595	8.31379e-06	0.000101069	Ppfia1	Up regulation
ENSMUSG00000037526.8	320.439	0.471966	0.093307	1.17812e-07	2.31332e-06	Atg14	Up regulation
ENSMUSG00000037542.14	3.12165	0.8428	0.656216	0.0109558	0.0441121	Aldh8a1	Up regulation
ENSMUSG00000037563.16	1149.3	0.655903	0.135364	1.22403e-07	2.39075e-06	Rps16	Up regulation
ENSMUSG00000037568.13	189.703	1.14187	0.401549	0.000151442	0.00125081	Vash2	Up regulation
ENSMUSG00000037608.17	3337.28	0.460576	0.0901579	9.65064e-08	1.9575e-06	Bclaf1	Up regulation
ENSMUSG00000037613.17	105.287	1.06809	0.34341	7.19816e-05	0.000653989	Tnfrsf23	Up regulation
ENSMUSG00000037621.9	222.758	1.17515	0.219782	4.29527e-09	1.19642e-07	Atoh8	Up regulation
ENSMUSG00000037622.15	2114.73	0.466921	0.185831	0.00326828	0.0164954	Wdtc1	Up regulation
ENSMUSG00000037652.16	1607.43	0.268518	0.0657652	3.05526e-05	0.000311917	Phc3	Up regulation
ENSMUSG00000037656.10	1929.58	0.831548	0.268877	0.000115854	0.000991976	Slc20a2	Up regulation
ENSMUSG00000037674.17	1880.49	0.906487	0.100707	1.01655e-20	1.98851e-18	Rfx7	Up regulation
ENSMUSG00000037686.7	5.81211	1.32866	0.739354	0.00107632	0.006538	Aspg	Up regulation
ENSMUSG00000037703.15	124.203	0.566115	0.23293	0.00250882	0.0132719	Lzts3	Up regulation
ENSMUSG00000037708.17	11.3606	0.993111	0.44278	0.0010904	0.00661228	Spag6	Up regulation
ENSMUSG00000037709.14	1306.56	0.64384	0.323585	0.00574346	0.02616	Fam13a	Up regulation
ENSMUSG00000037730.14	502.308	0.284411	0.0901179	0.00102837	0.00629825	Mynn	Up regulation
ENSMUSG00000037736.21	8692.5	0.456931	0.164679	0.00160293	0.00916301	Limch1	Up regulation
ENSMUSG00000037742.15	10360.8	0.49003	0.246387	0.0111338	0.0446962	Eef1a1	Up regulation
ENSMUSG00000037795.15	620.763	0.318896	0.130114	0.00783987	0.0336883	N4bp2	Up regulation
ENSMUSG00000037805.16	898.038	0.597144	0.150556	9.89511e-06	0.00011758	Rpl10a	Up regulation
ENSMUSG00000037826.6	937.497	1.02229	0.207466	3.60376e-08	8.23476e-07	Ppm1k	Up regulation
ENSMUSG00000037827.6	21.337	1.03052	0.37206	0.000226819	0.00175666	Gm5884	Up regulation
ENSMUSG00000037851.15	2045.8	0.337289	0.139303	0.00786548	0.0337928	Iars1	Up regulation
ENSMUSG00000037855.16	90.4641	2.4374	0.352228	2.4452e-14	1.84613e-12	Zfp365	Up regulation
ENSMUSG00000037885.19	393.407	0.396715	0.130735	0.000961593	0.00595141	Stk35	Up regulation
ENSMUSG00000037926.16	6574.66	0.684789	0.187207	2.28554e-05	0.000241766	Ssh2	Up regulation
ENSMUSG00000037935.17	1450.24	0.475121	0.110744	4.84146e-06	6.31371e-05	Smarce1	Up regulation
ENSMUSG00000037949.9	641.255	0.242448	0.0766896	0.00114922	0.00690897	Ano10	Up regulation
ENSMUSG00000037958.14	977.591	0.282767	0.0788972	0.000220697	0.001718	Nsrp1	Up regulation
ENSMUSG00000037960.12	720.541	0.465178	0.116674	1.91216e-05	0.000207715	Card19	Up regulation
ENSMUSG00000037966.16	419.795	0.672392	0.2032	9.1053e-05	0.000807099	Ninj1	Up regulation
ENSMUSG00000037971.11	152.683	0.415263	0.178394	0.00698818	0.0307187	Cfap68	Up regulation
ENSMUSG00000037993.9	797.702	0.29294	0.103005	0.00275553	0.0143247	Dhx38	Up regulation
ENSMUSG00000037994.15	10.3976	1.57334	0.613816	0.000131891	0.00111111	Slc9b2	Up regulation
ENSMUSG00000037996.18	121.457	0.837986	0.636695	0.0108849	0.0438676	Slc24a2	Up regulation
ENSMUSG00000038007.15	123.143	1.08206	0.237126	2.13326e-07	3.94577e-06	Acer2	Up regulation
ENSMUSG00000038025.9	2050.95	0.490422	0.124219	1.9512e-05	0.000211075	Phf2	Up regulation
ENSMUSG00000038047.19	257.538	0.43867	0.141398	0.000620208	0.00413915	Haus6	Up regulation
ENSMUSG00000038056.16	5328.24	0.334491	0.0827169	2.85906e-05	0.000294236	Kmt2c	Up regulation
ENSMUSG00000038065.14	411.973	1.36482	0.156433	2.11124e-19	3.47225e-17	Mturn	Up regulation
ENSMUSG00000038068.16	723.573	0.691938	0.206737	7.30114e-05	0.000661947	Rnf144b	Up regulation
ENSMUSG00000038102.16	1110.03	0.285995	0.0926495	0.00129122	0.0076399	Trappc11	Up regulation
ENSMUSG00000038116.17	970.233	0.429225	0.0856615	1.91461e-07	3.57981e-06	Phf20	Up regulation
ENSMUSG00000038132.7	4859.34	0.784444	0.135182	3.64362e-10	1.26966e-08	Rbm24	Up regulation
ENSMUSG00000038170.16	178281	1.42333	0.130667	1.10238e-28	4.59104e-26	Pde4dip	Up regulation
ENSMUSG00000038174.15	656.382	1.16028	0.246093	1.0558e-07	2.11332e-06	Hycc2	Up regulation
ENSMUSG00000038175.11	731.089	1.31797	0.146119	1.47162e-20	2.75353e-18	Mylip	Up regulation
ENSMUSG00000038206.14	467.56	0.358278	0.0889779	2.78171e-05	0.000287536	Fbxo8	Up regulation
ENSMUSG00000038215.16	214.194	0.289508	0.114616	0.00713546	0.0312226	Cep44	Up regulation
ENSMUSG00000038259.5	8.94475	1.96811	0.653761	1.62574e-05	0.000181019	Gdf5	Up regulation
ENSMUSG00000038260.11	687.061	0.488132	0.212889	0.00531127	0.0246036	Trpm4	Up regulation
ENSMUSG00000038274.14	2042.33	0.643123	0.138451	3.53846e-07	6.17972e-06	Fau	Up regulation
ENSMUSG00000038276.13	11.8079	1.14786	0.547152	0.0010707	0.00650658	Asic3	Up regulation
ENSMUSG00000038290.16	1393.63	0.406508	0.154223	0.00313207	0.0159293	Smg6	Up regulation
ENSMUSG00000038299.17	614.803	0.30779	0.0987232	0.00107657	0.006538	Wdr36	Up regulation
ENSMUSG00000038324.14	2505.81	0.343398	0.0881138	5.08581e-05	0.000481192	Trpc4ap	Up regulation
ENSMUSG00000038332.14	895.875	1.74164	0.158967	3.32473e-29	1.45505e-26	Sesn1	Up regulation
ENSMUSG00000038342.16	3255.77	0.558174	0.11081	7.86878e-08	1.63328e-06	Mlxip	Up regulation
ENSMUSG00000038344.15	516.327	0.437436	0.128664	0.000221258	0.00172097	Txlng	Up regulation
ENSMUSG00000038354.14	92.9685	0.622285	0.252116	0.00175096	0.00985644	Ankrd35	Up regulation
ENSMUSG00000038383.17	426.886	0.454498	0.144959	0.00051039	0.00351997	Pigu	Up regulation
ENSMUSG00000038384.17	1260.05	0.437216	0.0974263	2.419e-06	3.40448e-05	Setd1b	Up regulation
ENSMUSG00000038388.15	3766.89	1.03409	0.22289	1.4894e-07	2.85759e-06	Pals2	Up regulation
ENSMUSG00000038415.11	5.66433	1.03507	0.781588	0.00467901	0.0222014	Foxq1	Up regulation
ENSMUSG00000038437.12	2585.92	0.440012	0.125416	0.000146339	0.00121499	Mllt6	Up regulation
ENSMUSG00000038459.11	154.002	0.566686	0.198282	0.000698476	0.00456938	Abhd17c	Up regulation
ENSMUSG00000038467.16	2768.6	0.279915	0.114393	0.00918444	0.0382064	Chmp4b	Up regulation
ENSMUSG00000038495.15	2381.26	0.608687	0.118005	3.08804e-08	7.16409e-07	Otud7b	Up regulation
ENSMUSG00000038502.18	1717.48	0.351607	0.135958	0.00468199	0.0222014	Ptov1	Up regulation
ENSMUSG00000038520.16	843.216	0.614193	0.112876	6.31651e-09	1.69835e-07	Tbc1d17	Up regulation
ENSMUSG00000038526.15	660.842	0.936479	0.403591	0.00100985	0.00621135	Car14	Up regulation
ENSMUSG00000038528.16	11.5214	0.963281	0.535994	0.00333464	0.0167778	Mfsd4b5	Up regulation
ENSMUSG00000038533.16	646.103	0.339457	0.136398	0.00648584	0.0288541	Cbfa2t2	Up regulation
ENSMUSG00000038535.18	1065.64	0.474217	0.147731	0.000355528	0.00258349	Zfp280d	Up regulation
ENSMUSG00000038538.18	3057.42	0.623579	0.081753	2.63469e-15	2.35399e-13	Ubn2	Up regulation
ENSMUSG00000038541.9	1.33672	1.46215	1.04987	0.000640208	0.00425394	Srd5a2	Up regulation
ENSMUSG00000038546.10	1363.78	0.652727	0.105624	6.11826e-11	2.49968e-09	Ranbp9	Up regulation
ENSMUSG00000038563.15	451.545	0.320604	0.0805908	3.98342e-05	0.000389901	Efl1	Up regulation
ENSMUSG00000038594.10	6422.66	2.21976	0.154192	5.96635e-49	1.28381e-45	Cep85l	Up regulation
ENSMUSG00000038612.17	5831.14	0.427856	0.201237	0.0108839	0.0438676	Mcl1	Up regulation
ENSMUSG00000038615.18	16893.9	0.638878	0.236998	0.00082866	0.00527795	Nfe2l1	Up regulation
ENSMUSG00000038618.13	11.8971	1.44868	0.424154	1.62861e-05	0.000181104	Rassf7	Up regulation
ENSMUSG00000038619.13	3360.94	0.561549	0.149871	2.96196e-05	0.000303255	Ensa	Up regulation
ENSMUSG00000038622.9	249.503	0.373877	0.130248	0.00181204	0.0101406	Med30	Up regulation
ENSMUSG00000038642.11	390.345	0.546305	0.221182	0.00246871	0.0131027	Ctss	Up regulation
ENSMUSG00000038646.14	212.615	0.553821	0.197869	0.00089741	0.00563058	Ramac	Up regulation
ENSMUSG00000038664.17	7399.86	0.278418	0.11275	0.00868373	0.0365005	Herc1	Up regulation
ENSMUSG00000038708.11	31198.1	0.681201	0.120039	1.15838e-09	3.65655e-08	Golga4	Up regulation
ENSMUSG00000038712.17	874.893	0.36974	0.147569	0.005405	0.0249263	Mindy1	Up regulation
ENSMUSG00000038717.10	1184.42	0.506712	0.182281	0.0012141	0.00724752	Atp5mg	Up regulation
ENSMUSG00000038733.15	7128.69	0.798228	0.126851	1.65978e-11	7.53887e-10	Wdr26	Up regulation
ENSMUSG00000038762.16	4273.38	0.386325	0.120674	0.000577783	0.00389732	Abcf1	Up regulation
ENSMUSG00000038763.13	26381.7	0.653242	0.341219	0.00665365	0.0294942	Alpk3	Up regulation
ENSMUSG00000038784.14	1003.89	0.493431	0.132914	4.98438e-05	0.000472647	Cnot4	Up regulation
ENSMUSG00000038866.16	719.28	0.366455	0.12078	0.0011119	0.00672195	Zcchc2	Up regulation
ENSMUSG00000038876.13	1125.52	0.454558	0.117713	3.40668e-05	0.000340813	Rnf146	Up regulation
ENSMUSG00000038880.14	913.143	0.336422	0.114531	0.0017336	0.00978005	Mrps34	Up regulation
ENSMUSG00000038894.8	2248.55	0.974955	0.261705	8.43358e-06	0.00010214	Irs2	Up regulation
ENSMUSG00000038900.18	2296.34	0.843482	0.153033	1.74746e-09	5.30839e-08	Rpl12	Up regulation
ENSMUSG00000038909.18	733.687	0.260913	0.0763907	0.000443638	0.00312386	Kat7	Up regulation
ENSMUSG00000038936.14	781.9	0.443391	0.164374	0.00216849	0.0117904	Sccpdh	Up regulation
ENSMUSG00000038967.14	9874.44	0.899823	0.21231	1.05437e-06	1.61095e-05	Pdk2	Up regulation
ENSMUSG00000039001.13	1724.97	0.640074	0.225869	0.000533999	0.00365546	Rps21	Up regulation
ENSMUSG00000039033.12	206.278	0.284637	0.12158	0.0119891	0.0475091	Tasp1	Up regulation
ENSMUSG00000039037.6	9.90842	0.879904	0.478389	0.0038715	0.0190303	St6galnac5	Up regulation
ENSMUSG00000039041.16	1558.62	0.706044	0.135746	1.49831e-08	3.7022e-07	Adrm1	Up regulation
ENSMUSG00000039067.6	3756.34	0.614876	0.131646	3.62865e-07	6.3038e-06	Psmd7	Up regulation
ENSMUSG00000039081.11	344.666	0.784685	0.459708	0.00687253	0.0303187	Zfp503	Up regulation
ENSMUSG00000039100.11	5767.36	0.560771	0.183308	0.000373007	0.00268733	Marchf6	Up regulation
ENSMUSG00000039115.14	793.094	0.825715	0.358253	0.00138882	0.00811877	Itga9	Up regulation
ENSMUSG00000039128.14	618.113	0.463867	0.137467	0.000210428	0.00165	Cdc123	Up regulation
ENSMUSG00000039179.14	1.54993	0.853646	0.826462	0.00902823	0.0376361	Tekt5	Up regulation
ENSMUSG00000039191.13	857.76	0.305877	0.124442	0.00809768	0.0345489	Rbpj	Up regulation
ENSMUSG00000039201.11	83.3418	0.697826	0.244416	0.000393726	0.00281462	Tbc1d25	Up regulation
ENSMUSG00000039206.14	577.764	0.418556	0.198877	0.0119959	0.047529	Daglb	Up regulation
ENSMUSG00000039218.18	14269.2	0.269301	0.0887651	0.00162674	0.0092806	Srrm2	Up regulation
ENSMUSG00000039219.19	1548.33	0.194931	0.072278	0.00571931	0.0260962	Arid4b	Up regulation
ENSMUSG00000039230.15	534.241	0.3692	0.128809	0.00187646	0.0104377	Tbcd	Up regulation
ENSMUSG00000039231.19	130.036	0.792484	0.140093	8.46536e-10	2.76339e-08	Suv39h1	Up regulation
ENSMUSG00000039263.17	1300.54	0.419659	0.156146	0.00252106	0.013323	Npepl1	Up regulation
ENSMUSG00000039328.12	298.726	0.530692	0.120489	2.08413e-06	2.9814e-05	Rnf122	Up regulation
ENSMUSG00000039345.17	1255.36	0.415807	0.141207	0.00116851	0.00700863	Mettl22	Up regulation
ENSMUSG00000039347.8	500.303	0.568967	0.127521	1.27762e-06	1.90976e-05	Atp6v0e2	Up regulation
ENSMUSG00000039367.12	1513.58	0.21693	0.0807118	0.00558315	0.0255761	Sec24c	Up regulation
ENSMUSG00000039376.14	9893.29	0.796539	0.278705	0.000281315	0.00210424	Synpo2l	Up regulation
ENSMUSG00000039382.13	149.563	0.62598	0.115365	6.44007e-09	1.7232e-07	Wdr45	Up regulation
ENSMUSG00000039395.9	1873.49	0.844337	0.24696	3.44387e-05	0.000343734	Mreg	Up regulation
ENSMUSG00000039414.11	565.922	0.201861	0.0765965	0.00675586	0.0298804	Heatr5b	Up regulation
ENSMUSG00000039427.15	236.845	0.306421	0.105472	0.00216385	0.0117701	Alg1	Up regulation
ENSMUSG00000039449.15	1394.29	0.419155	0.0982715	7.35495e-06	9.07368e-05	Prpf18	Up regulation
ENSMUSG00000039450.12	87.6629	0.63042	0.184085	7.19269e-05	0.000653722	Dcxr	Up regulation
ENSMUSG00000039456.12	760.878	0.242071	0.081289	0.00211937	0.0115647	Morc3	Up regulation
ENSMUSG00000039457.5	406.875	2.18438	0.267355	3.63627e-18	4.94169e-16	Ppl	Up regulation
ENSMUSG00000039461.13	672.31	0.988144	0.341137	0.000163426	0.00133243	Tcta	Up regulation
ENSMUSG00000039523.17	1650.85	0.586247	0.114992	4.83669e-08	1.06651e-06	Cep104	Up regulation
ENSMUSG00000039536.17	1388.13	0.346873	0.104643	0.000465513	0.0032601	Stau1	Up regulation
ENSMUSG00000039542.17	1179.25	0.96249	0.489463	0.00231519	0.0124362	Ncam1	Up regulation
ENSMUSG00000039556.17	47.6158	0.979339	0.242955	2.38916e-06	3.36554e-05	Ppp1r3f	Up regulation
ENSMUSG00000039585.16	1770.56	0.444569	0.172949	0.00311443	0.015853	Myo9a	Up regulation
ENSMUSG00000039616.11	137.393	0.359933	0.156716	0.00986593	0.0404586	Mocos	Up regulation
ENSMUSG00000039629.15	35.9655	0.655258	0.245902	0.000850815	0.00538982	Strip2	Up regulation
ENSMUSG00000039630.11	9013.11	0.380684	0.108226	0.000190985	0.00151963	Hnrnpu	Up regulation
ENSMUSG00000039633.8	356.548	1.03741	0.236203	4.72305e-07	7.91395e-06	Lonrf1	Up regulation
ENSMUSG00000039652.17	2077.58	0.639388	0.122958	2.08159e-08	5.02795e-07	Cpeb3	Up regulation
ENSMUSG00000039661.15	1103.29	1.2335	0.494215	0.000339648	0.00247952	Dusp26	Up regulation
ENSMUSG00000039662.17	653.302	0.384078	0.106801	0.000139598	0.0011669	Icmt	Up regulation
ENSMUSG00000039686.15	923.843	0.310874	0.0775133	3.60555e-05	0.000357661	Zer1	Up regulation
ENSMUSG00000039701.12	833.776	0.54415	0.188804	0.000725587	0.00471568	Usp53	Up regulation
ENSMUSG00000039703.17	2750.37	1.0923	0.0992764	2.18083e-29	1.00556e-26	Nploc4	Up regulation
ENSMUSG00000039715.9	113.581	1.01582	0.293315	2.20793e-05	0.000234324	Dync2i2	Up regulation
ENSMUSG00000039737.12	374.869	0.246741	0.103818	0.0123761	0.0487067	Prkrip1	Up regulation
ENSMUSG00000039756.13	1162.12	0.560235	0.118215	3.53968e-07	6.17972e-06	Dnttip2	Up regulation
ENSMUSG00000039770.7	826.345	0.365769	0.138382	0.0037278	0.0184186	Ypel5	Up regulation
ENSMUSG00000039771.14	420.714	0.375558	0.145041	0.004158	0.0201925	Polr2j	Up regulation
ENSMUSG00000039781.16	422.774	0.45239	0.158256	0.00126801	0.00751979	Cep131	Up regulation
ENSMUSG00000039809.11	9.63989	1.35656	0.52346	0.000205742	0.00161817	Gabbr2	Up regulation
ENSMUSG00000039844.21	11859.5	1.03084	0.325503	6.23824e-05	0.000575277	Rapgef1	Up regulation
ENSMUSG00000039849.7	774.316	0.450255	0.105903	6.61647e-06	8.28937e-05	Pcif1	Up regulation
ENSMUSG00000039852.18	4667.59	1.01176	0.123355	1.14383e-17	1.46932e-15	Rere	Up regulation
ENSMUSG00000039879.10	1086.69	0.326593	0.116005	0.0026449	0.0138612	Heca	Up regulation
ENSMUSG00000039886.9	199.807	0.845763	0.214708	4.28487e-06	5.66512e-05	Tmem120a	Up regulation
ENSMUSG00000039891.7	21295.4	0.863841	0.131807	2.62776e-12	1.36248e-10	Txlnb	Up regulation
ENSMUSG00000039901.11	485.43	0.336775	0.101825	0.000498799	0.00345572	Armh3	Up regulation
ENSMUSG00000039910.11	1846.28	0.447214	0.189744	0.00551674	0.0253368	Cited2	Up regulation
ENSMUSG00000039960.6	469.8	1.1646	0.17576	1.88627e-12	1.00011e-10	Rhou	Up regulation
ENSMUSG00000039968.10	1018.12	0.324715	0.11708	0.00302843	0.0154632	Rsbn1l	Up regulation
ENSMUSG00000039987.16	4561.71	0.703708	0.177954	6.24215e-06	7.86251e-05	Phtf2	Up regulation
ENSMUSG00000040006.14	2033.56	0.569537	0.20806	0.00100384	0.00617881	Ginm1	Up regulation
ENSMUSG00000040018.10	793.698	0.286266	0.0960388	0.00182839	0.0102132	Cox15	Up regulation
ENSMUSG00000040025.18	947.713	0.38526	0.0907625	9.54572e-06	0.000113809	Ythdf2	Up regulation
ENSMUSG00000040035.15	9.5771	1.7125	0.69785	0.000113905	0.000978925	Disp2	Up regulation
ENSMUSG00000040078.10	95.4122	0.567615	0.222779	0.00178345	0.0100066	Ptges3-ps	Up regulation
ENSMUSG00000040093.17	152.069	0.468339	0.166617	0.00135139	0.00794858	Bmf	Up regulation
ENSMUSG00000040097.17	1310.65	0.354752	0.135213	0.00414654	0.020152	Flywch1	Up regulation
ENSMUSG00000040123.18	719.998	0.289232	0.104172	0.00343514	0.0172164	Zmym5	Up regulation
ENSMUSG00000040128.10	4026.48	1.26	0.128945	1.13417e-23	3.14896e-21	Pnrc1	Up regulation
ENSMUSG00000040151.10	601.547	0.33264	0.131318	0.00590371	0.0267908	Hs2st1	Up regulation
ENSMUSG00000040167.17	499.584	0.624524	0.111901	2.68737e-09	7.8674e-08	Ikzf5	Up regulation
ENSMUSG00000040170.14	728.382	1.71478	0.187299	2.93847e-21	6.27059e-19	Fmo2	Up regulation
ENSMUSG00000040174.15	394.711	0.311052	0.11754	0.00466457	0.0221486	Alkbh3	Up regulation
ENSMUSG00000040177.11	646.046	0.306416	0.126328	0.00882479	0.0369491	2310057M21Rik	Up regulation
ENSMUSG00000040183.14	135.154	0.676831	0.183971	2.1751e-05	0.00023141	Ankrd6	Up regulation
ENSMUSG00000040205.9	21.5091	1.22365	0.44304	0.000168455	0.00136439	Cuzd1	Up regulation
ENSMUSG00000040213.14	195.726	0.918179	0.160399	4.66299e-10	1.59686e-08	Kyat3	Up regulation
ENSMUSG00000040302.18	152.219	0.453697	0.168675	0.0021028	0.011484	Rbm48	Up regulation
ENSMUSG00000040325.17	941.873	0.317844	0.0853253	0.000112664	0.000969697	Dcaf1	Up regulation
ENSMUSG00000040327.17	973.822	0.423048	0.164223	0.00342148	0.0171545	Cul9	Up regulation
ENSMUSG00000040331.17	843.688	0.281195	0.0814842	0.000365397	0.00263968	Nsmce4a	Up regulation
ENSMUSG00000040339.11	757.685	0.292652	0.123474	0.0107848	0.0435636	Eeig2	Up regulation
ENSMUSG00000040354.15	1422.67	0.724519	0.125922	6.00319e-10	2.01572e-08	Mars1	Up regulation
ENSMUSG00000040359.15	1335.28	0.358093	0.114968	0.000883932	0.00556152	Ufl1	Up regulation
ENSMUSG00000040363.16	1445.92	0.276518	0.0974944	0.00298754	0.0152906	Bcor	Up regulation
ENSMUSG00000040385.8	2782.85	0.572421	0.12069	3.23488e-07	5.68604e-06	Ppp1ca	Up regulation
ENSMUSG00000040389.16	199.896	0.280227	0.0938152	0.00182898	0.0102132	Wdr47	Up regulation
ENSMUSG00000040410.15	297.801	0.54186	0.194978	0.00101421	0.0062278	Fbxl4	Up regulation
ENSMUSG00000040414.9	503.372	0.825565	0.153664	3.97161e-09	1.11955e-07	Slc25a28	Up regulation
ENSMUSG00000040423.12	1943.27	0.546779	0.117073	5.37002e-07	8.83663e-06	Rc3h1	Up regulation
ENSMUSG00000040430.19	2504.67	0.399602	0.157195	0.00423253	0.0204775	Pitpnc1	Up regulation
ENSMUSG00000040433.17	2659.11	0.352637	0.15368	0.0102525	0.0417619	Zbtb38	Up regulation
ENSMUSG00000040435.13	733.667	1.13517	0.0998453	3.83324e-31	2.1517e-28	Ppp1r15a	Up regulation
ENSMUSG00000040451.19	1979.43	0.577305	0.188796	0.00034424	0.0025102	Sgms1	Up regulation
ENSMUSG00000040463.17	2899.77	0.433814	0.0890302	3.78678e-07	6.53599e-06	Mybbp1a	Up regulation
ENSMUSG00000040471.18	3.46218	0.928441	0.731614	0.00759673	0.0328403	Ggt6	Up regulation
ENSMUSG00000040506.17	1026.31	0.288867	0.080558	0.000214715	0.00167954	Ambra1	Up regulation
ENSMUSG00000040524.10	1589.05	0.357852	0.127384	0.00235642	0.0126182	Zfp609	Up regulation
ENSMUSG00000040525.14	1.40184	0.781698	0.885722	0.00814156	0.0346846	Cblc	Up regulation
ENSMUSG00000040549.17	2392.33	0.356325	0.119803	0.00141341	0.00824761	Ckap5	Up regulation
ENSMUSG00000040562.13	628.641	0.60277	0.28584	0.00502248	0.0235407	Gstm2	Up regulation
ENSMUSG00000040569.14	26.8426	1.13875	0.695624	0.00250826	0.0132717	Slc26a7	Up regulation
ENSMUSG00000040586.9	443.728	0.478948	0.10803	2.4647e-06	3.45876e-05	Ofd1	Up regulation
ENSMUSG00000040667.12	1202.09	0.433595	0.107336	1.8201e-05	0.000199477	Nup88	Up regulation
ENSMUSG00000040669.15	537.545	0.87745	0.135832	4.84274e-12	2.38865e-10	Phc1	Up regulation
ENSMUSG00000040694.5	11819.6	0.731516	0.428506	0.00815303	0.034722	Apobec2	Up regulation
ENSMUSG00000040720.16	1047.57	0.24819	0.0679693	0.000189151	0.00150697	Virma	Up regulation
ENSMUSG00000040725.14	3100.23	0.421575	0.0923471	1.82475e-06	2.63827e-05	Hnrnpul1	Up regulation
ENSMUSG00000040761.17	3263.03	0.348608	0.106153	0.000515162	0.00354625	Spen	Up regulation
ENSMUSG00000040771.15	338.335	0.344997	0.142138	0.00748616	0.0324492	Oard1	Up regulation
ENSMUSG00000040785.20	4329.65	0.701223	0.129988	5.2738e-09	1.44406e-07	Ttc3	Up regulation
ENSMUSG00000040794.6	151.54	1.04253	0.24884	1.16103e-06	1.75111e-05	C1qtnf4	Up regulation
ENSMUSG00000040813.17	370.266	0.358664	0.104537	0.000290989	0.00216593	Tex264	Up regulation
ENSMUSG00000040820.17	532.043	0.464037	0.12251	4.35664e-05	0.000422429	Hlcs	Up regulation
ENSMUSG00000040859.15	985.935	0.684038	0.0986676	3.30568e-13	1.98041e-11	Bsdc1	Up regulation
ENSMUSG00000040888.12	831.523	0.663251	0.233086	0.000465915	0.00326204	Gfer	Up regulation
ENSMUSG00000040913.12	325.522	0.521369	0.143602	5.85953e-05	0.00054448	Fbxw4	Up regulation
ENSMUSG00000040952.17	1999.96	0.586504	0.167319	6.6268e-05	0.000605487	Rps19	Up regulation
ENSMUSG00000040972.9	10.7687	1.7015	0.585217	4.21296e-05	0.00040942	Igsf21	Up regulation
ENSMUSG00000040997.15	462.644	0.249459	0.0854928	0.00251616	0.0133053	Abhd4	Up regulation
ENSMUSG00000041040.13	545.805	0.475369	0.138532	0.000160512	0.00131324	Fam117b	Up regulation
ENSMUSG00000041057.11	1643.09	0.526162	0.085645	1.63027e-10	6.03083e-09	Wdr43	Up regulation
ENSMUSG00000041075.9	1946.89	0.739962	0.307001	0.0013289	0.00783416	Fzd7	Up regulation
ENSMUSG00000041096.14	544.277	0.414761	0.100174	1.30343e-05	0.000149715	Tspyl2	Up regulation
ENSMUSG00000041126.17	585.238	0.254341	0.0993276	0.00727907	0.031722	H2az2	Up regulation
ENSMUSG00000041130.11	698.904	0.321603	0.123692	0.00511298	0.0238954	Zfp598	Up regulation
ENSMUSG00000041132.12	106.026	0.7658	0.167974	3.2022e-07	5.63626e-06	N4bp2l1	Up regulation
[truncated: 4,596 more rows]
